# Supplementary material for: Switchable synthesis of 1,4-bridged dihydroisoquinoline-3-ones and isoquinoline-1,3,4-triones through radical oxidation of isoquinolinium salts with phenyliodine(iii) diacetate
Source: Royal Society of Chemistry journal article supplement (doi:10.1039/d2qo00887d), 2022-01-01

## Supporting Information

### Switchable Synthesis of 1,4-Bridged Dihydroisoquinoline-3-ones and Isoquinoline-1,3,4-triones Through Radical Oxidation of Isoquinolinium Salts with Phenyliodine (III) Diacetate

Xiao-Long Lin,<sup>[a]</sup> Yan Yu,<sup>[a]</sup> Liang Zhang,<sup>[a]</sup> Li-Jing Leng,<sup>[a]</sup> Dong-Rong Xiao,<sup>[a]</sup> Tian Cai\*<sup>[a, b]</sup>, and Qun-Li Luo\*<sup>[a, b]</sup>

<sup>[a]</sup> College of Chemistry and Chemical Engineering, Southwest University, Chongqing 400715, China.

<sup>[b]</sup> Key Laboratory of Applied Chemistry of Chongqing Municipality, Chongqing 400715, China.

### content

|                                                                                  |           |
|----------------------------------------------------------------------------------|-----------|
| <b>1 General Methods</b> .....                                                   | <b>2</b>  |
| <b>2 In situ NMR spectra for the mechanistic experiments</b> .....               | <b>3</b>  |
| 2.1 The in situ NMR spectra of the reaction mixture .....                        | 3         |
| 2.2 The <sup>1</sup> H NMR spectra of PIDA and its mixture with TBAB .....       | 5         |
| <b>3 Investigations on the mechanism of the PIDA-mediated oxidation</b> .....    | <b>5</b>  |
| 3.1 The HRMS spectrum of the reaction mixture .....                              | 5         |
| 3.2 The ESI-MS spectrum of the TEMPO-added reaction mixture .....                | 6         |
| 3.3 The NMR spectra and characterization data of (1,2-dibromoethyl)benzene ..... | 7         |
| 3.4 Possible reaction pathway for the PIDA-mediated oxidation .....              | 8         |
| <b>4 Crystallographic data of 4a</b> .....                                       | <b>9</b>  |
| <b>5 Syntheses of compounds 1-6</b> .....                                        | <b>11</b> |
| 5.1 General procedure for the syntheses of <b>1</b> .....                        | 11        |
| 5.2 General procedure for the syntheses of <b>2</b> .....                        | 11        |
| 5.3 General procedure for the syntheses of <b>3</b> .....                        | 12        |
| 5.4 General procedure for the syntheses of <b>4</b> .....                        | 28        |
| 5.5 Scale-up synthesis of <b>3a</b> .....                                        | 37        |
| 5.6 Scale-up synthesis of <b>4a</b> .....                                        | 38        |
| 5.7 Synthesis of <b>5</b> via debrominative reduction of <b>3a</b> .....         | 38        |
| 5.8 Synthesis of <b>6</b> via rearrangement/reduction of <b>4a</b> .....         | 39        |
| <b>6 Reference</b> .....                                                         | <b>40</b> |
| <b>7. NMR spectra of compounds 2 – 6</b> .....                                   | <b>42</b> |

## 1 General Methods

Unless otherwise noted, commercially available reagents were used as received. All solvents for chromatographic separations were distilled before use. Solvents for the water-free reactions were dried with standard procedures and stored with Schlenk flasks over molecular sieves. Column chromatography was carried out with 200–300 mesh silica gel. Thin-layer chromatography (TLC) was performed on glassbacked silica plates. UV light,  $I_2$ , and solutions of 2,4-dinitrophenylhydrazine were used to visualize products. Concentrating a solution under reduced pressure refers to distillation using a rotary evaporator attached to a vacuum pump (3–10 mmHg). Products obtained as solids or high boiling oils were dried under vacuum (1–3 mmHg).  $^1\text{H}$  and  $^{13}\text{C}$  NMR spectra were recorded on a 600 MHz NMR spectrometer at 293 K, and the chemical shifts ( $\delta$ ) were internally referenced by the residual solvent signals relative to tetramethylsilane ( $\text{CDCl}_3$  at 7.26 ppm for  $^1\text{H}$ , and at 77.00 ppm for  $^{13}\text{C}$ ). Data are reported as s = singlet, d = doublet, t = triplet, q = quartet, m = multiplet, b = broad; coupling constant(s) in Hz; integration. The yields in the text refer to isolated yields of compounds.

## 2 In situ NMR spectra for the mechanistic experiments

### 2.1 The in situ NMR spectra of the reaction mixture

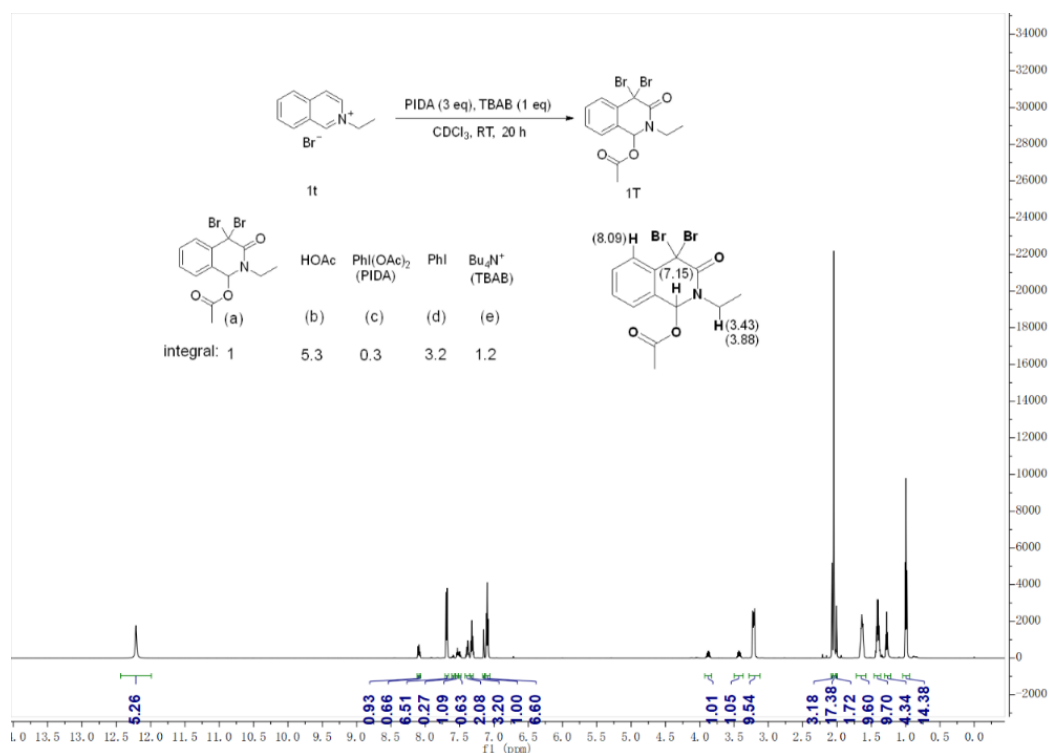

Figure S1. *In situ* <sup>1</sup>H NMR of 1T

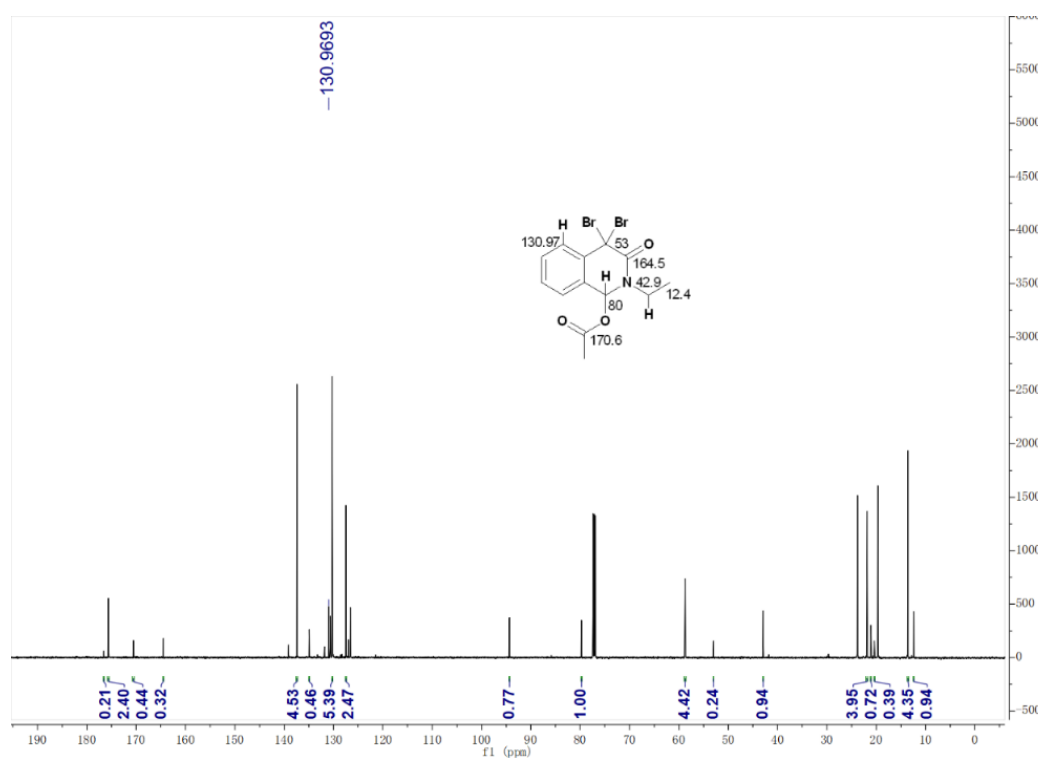

Figure S2. *In situ* <sup>13</sup>C NMR of 1T

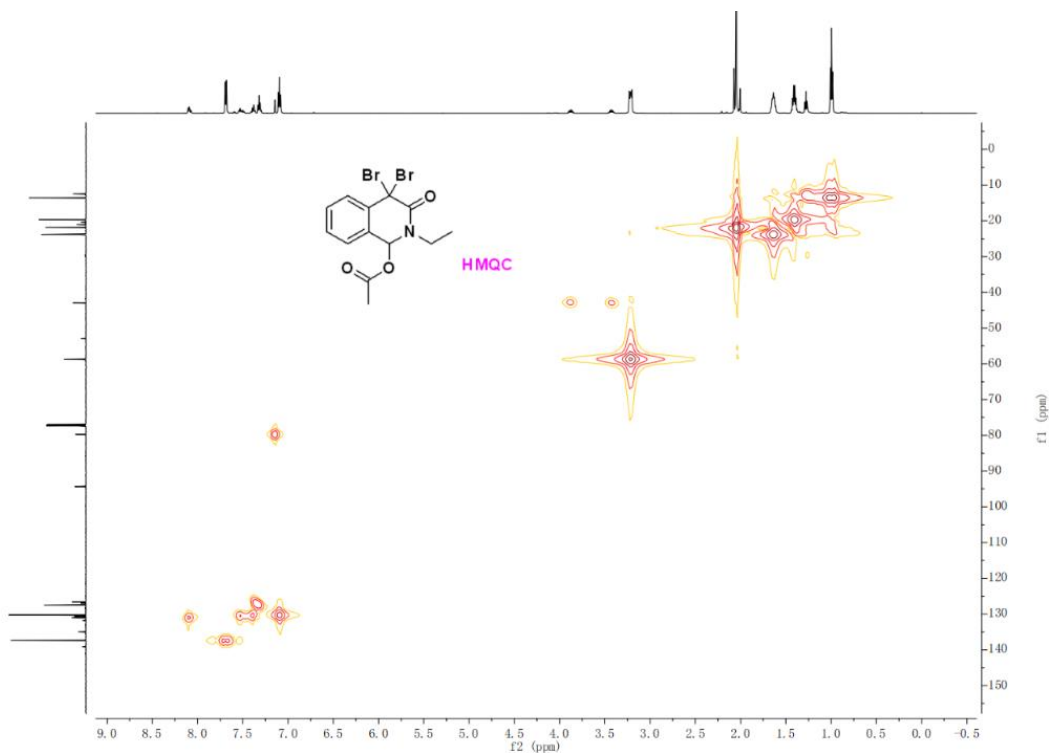

**Figure S3.** *In situ* HMQC of **1T**

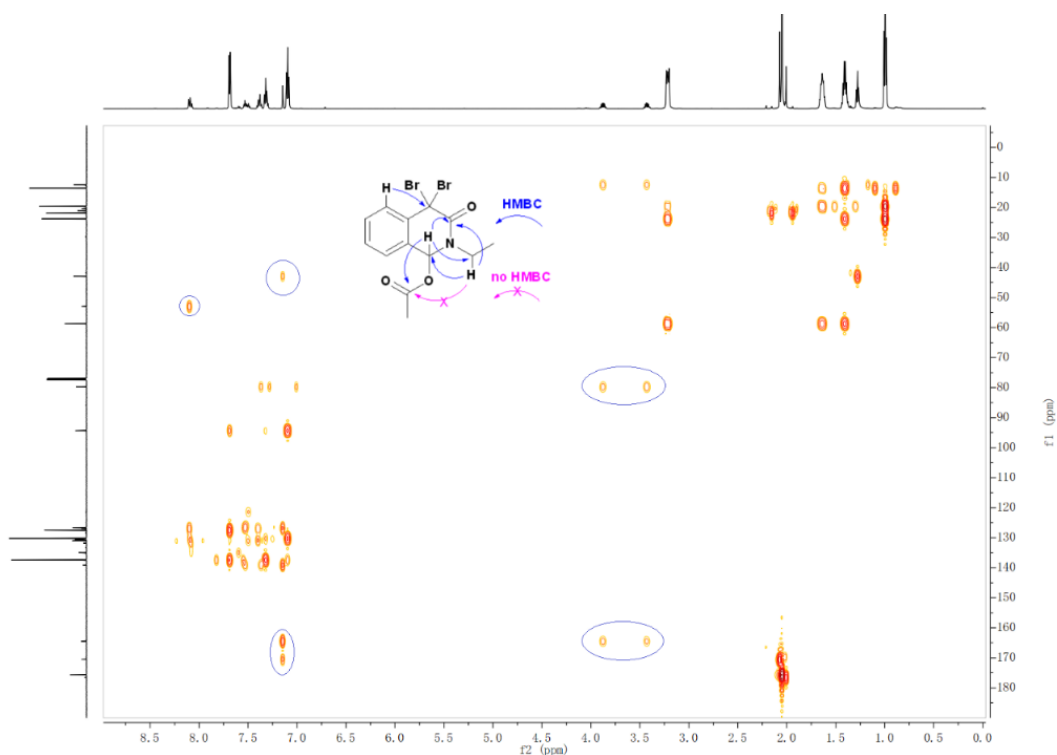

**Figure S4.** *In situ* HMBC of **1T**

**4,4-dibromo-2-ethyl-3-oxo-1,2,3,4-tetrahydroisoquinolin-1-yl acetate (1T):**  $^1\text{H}$  NMR (600 MHz, Chloroform-*d*)  $\delta$  8.10 (d,  $J = 8.3$  Hz, 1H), 7.53 (td,  $J = 8.3, 7.6, 1.8$  Hz, 1H), 7.41 – 7.38 (m, 1H), 7.37 (d,  $J = 5.9$  Hz, 1H), 7.15 (s, 1H), 3.88 (dq,  $J = 14.3, 7.2$  Hz, 1H), 3.43 (dq,  $J = 14.3, 7.2$  Hz, 1H), 2.07 (s, 3H),

1.28 (t,  $J = 7.2$  Hz, 3H).  $^{13}\text{C}$  NMR (151 MHz, Chloroform- $d$ )  $\delta$  170.56, 164.48, 139.12, 134.94, 130.97, 130.64, 126.96, 126.59, 79.75, 52.99, 42.92, 21.09, 12.44. HRMS (ESI-TOF) calcd for  $\text{C}_{13}\text{H}_{13}\text{Br}_2\text{NNaO}_3$   $[\text{M} + \text{Na}]^+$ : 411.9154; found: 411.9152.

## 2.2 The $^1\text{H}$ NMR spectra of PIDA and its mixture with TBAB

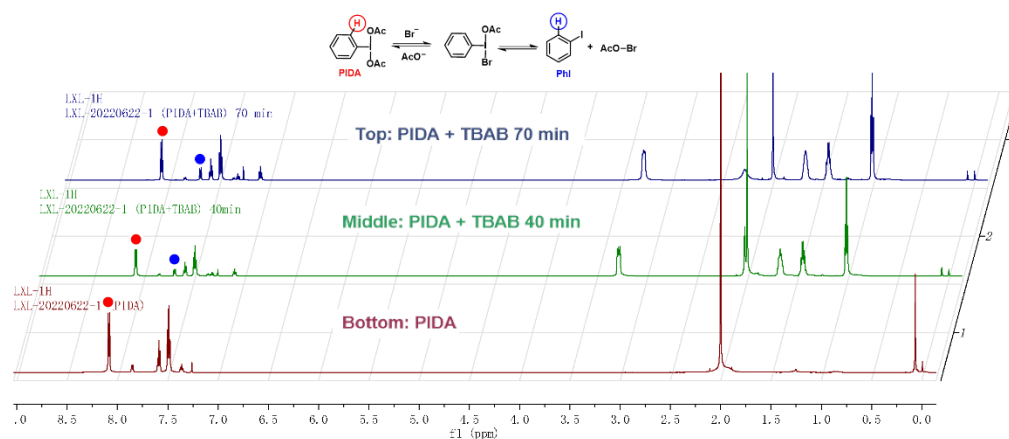

**Figure S5.**  $^1\text{H}$  NMR of PIDA and its mixture with TBAB

**Note:** The ratios of integration (area) of proton signals are: (1) at 40 min, PIDA:PhI = 3.7:1; (2) at 70 min, PIDA:PhI = 3.4:1. At 40 min, 21.3% of PIDA converted to PhI, while at 70 min, 22.7% of PIDA converted to PhI, implying that this conversion slows down rapidly over time.

## 3 Investigations on the mechanism of the PIDA-mediated oxidation

### 3.1 The HRMS spectrum of the reaction mixture

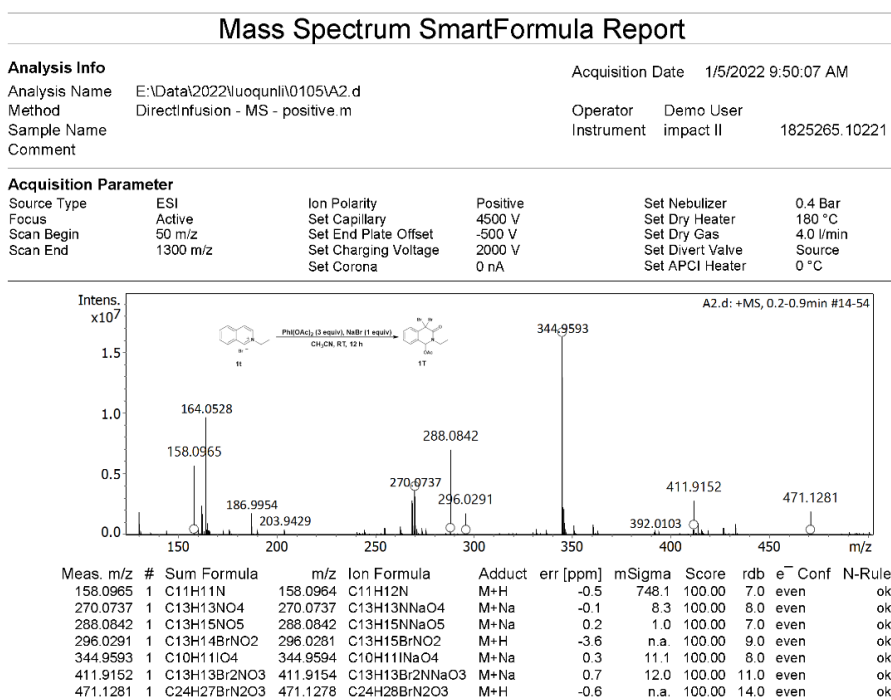

**Figure S6.** The HRMS spectrum of the reaction mixture.

### 3.2 The ESI-MS spectrum of the TEMPO-added reaction mixture

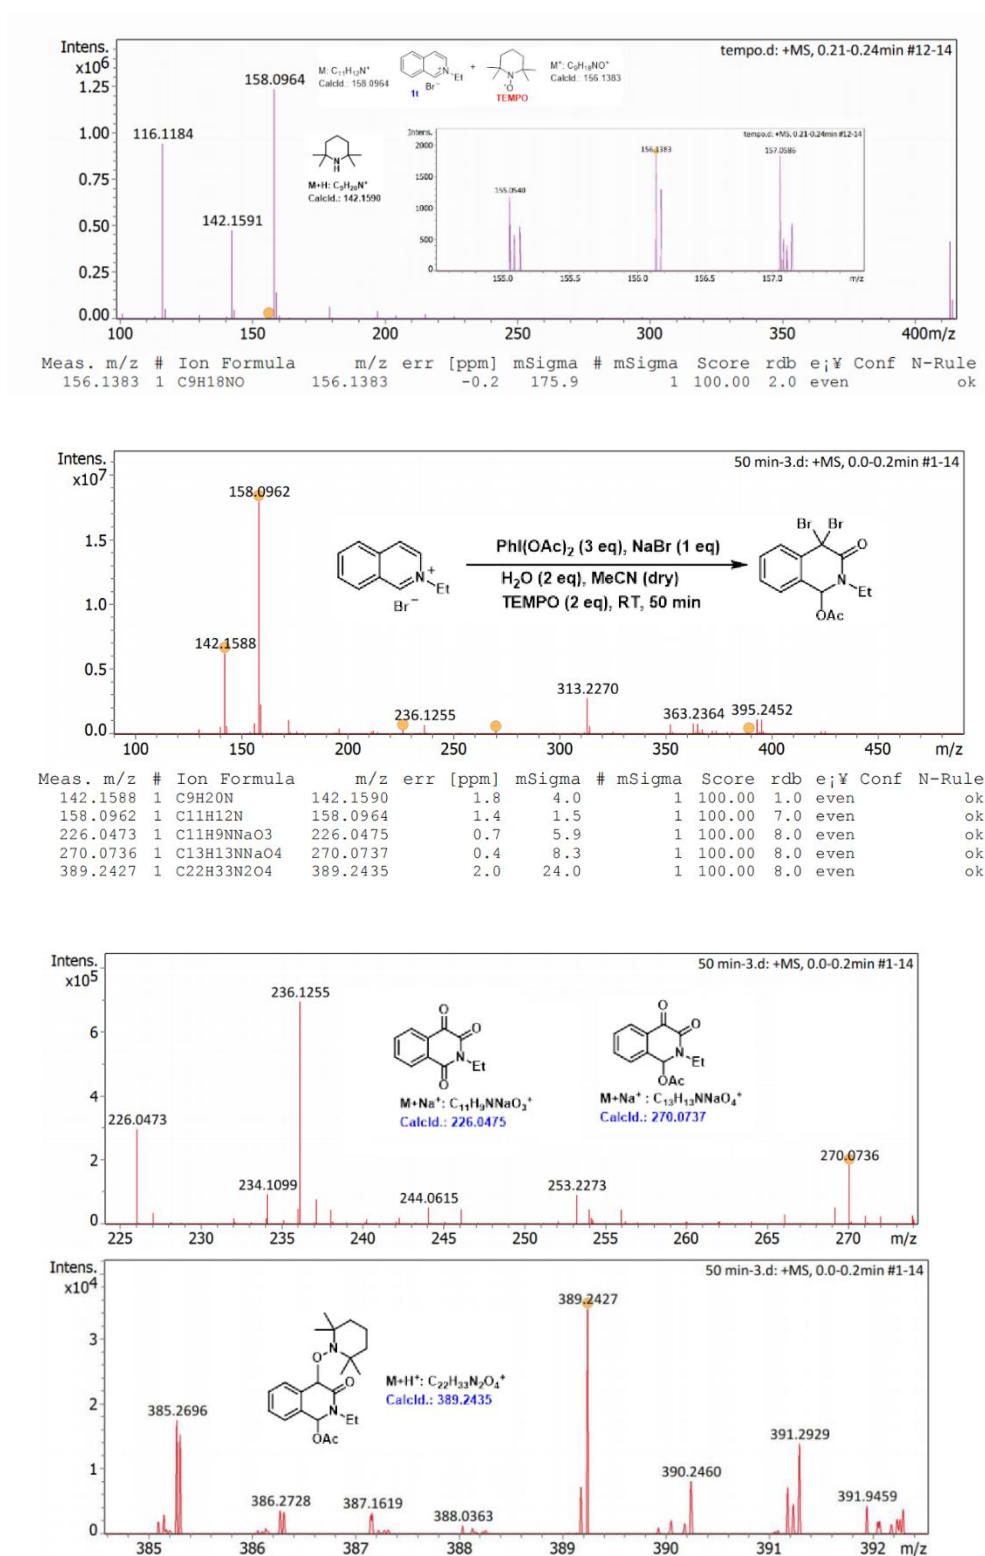

Figure S7. The HRMS spectra of the TEMPO-added reaction mixture.

### 3.3 The NMR spectra and characterization data of (1,2-dibromoethyl)benzene

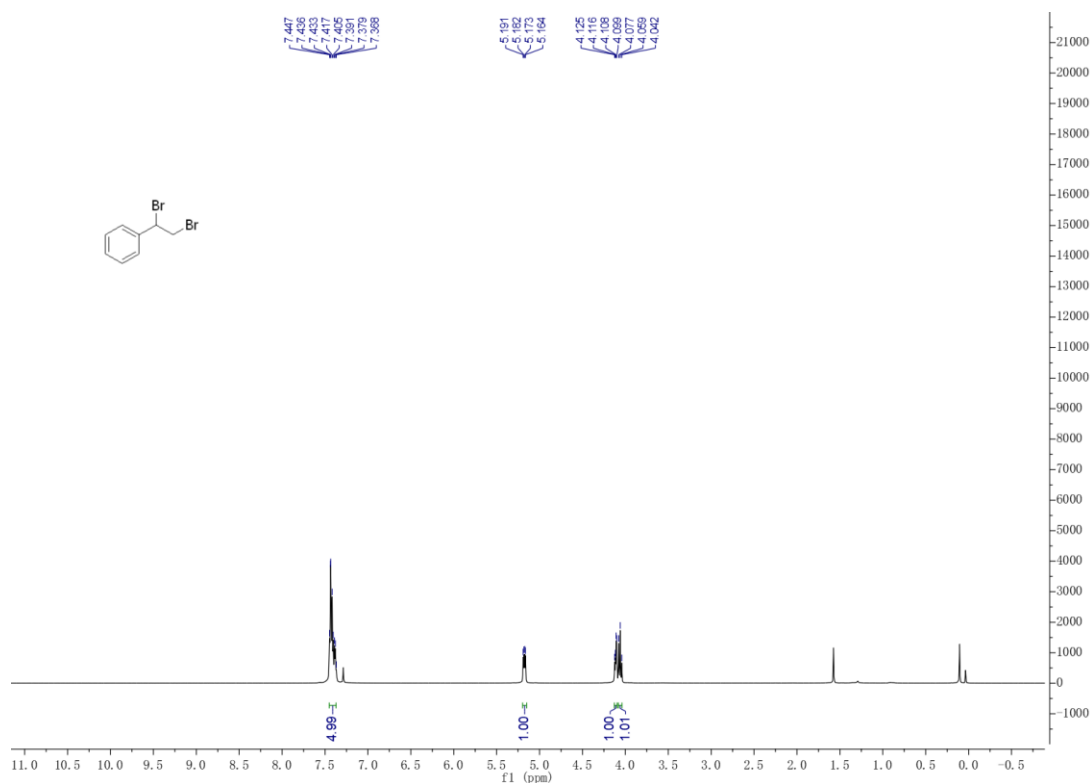

Figure S8.  $^1\text{H}$  NMR of (1,2-dibromoethyl)benzene

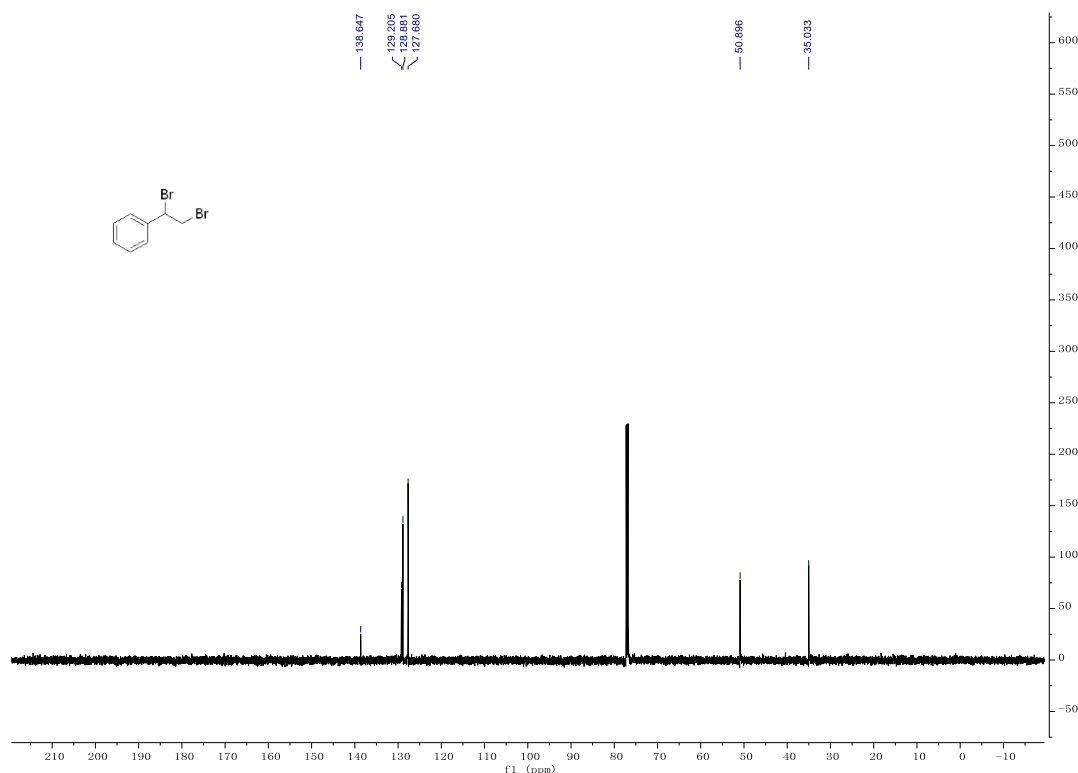

Figure S9.  $^{13}\text{C}$  NMR of (1,2-dibromoethyl)benzene

Characterization data of (1,2-dibromoethyl)benzene:<sup>[1]</sup> Purification by flash column chromatography eluting with petroleum ether gave as white solid (16mg, 30%).  $^1\text{H}$  NMR (600 MHz, Chloroform-*d*)  $\delta$  7.46 – 7.36 (m, 5H), 5.18 (dd,  $J = 10.7, 5.3$  Hz, 1H), 4.11 (dd,  $J = 10.3, 5.3$  Hz, 1H),

4.06 (t,  $J = 10.5$  Hz, 1H).  $^{13}\text{C}$  NMR (151 MHz, Chloroform- $d$ )  $\delta$  138.65, 129.21, 128.88, 127.68, 50.90, 35.03.

### 3.4 Possible reaction pathway for the PIDA-mediated oxidation

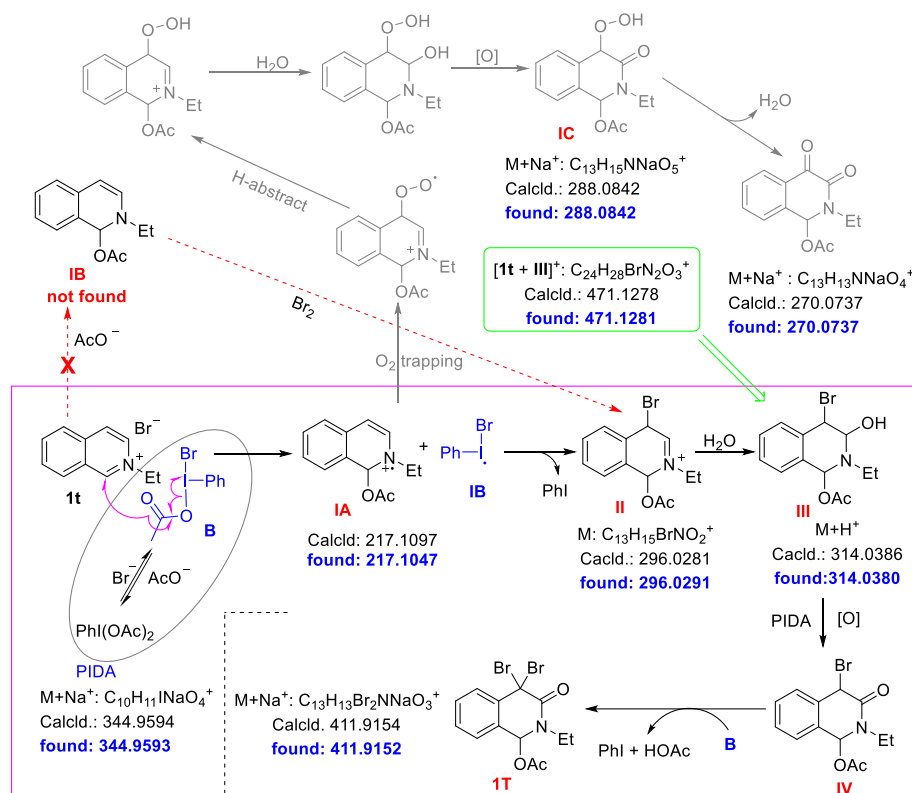

**Scheme S1.** Possible reaction pathway for the PIDA-mediated oxidation

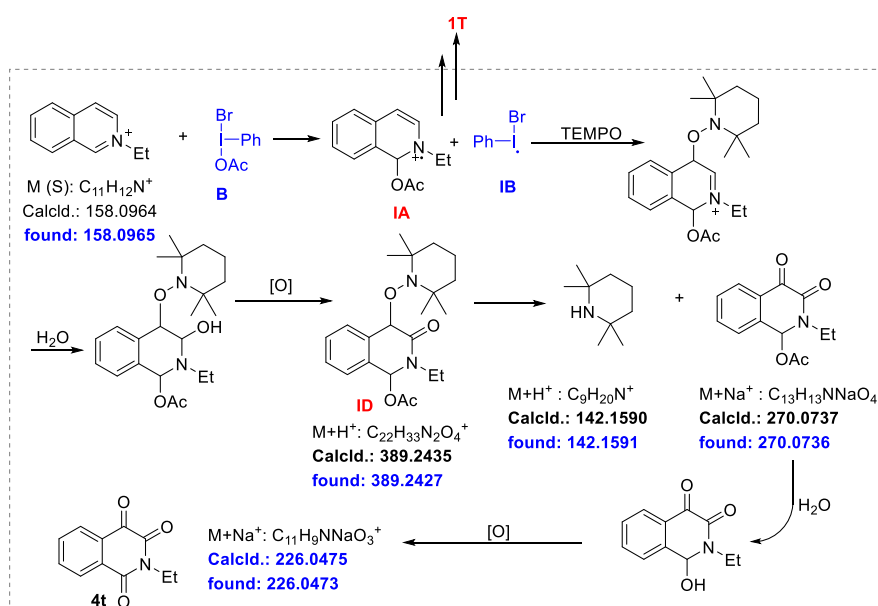

**Scheme S2.** Possible reaction pathway for the TEMPO-added oxidation



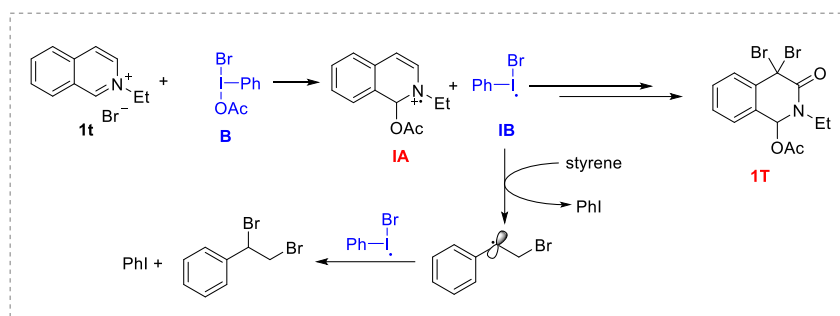

**Scheme S3.** Possible reaction pathway for the styrene-added oxidation

## 4 Crystallographic data of 3a

**Table S1** Crystal data and structure refinement for **3a**.

|                                             |                                                               |
|---------------------------------------------|---------------------------------------------------------------|
| Empirical formula                           | C <sub>25</sub> H <sub>16</sub> BrNO <sub>4</sub>             |
| Formula weight                              | 474.30                                                        |
| Temperature/K                               | 292.00(10)                                                    |
| Crystal system                              | monoclinic                                                    |
| Space group                                 | P2 <sub>1</sub> /c                                            |
| a/Å                                         | 9.50407(12)                                                   |
| b/Å                                         | 13.07175(19)                                                  |
| c/Å                                         | 16.7222(2)                                                    |
| α/°                                         | 90                                                            |
| β/°                                         | 100.3725(13)                                                  |
| γ/°                                         | 90                                                            |
| Volume/Å <sup>3</sup>                       | 2043.53(5)                                                    |
| Z                                           | 4                                                             |
| ρ <sub>calc</sub> /cm <sup>3</sup>          | 1.542                                                         |
| μ/mm <sup>-1</sup>                          | 3.024                                                         |
| F(000)                                      | 960.0                                                         |
| Crystal size/mm <sup>3</sup>                | 0.31 × 0.28 × 0.24                                            |
| Radiation                                   | CuKα (λ = 1.54184)                                            |
| 2θ range for data collection/°              | 8.64 to 143.728                                               |
| Index ranges                                | -11 ≤ h ≤ 11, -15 ≤ k ≤ 11, -20 ≤ l ≤ 20                      |
| Reflections collected                       | 19329                                                         |
| Independent reflections                     | 3926 [R <sub>int</sub> = 0.0377, R <sub>sigma</sub> = 0.0202] |
| Data/restraints/parameters                  | 3926/0/280                                                    |
| Goodness-of-fit on F <sup>2</sup>           | 1.129                                                         |
| Final R indexes [I >= 2σ (I)]               | R <sub>1</sub> = 0.0993, wR <sub>2</sub> = 0.2526             |
| Final R indexes [all data]                  | R <sub>1</sub> = 0.1065, wR <sub>2</sub> = 0.2595             |
| Largest diff. peak/hole / e Å <sup>-3</sup> | 2.40/-2.09                                                    |

**Table S2.** Bond lengths [Å] for **3a**.

| Atom | Atom | Length/Å  | Atom | Atom | Length/Å  |
|------|------|-----------|------|------|-----------|
| Br1  | C17  | 1.938(6)  | C8   | C9   | 1.437(7)  |
| O1   | C9   | 1.207(7)  | C8   | C10  | 1.510(7)  |
| O2   | C1   | 1.366(7)  | C10  | C11  | 1.510(7)  |
| O2   | C9   | 1.370(7)  | C11  | C12  | 1.378(9)  |
| O3   | C7   | 1.353(6)  | C11  | C16  | 1.407(9)  |
| O3   | C17  | 1.464(7)  | C12  | C13  | 1.421(15) |
| O4   | C18  | 1.219(7)  | C13  | C14  | 1.333(18) |
| N1   | C10  | 1.469(7)  | C14  | C15  | 1.367(17) |
| N1   | C18  | 1.341(8)  | C15  | C16  | 1.387(8)  |
| N1   | C19  | 1.467(6)  | C16  | C17  | 1.480(9)  |
| C1   | C2   | 1.397(7)  | C17  | C18  | 1.537(8)  |
| C1   | C6   | 1.380(7)  | C19  | C20  | 1.502(8)  |
| C2   | C3   | 1.368(9)  | C20  | C21  | 1.383(8)  |
| C3   | C4   | 1.368(10) | C20  | C25  | 1.391(9)  |
| C4   | C5   | 1.375(9)  | C21  | C22  | 1.372(9)  |
| C5   | C6   | 1.404(8)  | C22  | C23  | 1.359(10) |
| C6   | C7   | 1.443(7)  | C23  | C24  | 1.356(10) |
| C7   | C8   | 1.344(7)  | C24  | C25  | 1.380(10) |

**Table S3.** Bond Angles for **3a**

| Atom | Atom | Atom | Angle/°  | Atom | Atom | Atom | Angle/°   |
|------|------|------|----------|------|------|------|-----------|
| C1   | O2   | C9   | 121.0(4) | C12  | C11  | C16  | 120.7(6)  |
| C7   | O3   | C17  | 121.8(4) | C16  | C11  | C10  | 115.1(5)  |
| C18  | N1   | C10  | 119.2(4) | C11  | C12  | C13  | 118.4(9)  |
| C18  | N1   | C19  | 120.5(5) | C14  | C13  | C12  | 119.3(9)  |
| C19  | N1   | C10  | 119.3(5) | C13  | C14  | C15  | 123.7(10) |
| O2   | C1   | C2   | 116.4(5) | C14  | C15  | C16  | 118.6(10) |
| O2   | C1   | C6   | 121.8(4) | C11  | C16  | C17  | 114.0(5)  |
| C6   | C1   | C2   | 121.8(5) | C15  | C16  | C11  | 119.2(7)  |
| C3   | C2   | C1   | 118.3(6) | C15  | C16  | C17  | 126.7(7)  |
| C4   | C3   | C2   | 121.1(5) | O3   | C17  | Br1  | 100.7(4)  |
| C3   | C4   | C5   | 120.7(6) | O3   | C17  | C16  | 111.1(5)  |
| C4   | C5   | C6   | 120.0(6) | O3   | C17  | C18  | 108.6(5)  |
| C1   | C6   | C5   | 118.0(5) | C16  | C17  | Br1  | 113.5(4)  |
| C1   | C6   | C7   | 117.4(4) | C16  | C17  | C18  | 112.4(5)  |
| C5   | C6   | C7   | 124.6(5) | C18  | C17  | Br1  | 109.9(4)  |
| O3   | C7   | C6   | 113.0(4) | O4   | C18  | N1   | 125.0(6)  |
| C8   | C7   | O3   | 126.0(4) | O4   | C18  | C17  | 122.5(6)  |
| C8   | C7   | C6   | 121.1(4) | N1   | C18  | C17  | 112.5(5)  |
| C7   | C8   | C9   | 119.6(4) | N1   | C19  | C20  | 112.4(4)  |
| C7   | C8   | C10  | 121.7(4) | C21  | C20  | C19  | 121.4(6)  |

|     |     |     |          |     |     |     |          |
|-----|-----|-----|----------|-----|-----|-----|----------|
| C9  | C8  | C10 | 118.6(4) | C21 | C20 | C25 | 117.4(5) |
| O1  | C9  | O2  | 116.0(5) | C25 | C20 | C19 | 121.2(5) |
| O1  | C9  | C8  | 125.0(5) | C22 | C21 | C20 | 120.8(6) |
| O2  | C9  | C8  | 119.0(5) | C23 | C22 | C21 | 120.8(6) |
| N1  | C10 | C8  | 110.4(4) | C24 | C23 | C22 | 119.8(6) |
| N1  | C10 | C11 | 109.6(4) | C23 | C24 | C25 | 120.3(6) |
| C8  | C10 | C11 | 108.5(4) | C24 | C25 | C20 | 120.8(6) |
| C12 | C11 | C10 | 124.1(7) |     |     |     |          |

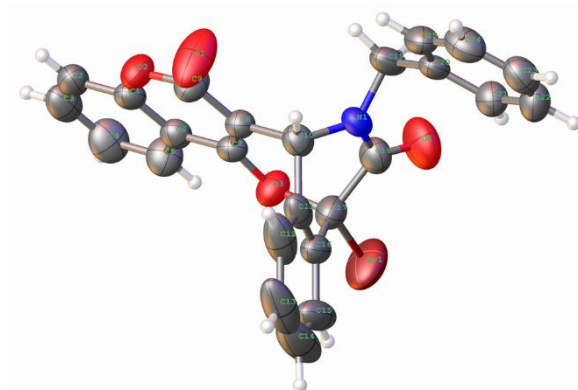

Figure S10. ORTEP drawing of **3a** with thermal ellipsoids at 50 % probability.

## 5 Syntheses of compounds 1-6

### 5.1 General procedure for the syntheses of **1**

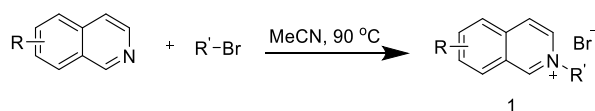

*N*-alkyl iminium salt **1** was prepared according to the literature procedure.<sup>[2]</sup> An oven-dried flask was charged with CH<sub>3</sub>CN (10 mL), Isoquinoline (3 mmol) and alkyl halide (3.3 mmol). The reaction mixture was refluxed until the Isoquinoline was consumed as indicated by TLC. Then it was cooled to room temperature, and concentrated under reduced pressure. The residue was diluted with diethyl ether, and the iminium salt was precipitated quickly. The solid was washed with diethyl ether to give purified **1**. If the iminium salt could not be precipitated, the residue was thoroughly washed with diethyl ether by ultrasonic vibration. Normally, washing three times will lead to the purified salt.

### 5.2 General procedure for the syntheses of **2**

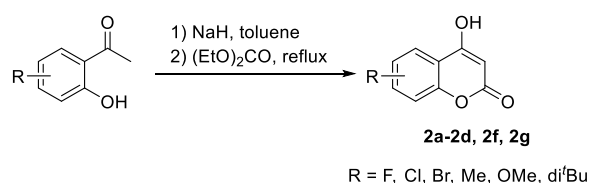

4-Hydroxy-2H-chromen-2-one (**2**) was prepared according to the literature procedure.<sup>[3]</sup> NaH (50 mmol, 5 equiv) in 40 mL toluene was cooled in an ice bath. To the suspension was added 2'-hydroxyacetophenone (10 mmol, 1 equiv) in one portion and the result mixture was allowed to warm to room temperature and stirred for 30 min. Then diethyl carbonate (15 mmol, 1.5 equiv) was added to the reaction mixture at room temperature by drop-wise. The reaction was heated to reflux and stirred for 4 h. On completing of the reaction monitored by TLC, the reaction was allowed to cool to room temperature and the precipitate was collected and washed with 1N HCl solution and water to give the crude product. It was further purified by column chromatography to give the desired 4-hydroxycoumarin **2** as a white solid.

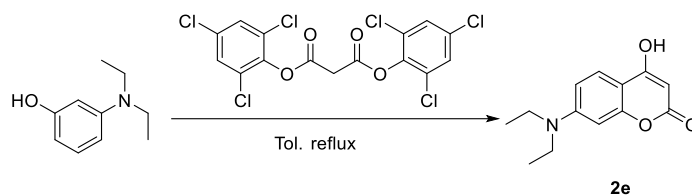

Prepared according to a reported literature.<sup>[4]</sup> A solution of bis(2,4,6-trichlorophenyl) malonate (0.92 g, 2 mmol) and 3-(diethylamino)phenol (0.34 g, 2 mmol) in 5 mL toluene was heated to reflux for 5 h. After cooling down, the precipitation was collected and washed with cold toluene and hexane to afford the desired compound **2e** (317 mg, 68%) as a gray solid.

### 5.3 General procedure for the syntheses of **3**

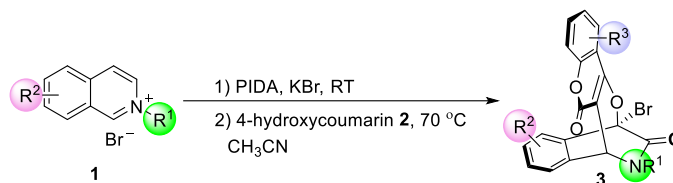

Under an argon atmosphere, a 5 mL Schlenk flask was charged with iminium salt **1** (0.2 mmol), PIDA (0.6 mmol), KBr (0.2 mmol), H<sub>2</sub>O (7  $\mu$ L), and dry MeCN (2 mL). The mixture was continually stirred at room temperature until **1** was consumed as indicated by thin-layer chromatography (TLC, typically, for 8 h). 4-Hydroxycoumarin **2** (0.4 mmol) was added. The reaction mixture was heated at 70 °C in the oil bath until the intermediate was consumed as indicated by TLC (typically, for 8 h), then cooled to room temperature, diluted with water (5 mL), and extracted with ethyl acetate (3  $\times$  5 mL). The combined organic layer was washed with brine, dried over Na<sub>2</sub>SO<sub>4</sub>, filtered, and concentrated under reduced pressure. The crude product was purified by column chromatography on silica gel (petroleum ether/ethyl acetate as the eluent) to give the desired product **3**.

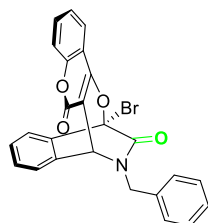

**15-benzyl-12-bromo-7,12-dihydro-6H-7,12-(epiminomethano)benzo[5,6]oxepino[3,2-c]chromene-6,14-dione (3a)**. Purification by flash column chromatography eluting with petroleum ether/ethyl acetate (8/1, v/v) gave **3a** as a white solid (68mg, 72%). mp 172 - 174 °C. <sup>1</sup>H NMR (600 MHz, Chloroform-*d*)  $\delta$  8.05 (d, *J* = 7.8 Hz, 1H), 7.72 (d, *J* = 8.0 Hz, 1H), 7.49 (t, *J* = 8.0 Hz, 1H), 7.45

(t,  $J = 7.7$  Hz, 1H), 7.36 (t,  $J = 7.5$  Hz, 1H), 7.25 (s, 5H), 7.22 (d,  $J = 7.7$  Hz, 1H), 7.19 (d,  $J = 8.3$  Hz, 1H), 7.17 (d,  $J = 7.5$  Hz, 1H), 5.49 (s, 1H), 5.03 (d,  $J = 14.7$  Hz, 1H), 4.62 (d,  $J = 14.7$  Hz, 1H).  $^{13}\text{C}$  NMR (151 MHz, Chloroform-*d*)  $\delta$  162.27, 160.63, 159.24, 152.68, 138.97, 135.08, 132.90, 131.75, 131.46, 130.19, 129.34, 128.81, 128.54, 128.18, 124.37, 123.04, 122.31, 116.65, 114.96, 106.29, 97.88, 52.94, 50.73. HRMS (ESI-TOF) calcd for  $\text{C}_{25}\text{H}_{16}\text{BrNO}_4$  [ $\text{M} + \text{Na}$ ] $^+$ : 496.0155; found: 496.0151.

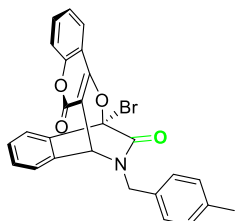

**12-bromo-15-(4-methylbenzyl)-7,12-dihydro-6H-7,12-**

**(epiminomethano)benzo[5,6]oxepino[3,2-c]chromene-6,14-dione (3b).** Purification by flash column chromatography eluting with petroleum ether/ethyl acetate (8/1, v/v) gave **3b** as a white solid (48mg, 49%). mp 197 – 199 °C  $^1\text{H}$  NMR (600 MHz, Chloroform-*d*)  $\delta$  8.05 (d,  $J = 7.8$  Hz, 1H), 7.75 – 7.72 (m, 1H), 7.53 – 7.49 (m, 1H), 7.45 (t,  $J = 7.6$  Hz, 1H), 7.37 (t,  $J = 7.5$  Hz, 1H), 7.26 – 7.17 (m, 2H), 7.17 – 7.13 (m, 2H), 7.06 (d,  $J = 7.6$  Hz, 2H), 5.48 (s, 1H), 5.01 (d,  $J = 14.5$  Hz, 1H), 4.55 (d,  $J = 14.6$  Hz, 1H), 2.28 (s, 3H).  $^{13}\text{C}$  NMR (151 MHz, Chloroform-*d*)  $\delta$  162.22, 160.69, 159.24, 152.71, 139.02, 137.92, 132.86, 131.78, 130.16, 129.46, 129.28, 128.52, 124.36, 123.06, 122.31, 116.61, 115.02, 106.31, 97.91, 52.79, 50.45, 21.11. HRMS (ESI-TOF) calcd for  $\text{C}_{26}\text{H}_{18}\text{BrNO}_4$  [ $\text{M} + \text{H}$ ] $^+$ : 488.0492; found: 488.0487.

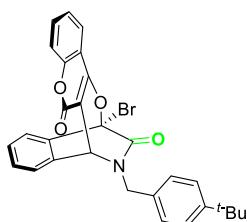

**12-bromo-15-(4-(tert-butyl)benzyl)-7,12-dihydro-6H-7,12-**

**(epiminomethano)benzo[5,6]oxepino[3,2-c]chromene-6,14-dione (3c).** Purification by flash column chromatography eluting with petroleum ether/ethyl acetate (8/1, v/v) gave **3c** as a white solid (73mg, 69%). mp 196 – 198 °C.  $^1\text{H}$  NMR (600 MHz, Chloroform-*d*)  $\delta$  8.05 (d,  $J = 7.8$  Hz, 1H), 7.73 (dd,  $J = 8.0, 1.6$  Hz, 1H), 7.50 (td,  $J = 7.8$  Hz, 1.4 Hz, 1H), 7.45 (td,  $J = 7.8$  Hz, 1.2 Hz, 1H), 7.38 (td,  $J = 7.8$  Hz, 1.2 Hz, 1H), 7.26 – 7.21 (m, 3H), 7.21–7.17 (m, 4H), 5.50 (s, 1H), 4.91 (d,  $J = 15.0$  Hz, 1H), 4.69 (d,  $J = 14.4$  Hz, 1H), 1.24 (s, 9H).  $^{13}\text{C}$  NMR (151 MHz, Chloroform-*d*)  $\delta$  162.30, 160.54, 159.07, 152.63, 151.16, 139.02, 132.77, 132.16, 131.72, 131.42, 130.19, 129.28, 128.24, 125.64, 124.31, 123.03, 122.33, 116.58, 114.99, 106.50, 97.89, 53.07, 50.54, 34.51, 31.22. HRMS (ESI-TOF) calcd for  $\text{C}_{29}\text{H}_{24}\text{BrNO}_4$  [ $\text{M} + \text{Na}$ ] $^+$ : 552.0781; found: 552.0778.

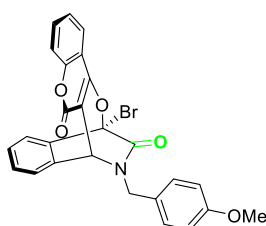

**12-bromo-15-(4-methoxybenzyl)-7,12-dihydro-6H-7,12-**

**(epiminomethano)benzo[5,6]oxepino[3,2-c]chromene-6,14-dione (3d).** Purification by flash column chromatography eluting with petroleum ether/ethyl acetate (8/1, v/v) gave **3d** as a white solid (66mg, 65%). mp 229 - 231 °C. <sup>1</sup>H NMR (600 MHz, Chloroform-*d*) δ 8.05 (d, *J* = 7.8 Hz, 1H), 7.73 (dd, *J* = 8.0, 1.6 Hz, 1H), 7.53 – 7.49 (m, 1H), 7.44 (td, *J* = 7.7, 1.2 Hz, 1H), 7.38 – 7.35 (m, 1H), 7.21 (d, *J* = 8.3 Hz, 3H), 7.17 (d, *J* = 7.5 Hz, 2H), 6.78 (d, *J* = 8.5 Hz, 2H), 5.49 (s, 1H), 4.97 (d, *J* = 14.6 Hz, 1H), 4.54 (d, *J* = 14.6 Hz, 1H), 3.76 (s, 3H). <sup>13</sup>C NMR (151 MHz, Chloroform-*d*) δ 162.15, 160.70, 159.53, 159.23, 152.70, 139.02, 132.85, 131.79, 131.41, 130.15, 130.01, 129.27, 127.12, 124.36, 123.05, 122.30, 116.64, 115.02, 114.21, 106.32, 97.93, 55.25, 52.66, 50.17. HRMS (ESI-TOF) calcd for C<sub>26</sub>H<sub>18</sub>BrNO<sub>5</sub> [M + Na]<sup>+</sup>: 526.0261; found: 526.0258.

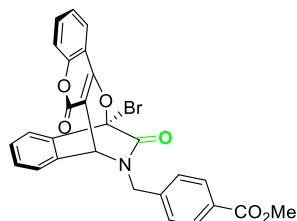

**Methyl 4-((-12-bromo-6,14-dioxo-7,12-dihydro-6H-7,12-(epiminomethano)benzo[5,6]oxepino[3,2-c]chromen-15-yl)methyl)benzoate (3e).** Purification by flash column chromatography eluting with petroleum ether/ethyl acetate (8/1, v/v) gave **3e** as a white solid (68mg, 64%). mp 210 - 212 °C. <sup>1</sup>H NMR (600 MHz, Chloroform-*d*) δ 8.07 (dd, *J* = 7.8, 1.2 Hz, 1H), 7.94 (d, *J* = 8.3 Hz, 2H), 7.74 (dd, *J* = 8.1, 1.6 Hz, 1H), 7.52 (td, *J* = 8.0, 7.3, 1.6 Hz, 1H), 7.47 (td, *J* = 7.7, 1.3 Hz, 1H), 7.39 (td, *J* = 7.6, 1.2 Hz, 1H), 7.32 (d, *J* = 8.0 Hz, 2H), 7.27 (dd, *J* = 5.8, 2.3 Hz, 1H), 7.22 (d, *J* = 8.4 Hz, 1H), 7.18 (dd, *J* = 7.5, 1.3 Hz, 1H), 5.47 (s, 1H), 5.13 (d, *J* = 15.1 Hz, 1H), 4.62 (d, *J* = 15.1 Hz, 1H), 3.89 (s, 3H). <sup>13</sup>C NMR (151 MHz, Chloroform-*d*) δ 166.60, 162.40, 160.73, 159.40, 152.71, 140.19, 138.75, 133.06, 131.66, 131.59, 130.26, 130.13, 130.04, 129.48, 128.33, 124.48, 123.07, 122.32, 116.74, 114.90, 106.02, 97.64, 53.26, 52.13, 50.41. HRMS (ESI-TOF) calcd for C<sub>27</sub>H<sub>18</sub>BrNO<sub>6</sub> [M + Na]<sup>+</sup>: 554.0210; Found: 554.0207

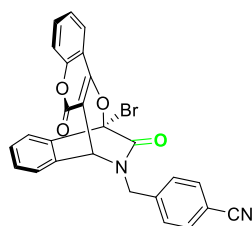

**4-((-12-bromo-6,14-dioxo-7,12-dihydro-6H-7,12-(epiminomethano)benzo[5,6]oxepino[3,2-c]chromen-15-yl)methyl)benzonitrile (3f).** Purification by flash column chromatography eluting with petroleum ether/ethyl acetate (8/1, v/v) gave **3f** as a white solid (49mg, 49%). mp 230 - 232 °C. <sup>1</sup>H NMR (600 MHz, Chloroform-*d*) δ 8.07 (d, *J* = 7.8 Hz, 1H), 7.74 (d, *J* = 7.9 Hz, 1H), 7.57 (td, *J* = 8.1, 2.1 Hz, 2H), 7.49 (td, *J* = 7.8, 1.4 Hz, 1H), 7.42 (t, *J* = 7.8 Hz, 1H), 7.38 (d, *J* = 8.4 Hz, 2H), 7.29 – 7.21 (m, 4H), 5.46 (s, 1H), 5.05 (d, *J* = 15.0 Hz, 1H), 4.69 (d, *J* = 15.0 Hz, 1H). <sup>13</sup>C NMR (151 MHz, Chloroform-*d*) δ 162.54, 160.72, 159.45, 152.71, 140.60, 138.54, 133.23, 132.64, 131.71, 131.56, 130.35, 129.63, 129.05, 124.57, 123.07, 122.32, 118.35, 116.79, 114.80, 112.24, 105.91, 97.40, 53.64, 50.53. HRMS (ESI-TOF) calcd for C<sub>26</sub>H<sub>15</sub>BrN<sub>2</sub>O<sub>4</sub> [M + Na]<sup>+</sup>: 521.0107; found: 521.0105.

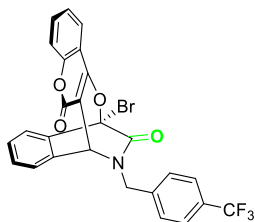

**12-bromo-15-(4-(trifluoromethyl)benzyl)-7,12-dihydro-6H-7,12-(epiminomethano)benzo[5,6]oxepino[3,2-c]chromene-6,14-dione (3g).** Purification by flash column chromatography eluting with petroleum ether/ethyl acetate (8/1, v/v) gave **3g** as a white solid (46mg, 42%). mp 181 - 183 °C. <sup>1</sup>H NMR (600 MHz, Chloroform-*d*) δ 8.10 (d, *J* = 7.8 Hz, 1H), 7.76 (dd, *J* = 7.9, 1.7 Hz, 1H), 7.54 (d, *J* = 7.8 Hz, 3H), 7.50 (t, *J* = 7.8 Hz, 1H), 7.42 (t, *J* = 7.2 Hz, 3H), 7.30 – 7.27 (m, 1H), 7.24 (d, *J* = 7.8 Hz, 2H), 5.50 (s, 1H), 5.11 (d, *J* = 15.0 Hz, 1H), 4.69 (d, *J* = 15.0 Hz, 1H). <sup>13</sup>C NMR (151 MHz, Chloroform-*d*) δ 162.49, 160.72, 159.38, 152.71, 139.28, 138.66, 133.09, 131.63, 130.47 (q, *J* = 33.2 Hz), 130.29, 129.53, 128.71, 125.80 (d, *J* = 3.8 Hz), 124.48, 123.9 (q, *J* = 272.2 Hz), 123.03, 122.34, 116.73, 114.85, 106.01, 97.54, 53.45, 50.36. <sup>19</sup>F NMR (565 MHz, Chloroform-*d*) δ -62.72. HRMS (ESI-TOF) calcd for C<sub>26</sub>H<sub>15</sub>BrF<sub>3</sub>NO<sub>4</sub> [M + Na]<sup>+</sup>: 564.0029; found: 564.0025.

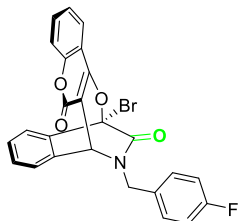

**12-bromo-15-(4-fluorobenzyl)-7,12-dihydro-6H-7,12-(epiminomethano)benzo[5,6]oxepino[3,2-c]chromene-6,14-dione (3h).** Purification by flash column chromatography eluting with petroleum ether/ethyl acetate (8/1, v/v) gave **3h** as a white solid (48mg, 49%). mp 182 - 184 °C. <sup>1</sup>H NMR (600 MHz, Chloroform-*d*) δ 8.06 (d, *J* = 7.8 Hz, 1H), 7.73 (d, *J* = 7.8 Hz, 1H), 7.52 (t, *J* = 7.8 Hz, 1H), 7.46 (t, *J* = 7.8 Hz, 1H), 7.38 (t, *J* = 7.5 Hz, 1H), 7.29 – 7.23 (m, 3H), 7.20 (dd, *J* = 15.6, 7.8 Hz, 2H), 6.95 (t, *J* = 8.4 Hz, 2H), 5.48 (s, 1H), 4.98 (d, *J* = 15.0 Hz, 1H), 4.60 (d, *J* = 14.4 Hz, 1H). <sup>13</sup>C NMR (151 MHz, Chloroform-*d*) δ 162.60 (d, *J* = 3.3 Hz), 162.26, 160.71, 159.31, 152.69, 138.83, 133.00, 131.69, 131.52, 130.98 (d, *J* = 3.3 Hz), 130.40 (d, *J* = 8.2 Hz), 130.22, 129.41, 124.44, 123.04, 122.28, 116.71, 115.84, 115.70, 114.91, 106.15, 97.74, 52.96, 50.06. <sup>19</sup>F NMR (565 MHz, Chloroform-*d*) δ -113.59. HRMS (ESI-TOF) calcd for C<sub>25</sub>H<sub>15</sub>BrFNO<sub>4</sub> [M + H]<sup>+</sup>: 492.0241; found: 492.0236.

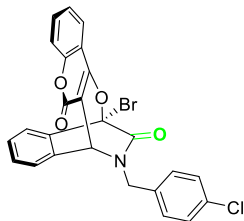

**12-bromo-15-(4-chlorobenzyl)-7,12-dihydro-6H-7,12-(epiminomethano)benzo[5,6]oxepino[3,2-c]chromene-6,14-dione (3i).** Purification by flash column chromatography eluting with petroleum ether/ethyl acetate (8/1, v/v) gave **3i** as a white solid (53mg, 52%). mp 228 - 230 °C. <sup>1</sup>H NMR (600 MHz, Chloroform-*d*) δ 8.06 (dd, *J* = 7.8, 1.2 Hz, 1H), 7.73 (dd, *J* = 7.8, 1.8 Hz, 1H), 7.52 (td, *J* = 7.2, 1.8 Hz, 1H), 7.46 (td, *J* = 7.8, 1.2 Hz, 1H), 7.39 (td, *J* = 7.5, 1.2 Hz, 1H), 7.27 – 7.18 (m, 7H), 5.47 (s,

1H), 5.01 (d,  $J = 15.0$  Hz, 1H), 4.55 (d,  $J = 14.4$  Hz, 1H).  $^{13}\text{C}$  NMR (151 MHz, Chloroform- $d$ )  $\delta$  162.32, 160.75, 159.36, 152.71, 138.77, 134.17, 133.67, 133.03, 131.67, 131.56, 130.23, 129.91, 129.44, 129.02, 124.46, 123.05, 122.32, 116.73, 114.91, 106.08, 97.67, 53.08, 50.10. HRMS (ESI-TOF) calcd for  $\text{C}_{25}\text{H}_{15}\text{BrClNO}_4$   $[\text{M} + \text{H}]^+$ : 507.9946; found: 507.9941.

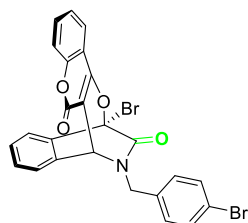

**12-bromo-15-(4-bromobenzyl)-7,12-dihydro-6H-7,12-(epiminomethano)benzo[5,6]oxepino[3,2-c]chromene-6,14-dione (3j).** Purification by flash column chromatography eluting with petroleum ether/ethyl acetate (8/1, v/v) gave **3j** as a white solid (65mg, 59%). mp 231 - 233 °C.  $^1\text{H}$  NMR (600 MHz, Chloroform- $d$ )  $\delta$  8.06 (d,  $J = 7.8$  Hz, 1H), 7.74 (dd,  $J = 7.8, 1.8$  Hz, 1H), 7.53 (td,  $J = 7.8, 1.8$  Hz, 1H), 7.47 (td,  $J = 7.8, 1.2$  Hz, 1H), 7.39 (t,  $J = 6.6$  Hz, 2H), 7.28 - 7.22 (m, 3H), 7.20 (d,  $J = 7.2$  Hz, 1H), 7.15 (d,  $J = 8.4$  Hz, 2H), 5.46 (s, 1H), 5.00 (d,  $J = 15.0$  Hz, 1H), 4.53 (d,  $J = 15.0$  Hz, 1H).  $^{13}\text{C}$  NMR (151 MHz, Chloroform- $d$ )  $\delta$  162.34, 160.75, 159.36, 152.73, 138.76, 134.20, 133.03, 131.99, 131.67, 131.57, 130.23, 130.21, 129.44, 124.46, 123.05, 122.32, 122.30, 116.74, 114.92, 106.07, 97.66, 53.12, 50.16. HRMS (ESI-TOF) calcd for  $\text{C}_{25}\text{H}_{15}\text{Br}_2\text{NO}_4$   $[\text{M} + \text{H}]^+$ : 551.9441; found: 551.9435.

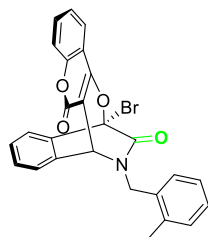

**12-bromo-15-(2-methylbenzyl)-7,12-dihydro-6H-7,12-(epiminomethano)benzo[5,6]oxepino[3,2-c]chromene-6,14-dione (3k).** Purification by flash column chromatography eluting with petroleum ether/ethyl acetate (8/1, v/v) gave **3k** as a white solid (66mg, 67%). mp 170 - 172 °C.  $^1\text{H}$  NMR (600 MHz, Chloroform- $d$ )  $\delta$  8.06 (d,  $J = 8.4$  Hz, 1H), 7.75 (dd,  $J = 8.1, 1.5$  Hz, 1H), 7.51 (td,  $J = 8.1, 1.5$  Hz, 1H), 7.45 (td,  $J = 7.8, 1.6$  Hz, 1H), 7.36 (td,  $J = 7.5, 1.2$  Hz, 1H), 7.26 - 7.19 (m, 3H), 7.19 - 7.13 (m, 2H), 7.12 (d,  $J = 7.8$  Hz, 2H), 5.42 (s, 1H), 5.16 (d,  $J = 15.0$  Hz, 1H), 4.51 (d,  $J = 14.4$  Hz, 1H), 2.19 (s, 3H).  $^{13}\text{C}$  NMR (151 MHz, Chloroform- $d$ )  $\delta$  162.00, 160.66, 159.44, 152.73, 138.89, 137.08, 132.95, 132.58, 131.83, 131.46, 130.75, 130.15, 129.64, 129.34, 128.45, 126.36, 124.41, 123.06, 122.41, 116.70, 115.00, 106.00, 97.88, 52.01, 48.16, 19.10. HRMS (ESI-TOF) calcd for  $\text{C}_{26}\text{H}_{18}\text{BrNO}_4$   $[\text{M} + \text{Na}]^+$ : 510.0311; found: 510.0310.

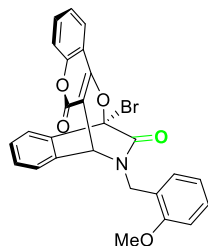

**12-bromo-15-(2-methoxybenzyl)-7,12-dihydro-6H-7,12-(epiminomethano)benzo[5,6]oxepino[3,2-c]chromene-6,14-dione (3l).** Purification by flash



column chromatography eluting with petroleum ether/ethyl acetate (8/1, v/v) gave **3l** as a white solid (70mg, 69%). mp 182 - 184 °C. <sup>1</sup>H NMR (600 MHz, Chloroform-*d*) δ 8.03 (d, *J* = 8.4 Hz, 1H), 7.74 (dd, *J* = 7.8, 1.8 Hz, 1H), 7.49 (td, *J* = 7.8, 1.2 Hz, 1H), 7.43 (td, *J* = 7.8, 1.4 Hz, 1H), 7.37 (td, *J* = 7.8, 1.4 Hz, 1H), 7.25 – 7.21 (m, 4H), 7.19 (d, *J* = 8.4 Hz, 1H), 6.85 (t, *J* = 7.5 Hz, 1H), 6.74 (d, *J* = 8.4 Hz, 1H), 5.59 (s, 1H), 4.86 (d, *J* = 14.4 Hz, 1H), 4.82 (d, *J* = 15.0 Hz, 1H), 3.69 (s, 3H). <sup>13</sup>C NMR (151 MHz, Chloroform-*d*) δ 162.11, 160.32, 158.95, 157.70, 152.62, 139.50, 132.70, 131.80, 131.28, 130.89, 130.18, 129.65, 129.15, 124.29, 123.33, 122.97, 122.21, 120.58, 116.59, 115.12, 110.21, 106.56, 98.21, 55.11, 53.41, 46.70. HRMS (ESI-TOF) calcd for C<sub>26</sub>H<sub>18</sub>BrNO<sub>5</sub> [M + Na]<sup>+</sup>: 526.0261; found: 526.0261.

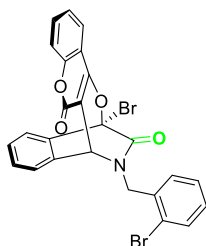

**12-bromo-15-(2-bromobenzyl)-7,12-dihydro-6H-7,12-(epiminomethano)benzo[5,6]oxepino[3,2-c]chromene-6,14-dione (3m).** Purification by flash column chromatography eluting with petroleum ether/ethyl acetate (8/1, v/v) gave **3m** as a white solid (62mg, 56%). mp 206 - 208 °C. <sup>1</sup>H NMR (600 MHz, Chloroform-*d*) δ 8.07 (d, *J* = 7.8 Hz, 1H), 7.75 (dd, *J* = 8.1, 1.5 Hz, 1H), 7.52 (dd, *J* = 11.7, 7.5 Hz, 2H), 7.47 (td, *J* = 7.8, 1.4 Hz, 1H), 7.40 (t, *J* = 7.5 Hz, 1H), 7.28 – 7.20 (m, 5H), 7.17 – 7.14 (m, 1H), 5.51 (s, 1H), 5.08 (d, *J* = 15.2 Hz, 1H), 4.80 (d, *J* = 15.2 Hz, 1H). <sup>13</sup>C NMR (151 MHz, Chloroform-*d*) δ 162.28, 160.47, 159.38, 152.71, 138.97, 134.24, 133.25, 132.96, 131.70, 131.53, 130.59, 130.28, 129.82, 129.43, 127.75, 124.42, 124.10, 123.07, 122.42, 116.69, 115.03, 106.09, 97.79, 53.22, 50.88. HRMS (ESI-TOF) calcd for C<sub>25</sub>H<sub>15</sub>Br<sub>2</sub>NO<sub>4</sub> [M + Na]<sup>+</sup>: 573.9260; found: 573.9255.

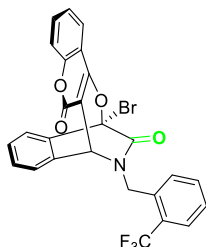

**12-bromo-15-(2-(trifluoromethyl)benzyl)-7,12-dihydro-6H-7,12-(epiminomethano)benzo[5,6]oxepino[3,2-c]chromene-6,14-dione (3n).** Purification by flash column chromatography eluting with petroleum ether/ethyl acetate (8/1, v/v) gave **3n** as a white solid (50mg, 46%). mp 189 - 191 °C. <sup>1</sup>H NMR (600 MHz, Chloroform-*d*) δ 8.10 (d, *J* = 7.8 Hz, 1H), 7.76 (d, *J* = 8.0 Hz, 1H), 7.70 (d, *J* = 7.6 Hz, 1H), 7.51 (dt, *J* = 16.0, 7.8 Hz, 2H), 7.42 (t, *J* = 7.6 Hz, 1H), 7.38 (t, *J* = 7.7 Hz, 1H), 7.35 (t, *J* = 7.6 Hz, 1H), 7.28 – 7.24 (m, 1H), 7.22 (dd, *J* = 8.0, 4.1 Hz, 2H), 7.14 (d, *J* = 7.6 Hz, 1H), 5.44 (s, 1H), 5.30 (d, *J* = 16.1 Hz, 1H), 4.84 (d, *J* = 16.2 Hz, 1H). <sup>13</sup>C NMR (151 MHz, Chloroform-*d*) δ 162.78, 160.41, 159.32, 152.75, 138.86, 133.56, 133.04, 132.06, 131.68, 131.63, 130.35, 129.54, 128.94, 128.84 (q, *J* = 30.7 Hz), 128.07, 126.50 (q, *J* = 5.7 Hz), 124.44, 124.12 (q, *J* = 205.4 Hz), 123.07, 122.40, 116.73, 114.93, 106.04, 97.59, 53.31, 46.93 (d, *J* = 3.1 Hz). <sup>19</sup>F NMR (565 MHz, Chloroform-*d*) δ -59.55. HRMS (ESI-TOF) calcd for C<sub>26</sub>H<sub>15</sub>BrF<sub>3</sub>NO<sub>4</sub> [M + Na]<sup>+</sup>: 564.0029; found: 564.0026.

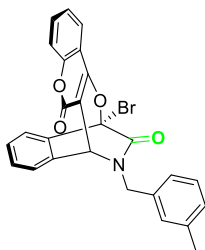

**12-bromo-15-(3-methylbenzyl)-7,12-dihydro-6H-7,12-**

**(epiminomethano)benzo[5,6]oxepino[3,2-c]chromene-6,14-dione (3o).** Purification by flash column chromatography eluting with petroleum ether/ethyl acetate (8/1, v/v) gave **3o** as a white solid (50mg, 51%). mp 175 - 177 °C. <sup>1</sup>H NMR (600 MHz, Chloroform-*d*) δ 8.06 (d, *J* = 7.8 Hz, 1H), 7.74 (dd, *J* = 8.1, 1.5 Hz, 1H), 7.51 (td, *J* = 7.8, 2.2 Hz, 1H), 7.45 (td, *J* = 7.8, 1.2 Hz, 1H), 7.38 (td, *J* = 7.5, 1.2 Hz, 1H), 7.24 (d, *J* = 7.8 Hz, 1H), 7.22 – 7.18 (m, 2H), 7.14 (t, *J* = 7.8 Hz, 1H), 7.07 – 7.03 (m, 3H), 5.48 (s, 1H), 4.94 (d, *J* = 15.0 Hz, 1H), 4.65 (d, *J* = 15.0 Hz, 1H), 2.20 (s, 3H). <sup>13</sup>C NMR (151 MHz, Chloroform-*d*) δ 162.30, 160.57, 159.16, 152.69, 139.02, 138.51, 134.95, 132.86, 131.75, 131.41, 130.20, 129.30, 129.24, 128.90, 128.68, 125.56, 124.36, 123.04, 122.32, 116.61, 114.99, 106.42, 97.90, 52.98, 50.76, 21.14. HRMS (ESI-TOF) calcd for C<sub>26</sub>H<sub>18</sub>BrNO<sub>4</sub> [M + Na]<sup>+</sup>: 510.0311; found: 510.0308.

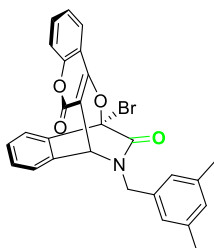

**12-bromo-15-(3,5-dimethylbenzyl)-7,12-dihydro-6H-7,12-**

**(epiminomethano)benzo[5,6]oxepino[3,2-c]chromene-6,14-dione (3p).** Purification by flash column chromatography eluting with petroleum ether/ethyl acetate (8/1, v/v) gave **3p** as a white solid (54mg, 54%). mp 174 - 176 °C. <sup>1</sup>H NMR (600 MHz, Chloroform-*d*) δ 8.06 (d, *J* = 7.8 Hz, 1H), 7.74 (d, *J* = 7.8 Hz, 1H), 7.50 (t, *J* = 8.1 Hz, 1H), 7.45 (t, *J* = 7.8 Hz, 1H), 7.38 (t, *J* = 7.5 Hz, 1H), 7.27 – 7.18 (m, 3H), 6.85 (d, *J* = 5.4 Hz, 3H), 5.47 (s, 1H), 4.85 (d, *J* = 15.0 Hz, 1H), 4.67 (d, *J* = 14.4 Hz, 1H), 2.16 (s, 6H). <sup>13</sup>C NMR (151 MHz, Chloroform-*d*) δ 162.32, 160.48, 159.04, 152.70, 139.10, 138.37, 134.87, 132.80, 131.76, 131.37, 130.20, 129.73, 129.27, 126.29, 124.32, 123.02, 122.32, 116.57, 115.02, 106.57, 97.94, 53.03, 50.80, 21.02. HRMS (ESI-TOF) calcd for C<sub>27</sub>H<sub>20</sub>BrNO<sub>4</sub> [M + Na]<sup>+</sup>: 524.0468; found: 524.0466.

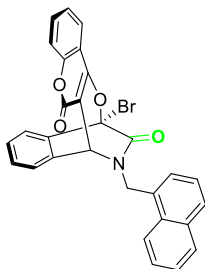

**12-bromo-15-(naphthalen-1-ylmethyl)-7,12-dihydro-6H-7,12-**

**(epiminomethano)benzo[5,6]oxepino[3,2-c]chromene-6,14-dione (3q).** Purification by flash column chromatography eluting with petroleum ether/ethyl acetate (8/1, v/v) gave **3q** as a white

solid (58mg, 55%). mp 191 - 193 °C.  $^1\text{H}$  NMR (600 MHz, Chloroform-*d*)  $\delta$  8.02 (d,  $J = 7.8$  Hz, 1H), 7.88 (d,  $J = 7.8$  Hz, 1H), 7.85 (d,  $J = 7.8$  Hz, 1H), 7.73 (dd,  $J = 7.5, 1.5$  Hz, 1H), 7.65 (dd,  $J = 8.1, 1.5$  Hz, 1H), 7.56 (d,  $J = 6.6$  Hz, 1H), 7.49 (t,  $J = 7.5$  Hz, 1H), 7.43 (t,  $J = 7.8$  Hz, 1H), 7.39 (t,  $J = 7.8$  Hz, 1H), 7.28 (t,  $J = 7.5$  Hz, 1H), 7.24 – 7.17 (m, 3H), 7.06 (dd,  $J = 8.1, 5.7$  Hz, 2H), 5.44 (s, 1H), 5.31 (d,  $J = 15.0$  Hz, 1H), 5.25 (d,  $J = 14.4$  Hz, 1H).  $^{13}\text{C}$  NMR (151 MHz, Chloroform-*d*)  $\delta$  162.15, 159.91, 158.97, 152.51, 138.82, 133.76, 132.59, 131.55, 131.52, 131.36, 130.42, 130.18, 129.66, 129.27, 129.19, 128.56, 126.63, 125.72, 125.40, 124.16, 123.41, 122.83, 122.39, 116.47, 114.88, 106.28, 97.89, 51.88, 48.80. HRMS (ESI-TOF) calcd for  $\text{C}_{29}\text{H}_{18}\text{BrNO}_4$  [ $\text{M} + \text{Na}$ ] $^+$ : 546.0311; found: 546.0307.

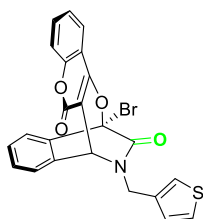

**12-bromo-15-(thiophen-3-ylmethyl)-7,12-dihydro-6H-7,12-**

**(epiminomethano)benzo[5,6]oxepino[3,2-c]chromene-6,14-dione (3r).** Purification by flash column chromatography eluting with petroleum ether/ethyl acetate (8/1, v/v) gave **3r** as a white solid (44mg, 46%). mp 213 - 215 °C.  $^1\text{H}$  NMR (600 MHz, Chloroform-*d*)  $\delta$  8.05 (dd,  $J = 7.8, 1.2$  Hz, 1H), 7.72 (dt,  $J = 8.4, 1.2$  Hz, 1H), 7.50 (t,  $J = 8.4$  Hz, 1H), 7.45 (td,  $J = 7.8, 1.2$  Hz, 1H), 7.39 (td,  $J = 7.5, 1.2$  Hz, 1H), 7.27 (d,  $J = 3.0$  Hz, 1H), 7.27 (d,  $J = 3.0$  Hz, 1H), 7.23 (d,  $J = 7.8$  Hz, 1H), 7.20 (d,  $J = 8.4$  Hz, 1H), 7.17 (dd,  $J = 4.8, 3.0$  Hz, 1H), 6.94 (dd,  $J = 5.1, 1.5$  Hz, 1H), 5.53 (s, 1H), 4.91 (d,  $J = 14.4$  Hz, 1H), 4.75 (d,  $J = 15.0$  Hz, 1H).  $^{13}\text{C}$  NMR (151 MHz, Chloroform-*d*)  $\delta$  162.04, 160.66, 159.14, 152.67, 138.94, 135.62, 132.90, 131.71, 131.48, 130.21, 129.35, 127.44, 126.78, 124.53, 124.38, 123.03, 122.33, 116.66, 114.94, 106.30, 97.77, 53.01, 45.84. HRMS (ESI-TOF) calcd for  $\text{C}_{23}\text{H}_{14}\text{BrNO}_4\text{S}$  [ $\text{M} + \text{Na}$ ] $^+$ : 501.9709; found: 501.9718.

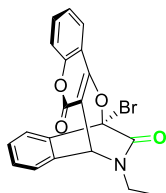

**12-bromo-15-ethyl-7,12-dihydro-6H-7,12-(epiminomethano)benzo[5,6]oxepino[3,2-**

**c]chromene-6,14-dione (3s).** Purification by flash column chromatography eluting with petroleum ether/ethyl acetate (8/1, v/v) gave **3s** as a white solid (46mg, 43%). mp 224 - 226 °C.  $^1\text{H}$  NMR (600 MHz, Chloroform-*d*)  $\delta$  8.05 (d,  $J = 7.2$  Hz, 1H), 7.75 (dd,  $J = 7.8, 1.8$  Hz, 1H), 7.53 (td,  $J = 7.8, 2.0$  Hz, 1H), 7.47 (t,  $J = 7.8$  Hz, 1H), 7.44 (td,  $J = 7.5, 1.4$  Hz, 1H), 7.38 (dd,  $J = 7.2, 1.2$  Hz, 1H), 7.28 – 7.24 (m, 3H), 5.54 (s, 1H), 3.80 – 3.65 (m, 2H), 1.24 (td,  $J = 7.2, 1.4$  Hz, 3H).  $^{13}\text{C}$  NMR (151 MHz, Chloroform-*d*)  $\delta$  161.44, 160.91, 159.36, 152.76, 139.18, 132.94, 131.97, 131.40, 130.18, 129.32, 124.45, 123.12, 122.25, 116.72, 115.11, 106.64, 98.07, 53.49, 42.92, 13.17. HRMS (ESI-TOF) calcd for  $\text{C}_{20}\text{H}_{14}\text{BrNO}_4$  [ $\text{M} + \text{H}$ ] $^+$ : 412.0179; found: 412.0177.

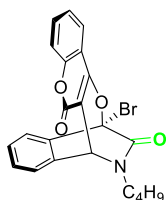

**12-bromo-15-butyl-7,12-dihydro-6H-7,12-(epiminomethano)benzo[5,6]oxepino[3,2-c]chromene-6,14-dione (3t)**. Purification by flash column chromatography eluting with petroleum ether/ethyl acetate (8/1, v/v) gave **3t** as a white solid (50mg, 57%). mp 164 - 166 °C. <sup>1</sup>H NMR (600 MHz, Chloroform-*d*) δ 8.05 (d, *J* = 7.8 Hz, 1H), 7.76 (d, *J* = 9.0 Hz, 1H), 7.53 (td, *J* = 7.8, 1.6 Hz, 1H), 7.47 (td, *J* = 7.8, 1.4 Hz, 1H), 7.44 (td, *J* = 7.5, 1.2 Hz, 1H), 7.37 (dd, *J* = 7.2, 1.8 Hz, 1H), 7.26 (d, *J* = 8.4 Hz, 2H), 5.52 (s, 1H), 3.71 – 3.60 (m, 2H), 1.65 – 1.58 (m, 2H), 1.31 – 1.23 (m, 2H), 0.88 (t, *J* = 7.2 Hz, 3H). <sup>13</sup>C NMR (151 MHz, Chloroform-*d*) δ 161.75, 160.95, 159.36, 152.75, 139.17, 132.95, 131.95, 131.41, 130.20, 129.32, 124.46, 123.13, 122.27, 116.73, 115.09, 106.49, 98.12, 53.83, 47.78, 29.95, 19.93, 13.64. HRMS (ESI-TOF) calcd for C<sub>22</sub>H<sub>18</sub>BrNO<sub>4</sub> [M + H]<sup>+</sup>: 440.0492; found: 440.0490.

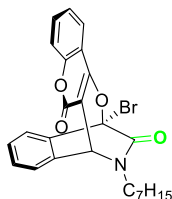

**12-bromo-15-heptyl-7,12-dihydro-6H-7,12-(epiminomethano)benzo[5,6]oxepino[3,2-c]chromene-6,14-dione (3u)**. Purification by flash column chromatography eluting with petroleum ether/ethyl acetate (8/1, v/v) gave **3u** as a white solid (46mg, 48%). mp 140 - 142 °C. <sup>1</sup>H NMR (600 MHz, Chloroform-*d*) δ 8.05 (d, *J* = 7.2 Hz, 1H), 7.75 (d, *J* = 7.8 Hz, 1H), 7.53 (t, *J* = 7.8 Hz, 1H), 7.47 (t, *J* = 7.5 Hz, 1H), 7.43 (t, *J* = 7.5 Hz, 1H), 7.37 (d, *J* = 7.2 Hz, 1H), 7.29 – 7.21 (m, 2H), 5.51 (s, 1H), 3.68 – 3.62 (m, 2H), 1.64 – 1.58 (m, 2H), 1.30 – 1.07 (m, 8H), 0.79 (t, *J* = 6.9 Hz, 3H). <sup>13</sup>C NMR (151 MHz, Chloroform-*d*) δ 161.73, 160.89, 159.32, 152.74, 139.21, 132.92, 131.96, 131.38, 130.20, 129.30, 124.43, 123.11, 123.10, 122.26, 116.70, 115.09 (d, *J* = 2.7 Hz), 106.56, 98.15, 53.86, 48.13, 31.52, 28.79, 27.92, 26.65, 22.40, 13.93. HRMS (ESI-TOF) calcd for C<sub>25</sub>H<sub>24</sub>BrNO<sub>4</sub> [M + H]<sup>+</sup>: 482.0961; found: 482.0959.

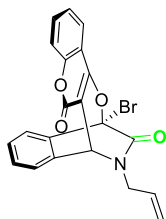

**15-allyl-12-bromo-7,12-dihydro-6H-7,12-(epiminomethano)benzo[5,6]oxepino[3,2-c]chromene-6,14-dione (3v)**. Purification by flash column chromatography eluting with petroleum ether/ethyl acetate (8/1, v/v) gave **3v** as a white solid (55mg, 65%). mp 180 - 182 °C. <sup>1</sup>H NMR (600 MHz, Chloroform-*d*) δ 8.06 (dd, *J* = 7.8, 1.8 Hz, 1H), 7.74 (dd, *J* = 7.8, 1.8 Hz, 1H), 7.55 – 7.49 (m, 1H), 7.47 (td, *J* = 8.1, 1.4 Hz, 1H), 7.43 (t, *J* = 7.5 Hz, 1H), 7.35 (dd, *J* = 7.5, 1.5 Hz, 1H), 7.26 – 7.22 (m, 2H), 5.81 – 5.73 (m, 1H), 5.53 (s, 1H), 5.31 (d, *J* = 18.6 Hz, 1H), 5.26 (d, *J* = 10.2 Hz, 1H), 4.42 (dd, *J* = 5.7, 1.5 Hz, 1H), 4.09 (dd, *J* = 15.3, 6.9 Hz, 1H). <sup>13</sup>C NMR (151 MHz, Chloroform-*d*) δ 161.80, 160.80, 159.44, 152.79, 139.02, 132.94, 131.93, 131.47, 130.94, 130.20, 129.34, 124.42, 123.10, 122.39, 119.97, 116.72, 115.08, 106.36, 97.81, 52.92, 49.71. HRMS (ESI-TOF) calcd for C<sub>21</sub>H<sub>14</sub>BrNO<sub>4</sub> [M + H]<sup>+</sup>: 424.0179; found: 424.0176.

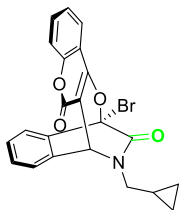

**12-bromo-15-(cyclopropylmethyl)-7,12-dihydro-6H-7,12-**

**(epiminomethano)benzo[5,6]oxepino[3,2-c]chromene-6,14-dione (3w).** Purification by flash column chromatography eluting with petroleum ether/ethyl acetate (8/1, v/v) gave **3w** as a white solid (54mg, 62%). mp 204 - 206 °C. <sup>1</sup>H NMR (600 MHz, Chloroform-d) δ 8.06 (d, J = 7.8 Hz, 1H), 7.76 (dd, J = 7.8, 2.4 Hz, 1H), 7.53 (t, J = 7.8 Hz, 1H), 7.48 (t, J = 7.8 Hz, H), 7.44 (td, J = 7.5, 1.2 Hz 1H), 7.39 (d, J = 7.2 Hz, 1H), 7.28 – 7.23 (m, 2H), 5.69 (s, 1H), 3.60 – 3.46 (m, 2H), 1.12 – 1.05 (m, 1H), 0.52 – 0.48 (m, 2H), 0.37 – 0.32 (m, 2H). <sup>13</sup>C NMR (151 MHz, Chloroform-d) δ 161.84, 160.95, 159.23, 152.73, 139.27, 132.87, 131.91, 131.40, 130.23, 129.30, 124.42, 123.12, 123.10, 122.33, 116.70, 115.11, 106.70, 98.08, 53.54, 52.14, 9.53, 3.78. HRMS (ESI-TOF) calcd for C<sub>22</sub>H<sub>16</sub>BrNO<sub>4</sub> [M + H]<sup>+</sup>: 438.0355; found: 438.0332.

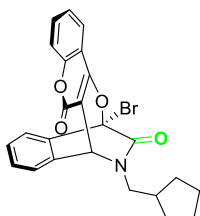

**12-bromo-15-(cyclopentylmethyl)-7,12-dihydro-6H-7,12-**

**(epiminomethano)benzo[5,6]oxepino[3,2-c]chromene-6,14-dione (3x).** Purification by flash column chromatography eluting with petroleum ether/ethyl acetate (8/1, v/v) gave **3x** as a white solid (44mg, 47%). mp 206 - 208 °C. <sup>1</sup>H NMR (600 MHz, Chloroform-d) δ 8.06 (d, J = 7.8 Hz, 1H), 7.75 (d, J = 7.2 Hz, 1H), 7.52 (t, J = 7.8 Hz, 1H), 7.47 (t, J = 7.8 Hz, 1H), 7.44 (t, J = 7.5 Hz, 1H), 7.37 (d, J = 7.8 Hz, 1H), 7.27 – 7.24 (m, 2H), 5.54 (s, 1H), 3.63 (dd, J = 13.2, 7.2 Hz, 1H), 3.54 (dd, J = 13.5, 8.7 Hz, 1H), 2.33 - 2.28 (m, 1H), 1.72 – 1.58 (m, 3H), 1.57 – 1.43 (m, 3H), 1.30 – 1.23 (m, 1H), 1.20 – 1.13 (m, 1H). <sup>13</sup>C NMR (151 MHz, Chloroform-d) δ 162.03, 160.95, 159.33, 152.75, 139.24, 132.93, 131.95, 131.40, 130.24, 129.31, 124.45, 123.13, 122.28, 116.72, 115.06, 106.46, 98.24, 53.97, 52.49, 30.30, 30.19, 25.15, 24.97. HRMS (ESI-TOF) calcd for C<sub>24</sub>H<sub>20</sub>BrNO<sub>4</sub> [M + H]<sup>+</sup>: 466.0648; found: 466.0646.

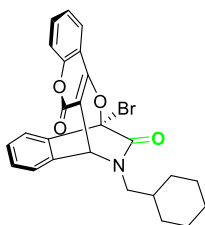

**12-bromo-15-(cyclohexylmethyl)-7,12-dihydro-6H-7,12-**

**(epiminomethano)benzo[5,6]oxepino[3,2-c]chromene-6,14-dione (3y).** Purification by flash column chromatography eluting with petroleum ether/ethyl acetate (8/1, v/v) gave **3y** as a white solid (53mg, 55%). mp 200 - 202 °C. <sup>1</sup>H NMR (600 MHz, Chloroform-d) δ 8.06 (d, J = 7.8 Hz, 1H), 7.75 (d, J = 7.2 Hz, 1H), 7.53 (t, J = 7.8 Hz, 1H), 7.47 (t, J = 7.8 Hz, 1H), 7.44 (t, J = 7.5 Hz, 1H), 7.36

(d,  $J = 7.2$  Hz, 1H), 7.28 – 7.23 (m, 2H), 5.49 (s, 1H), 3.63 (dd,  $J = 13.8, 6.6$  Hz, 1H), 3.34 (dd,  $J = 13.8, 8.4$  Hz, 1H), 1.76 – 1.71 (m, 1H), 1.68 – 1.52 (m, 5H), 1.20 – 1.06 (m, 3H), 1.04 – 0.91 (m, 2H).  $^{13}\text{C}$  NMR (151 MHz, Chloroform- $d$ )  $\delta$  162.12, 160.99, 159.34, 152.75, 139.16, 132.94, 132.01, 131.42, 130.22, 129.32, 124.44, 123.13, 122.32, 116.70, 115.06, 106.36, 98.21, 54.57, 54.31, 36.74, 30.75, 30.50, 26.20, 25.58. HRMS (ESI-TOF) calcd for  $\text{C}_{25}\text{H}_{22}\text{BrNO}_4$  [ $\text{M} + \text{H}$ ] $^+$ : 480.0805; found: 480.0801.

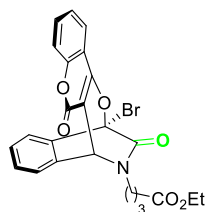

**4-(12-bromo-6,14-dioxo-7,12-dihydro-6H-7,12-(epiminomethano)benzo[5,6]oxepino[3,2-c]chromene-15-yl)butanoate (3z).** Purification by flash column chromatography eluting with petroleum ether/ethyl acetate (8/1, v/v) gave **3z** as a white solid (43mg, 43%). mp 138 - 140 °C.  $^1\text{H}$  NMR (600 MHz, Chloroform- $d$ )  $\delta$  8.05 (dd,  $J = 7.5, 1.5$  Hz, 1H), 7.75 (dd,  $J = 8.1, 1.5$  Hz, 1H), 7.53 (td,  $J = 7.8, 1.6$  Hz, 1H), 7.48 (td,  $J = 7.8, 1.4$  Hz, 1H), 7.45 (td,  $J = 7.5, 1.4$  Hz, 1H), 7.39 (dd,  $J = 7.2, 1.8$  Hz, 1H), 7.27 – 7.24 (m, 2H), 5.55 (s, 1H), 4.08 – 4.03 (m, 2H), 3.81 – 3.76 (m, 1H), 3.65 – 3.61 (m, 1H), 2.27 (t,  $J = 7.5$  Hz, 2H), 1.98 (p,  $J = 7.2$  Hz, 2H), 1.21 (t,  $J = 6.9$  Hz, 3H).  $^{13}\text{C}$  NMR (151 MHz, Chloroform- $d$ )  $\delta$  172.41, 162.04, 160.89, 159.37, 152.77, 139.00, 133.01, 131.80, 131.50, 130.21, 129.41, 124.46, 123.12, 122.43, 116.73, 115.04, 106.35, 97.89, 60.56, 54.03, 47.28, 31.35, 23.32, 14.15. HRMS (ESI-TOF) calcd for  $\text{C}_{24}\text{H}_{20}\text{BrNO}_6$  [ $\text{M} + \text{H}$ ] $^+$ : 498.0547; found: 498.0549.

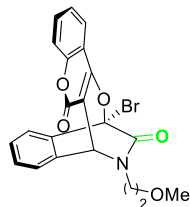

**12-bromo-15-(2-methoxyethyl)-7,12-dihydro-6H-7,12-(epiminomethano)benzo[5,6]oxepino[3,2-c]chromene-6,14-dione (3aa).** Purification by flash column chromatography eluting with petroleum ether/ethyl acetate (8/1, v/v) gave **3aa** as a white solid (44mg, 50%). mp 140 - 142 °C.  $^1\text{H}$  NMR (600 MHz, Chloroform- $d$ )  $\delta$  8.07 (dd,  $J = 7.5, 1.5$  Hz, 1H), 7.77 (dd,  $J = 8.1, 1.5$  Hz, 1H), 7.54 (dd,  $J = 7.8, 1.6$  Hz, 1H), 7.48 (td,  $J = 7.8, 1.4$  Hz, 1H), 7.45 (td,  $J = 7.5, 1.4$  Hz, 1H), 7.39 (dd,  $J = 7.5, 1.8$  Hz, 1H), 7.30 – 7.24 (m, 2H), 5.68 (s, 1H), 3.94 (m, 1H), 3.79 (m, 1H), 3.61 – 3.52 (m, 2H), 3.23 (s, 3H).  $^{13}\text{C}$  NMR (151 MHz, Chloroform- $d$ )  $\delta$  162.07, 160.86, 158.76, 152.72, 139.54, 132.74, 131.72, 131.36, 130.19, 129.19, 124.34, 123.06, 122.44, 116.64, 115.18, 106.89, 97.95, 70.29, 58.68, 55.18, 47.96. HRMS (ESI-TOF) calcd for  $\text{C}_{21}\text{H}_{16}\text{BrNO}_5$  [ $\text{M} + \text{H}$ ] $^+$ : 442.0285; found: 442.0282.

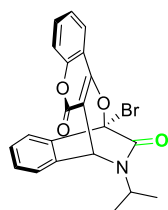

**12-bromo-15-isopropyl-7,12-dihydro-6H-7,12-(epiminomethano)benzo[5,6]oxepino[3,2-c]chromene-6,14-dione (3ab).** Purification by flash column chromatography eluting with petroleum ether/ethyl acetate (8/1, v/v) gave **3ab** as a white solid (35mg, 41%). mp 232 - 234 °C. <sup>1</sup>H NMR (600 MHz, Chloroform-*d*) δ 8.05 (dd, *J* = 7.8, 1.2 Hz, 1H), 7.76 (dd, *J* = 8.1, 1.5 Hz, 1H), 7.52 (td, *J* = 7.8, 2.0 Hz, 1H), 7.46 (td, *J* = 7.5, 1.4 Hz, 1H), 7.43 (td, *J* = 7.5, 1.6 Hz, 1H), 7.38 (dd, *J* = 7.2, 1.2 Hz, 1H), 7.26 – 7.23 (m, 2H), 5.62 (s, 1H), 4.87 – 4.81 (m, 1H), 1.28 (d, *J* = 7.2 Hz, 3H), 1.24 (d, *J* = 6.6 Hz, 3H). <sup>13</sup>C NMR (151 MHz, Chloroform-*d*) δ 161.27, 160.51, 159.33, 152.80, 139.67, 132.88, 131.97, 131.46, 130.27, 129.30, 124.44, 123.15, 121.98, 116.72, 115.13, 107.20, 98.50, 48.07, 47.14, 20.54, 19.36. HRMS (ESI-TOF) calcd for C<sub>21</sub>H<sub>16</sub>BrNO<sub>4</sub> [M + H]<sup>+</sup>: 426.0355; found: 426.0331.

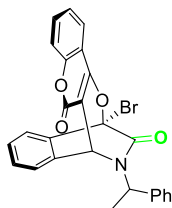

**12-bromo-15-(1-phenylethyl)-7,12-dihydro-6H-7,12-(epiminomethano)benzo[5,6]oxepino[3,2-c]chromene-6,14-dione (3ac).** Purification by flash column chromatography eluting with petroleum ether/ethyl acetate (8/1, v/v) gave **3ac** as a white solid (34mg, 35%). mp 245 - 247 °C. <sup>1</sup>H NMR (600 MHz, Chloroform-*d*) δ 8.03 (d, *J* = 7.8 Hz, 1H), 7.78 (d, *J* = 8.4 Hz, 1H), 7.53 (td, *J* = 7.8, 1.6 Hz, 1H), 7.41 (t, *J* = 7.8 Hz, 1H), 7.31 – 7.28 (m, 3H), 7.28 – 7.24 (m, 5H), 6.88 (d, *J* = 7.2 Hz, 1H), 5.97 – 5.92 (m, 1H), 5.34 (s, 1H), 1.65 (d, *J* = 7.2 Hz, 3H). <sup>13</sup>C NMR (151 MHz, Chloroform-*d*) δ 161.60, 160.40, 159.35, 152.79, 139.51, 138.21, 132.90, 131.58, 131.29, 130.07, 129.15, 128.73, 128.07, 127.44, 124.43, 123.15, 121.89, 116.71, 115.06, 107.08, 98.34, 53.47, 48.84, 16.94. HRMS (ESI-TOF) calcd for C<sub>26</sub>H<sub>18</sub>BrNO<sub>4</sub> [M + H]<sup>+</sup>: 488.0492; found: 488.0487.

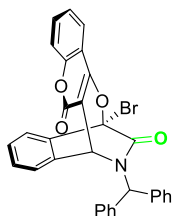

**15-benzhydryl-12-bromo-7,12-dihydro-6H-7,12-(epiminomethano)benzo[5,6]oxepino[3,2-c]chromene-6,14-dione (3ad).** Purification by flash column chromatography eluting with petroleum ether/ethyl acetate (8/1, v/v) gave **3ad** as a white solid (35mg, 32%). mp 255 - 257 °C. <sup>1</sup>H NMR (600 MHz, Chloroform-*d*) δ 8.09 (d, *J* = 7.8 Hz, 1H), 7.70 (dd, *J* = 7.8, 1.6 Hz, 1H), 7.52 – 7.41 (m, 3H), 7.33 (dd, *J* = 6.6, 3.0 Hz, 2H), 7.30 (dd, *J* = 5.4, 1.8 Hz, 3H), 7.24 – 7.20 (m, 5H), 7.15 (s, 1H), 7.13 (d, *J* = 7.8 Hz, 1H), 7.10 – 7.05 (m, 2H), 5.61 (s, 1H). <sup>13</sup>C NMR (151 MHz, Chloroform-*d*) δ 162.94, 159.56, 158.39, 152.49, 139.84, 137.99, 137.02, 132.64, 131.66, 131.23, 130.69, 129.54, 129.45, 128.74, 128.69, 128.44, 127.82, 124.22, 122.98, 122.02, 116.47, 114.79, 107.15, 97.97, 62.84, 50.92. HRMS (ESI-TOF) calcd for C<sub>31</sub>H<sub>20</sub>BrNO<sub>4</sub> [M + H]<sup>+</sup>: 550.0648; found: 550.0463.

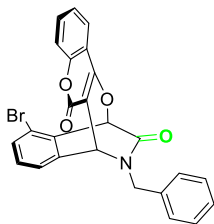

**15-benzyl-11-bromo-7,12-dihydro-6H-7,12-(epiminomethano)benzo[5,6]oxepino[3,2-c]chromene-6,14-dione (3ae).** Until iminium salt **1ae** was consumed as indicated by TLC (for 8 h). 4-Hydroxycoumarin **2a** (0.4 mmol) and anhydrous DMF (0.5 mL) was added. The reaction mixture was heated at 70 °C in the oil bath until the intermediate was consumed as indicated by TLC (for 8 h), then cooled to room temperature. Diluted with water (5 mL), and extracted with ethyl acetate (3 × 5 mL). The combined organic layer was washed with brine, dried over Na<sub>2</sub>SO<sub>4</sub>, filtered, and concentrated under reduced pressure. The crude product was purified by flash column chromatography eluting with petroleum ether/ethyl acetate (8/1, v/v) **3ae** as a white solid (36 mg, 38%). mp 255 - 257 °C. <sup>1</sup>H NMR (600 MHz, Chloroform-*d*) δ 7.81 (dd, *J* = 8.1, 1.5 Hz, 1H), 7.56 (d, *J* = 8.4 Hz, 1H), 7.53 – 7.49 (m, 1H), 7.27 – 7.24 (m, 3H), 7.23 (t, *J* = 8.7 Hz, 2H), 7.21 (d, *J* = 8.4 Hz, 1H), 7.19 (d, *J* = 7.8 Hz, 1H), 7.14 (d, *J* = 7.2 Hz, 1H), 6.23 (s, 1H), 5.45 (s, 1H), 5.02 (d, *J* = 15.0 Hz, 1H), 4.51 (d, *J* = 15.0 Hz, 1H). <sup>13</sup>C NMR (151 MHz, Chloroform-*d*) δ 165.63, 160.98, 159.29, 152.78, 143.67, 135.23, 132.85, 132.76, 132.04, 129.61, 128.79, 128.38, 128.07, 124.26, 123.79, 123.12, 121.74, 116.63, 115.70, 106.13, 79.30, 53.20, 48.76. HRMS (ESI-TOF) calcd for C<sub>25</sub>H<sub>16</sub>BrNO<sub>4</sub> [M + H]<sup>+</sup>: 474.0335; found: 474.0335.

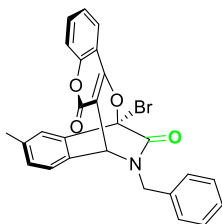

**15-benzyl-12-bromo-10-methyl-7,12-dihydro-6H-7,12-(epiminomethano)benzo[5,6]oxepino[3,2-c]chromene-6,14-dione (3af).** Purification by flash column chromatography eluting with petroleum ether/ethyl acetate (8/1, v/v) gave **3af** as a white solid (43mg, 44%). mp 226 - 228 °C. <sup>1</sup>H NMR (600 MHz, Chloroform-*d*) δ 7.86 (s, 1H), 7.73 (d, *J* = 7.8 Hz, 1H), 7.50 (t, *J* = 7.8 Hz, 1H), 7.26 – 7.22 (m, 6H), 7.20 (d, *J* = 8.4 Hz, 1H), 7.16 (d, *J* = 7.2 Hz, 1H), 7.06 (d, *J* = 7.2 Hz, 1H), 5.45 (s, 1H), 5.04 (d, *J* = 14.4 Hz, 1H), 4.59 (d, *J* = 14.4 Hz, 1H), 2.40 (s, 3H). <sup>13</sup>C NMR (151 MHz, Chloroform-*d*) δ 162.35, 160.68, 159.17, 152.67, 139.51, 136.22, 135.14, 132.80, 131.90, 131.59, 130.70, 128.78, 128.50, 128.12, 124.33, 123.02, 122.27, 116.62, 115.05, 106.53, 98.13, 52.68, 50.68, 21.37. HRMS (ESI-TOF) calcd for C<sub>26</sub>H<sub>18</sub>BrNO<sub>4</sub> [M + Na]<sup>+</sup>: 510.0311; found: 510.0310.

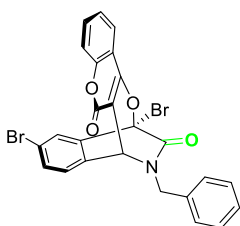

**15-benzyl-10,12-dibromo-7,12-dihydro-6H-7,12-(epiminomethano)benzo[5,6]oxepino[3,2-**



**c]chromene-6,14-dione (3ag).** Purification by flash column chromatography eluting with petroleum ether/ethyl acetate (8/1, v/v) gave **3ag** as a white solid (62mg, 56%). mp 223 - 226 °C. <sup>1</sup>H NMR (600 MHz, Chloroform-*d*) δ 8.21 (d, *J* = 1.8 Hz, 1H), 7.73 (dd, *J* = 8.1, 1.5 Hz, 1H), 7.53 (t, *J* = 7.5 Hz, 1H), 7.50 (dd, *J* = 8.4, 1.8 Hz, 1H), 7.26 (dp, *J* = 7.9, 4.1 Hz, 6H), 7.22 (d, *J* = 8.4 Hz, 1H), 7.05 (d, *J* = 7.8 Hz, 1H), 5.46 (s, 1H), 5.05 (d, *J* = 15.0 Hz, 1H), 4.57 (d, *J* = 15.0 Hz, 1H). <sup>13</sup>C NMR (151 MHz, Chloroform-*d*) δ 161.65, 160.50, 159.33, 152.72, 137.76, 134.82, 134.43, 133.58, 133.32, 133.11, 128.87 (d, *J* = 3.3 Hz), 128.53 (d, *J* = 3.3 Hz), 128.30, 124.50, 123.93, 123.36, 123.02, 116.71 (d, *J* = 3.3 Hz), 114.78, 105.90, 96.58, 52.33, 50.72. HRMS (ESI-TOF) calcd for C<sub>25</sub>H<sub>15</sub>Br<sub>2</sub>NO<sub>4</sub> [M + Na]<sup>+</sup>: 573.9260; found: 573.9257.

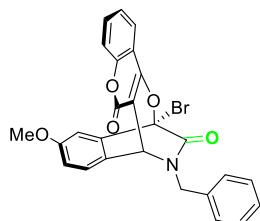

**15-benzyl-12-bromo-9-methoxy-7,12-dihydro-6H-7,12-**

**(epiminomethano)benzo[5,6]oxepino[3,2-c]chromene-6,14-dione (3ah).** Purification by flash column chromatography eluting with petroleum ether/ethyl acetate (8/1, v/v) gave **3ah** as a white solid (44mg, 44%). mp 178 - 180 °C. <sup>1</sup>H NMR (600 MHz, Chloroform-*d*) δ 7.73 (dd, *J* = 8.1, 1.5 Hz, 1H), 7.61 (d, *J* = 2.4 Hz, 1H), 7.50 (td, *J* = 7.8, 1.8 Hz, 1H), 7.26 – 7.23 (m, 6H), 7.21 (d, *J* = 8.4 Hz, 1H), 7.09 (d, *J* = 8.4 Hz, 1H), 6.85 (dd, *J* = 8.4, 2.4 Hz, 1H), 5.43 (s, 1H), 5.04 (d, *J* = 15.0 Hz, 1H), 4.58 (d, *J* = 15.0 Hz, 1H), 3.84 (s, 3H). <sup>13</sup>C NMR (151 MHz, Chloroform-*d*) δ 162.20, 160.69, 160.52, 159.04, 152.65, 135.11, 133.11, 132.79, 131.43, 128.78, 128.50, 128.12, 124.35, 123.70, 122.99, 116.63, 116.37, 116.25, 115.04, 106.88, 98.04, 55.68, 52.37, 50.68. HRMS (ESI-TOF) calcd for C<sub>26</sub>H<sub>18</sub>BrNO<sub>5</sub> [M + Na]<sup>+</sup>: 526.0261; found: 526.0259.

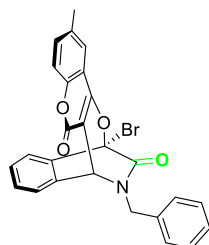

**15-benzyl-12-bromo-2-methyl-7,12-dihydro-6H-7,12-(epiminomethano)benzo[5,6]oxepino[3,2-c]chromene-6,14-dione (3aj).** Purification by flash column chromatography eluting with petroleum ether/ethyl acetate (8/1, v/v) gave **3aj** as a white solid (70mg, 72%). mp 224 - 226 °C. <sup>1</sup>H NMR (600 MHz, Chloroform-*d*) δ 8.05 (dd, *J* = 7.5, 1.2 Hz, 1H), 7.49 (d, *J* = 1.8 Hz, 1H), 7.44 (td, *J* = 7.8, 1.2 Hz, 1H), 7.36 (td, *J* = 7.5, 1.2 Hz, 1H), 7.30 (d, *J* = 9.0 Hz, 1H), 7.27 – 7.23 (m, 5H), 7.17 (dd, *J* = 7.2, 1.2 Hz, 1H), 7.09 (dd, *J* = 9.0, 1.8 Hz, 1H), 5.49 (s, 1H), 5.02 (d, *J* = 14.4 Hz, 1H), 4.62 (d, *J* = 15.0 Hz, 1H), 2.37 (s, 3H). <sup>13</sup>C NMR (151 MHz, Chloroform-*d*) δ 162.29, 160.81, 159.26, 150.88, 139.02, 135.11, 134.26, 133.94, 131.79, 131.41, 130.13, 129.27, 128.78, 128.53, 128.15, 122.59, 122.29, 116.40, 114.61, 106.16, 97.90, 52.99, 50.72, 20.87. HRMS (ESI-TOF) calcd for C<sub>26</sub>H<sub>18</sub>BrNO<sub>4</sub> [M + Na]<sup>+</sup>: 510.0311; found: 510.0309.

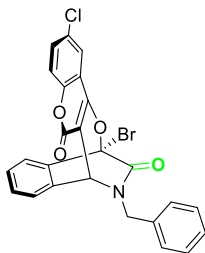

**15-benzyl-12-bromo-2-chloro-7,12-dihydro-6H-7,12-(epiminomethano)benzo[5,6]oxepino[3,2-c]chromene-6,14-dione (3ak).** Purification by flash column chromatography eluting with petroleum ether/ethyl acetate (8/1, v/v) gave **3ak** as a white solid (61mg, 60%). mp 228 - 230 °C.  $^1\text{H}$  NMR (600 MHz, Chloroform-*d*)  $\delta$  8.06 (d,  $J$  = 7.8 Hz, 1H), 7.69 (d,  $J$  = 2.3 Hz, 1H), 7.47 (d,  $J$  = 7.8 Hz, 1H), 7.45 (d,  $J$  = 8.4 Hz, 1H), 7.38 (t,  $J$  = 7.8 Hz, 1H), 7.26 (s, 5H), 7.18 (d,  $J$  = 7.5 Hz, 1H), 7.15 (dd,  $J$  = 8.8, 1.8 Hz, 1H), 5.46 (s, 1H), 4.98 (dd,  $J$  = 14.8, 1.9 Hz, 1H), 4.66 (dd,  $J$  = 14.7, 1.9 Hz, 1H).  $^{13}\text{C}$  NMR (151 MHz, Chloroform-*d*)  $\delta$  162.04, 160.06, 158.06, 151.01, 138.74, 135.02, 132.88, 131.57, 130.28, 130.09, 129.50, 128.82, 128.56, 128.24, 122.57, 122.35, 118.12, 116.10, 107.21, 97.80, 52.91, 50.82. HRMS (ESI-TOF) calcd for  $\text{C}_{25}\text{H}_{15}\text{BrClNO}_4$  [ $\text{M} + \text{Na}$ ] $^+$ : 529.9765; found: 529.9763.

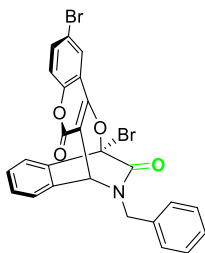

**15-benzyl-2,12-dibromo-7,12-dihydro-6H-7,12-(epiminomethano)benzo[5,6]oxepino[3,2-c]chromene-6,14-dione (3al).** Purification by flash column chromatography eluting with petroleum ether/ethyl acetate (8/1, v/v) gave **3al** as a white solid (53mg, 48%). mp 224 - 226 °C.  $^1\text{H}$  NMR (600 MHz, Chloroform-*d*)  $\delta$  8.06 (d,  $J$  = 7.8 Hz, 1H), 7.82 (d,  $J$  = 2.4 Hz, 1H), 7.58 (dd,  $J$  = 8.7, 2.1 Hz, 1H), 7.46 (t,  $J$  = 7.8 Hz, 1H), 7.38 (t,  $J$  = 7.5 Hz, 1H), 7.25 (s, 6H), 7.17 (d,  $J$  = 7.8 Hz, 1H), 7.08 (d,  $J$  = 8.4 Hz, 1H), 5.46 (s, 1H), 4.97 (d,  $J$  = 14.4 Hz, 1H), 4.66 (d,  $J$  = 15.0 Hz, 1H).  $^{13}\text{C}$  NMR (151 MHz, Chloroform-*d*)  $\delta$  162.03, 159.99, 157.96, 151.49, 138.73, 135.71, 135.02, 131.57, 130.29, 129.51, 128.83, 128.57, 128.24, 125.58, 122.35, 118.38, 117.31, 116.51, 107.20, 97.81, 52.91, 50.83. HRMS (ESI-TOF) calcd for  $\text{C}_{25}\text{H}_{18}\text{Br}_2\text{NO}_4$  [ $\text{M} + \text{Na}$ ] $^+$ : 573.9260; found: 573.9256.

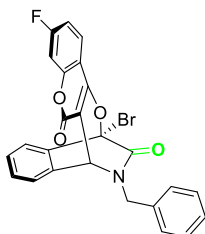

**15-benzyl-12-bromo-3-fluoro-7,12-dihydro-6H-7,12-(epiminomethano)benzo[5,6]oxepino[3,2-c]chromene-6,14-dione (3am).** Purification by flash column chromatography eluting with petroleum ether/ethyl acetate (8/1, v/v) gave **3am** as a white solid (54 mg, 55%). mp 185 - 187 °C.  $^1\text{H}$  NMR (600 MHz, Chloroform-*d*)  $\delta$  8.05 (d,  $J$  = 7.8 Hz, 1H), 7.73 (dd,  $J$  = 9.0, 6.0 Hz, 1H), 7.46 (td,  $J$  = 7.5, 1.4 Hz, 1H), 7.38 (td,  $J$  = 7.5, 1.2 Hz, 1H), 7.26 (s, 5H), 7.17 (dd,  $J$  = 7.8, 1.2 Hz, 1H), 6.98 (td,

$J = 7.8, 2.0$  Hz, 1H), 6.92 (dd,  $J = 8.7, 1.5$ , Hz, 1H), 5.45 (s, 1H), 5.00 (d,  $J = 15.0$ Hz, 1H), 4.64 (d,  $J = 15.0$  Hz, 1H).  $^{13}\text{C}$  NMR (151 MHz, Chloroform- $d$ )  $\delta$  165.16 (d,  $J = 255.3$  Hz), 162.17, 160.43, 158.90, 153.86 (d,  $J = 13.1$  Hz), 138.90, 135.02, 131.65, 131.54, 130.23, 129.39, 128.82, 128.55, 128.23, 125.09 (d,  $J = 10.4$  Hz), 122.32, 112.65 (d,  $J = 22.7$  Hz), 111.58 (d,  $J = 2.7$  Hz), 105.40 (d,  $J = 2.4$  Hz), 104.20 (d,  $J = 25.9$  Hz), 97.87, 52.92, 50.77.  $^{19}\text{F}$  NMR (565 MHz, Chloroform- $d$ )  $\delta$  -103.11. HRMS (ESI-TOF) calcd for  $\text{C}_{25}\text{H}_{15}\text{BrFNO}_4$   $[\text{M} + \text{H}]^+$ : 492.0241; found: 492.0240.

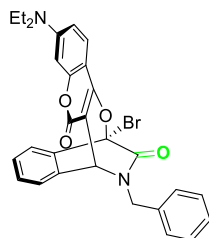

**15-benzyl-12-bromo-3-(diethylamino)-7,12-dihydro-6H-7,12-**

**(epiminomethano)benzo[5,6]oxepino[3,2-c]chromene-6,14-dione (3an).** Purification by flash column chromatography eluting with petroleum ether/ethyl acetate (8/1, v/v) gave **3an** as a white solid (80 mg, 73%). mp 156 - 158 °C.  $^1\text{H}$  NMR (600 MHz, Chloroform- $d$ )  $\delta$  7.51 (d,  $J = 9.0$  Hz, 2H), 7.34 (td,  $J = 7.2, 1.6$  Hz, 1H), 7.31 (td,  $J = 7.5, 1.4$  Hz, 1H), 7.26 – 7.22 (m, 3H), 7.21 (dd,  $J = 7.8, 1.8$  Hz, 1H), 7.18 (dd,  $J = 7.2, 1.5$  Hz, 1H), 6.52 (dd,  $J = 9.0, 2.4$  Hz, 1H), 6.35 (d,  $J = 1.8$  Hz, 1H), 5.69 (s, 1H), 5.43 (s, 1H), 5.06 (d,  $J = 14.4$  Hz, 1H), 4.46 (d,  $J = 15.0$  Hz, 1H), 3.36 (q,  $J = 7.0$  Hz, 4H), 1.16 (t,  $J = 7.2$  Hz, 6H).  $^{13}\text{C}$  NMR (151 MHz, Chloroform- $d$ )  $\delta$  166.86, 162.16, 160.59, 155.33, 151.03, 142.71, 135.68, 130.44, 130.28, 128.66, 128.57, 128.33, 128.24, 127.75, 123.93, 122.32, 108.74, 104.07, 101.06, 97.15, 80.35, 53.68, 48.66, 44.88, 12.35. HRMS (ESI-TOF) calcd for  $\text{C}_{29}\text{H}_{25}\text{BrN}_2\text{O}_4$   $[\text{M} + \text{H}]^+$ : 545.1070; found: 545.1073.

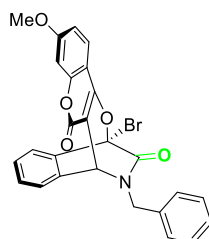

**15-benzyl-12-bromo-3-methoxy-7,12-dihydro-6H-7,12-**

**(epiminomethano)benzo[5,6]oxepino[3,2-c]chromene-6,14-dione (3ao).** Purification by flash column chromatography eluting with petroleum ether/ethyl acetate (8/1, v/v) gave **3ao** as a white solid (65 mg, 64%). mp 175 - 177 °C.  $^1\text{H}$  NMR (600 MHz, Chloroform- $d$ )  $\delta$  8.05 (d,  $J = 7.8$  Hz, 1H), 7.62 (d,  $J = 8.9$  Hz, 1H), 7.44 (t,  $J = 7.8$  Hz, 1H), 7.36 (t,  $J = 7.6$  Hz, 1H), 7.26 (s, 5H), 7.16 (d,  $J = 7.5$  Hz, 1H), 6.80 (dd,  $J = 9.0, 2.3$  Hz, 1H), 6.67 (d,  $J = 2.5$  Hz, 1H), 5.45 (s, 1H), 5.04 (d,  $J = 14.7$  Hz, 1H), 4.59 (d,  $J = 14.7$  Hz, 1H), 3.83 (s, 3H).  $^{13}\text{C}$  NMR (151 MHz, Chloroform- $d$ )  $\delta$  163.69, 162.39, 161.10, 159.79, 154.59, 139.19, 135.13, 131.87, 131.37, 130.13, 129.15, 128.78, 128.53, 128.11, 124.21, 122.23, 112.68, 108.09, 103.49, 100.44, 97.89, 55.81, 53.01, 50.64. HRMS (ESI-TOF) calcd for  $\text{C}_{26}\text{H}_{18}\text{BrNO}_5$   $[\text{M} + \text{H}]^+$ : 504.0441; found: 504.0441.

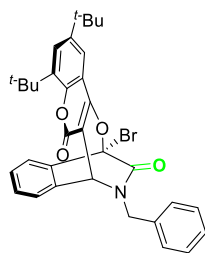

**15-benzyl-12-bromo-2,4-di-tert-butyl-7,12-dihydro-6H-7,12-(epiminomethano)benzo[5,6]oxepino[3,2-c]chromene-6,14-dione (3ap).** Purification by flash column chromatography eluting with petroleum ether/ethyl acetate (8/1, v/v) gave **3ap** as a white solid (81mg, 69%). mp 193 - 195 °C.  $^1\text{H}$  NMR (600 MHz, Chloroform-*d*)  $\delta$  8.10 (d,  $J = 7.8$  Hz, 1H), 7.60 (d,  $J = 2.2$  Hz, 1H), 7.58 (d,  $J = 2.4$  Hz, 1H), 7.47 (t,  $J = 7.7$  Hz, 1H), 7.39 (t,  $J = 7.7$  Hz, 1H), 7.32 – 7.26 (m, 5H), 7.22 (d,  $J = 7.6$  Hz, 1H), 5.53 (s, 1H), 5.05 (d,  $J = 14.8$  Hz, 1H), 4.68 (d,  $J = 14.7$  Hz, 1H), 1.46 (s, 9H), 1.35 (s, 9H).  $^{13}\text{C}$  NMR (151 MHz, Chloroform-*d*)  $\delta$  162.47, 160.28, 159.92, 149.55, 146.60, 139.06, 137.19, 135.22, 131.90, 131.32, 130.15, 129.18, 128.74, 128.59, 128.09, 128.08, 122.29, 116.96, 114.55, 105.36, 97.88, 52.92, 50.67, 35.11, 34.81, 31.29, 29.89. HRMS (ESI-TOF) calcd for  $\text{C}_{33}\text{H}_{32}\text{BrNO}_4$   $[\text{M} + \text{H}]^+$ : 586.1587; found: 586.1592.

#### 5.4 General procedure for the syntheses of **4**

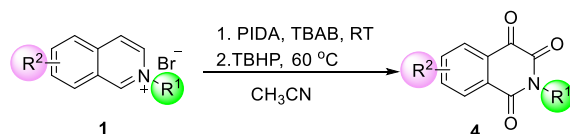

To the mixture of *N*-alkyl iminium salt **1** (0.3 mmol), PIDA (0.9 mmol), TBAB (0.3 mmol) was added dry MeCN (2 mL) and  $\text{H}_2\text{O}$  (5.5  $\mu\text{L}$ ) in a 5 mL reaction flask. The mixture was continually stirred at room temperature until **1** was consumed as indicated by TLC (typically, for 8 h). TBHP (0.6 mmol, in decane) was added. The reaction mixture was heated at 60 °C in the oil bath until the intermediate was consumed as indicated by TLC (typically, for 48 h), then cooled to room temperature, diluted with water (5 mL), and extracted with ethyl acetate (3  $\times$  5 mL). The combined organic layer was washed with brine, dried over  $\text{Na}_2\text{SO}_4$ , filtered, and concentrated under reduced pressure. The crude product was purified by column chromatography on silica gel (petroleum ether/ethyl acetate as the eluent) to give the desired product **4**.

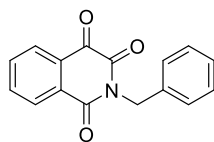

**2-benzylisoquinoline-1,3,4(2H)-trione (4a)** <sup>[5]</sup>. Purification by flash column chromatography eluting with petroleum ether/ethyl acetate (5/1, v/v) gave **4a** (76mg, 96%) as a light yellow solid.  $^1\text{H}$  NMR (600 MHz, Chloroform-*d*)  $\delta$  8.35 (dd,  $J = 7.8, 1.2$  Hz, 1H), 8.20 (dd,  $J = 7.7, 1.3$  Hz, 1H), 7.89 (td,  $J = 7.6, 1.4$  Hz, 1H), 7.82 (td,  $J = 7.6, 1.3$  Hz, 1H), 7.52 – 7.48 (m, 2H), 7.33 – 7.29 (m, 2H), 7.29 – 7.27 (m, 1H), 5.24 (s, 2H).  $^{13}\text{C}$  NMR (151 MHz, Chloroform-*d*)  $\delta$  174.60, 162.15, 156.98, 136.03, 135.90, 134.47, 130.86, 129.94, 129.89, 129.41, 128.61, 128.04, 127.80, 44.34.

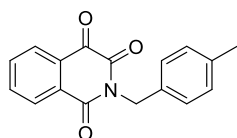

**2-(4-methylbenzyl)isoquinoline-1,3,4(2H)-trione (4b)** <sup>[5]</sup>. Purification by flash column chromatography eluting with petroleum ether/ethyl acetate (5/1, v/v) gave **4b** (70mg, 84%) as a light yellow solid. <sup>1</sup>H NMR (600 MHz, Chloroform-*d*) δ 8.35 (d, *J* = 7.8 Hz, 1H), 8.20 (d, *J* = 7.7 Hz, 1H), 7.91 – 7.87 (m, 1H), 7.83 – 7.79 (m, 1H), 7.40 (d, *J* = 7.7 Hz, 2H), 7.12 (d, *J* = 7.7 Hz, 2H), 5.21 (s, 2H), 2.30 (s, 3H). <sup>13</sup>C NMR (151 MHz, Chloroform-*d*) δ 174.66, 162.14, 157.01, 137.86, 136.02, 134.43, 132.95, 130.83, 129.93, 129.44, 129.27, 127.77, 44.10, 21.11.

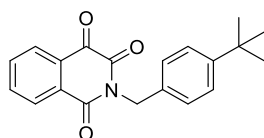

**2-(4-(tert-butyl)benzyl)isoquinoline-1,3,4(2H)-trione (4c)** <sup>[5]</sup>. Purification by flash column chromatography eluting with petroleum ether/ethyl acetate (5/1, v/v) gave **4c** (78mg, 81%) as a light light yellow solid. <sup>1</sup>H NMR (600 MHz, Chloroform-*d*) δ 8.35 (dd, *J* = 7.8, 1.2 Hz, 1H), 8.19 (dd, *J* = 7.8, 1.2 Hz, 1H), 7.88 (td, *J* = 7.5, 1.3 Hz, 1H), 7.81 (td, *J* = 7.8, 1.2 Hz, 1H), 7.45 (d, *J* = 8.4 Hz, 2H), 7.33 (d, *J* = 8.4 Hz, 2H), 5.21 (s, 3H), 1.28 (s, 9H). <sup>13</sup>C NMR (151 MHz, Chloroform-*d*) δ 174.68, 162.16, 157.02, 151.07, 136.03, 134.44, 132.90, 130.82, 129.93, 129.28, 129.26, 127.76, 125.52, 43.99, 34.53, 31.28.

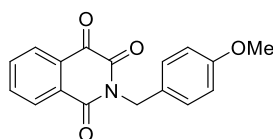

**2-(4-methoxybenzyl)isoquinoline-1,3,4(2H)-trione (4d)** <sup>[5]</sup>. Purification by flash column chromatography eluting with petroleum ether/ethyl acetate (5/1, v/v) gave **4d** (69mg, 78%) as a light yellow solid. <sup>1</sup>H NMR (600 MHz, Chloroform-*d*) δ 8.35 (d, *J* = 7.8 Hz, 1H), 8.19 (d, *J* = 7.7 Hz, 1H), 7.89 (t, *J* = 7.6 Hz, 1H), 7.81 (t, *J* = 7.6 Hz, 1H), 7.47 (d, *J* = 8.3 Hz, 2H), 6.83 (d, *J* = 8.6 Hz, 2H), 5.18 (s, 2H), 3.77 (s, 3H). <sup>13</sup>C NMR (151 MHz, Chloroform-*d*) δ 174.68, 162.15, 159.40, 156.96, 136.00, 134.41, 131.07, 130.84, 129.94, 129.90, 128.17, 127.76, 113.94, 55.25, 43.79.

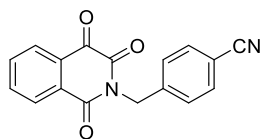

**4-((1,3,4-trioxo-3,4-dihydroisoquinolin-2(1H)-yl)methyl)benzonitrile (4e)** <sup>[5]</sup>. Purification by flash column chromatography eluting with petroleum ether/ethyl acetate (5/1, v/v) gave **4e** (63mg, 72%) as a light yellow solid. <sup>1</sup>H NMR (600 MHz, Chloroform-*d*) δ 8.36 (dd, *J* = 7.8, 1.2 Hz, 1H), 8.23 (dd, *J* = 7.5, 1.2 Hz, 1H), 7.93 (td, *J* = 7.5, 1.2 Hz, 1H), 7.86 (td, *J* = 7.5, 1.2 Hz, 1H), 7.61 (s, 4H), 5.28 (s, 2H). <sup>13</sup>C NMR (151 MHz, Chloroform-*d*) δ 174.22, 162.12, 156.89, 140.85, 136.24, 134.82, 132.46, 130.86, 130.05, 129.51, 128.02, 118.43, 112.11, 43.92.

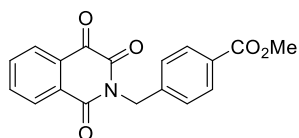

**methyl 4-((1,3,4-trioxo-3,4-dihydroisoquinolin-2(1H)-yl)methyl)benzoate (4f)** <sup>[5]</sup>. Purification by flash column chromatography eluting with petroleum ether/ethyl acetate (5/1, v/v) gave **4f** (81mg, 72%) as a light yellow solid. <sup>1</sup>H NMR (600 MHz, Chloroform-*d*)  $\delta$  8.36 (dd,  $J = 7.8, 1.2$  Hz, 1H), 8.22 (dd,  $J = 7.8, 1.2$  Hz, 1H), 7.98 (d,  $J = 8.4$  Hz, 2H), 7.91 (td,  $J = 7.5, 1.2$  Hz, 1H), 7.84 (td,  $J = 7.5, 1.2$  Hz, 1H), 7.55 (d,  $J = 8.4$  Hz, 2H), 5.28 (s, 2H), 3.89 (s, 3H). <sup>13</sup>C NMR (151 MHz, Chloroform-*d*)  $\delta$  174.40, 166.65, 162.12, 156.93, 130.87, 130.01, 129.93, 129.87, 129.69, 129.18, 127.92, 52.10, 44.04.

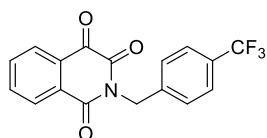

**2-(4-(trifluoromethyl)benzyl)isoquinoline-1,3,4(2H)-trione (4g)** <sup>[6]</sup>. Purification by flash column chromatography eluting with petroleum ether/ethyl acetate (5/1, v/v) gave **4g** (64mg, 64%) as a light yellow solid. <sup>1</sup>H NMR (600 MHz, Chloroform-*d*)  $\delta$  8.36 (dd,  $J = 7.8, 1.8$  Hz, 1H), 8.22 (dd,  $J = 7.8, 1.2$  Hz, 1H), 7.92 (td,  $J = 7.5, 1.4$  Hz, 1H), 7.84 (td,  $J = 7.5, 1.4$  Hz, 1H), 7.62 (d,  $J = 8.4$  Hz, 2H), 7.57 (d,  $J = 8.4$  Hz, 2H), 5.29 (s, 2H). <sup>13</sup>C NMR (151 MHz, Chloroform-*d*)  $\delta$  174.34, 162.13, 156.92, 139.67, 136.17, 134.70, 130.85, 130.32 (q,  $J = 32.5$  Hz), 130.01, 129.70, 129.63, 127.94, 125.59 (q,  $J = 3.8$  Hz), 123.95 (q,  $J = 271.8$  Hz), 43.85. <sup>19</sup>F NMR (565 MHz, Chloroform-*d*)  $\delta$  -62.73.

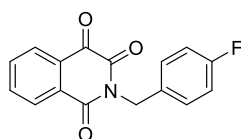

**2-(4-fluorobenzyl)isoquinoline-1,3,4(2H)-trione (4h)** <sup>[5]</sup>. Purification by flash column chromatography eluting with petroleum ether/ethyl acetate (5/1, v/v) gave **4h** (64mg, 67%) as a light yellow solid. <sup>1</sup>H NMR (600 MHz, Chloroform-*d*)  $\delta$  8.35 (d,  $J = 7.8$  Hz, 1H), 8.21 (d,  $J = 7.8$  Hz, 1H), 7.91 (t,  $J = 7.5$  Hz, 1H), 7.83 (t,  $J = 7.5$  Hz, 1H), 7.51 (td,  $J = 7.8$  Hz, 1.8 Hz 2H), 6.99 (td,  $J = 8.6, 1.7$  Hz, 2H), 5.20 (s, 2H). <sup>13</sup>C NMR (151 MHz, Chloroform-*d*)  $\delta$  174.52, 162.48 (d,  $J = 247.03$  Hz), 162.13, 156.94, 136.10, 134.57, 131.72 (d,  $J = 3.2$  Hz), 131.50 (d,  $J = 7.8$  Hz), 130.83, 129.96, 129.78, 127.86, 115.54 (d,  $J = 21.1$  Hz), 115.40, 43.60. <sup>19</sup>F NMR (565 MHz, Chloroform-*d*)  $\delta$  -113.75.

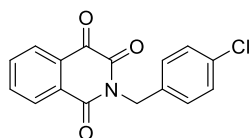

**2-(4-chlorobenzyl)isoquinoline-1,3,4(2H)-trione (4i)** <sup>[5]</sup>. Purification by flash column chromatography eluting with petroleum ether/ethyl acetate (5/1, v/v) gave **4i** (73mg, 81%) as a light yellow solid. <sup>1</sup>H NMR (600 MHz, Chloroform-*d*)  $\delta$  8.35 (d,  $J = 7.8$  Hz, 1H), 8.21 (d,  $J = 7.8$  Hz, 1H), 7.90 (t,  $J = 7.5$  Hz, 1H), 7.83 (t,  $J = 7.8$  Hz, 1H), 7.45 (d,  $J = 7.8$  Hz, 2H), 7.28 (d,  $J = 8.4$  Hz, 2H), 5.20 (s, 2H). <sup>13</sup>C NMR (151 MHz, Chloroform-*d*)  $\delta$  174.46, 162.11, 156.93, 136.12, 134.61, 134.31, 134.06, 130.97, 130.83, 129.97, 129.73, 128.79, 127.89, 43.67.

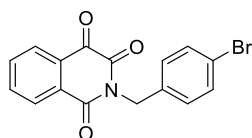

**2-(4-bromobenzyl)isoquinoline-1,3,4(2H)-trione (4j)** <sup>[5]</sup>. Purification by flash column chromatography eluting with petroleum ether/ethyl acetate (5/1, v/v) gave **4j** (86mg, 83%) as a light yellow solid. <sup>1</sup>H NMR (600 MHz, Chloroform-*d*) δ 8.35 (d, *J* = 7.8 Hz, 1H), 8.21 (d, *J* = 7.8 Hz, 1H), 7.91 (t, *J* = 7.8 Hz, 1H), 7.83 (t, *J* = 7.5 Hz, 1H), 7.44 (d, *J* = 8.4 Hz, 2H), 7.39 (d, *J* = 8.4 Hz, 2H), 5.19 (s, 2H). <sup>13</sup>C NMR (151 MHz, Chloroform-*d*) δ 174.45, 162.11, 156.94, 136.14, 134.80, 134.63, 131.77, 131.28, 130.82, 129.98, 129.72, 127.90, 122.22, 43.74.

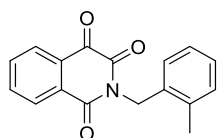

**2-(2-methylbenzyl)isoquinoline-1,3,4(2H)-trione (4k)** <sup>[5]</sup>. Purification by flash column chromatography eluting with petroleum ether/ethyl acetate (5/1, v/v) gave **4k** (77mg, 92%) as a light yellow solid. <sup>1</sup>H NMR (600 MHz, Chloroform-*d*) δ 8.36 (d, *J* = 7.8 Hz, 1H), 8.24 (dd, *J* = 7.8 Hz, 1.2 Hz, 1H), 7.92 (td, *J* = 7.8 Hz, 1.2 Hz, 1H), 7.85 (td, *J* = 7.8 Hz, 1.2 Hz, 1H), 7.19 – 7.08 (m, 4H), 5.27 (s, 2H), 2.51 (s, 3H). <sup>13</sup>C NMR (151 MHz, Chloroform-*d*) δ 174.60, 162.27, 157.17, 136.17, 136.12, 134.55, 133.71, 130.91, 130.54, 130.05, 129.90, 127.87, 127.60, 126.93, 126.17, 41.83, 19.44.

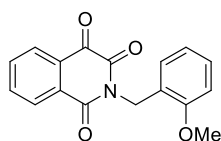

**2-(2-methoxybenzyl)isoquinoline-1,3,4(2H)-trione (4l)**. Purification by flash column chromatography eluting with petroleum ether/ethyl acetate (5/1, v/v) gave **4l** (71mg, 80%) as a light yellow solid. mp 168 - 170 °C. <sup>1</sup>H NMR (600 MHz, Chloroform-*d*) δ 8.34 (d, *J* = 7.8 Hz, 1H), 8.23 (d, *J* = 7.8 Hz, 1H), 7.89 (t, *J* = 7.5 Hz, 1H), 7.83 (t, *J* = 7.5 Hz, 1H), 7.23 (t, *J* = 7.8 Hz, 1H), 7.14 (d, *J* = 7.8 Hz, 1H), 6.87 (dd, *J* = 7.8, 4.8 Hz, 2H), 5.29 (s, 2H), 3.84 (s, 3H). <sup>13</sup>C NMR (151 MHz, Chloroform-*d*) δ 174.84, 162.08, 157.28, 156.99, 136.02, 134.37, 130.94, 130.05, 129.94, 128.79, 128.43, 127.77, 123.70, 120.43, 110.62, 55.52, 40.12. HRMS (ESI-TOF) calcd for C<sub>17</sub>H<sub>13</sub>NO<sub>4</sub> [M + H]<sup>+</sup>: 296.0917; found: 296.0915.

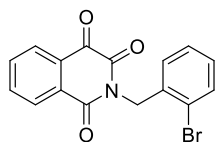

**2-(2-bromobenzyl)isoquinoline-1,3,4(2H)-trione (4m)** <sup>[5]</sup>. Purification by flash column chromatography eluting with petroleum ether/ethyl acetate (5/1, v/v) gave **4m** (85mg, 82%) as a light yellow solid. <sup>1</sup>H NMR (600 MHz, Chloroform-*d*) δ 8.36 (d, *J* = 7.2 Hz, 1H), 8.26 (d, *J* = 7.8 Hz, 1H), 7.93 (t, *J* = 7.5 Hz, 1H), 7.87 (t, *J* = 7.5 Hz, 1H), 7.58 (d, *J* = 7.8 Hz, 1H), 7.21 (t, *J* = 7.5 Hz, 1H), 7.12 (t, *J* = 7.8 Hz, 1H), 7.06 (d, *J* = 7.8 Hz, 1H), 5.35 (s, 2H). <sup>13</sup>C NMR (151 MHz, Chloroform-*d*) δ 174.43, 162.05, 156.99, 136.22, 134.72, 134.50, 133.11, 130.96, 130.11, 129.69, 129.02, 127.98, 127.60, 127.56, 123.02, 44.77.

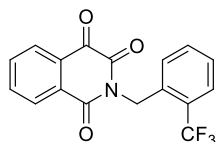

**2-(2-(trifluoromethyl)benzyl)isoquinoline-1,3,4(2H)-trione (4n).** Purification by flash column chromatography eluting with petroleum ether/ethyl acetate (5/1, v/v) gave **4n** (73mg, 73%) as a light yellow solid. mp 210 - 212 °C.  $^1\text{H}$  NMR (600 MHz, Chloroform-*d*)  $\delta$  8.37 (d,  $J$  = 7.8 Hz, 1H), 8.28 (d,  $J$  = 7.2 Hz, 1H), 7.94 (t,  $J$  = 7.5 Hz, 1H), 7.89 (t,  $J$  = 7.5 Hz, 1H), 7.71 (d,  $J$  = 7.8 Hz, 1H), 7.43 (t,  $J$  = 7.8 Hz, 1H), 7.36 (t,  $J$  = 7.8 Hz, 1H), 7.07 (d,  $J$  = 7.8 Hz, 1H), 5.48 (s, 2H).  $^{13}\text{C}$  NMR (151 MHz, Chloroform-*d*)  $\delta$  174.31, 162.09, 157.02, 136.28, 134.82, 133.97, 132.11, 131.00, 130.13, 129.58, 128.04, 127.74 (q,  $J$  = 30.9 Hz), 127.40, 127.03, 126.42 (q,  $J$  = 5.7 Hz), 124.30 (q,  $J$  = 274.2 Hz), 41.36 (q,  $J$  = 3.6 Hz).  $^{19}\text{F}$  NMR (565 MHz, Chloroform-*d*)  $\delta$  -60.42. HRMS (ESI-TOF) calcd for  $\text{C}_{17}\text{H}_{10}\text{F}_3\text{NO}_3$  [M + H] $^+$ : 334.0686; found: 334.0681.

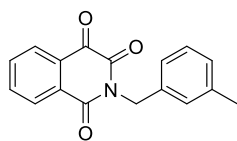

**2-(3-methylbenzyl)isoquinoline-1,3,4(2H)-trione (4o)** <sup>[5]</sup>. Purification by flash column chromatography eluting with petroleum ether/ethyl acetate (5/1, v/v) gave **4o** (66mg, 79%) as a light yellow solid.  $^1\text{H}$  NMR (600 MHz, Chloroform-*d*)  $\delta$  8.36 (dd,  $J$  = 7.8 Hz, 1.2 Hz, 1H), 8.21 (dd,  $J$  = 7.8 Hz, 1.2 Hz, 1H), 7.89 (td,  $J$  = 7.8 Hz, 1.2 Hz, 1H), 7.82 (td,  $J$  = 7.5 Hz, 1.2 Hz, 1H), 7.30 (d,  $J$  = 9.0 Hz, 2H), 7.20 (t,  $J$  = 7.5 Hz, 1H), 7.08 (d,  $J$  = 7.5 Hz, 1H), 5.21 (s, 2H), 2.32 (s, 3H).  $^{13}\text{C}$  NMR (151 MHz, Chloroform-*d*)  $\delta$  174.65, 162.14, 157.02, 138.34, 136.04, 135.78, 134.46, 130.85, 130.02, 129.97, 129.93, 128.80, 128.50, 127.80, 126.43, 44.33, 21.33.

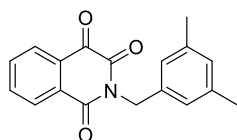

**2-(3,5-dimethylbenzyl)isoquinoline-1,3,4(2H)-trione (4p)** <sup>[5]</sup>. Purification by flash column chromatography eluting with petroleum ether/ethyl acetate (5/1, v/v) gave **4p** (60mg, 68%) as a light yellow solid.  $^1\text{H}$  NMR (600 MHz, Chloroform-*d*)  $\delta$  8.34 (d,  $J$  = 7.8 Hz, 1H), 8.19 (d,  $J$  = 7.2 Hz, 1H), 7.89 (t,  $J$  = 7.8 Hz, 1H), 7.81 (t,  $J$  = 7.5 Hz, 1H), 7.10 (s, 2H), 6.89 (s, 1H), 5.16 (s, 2H), 2.27 (s, 6H).  $^{13}\text{C}$  NMR (151 MHz, Chloroform-*d*)  $\delta$  174.66, 162.13, 156.99, 138.19, 135.99, 135.74, 134.40, 130.86, 129.96, 129.95, 129.66, 127.74, 127.07, 44.26, 21.20.

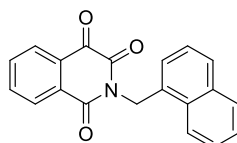

**2-(naphthalen-1-ylmethyl)isoquinoline-1,3,4(2H)-trione (4q).** Purification by flash column chromatography eluting with petroleum ether/ethyl acetate (5/1, v/v) gave **4q** (68mg, 72%) as a light yellow solid. mp 188 - 190 °C.  $^1\text{H}$  NMR (600 MHz, Chloroform-*d*)  $\delta$  8.33 (d,  $J$  = 7.8 Hz, 1H), 8.26 (d,  $J$  = 8.4 Hz, 1H), 8.21 (d,  $J$  = 7.2 Hz, 1H), 7.91 - 7.83 (m, 2H), 7.81 (t,  $J$  = 7.5 Hz, 1H), 7.77 (d,  $J$  = 7.8 Hz, 1H), 7.57 (t,  $J$  = 7.8 Hz, 1H), 7.49 (t,  $J$  = 7.5 Hz, 1H), 7.44 (d,  $J$  = 7.2 Hz, 1H), 7.37 (t,  $J$  = 7.5 Hz,



1H), 5.73 (s, 2H). <sup>13</sup>C NMR (151 MHz, Chloroform-*d*) δ 174.52, 162.33, 157.24, 136.10, 134.55, 133.79, 131.23, 130.88, 130.07, 129.88, 128.83, 128.54, 127.83, 126.53, 126.02, 125.85, 125.22, 123.34, 41.95. HRMS (ESI-TOF) calcd for C<sub>20</sub>H<sub>13</sub>NO<sub>3</sub> [M + H]<sup>+</sup>: 316.0968; found: 316.0967

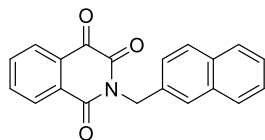

**2-(naphthalen-2-ylmethyl)isoquinoline-1,3,4(2H)-trione (4r).** Purification by flash column chromatography eluting with petroleum ether/ethyl acetate (5/1, v/v) gave **4r** (78mg, 80%) as a light yellow solid. mp 186 - 188 °C. <sup>1</sup>H NMR (600 MHz, Chloroform-*d*) δ 8.35 (dd, *J* = 7.8, 1.8 Hz, 1H), 8.20 (dd, *J* = 7.7, 1.2 Hz, 1H), 7.97 (s, 1H), 7.88 (td, *J* = 7.5, 1.4 Hz, 1H), 7.83 – 7.79 (m, 2H), 7.78 (d, *J* = 8.4 Hz, 2H), 7.61 (dd, *J* = 8.4, 1.8 Hz, 1H), 7.44 (qd, *J* = 6.6, 2.1 Hz, 2H), 5.40 (s, 2H). <sup>13</sup>C NMR (151 MHz, Chloroform-*d*) δ 174.60, 162.19, 157.08, 136.05, 134.49, 133.26, 132.96, 130.85, 129.97, 129.87, 128.70, 128.37, 128.00, 127.82, 127.60, 127.04, 126.23, 126.22, 44.52. HRMS (ESI-TOF) calcd for C<sub>20</sub>H<sub>13</sub>NO<sub>3</sub> [M + H]<sup>+</sup>: 316.0968; found: 316.0967

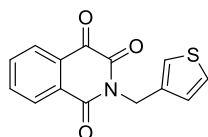

**2-(thiophen-3-ylmethyl)isoquinoline-1,3,4(2H)-trione (4s).** Purification by flash column chromatography eluting with petroleum ether/ethyl acetate (5/1, v/v) gave **4s** (63mg, 77%) as a light yellow solid. mp 154 - 156 °C. <sup>1</sup>H NMR (600 MHz, Chloroform-*d*) δ 8.34 (dd, *J* = 7.8, 1.2 Hz, 1H), 8.19 (dd, *J* = 7.5, 1.5 Hz, 1H), 7.89 (td, *J* = 7.8, 1.2 Hz, 1H), 7.81 (td, *J* = 7.8, 1.4 Hz, 1H), 7.43 (dd, *J* = 2.7, 1.5 Hz, 1H), 7.22 (dd, *J* = 4.8, 3.0 Hz, 1H), 7.20 (dd, *J* = 4.8, 1.2 Hz, 1H), 5.21 (s, 2H). <sup>13</sup>C NMR (151 MHz, Chloroform-*d*) δ 174.61, 161.94, 156.72, 136.03, 135.90, 134.47, 130.86, 129.87, 129.84, 128.76, 127.79, 125.76, 125.73, 38.94. HRMS (ESI-TOF) calcd for C<sub>14</sub>H<sub>9</sub>NO<sub>3</sub>S [M + H]<sup>+</sup>: 272.0376; found: 232.0374.

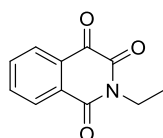

**2-ethylisoquinoline-1,3,4(2H)-trione (4t)** <sup>[7]</sup>. Purification by flash column chromatography eluting with petroleum ether/ethyl acetate (5/1, v/v) gave **4t** (49mg, 80%) as a light yellow solid. <sup>1</sup>H NMR (600 MHz, Chloroform-*d*) δ 8.35 (t, *J* = 7.5 Hz, 1H), 8.21 (t, *J* = 7.2 Hz, 1H), 7.91 (td, *J* = 7.8, 1.4 Hz, 1H), 7.83 (td, *J* = 7.5, 1.6 Hz, 1H), 4.13 (t, *J* = 7.5 Hz, 2H), 1.30 (q, *J* = 7.4 Hz, 3H). <sup>13</sup>C NMR (151 MHz, Chloroform-*d*) δ 174.74, 161.96, 156.82, 136.00, 134.36, 130.83, 130.03, 129.76 (d, *J* = 2.1 Hz), 127.75 (d, *J* = 2.6 Hz), 36.40 (d, *J* = 1.9 Hz), 13.18.

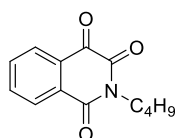

**2-butylisoquinoline-1,3,4(2H)-trione (4u)** <sup>[8]</sup>. Purification by flash column chromatography eluting with petroleum ether/ethyl acetate (5/1, v/v) gave **4u** (51mg, 73%) as a light yellow solid. <sup>1</sup>H NMR (600 MHz, Chloroform-*d*) δ 8.35 (d, *J* = 7.8 Hz, 1H), 8.21 (d, *J* = 7.8 Hz, 1H), 7.91 (t, *J* = 7.5 Hz, 1H),

7.83 (t,  $J = 7.5$  Hz, 1H), 4.06 (t,  $J = 7.5$  Hz, 2H), 1.70 – 1.64 (m, 2H), 1.44 – 1.38 (m, 2H), 0.97 (t,  $J = 7.3$  Hz, 3H).  $^{13}\text{C}$  NMR (151 MHz, Chloroform-*d*)  $\delta$  174.69, 162.15, 157.00, 135.95, 134.30, 130.88, 130.03, 129.76, 127.68, 41.00, 29.97, 20.18, 13.65.

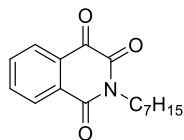

**2-heptylisoquinoline-1,3,4(2H)-trione (4v).** Purification by flash column chromatography eluting with petroleum ether/ethyl acetate (5/1, v/v) gave **4v** (62mg, 76%) as a yellow solid. mp 68 – 70 °C.  $^1\text{H}$  NMR (600 MHz, Chloroform-*d*)  $\delta$  8.35 (d,  $J = 7.8$  Hz, 1H), 8.21 (d,  $J = 7.8$  Hz, 1H), 7.91 (t,  $J = 7.5$  Hz, 1H), 7.83 (t,  $J = 7.5$  Hz, 1H), 4.05 (t,  $J = 7.8$  Hz, 2H), 1.70 – 1.65 (m, 2H), 1.41 – 1.23 (m, 8H), 0.88 (t,  $J = 6.8$  Hz, 3H).  $^{13}\text{C}$  NMR (151 MHz, Chloroform-*d*)  $\delta$  174.71, 162.15, 157.00, 135.96, 134.30, 130.88, 130.04, 129.78, 127.70, 41.27, 31.65, 28.86, 27.91, 26.90, 22.53, 13.99. HRMS (ESI-TOF) calcd for  $\text{C}_{16}\text{H}_{19}\text{NO}_3$  [ $\text{M} + \text{H}$ ] $^+$ : 274.1438; found: 274.1435.

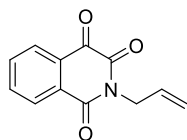

**2-allylisoquinoline-1,3,4(2H)-trione (4w)** [8]. Purification by flash column chromatography eluting with petroleum ether/ethyl acetate (5/1, v/v) gave **4w** (48mg, 74%) as a brown solid.  $^1\text{H}$  NMR (600 MHz, Chloroform-*d*)  $\delta$  8.36 (dd,  $J = 7.8, 1.5$  Hz, 1H), 8.23 (dd,  $J = 7.5, 1.5$  Hz, 1H), 7.92 (td,  $J = 7.5, 1.2$  Hz, 1H), 7.85 (td,  $J = 7.8, 1.2$  Hz, 1H), 5.95 – 5.89 (m, 1H), 5.36 (dd,  $J = 17.1, 1.5$  Hz, 1H), 5.25 (dd,  $J = 10.2, 1.2$  Hz, 1H), 4.68 (d,  $J = 6.6$  Hz, 2H).  $^{13}\text{C}$  NMR (151 MHz, Chloroform-*d*)  $\delta$  174.62, 161.87, 156.71, 136.08, 134.49, 130.88, 130.84, 129.88, 129.88, 127.85, 119.25, 43.16.

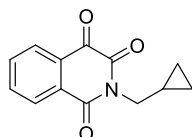

**2-(cyclopropylmethyl)isoquinoline-1,3,4(2H)-trione (4x).** Purification by flash column chromatography eluting with petroleum ether/ethyl acetate (5/1, v/v) gave **4x** (57mg, 83%) as a light yellow solid. mp 76 – 78 °C.  $^1\text{H}$  NMR (600 MHz, Chloroform-*d*)  $\delta$  8.35 (d,  $J = 7.2$  Hz, 1H), 8.21 (d,  $J = 7.8$  Hz, 1H), 7.90 (t,  $J = 7.8$  Hz, 1H), 7.82 (t,  $J = 7.5$  Hz, 1H), 3.95 (dd,  $J = 7.2, 2.4$  Hz, 2H), 1.29–1.23 (m, 1H), 0.51–0.48 (m, 2H), 0.45 – 0.42 (m, 2H).  $^{13}\text{C}$  NMR (151 MHz, Chloroform-*d*)  $\delta$  174.82, 162.39, 157.25, 135.97, 134.33, 130.92, 130.06, 129.82, 127.72, 45.64, 10.00, 3.95. HRMS (ESI-TOF) calcd for  $\text{C}_{13}\text{H}_{11}\text{NO}_3$  [ $\text{M} + \text{H}$ ] $^+$ : 230.0812; found: 230.0811.

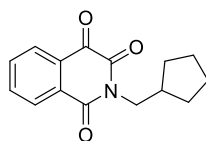

**2-(cyclopentylmethyl)isoquinoline-1,3,4(2H)-trione (4y).** Purification by flash column chromatography eluting with petroleum ether/ethyl acetate (5/1, v/v) gave **4y** (54mg, 70%) as a

light yellow solid. mp 95 - 97 °C.  $^1\text{H}$  NMR (600 MHz, Chloroform-*d*)  $\delta$  8.35 (d,  $J$  = 7.6 Hz, 1H), 8.21 (d,  $J$  = 7.8 Hz, 1H), 7.91 (t,  $J$  = 7.5 Hz, 1H), 7.84 (t,  $J$  = 7.5 Hz, 1H), 4.05 (d,  $J$  = 7.6 Hz, 2H), 2.41 - 2.34 (m, 1H), 1.74 - 1.66 (m, 4H), 1.58 - 1.51 (m, 2H), 1.36 - 1.58 (m, 2H).  $^{13}\text{C}$  NMR (151 MHz, Chloroform-*d*)  $\delta$  174.71, 162.47, 157.32, 135.96, 134.30, 130.92, 130.03, 129.85, 127.66, 45.41, 38.80, 30.37, 24.77. HRMS (ESI-TOF) calcd for  $\text{C}_{15}\text{H}_{15}\text{NO}_3$  [ $\text{M} + \text{H}$ ] $^+$ : 258.1125; found: 258.1125.

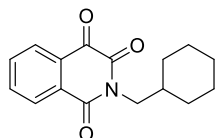

**2-(cyclohexylmethyl)isoquinoline-1,3,4(2H)-trione (4z).** Purification by flash column chromatography eluting with petroleum ether/ethyl acetate (5/1, v/v) gave **4z** (52mg, 64%) as a yellow solid. mp 122 - 124 °C.  $^1\text{H}$  NMR (600 MHz, Chloroform-*d*)  $\delta$  8.35 (d,  $J$  = 7.8 Hz, 1H), 8.22 (d,  $J$  = 7.6 Hz, 1H), 7.91 (t,  $J$  = 7.8 Hz, 1H), 7.83 (t,  $J$  = 7.5 Hz, 1H), 3.95 (dd,  $J$  = 7.2, 3.0 Hz, 2H), 1.85 - 1.78 (m, 1H), 1.74 - 1.70 (m, 2H), 1.69 - 1.62 (m, 3H), 1.23 - 1.15 (m, 3H), 1.10 - 1.04 (m,  $J$  = 12.0 Hz, 2H).  $^{13}\text{C}$  NMR (151 MHz, Chloroform-*d*)  $\delta$  174.67, 162.50, 157.34, 135.98, 134.32, 130.92, 129.98, 129.89, 127.69, 46.88, 36.52, 30.82, 26.20, 25.73. HRMS (ESI-TOF) calcd for  $\text{C}_{16}\text{H}_{17}\text{NO}_3$  [ $\text{M} + \text{H}$ ] $^+$ : 272.1281; found: 272.1281.

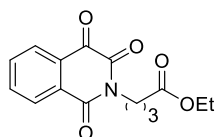

**ethyl 4-(1,3,4-trioxo-3,4-dihydroisoquinolin-2(1H)-yl)butanoate (4aa).** Purification by flash column chromatography eluting with petroleum ether/ethyl acetate (5/1, v/v) gave **4aa** (58mg, 67%) as yellow oil.  $^1\text{H}$  NMR (600 MHz, Chloroform-*d*)  $\delta$  8.34 (dd,  $J$  = 8.7, 4.5 Hz, 1H), 8.21 (dd,  $J$  = 8.4, 4.2 Hz, 1H), 7.91 (t,  $J$  = 7.8 Hz, 1H), 7.84 (t,  $J$  = 7.8 Hz, 1H), 4.17 - 4.06 (m, 4H), 2.42-2.37 (m, 2H), 2.06 - 2.00 (m, 2H), 1.26 - 1.20 (m, 3H).  $^{13}\text{C}$  NMR (151 MHz, Chloroform-*d*)  $\delta$  174.52, 172.57, 162.20, 157.08, 135.99, 134.41, 130.87, 129.89, 129.79, 127.73, 60.49, 40.41, 31.75, 23.15, 14.15. HRMS (ESI-TOF) calcd for  $\text{C}_{15}\text{H}_{15}\text{NO}_5$  [ $\text{M} + \text{H}$ ] $^+$ : 290.1023; found: 290.1022.

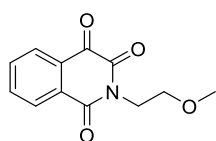

**2-(2-methoxyethyl)isoquinoline-1,3,4(2H)-trione (4ab).** Purification by flash column chromatography eluting with petroleum ether/ethyl acetate (5/1, v/v) gave **4ab** (47mg, 67%) as yellow oil.  $^1\text{H}$  NMR (600 MHz, Chloroform-*d*)  $\delta$  8.37 (d,  $J$  = 7.8 Hz, 1H), 8.23 (d,  $J$  = 7.8 Hz, 1H), 7.91 (t,  $J$  = 7.8 Hz, 1H), 7.83 (t,  $J$  = 7.5 Hz, 1H), 4.33 (t,  $J$  = 5.7 Hz, 2H), 3.69 (t,  $J$  = 5.7 Hz, 2H), 3.35 (s, 3H).  $^{13}\text{C}$  NMR (151 MHz, Chloroform-*d*)  $\delta$  174.53, 162.25, 157.10, 135.99, 134.41, 130.92, 129.91, 127.76, 69.03, 58.69, 39.96. HRMS (ESI-TOF) calcd for  $\text{C}_{12}\text{H}_{11}\text{NO}_4$  [ $\text{M} + \text{H}$ ] $^+$ : 234.0761; found: 234.0758.

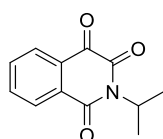

**2-isopropylisoquinoline-1,3,4(2H)-trione (4ac)** <sup>[9]</sup>. Purification by flash column chromatography

eluting with petroleum ether/ethyl acetate (5/1, v/v) gave **4ac** (45mg, 69%) as a light yellow solid. mp 134 - 136 °C. <sup>1</sup>H NMR (600 MHz, Chloroform-*d*) δ 8.34 (d, *J* = 7.8 Hz, 1H), 8.19 (d, *J* = 7.8 Hz, 1H), 7.90 (t, *J* = 7.5 Hz, 1H), 7.81 (t, *J* = 7.5 Hz, 1H), 5.23 - 5.18 (m, 1H), 1.54 (dd, *J* = 7.2, 2.4 Hz, 6H). <sup>13</sup>C NMR (151 MHz, Chloroform-*d*) δ 174.96, 162.37, 157.27, 135.93, 134.14, 130.86, 130.59, 129.82, 127.47, 46.68, 19.58.

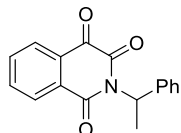

**2-(1-phenylethyl)isoquinoline-1,3,4(2H)-trione (4ad).** Purification by flash column chromatography eluting with petroleum ether/ethyl acetate (5/1, v/v) gave **4ad** (46mg, 55%) as a light yellow solid. mp 146 - 148 °C. <sup>1</sup>H NMR (600 MHz, Chloroform-*d*) δ 8.31 (d, *J* = 7.2 Hz, 1H), 8.18 (d, *J* = 7.8 Hz, 1H), 7.87 (t, *J* = 7.2 Hz, 1H), 7.80 (t, *J* = 7.2 Hz, 1H), 7.48 (d, *J* = 7.2 Hz, 2H), 7.32 (t, *J* = 7.5 Hz, 2H), 7.24 (d, *J* = 6.9 Hz, 1H), 6.30 (d, *J* = 7.8 Hz, 1H), 1.94 (d, *J* = 6.6 Hz, 3H). <sup>13</sup>C NMR (151 MHz, Chloroform-*d*) δ 174.74, 162.15, 157.03, 139.27, 136.00, 134.31, 130.89 (d, *J* = 2.7 Hz), 130.33 (d, *J* = 3.3 Hz), 129.99 (d, *J* = 3.0 Hz), 128.27 (d, *J* = 2.1 Hz), 127.62, 127.55 (d, *J* = 3.5 Hz), 51.80 (d, *J* = 4.0 Hz), 16.35. HRMS (ESI-TOF) calcd for C<sub>17</sub>H<sub>13</sub>NO<sub>3</sub> [M + H]<sup>+</sup>: 280.0968; found: 280.0967.

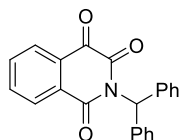

**2-benzhydrylisoquinoline-1,3,4(2H)-trione (4ae).** Purification by flash column chromatography eluting with petroleum ether/ethyl acetate (5/1, v/v) gave **4ae** (31mg, 30%) as a light yellow solid. mp 214 - 216 °C. <sup>1</sup>H NMR (600 MHz, Chloroform-*d*) δ 8.32 (d, *J* = 7.8 Hz, 1H), 8.20 (d, *J* = 7.8 Hz, 1H), 7.87 (t, *J* = 7.5 Hz, 1H), 7.81 (t, *J* = 7.5 Hz, 1H), 7.40 (d, *J* = 7.5 Hz, 5H), 7.33 (t, *J* = 7.5 Hz, 4H), 7.27 - 7.30 (m, 2H). <sup>13</sup>C NMR (151 MHz, Chloroform-*d*) δ 174.60, 162.17, 157.06, 137.46, 136.09, 134.48, 130.97, 130.26, 130.23, 128.87, 128.39, 127.71, 127.68, 60.34. HRMS (ESI-TOF) calcd for C<sub>22</sub>H<sub>15</sub>NO<sub>3</sub> [M + H]<sup>+</sup>: 342.1125; found: 342.1124.

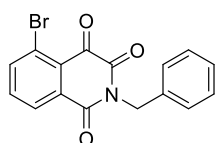

**2-benzyl-5-bromoisoquinoline-1,3,4(2H)-trione (4af).** Purification by flash column chromatography eluting with petroleum ether/ethyl acetate (5/1, v/v) gave **4af** (56mg, 54%) as a light yellow solid. mp 172 - 174 °C. <sup>1</sup>H NMR (600 MHz, Chloroform-*d*) δ 8.38 (dd, *J* = 7.8, 1.5 Hz, 1H), 8.03 (dd, *J* = 7.8, 1.2 Hz, 1H), 7.65 (t, *J* = 8.1 Hz, 1H), 7.48 (dd, *J* = 7.2, 1.8 Hz, 2H), 7.30 (t, *J* = 7.2 Hz, 2H), 7.27 (d, *J* = 7.2 Hz, 1H), 5.21 (s, 2H). <sup>13</sup>C NMR (151 MHz, Chloroform-*d*) δ 173.02, 161.15, 156.51, 141.13, 135.56, 135.30, 132.63, 129.82, 129.42, 128.78, 128.65, 128.15, 123.78, 44.59. HRMS (ESI-TOF) calcd for C<sub>16</sub>H<sub>10</sub>NO<sub>3</sub> [M + H]<sup>+</sup>: 343.9917; found: 343.9914.

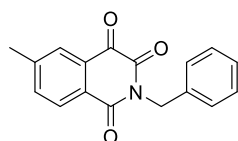

**2-benzyl-6-methylisoquinoline-1,3,4(2H)-trione (4ah)** <sup>[5]</sup>. Purification by flash column

chromatography eluting with petroleum ether/ethyl acetate (5/1, v/v) gave **4ah** (62mg, 74%) as a light yellow solid.  $^1\text{H}$  NMR (600 MHz, Chloroform-*d*)  $\delta$  8.20 (d,  $J$  = 7.8 Hz, 1H), 7.97 (d,  $J$  = 1.8 Hz, 1H), 7.66 (dd,  $J$  = 8.4, 1.8 Hz, 1H), 7.48 (d,  $J$  = 7.2 Hz, 2H), 7.29 (t,  $J$  = 6.9 Hz, 2H), 7.25 (d,  $J$  = 7.2 Hz, 1H), 5.20 (s, 2H), 2.51 (s, 3H).  $^{13}\text{C}$  NMR (151 MHz, Chloroform-*d*)  $\delta$  174.82, 162.19, 157.14, 145.90, 136.02, 130.70, 129.99, 129.39, 128.57, 127.96, 127.95, 127.42, 44.20, 21.65.

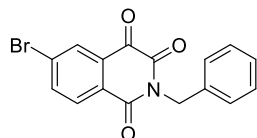

**2-benzyl-6-bromoisoquinoline-1,3,4(2H)-trione (4ai)** <sup>[5]</sup>. Purification by flash column chromatography eluting with petroleum ether/ethyl acetate (5/1, v/v) gave **4ai** (85mg, 82%) as a light yellow solid.  $^1\text{H}$  NMR (600 MHz, Chloroform-*d*)  $\delta$  8.31 (s, 1H), 8.20 (d,  $J$  = 8.4 Hz, 1H), 8.00 (d,  $J$  = 9.0 Hz, 1H), 7.48 (d,  $J$  = 7.2 Hz, 2H), 7.33 – 7.27 (m, 3H), 5.22 (s, 2H).  $^{13}\text{C}$  NMR (151 MHz, Chloroform-*d*)  $\delta$  173.68, 161.55, 156.41, 139.09, 135.65, 131.75, 131.45, 130.55, 130.02, 129.43, 128.65, 128.48, 128.14, 44.46.

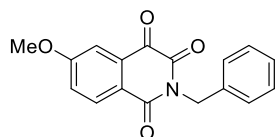

**2-benzyl-6-methoxyisoquinoline-1,3,4(2H)-trione (4aj)**. Purification by flash column chromatography eluting with petroleum ether/ethyl acetate (5/1, v/v) gave **4aj** (77mg, 87%) as a light yellow solid. mp 167 - 169 °C.  $^1\text{H}$  NMR (600 MHz, Chloroform-*d*)  $\delta$  8.23 (d,  $J$  = 9.0 Hz, 1H), 7.56 (d,  $J$  = 3.0 Hz, 1H), 7.47 (d,  $J$  = 7.8 Hz, 2H), 7.34 (dd,  $J$  = 9.0, 2.4 Hz, 1H), 7.29 (t,  $J$  = 7.5 Hz, 2H), 7.24 (t,  $J$  = 7.2 Hz, 1H), 5.19 (s, 2H), 3.95 (s, 3H).  $^{13}\text{C}$  NMR (151 MHz, Chloroform-*d*)  $\delta$  174.78, 164.39, 161.87, 157.16, 136.08, 132.58, 131.99, 129.38, 128.56, 127.94, 123.41, 122.74, 110.12, 56.19, 44.10. HRMS (ESI-TOF) calcd for  $\text{C}_{17}\text{H}_{13}\text{NO}_4$  [ $\text{M} + \text{H}$ ] $^+$ : 296.0917; found: 296.0916.

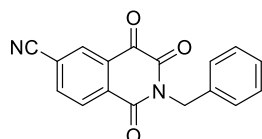

**2-benzyl-1,3,4-trioxo-1,2,3,4-tetrahydroisoquinoline-6-carbonitrile (4ak)**. Purification by flash column chromatography eluting with petroleum ether/ethyl acetate (5/1, v/v) gave **4ak** (53mg, 61%) as a light yellow solid. mp 212 - 214 °C.  $^1\text{H}$  NMR (600 MHz, Chloroform-*d*)  $\delta$  8.49 (d,  $J$  = 8.4 Hz, 1H), 8.46 (d,  $J$  = 1.8 Hz, 1H), 8.13 (dd,  $J$  = 8.1, 1.5 Hz, 1H), 7.50 (d,  $J$  = 6.6 Hz, 1H), 7.34 – 7.27 (m, 3H), 5.25 (s, 2H).  $^{13}\text{C}$  NMR (151 MHz, Chloroform-*d*)  $\delta$  173.04, 160.73, 155.93, 138.33, 135.27, 132.47, 131.38, 131.25, 130.85, 129.55, 128.74, 128.35, 118.59, 116.18, 44.78. HRMS (ESI-TOF) calcd for  $\text{C}_{17}\text{H}_{10}\text{N}_2\text{O}_3$  [ $\text{M} + \text{Na}$ ] $^+$ : 313.0584; found: 313.0584.

## 5.5 Scale-up synthesis of 3a

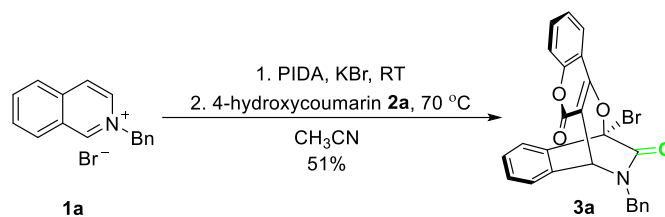

Under an argon atmosphere, a 50 mL Schlenk flask was charged with iminium salt **1a** (5 mmol), PIDA (15 mmol), KBr (5 mmol), H<sub>2</sub>O (180  $\mu$ L), and dry MeCN (20 mL). The mixture was continually stirred at room temperature until **1a** was consumed as indicated by TLC (ca. 12 h). 4-Hydroxycoumarin **2a** (10 mmol) was added. The reaction mixture was heated at 70  $^\circ$ C in the oil bath until the intermediate was consumed as indicated by TLC (ca. 8 h), then cooled to room temperature, diluted with water (20 mL), and extracted with ethyl acetate (3  $\times$  20 mL). The combined organic layer was washed with brine, dried over Na<sub>2</sub>SO<sub>4</sub>, filtered, and concentrated under reduced pressure. The crude product was purified by column chromatography on silica gel (petroleum ether/ethyl acetate as the eluent) to give the desired product **3a** (1210 mg, 51%).

### 5.6 Scale-up synthesis of 4a

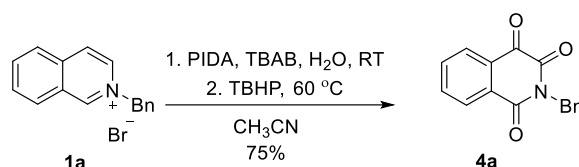

To the mixture of *N*-alkyl iminium salt **1a** (5 mmol), PIDA (15 mmol), TBAB (5 mmol) was added dry MeCN (15 mL) and H<sub>2</sub>O (90  $\mu$ L) in a 50 mL reaction flask. The mixture was continually stirred at room temperature until **1a** was consumed as indicated by TLC (ca. 10 h). TBHP (10 mmol, in decane) was added. The reaction mixture was heated at 60  $^\circ$ C in the oil bath until the intermediate was consumed as indicated by TLC (ca. 60 h), then cooled to room temperature, diluted with water (20 mL), and extracted with ethyl acetate (3  $\times$  20 mL). The combined organic layer was washed with brine, dried over Na<sub>2</sub>SO<sub>4</sub>, filtered, and concentrated under reduced pressure. The crude product was purified by column chromatography on silica gel (petroleum ether/ethyl acetate as the eluent) to give the desired product **4a** (995 mg, 75%).

### 5.7 Synthesis of 5 via debrominative reduction of 3a

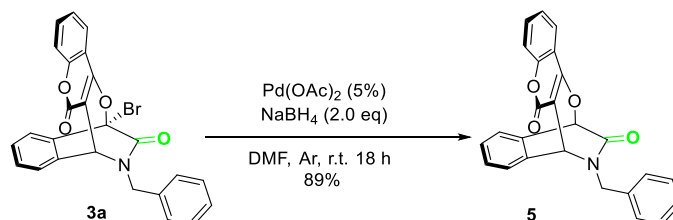

Under an argon atmosphere, a 10 mL Schlenk flask was charged with 1,4-bridged dihydroisoquinoline-3-ones **3a** (0.2 mmol), NaBH<sub>4</sub> (0.4 mmol), Pd(OAc)<sub>2</sub> (0.01 mmol) and anhydrous DMF (2 mL). The mixture was continually stirred at room temperature until **3a** was consumed as indicated by TLC (ca. 18 h). The reaction mixture was quenched by water, and extracted with ethyl acetate (3  $\times$  5 mL). The combined organic layer was washed with brine, dried

over Na<sub>2</sub>SO<sub>4</sub>, filtered, and concentrated under reduced pressure. The crude product was purified by column chromatography on silica gel (petroleum ether/ethyl acetate=6:1) to give the desired product **5** (70 mg, 89%) as a white solid, m. p. 150–152 °C.

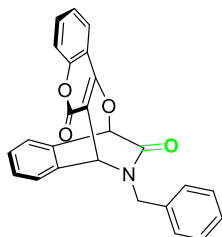

**15-benzyl-7,12-dihydro-6H-7,12-(epiminomethano)benzo[5,6]oxepino[3,2-c]chromene-6,14-dione (5).** <sup>1</sup>H NMR (600 MHz, Chloroform-*d*) δ 7.76 (dd, *J* = 8.1, 1.5 Hz, 1H), 7.54 (dd, *J* = 7.5, 1.5 Hz, 1H), 7.49 (td, *J* = 7.8, 2.0 Hz, 1H), 7.39 (td, *J* = 7.8, 1.4 Hz, 1H), 7.35 (td, *J* = 7.5, 1.6 Hz, 1H), 7.25 – 7.20 (m, 8H), 5.77 (s, 1H), 5.47 (s, 1H), 5.00 (d, *J* = 15.0 Hz, 1H), 4.54 (d, *J* = 15.0 Hz, 1H). <sup>13</sup>C NMR (151 MHz, Chloroform-*d*) δ 166.38, 161.11, 159.28, 152.75, 142.10, 135.47, 132.53, 130.72, 129.86, 128.83, 128.78, 128.73, 128.30, 127.94, 124.14, 122.93, 122.54, 116.63, 115.90, 106.55, 80.61, 53.40, 48.88. HRMS (ESI-TOF) calcd for C<sub>25</sub>H<sub>17</sub>NO<sub>4</sub> [M + Na]<sup>+</sup>: 418.1050; found: 418.1051.

### 5.8 Synthesis of **6** via rearrangement/reduction of **4a**

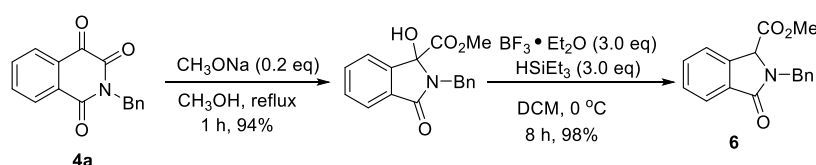

**Base-promoted rearrangement of 4a.** A 5 mL reaction flask was charged with sodium methoxide (0.04 mmol), CH<sub>3</sub>OH (2 mL), and isoquinoline-1,3,4-triones **4a** (0.2 mmol). The mixture was refluxed at 70 °C in the oil bath until **4a** was consumed as indicated by TLC (ca. 1 h), then cooled to room temperature. Most of the solvent was removed under reduced pressure. The residue was diluted with ethyl acetate (5 mL) and water (5 mL), and extracted with EtOAc (3 × 15 mL). The combined organic layer was washed with brine, dried over Na<sub>2</sub>SO<sub>4</sub>, filtered, and concentrated under reduced pressure. The crude product was purified by column chromatography on silica gel (petroleum ether/ethyl acetate=3:1) to provide methyl 2-benzyl-1-hydroxy-3-oxoisindoline-1-carboxylate as a white solid (56 mg, 94% yield).

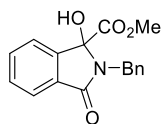

**methyl 2-benzyl-1-hydroxy-3-oxoisindoline-1-carboxylate** <sup>[10]</sup>. <sup>1</sup>H NMR (600 MHz, Chloroform-*d*) δ 7.89 (dt, *J* = 5.2, 2.9 Hz, 1H), 7.58 (td, *J* = 4.2, 1.8 Hz, 2H), 7.43 – 7.37 (m, 3H), 7.31 (t, *J* = 6.6 Hz, 2H), 7.26 (t, *J* = 7.5 Hz, 1H), 5.07 (d, *J* = 15.4 Hz, 1H), 4.94 – 4.86 (m, 1H), 4.35 (d, *J* = 15.2 Hz, 1H), 3.14 (d, *J* = 1.9 Hz, 3H). <sup>13</sup>C NMR (151 MHz, Chloroform-*d*) δ 171.55, 167.83, 143.57, 136.33, 132.56, 131.53, 130.35, 129.14, 128.35, 127.60, 123.86, 121.60, 86.89, 53.50, 42.32.

**Reduction of methyl 2-benzyl-1-hydroxy-3-oxoisindoline-1-carboxylate.** To the solution of 2-benzyl-1-hydroxy-3-oxoisindoline-1-carboxylate (0.2 mmol) and HSiEt<sub>3</sub> (0.6 mmol) in DCM was added BF<sub>3</sub>·Et<sub>2</sub>O (0.6 mmol) dropwise at 0 °C. The mixture was continually stirred at 0 °C until the carboxylate was consumed as indicated by TLC (ca. 8 h). It was quenched with saturated NH<sub>4</sub>Cl

solution (5 mL), and extracted with CH<sub>2</sub>Cl<sub>2</sub> (3 × 5 mL). The combined organic layer was washed with brine, dried over Na<sub>2</sub>SO<sub>4</sub>, filtered, and concentrated under reduced pressure. The crude product was purified by column chromatography on silica gel (petroleum ether/ethyl acetate as the eluent) to give the desired product **6** (55 mg, 98%) as colorless oil.

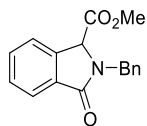

**methyl 2-benzyl-3-oxoisindoline-1-carboxylate (6)** <sup>[11]</sup>. <sup>1</sup>H NMR (600 MHz, Chloroform-*d*) δ 7.82 (dd, *J* = 7.0, 1.3 Hz, 1H), 7.47 – 7.43 (m, 3H), 7.26 – 7.22 (m, 2H), 7.20 (d, *J* = 6.5 Hz, 1H), 7.17 (d, *J* = 8.8 Hz, 2H), 5.38 (d, *J* = 15.0 Hz, 1H), 4.86 (s, 1H), 4.22 (d, *J* = 15.0 Hz, 1H), 3.67 (s, 3H). <sup>13</sup>C NMR (151 MHz, Chloroform-*d*) δ 168.61, 168.52, 139.34, 136.23, 132.06, 131.61, 129.36, 128.88, 128.53, 127.91, 124.21, 122.86, 61.40, 52.89, 45.32.

## 6 Reference

- (1) M. Mondal and A. Saha. One-pot two-step dithiocarbamylation of styrenes: metal-free stereoselective synthesis of styrenyl dithiocarbamates. *Org. Biomol. Chem.*, 2022, **20**, 3491.
- (2) L.-G. Bai, Y. Zhou, X. Zhuang, L. Zhang, J. Xue, X.-L. Lin, T. Cai and Q.-L. Luo. Base-promoted aerobic oxidation of *N*-alkyl iminium salts derived from isoquinolines and related heterocycles. *GreenChem.*, 2020, **22**, 197.
- (3) Z. Huang, O. Matsubara, S. Jia, E. Tokunaga, N. Shibata. Difluoromethylthiolation of phenols and related compounds with a HF<sub>2</sub>CSO<sub>2</sub>Na/Ph<sub>2</sub>PCl/Me<sub>3</sub>SiCl system. *Org Lett.*, 2017, **19**, 934.
- (4) A. Chevalier, P. Y. Renard, A. Romieu. Straightforward access to water-soluble unsymmetrical sulfoxanthene dyes: application to the preparation of Far-Red Fluorescent dyes with Large Stokes' Shifts. *Chem. Eur. J.*, 2014, **20**, 8330.
- (5) D. Zhu, W.-K. Luo, L. Yang, D.-Y. Ma. Iodine-catalyzed oxidative multiple C–H bond functionalization of isoquinolines with methylarenes: an efficient synthesis of isoquinoline-1,3,4(2H)-triones. *Org. Biomol. Chem.*, 2017, **15**, 7112.
- (6) A. Srivastava, A. Yadav, S. Samanta. Biopolymeric alginic acid: an efficient recyclable green catalyst for the Friedel–Crafts reaction of indoles with isoquinoline-1,3,4-triones in water. *Tetrahedron Lett.*, 2015, **56**, 6003.
- (7) S. Yoshifuji, Y. Arakawa. Ruthenium tetroxide oxidation of 3,4-dihydroisoquinolin-1(2H)-ones: an efficient synthesis of isoquinoline-1,3,4(2H)-triones. *Chem. Pharm. Bull.*, 1989, **37**, 3380.



- (8) D. M. Antonia, T. Consiglia, M. Antonio. Metal-Free air oxidation in a convenient cascade approach for the access to isoquinoline-1,3,4(2H)-triones. *Molecules.*, 2019, 24, 2177 .
- (9) G. Mitchell, E. D. Clarke, S. M. Ridley, D. T. Greenhow, K. J. Gillen, S. K. Vohra, P. Wardman. 1,3,4(2H)-isoquinolinetriene herbicides: Novel redox mediators of photosystem I. *Pestic. Sci.*, 1995, 44, 49.
- (10) K.-Q. Ling, G. Ji, H. Cai, J.-H. Xu. Dye-sensitized photooxygenations of 1,3-isoquinolinediones. *Tetrahedron Lett.*, 1998, 39, 2381.
- (11) C. Giorgio, C. Riccardo, G. Giuseppe, S. Paolo. Researches on isoindoles.VIII. synthesis and reactivity of 1- carbomethoxyisoindoles. *Gazz. Chim. Ital.*, 1976, 106, 65.

## 7. NMR spectra of compounds 2 – 6

### $^1\text{H}$ NMR and $^{13}\text{C}$ NMR spectra of compound 3a

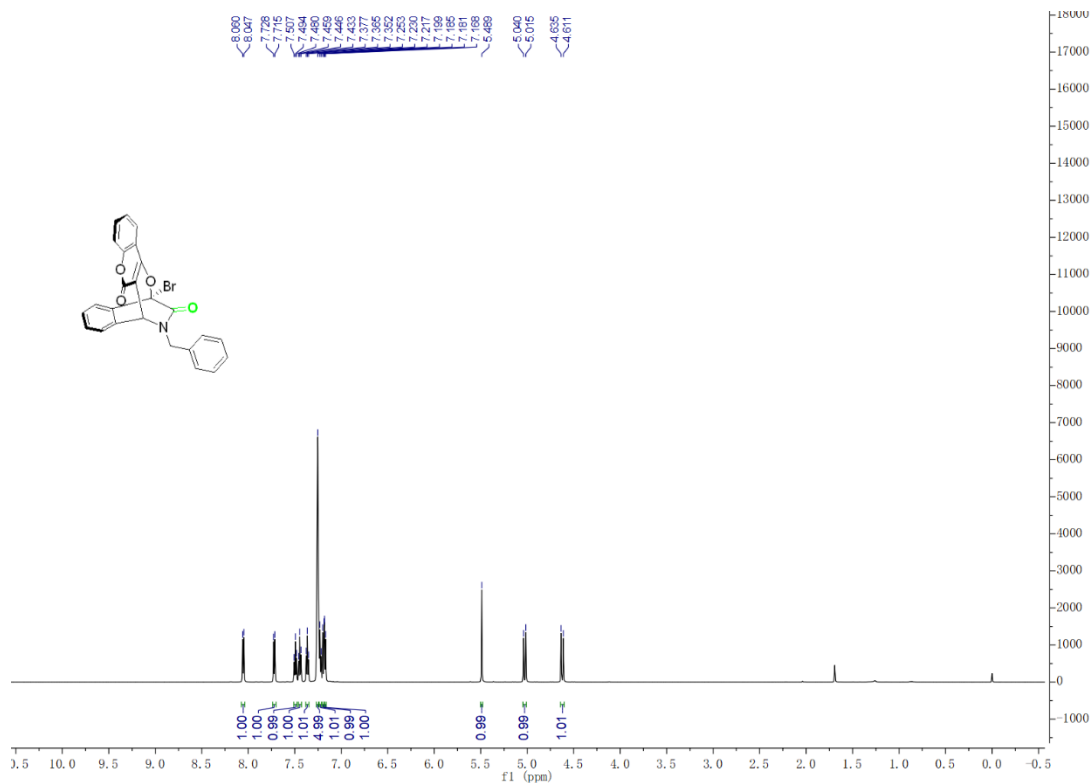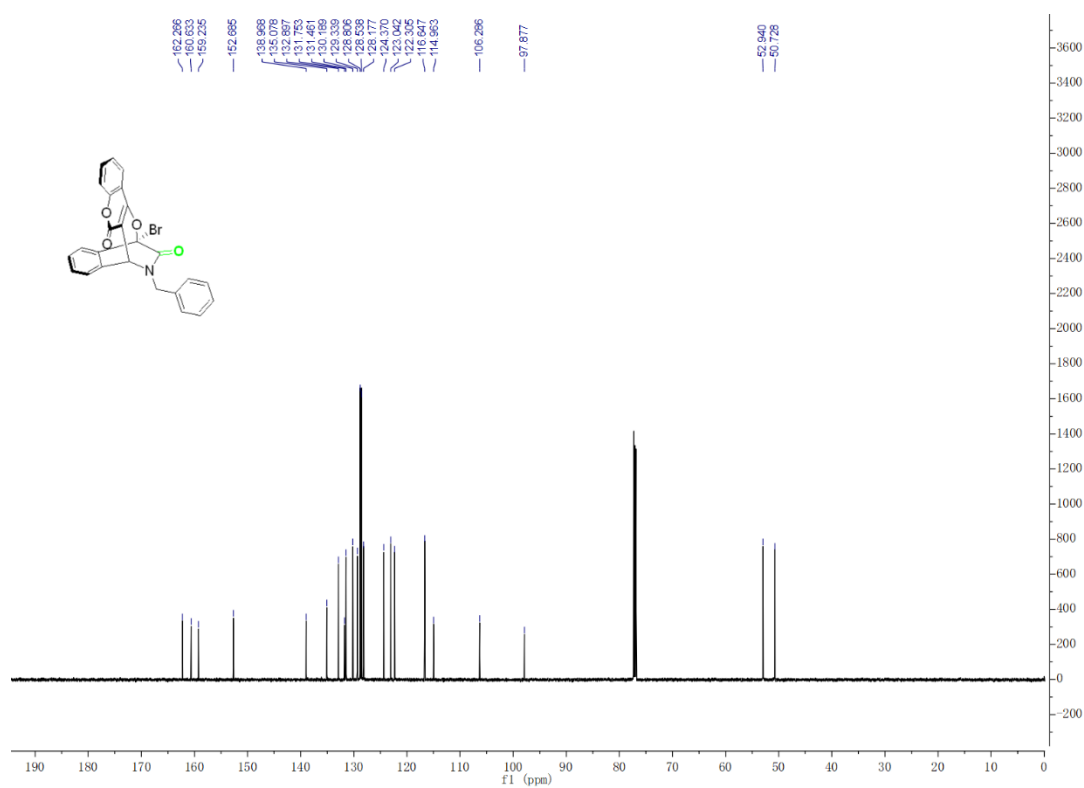

<sup>1</sup>H NMR and <sup>13</sup>C NMR spectra of compound **3b**

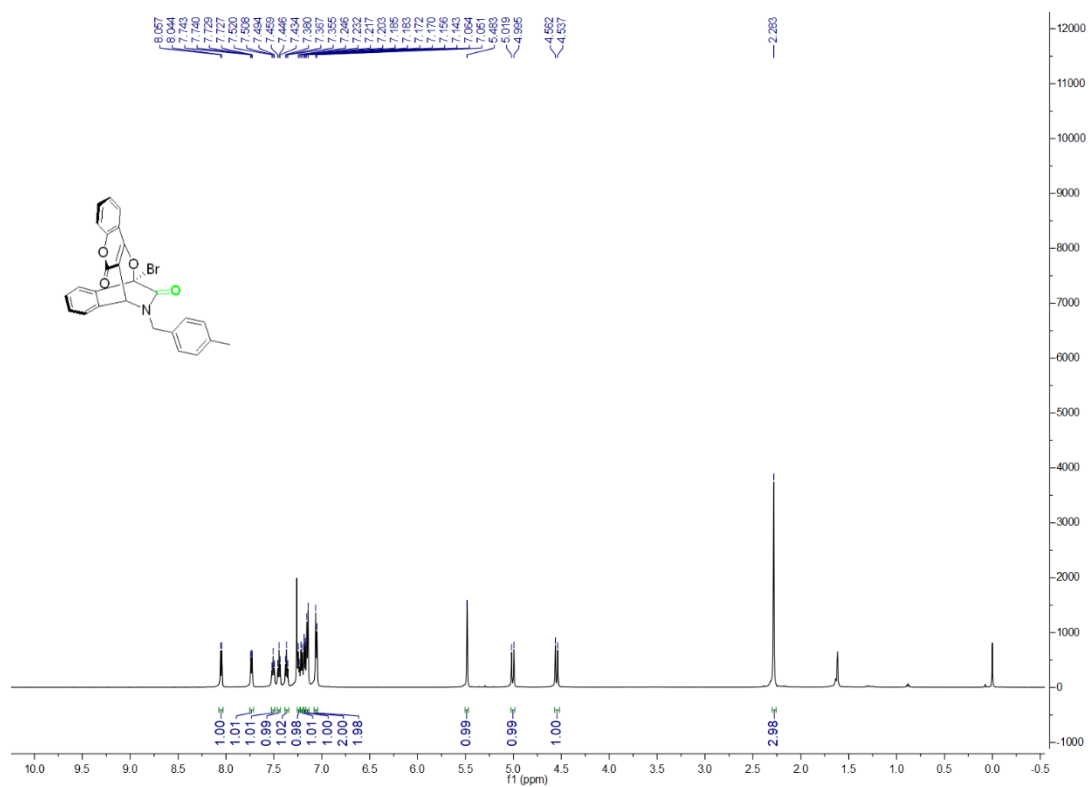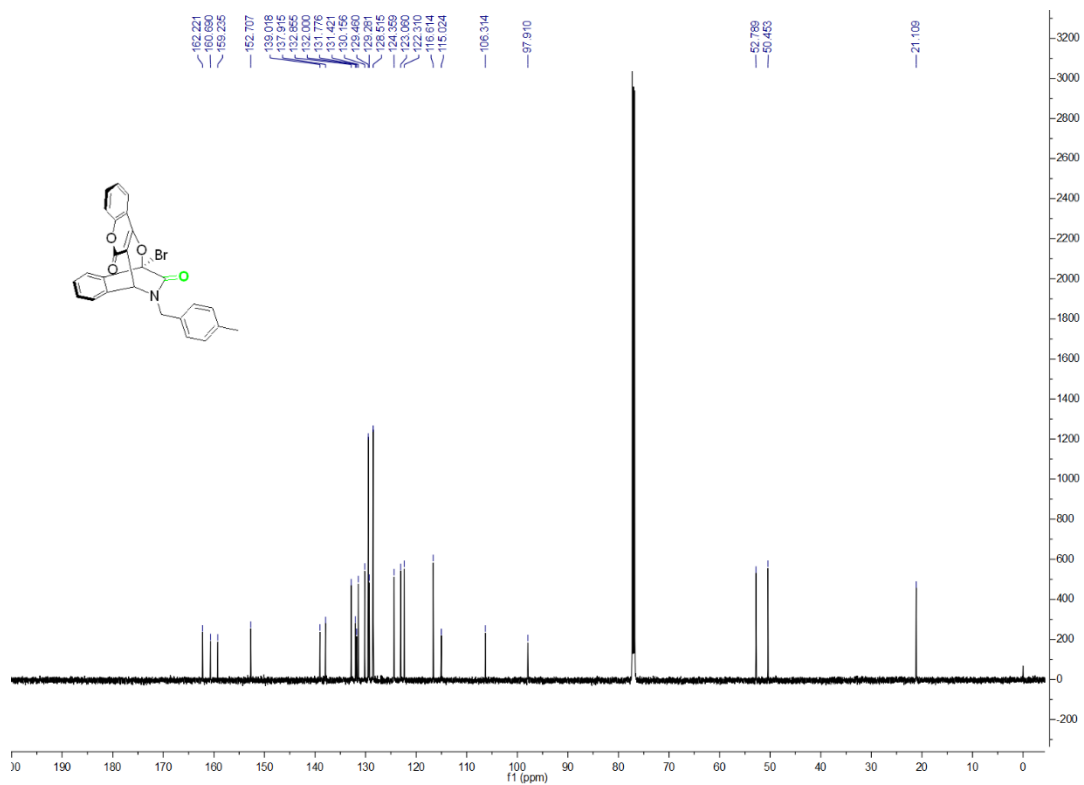



<sup>1</sup>H NMR and <sup>13</sup>C NMR spectra of compound **3d**

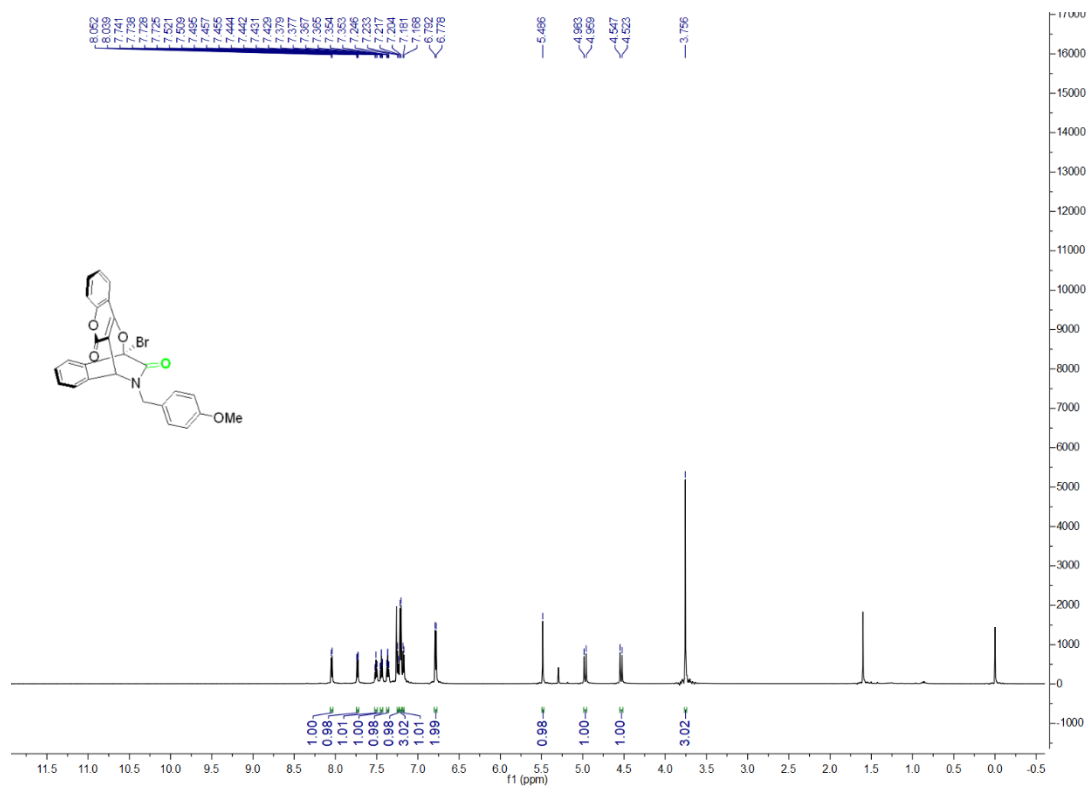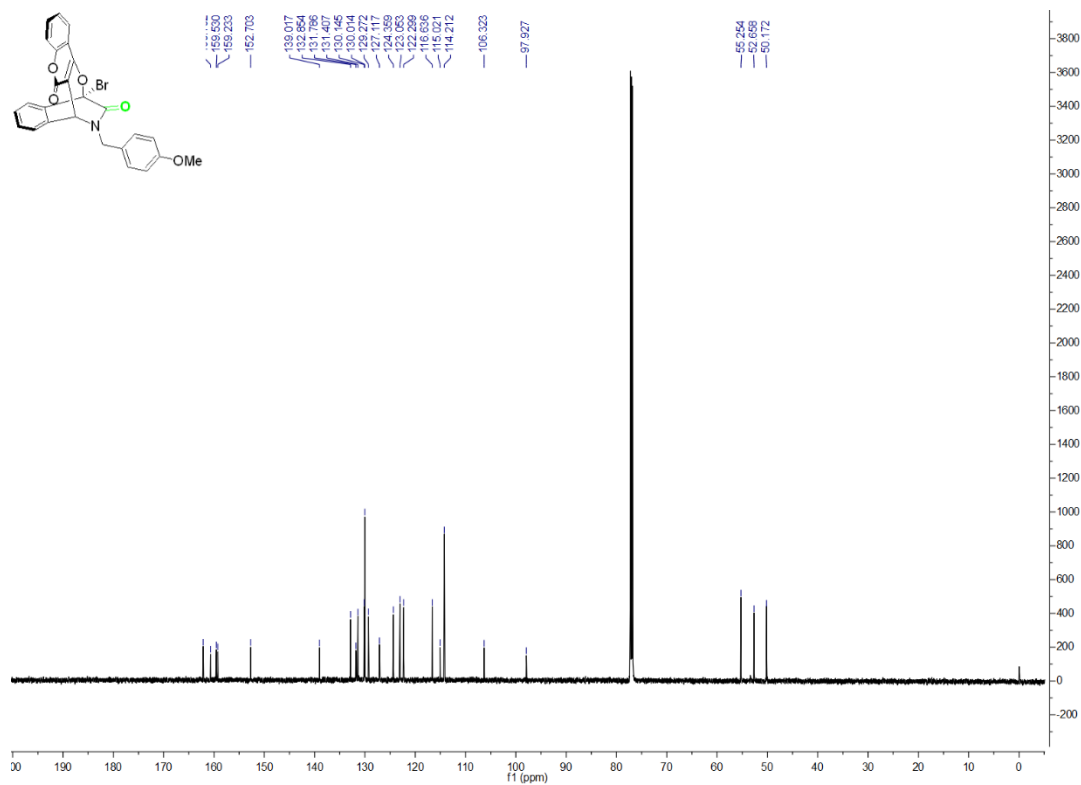

<sup>1</sup>H NMR and <sup>13</sup>C NMR spectra of compound 3e

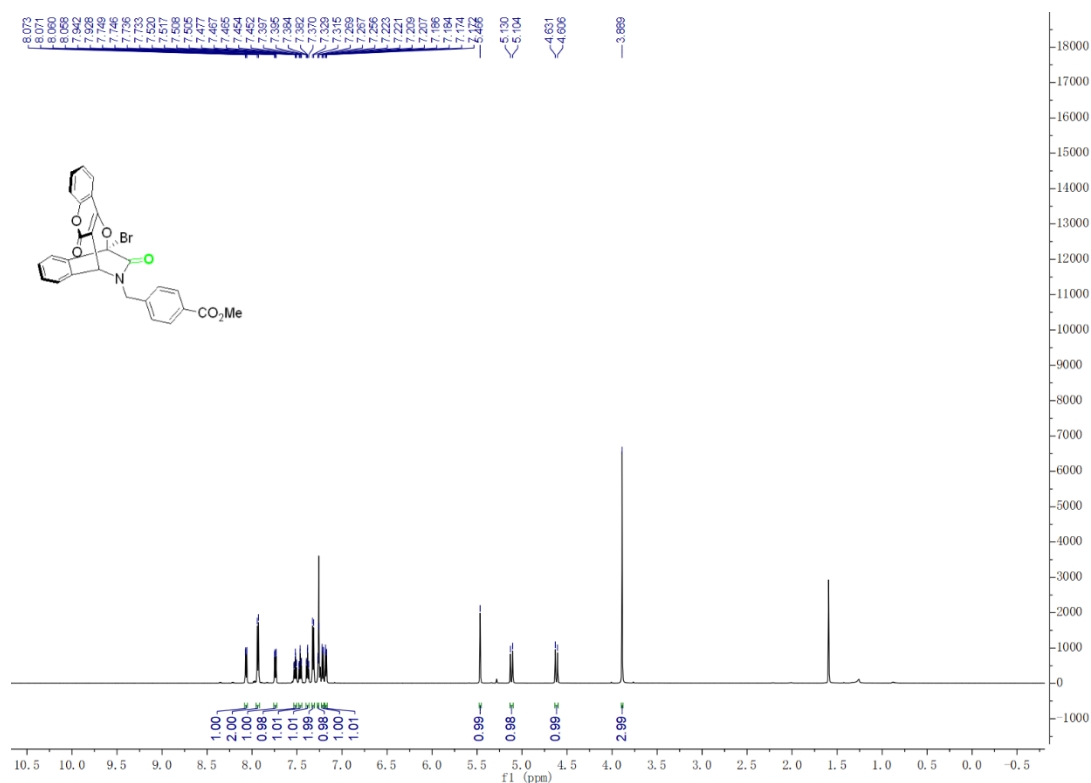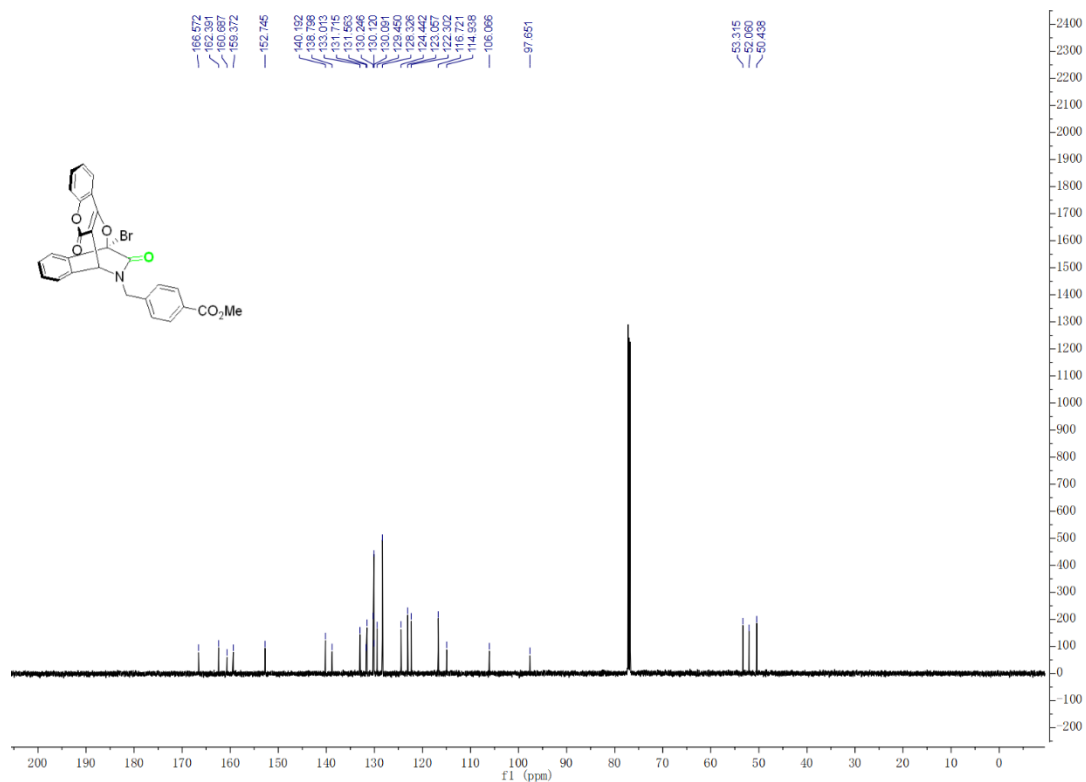

# <sup>1</sup>H NMR and <sup>13</sup>C NMR spectra of compound **3f**

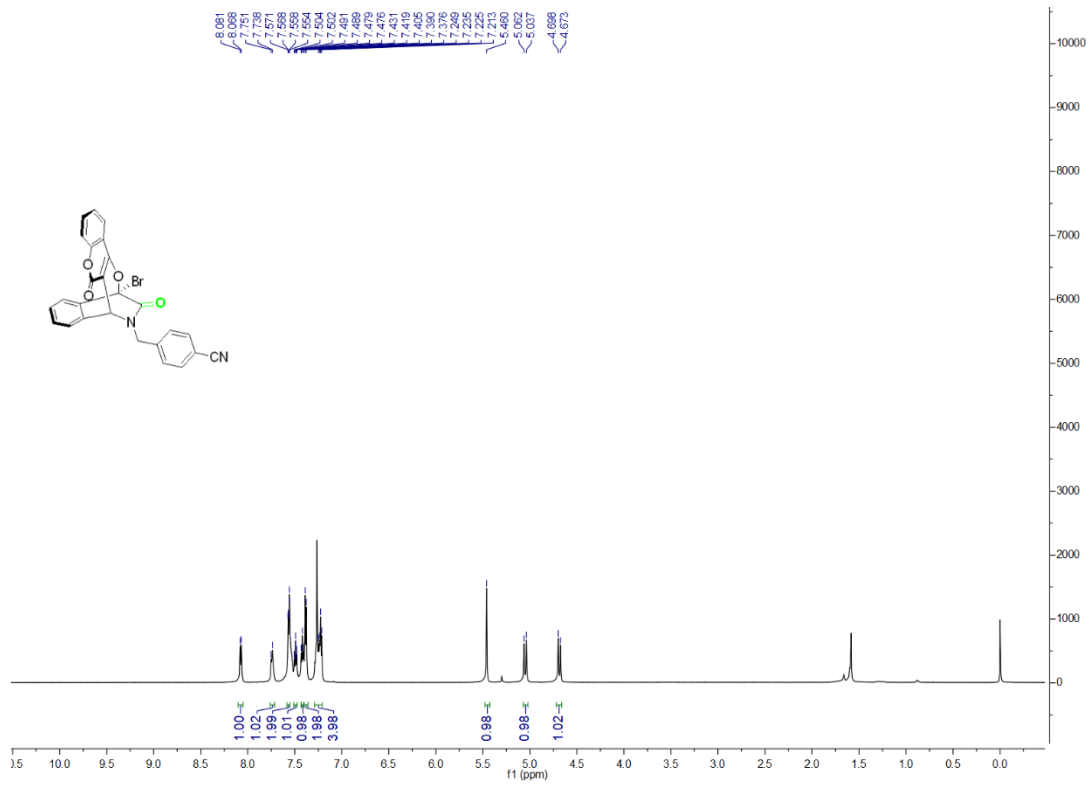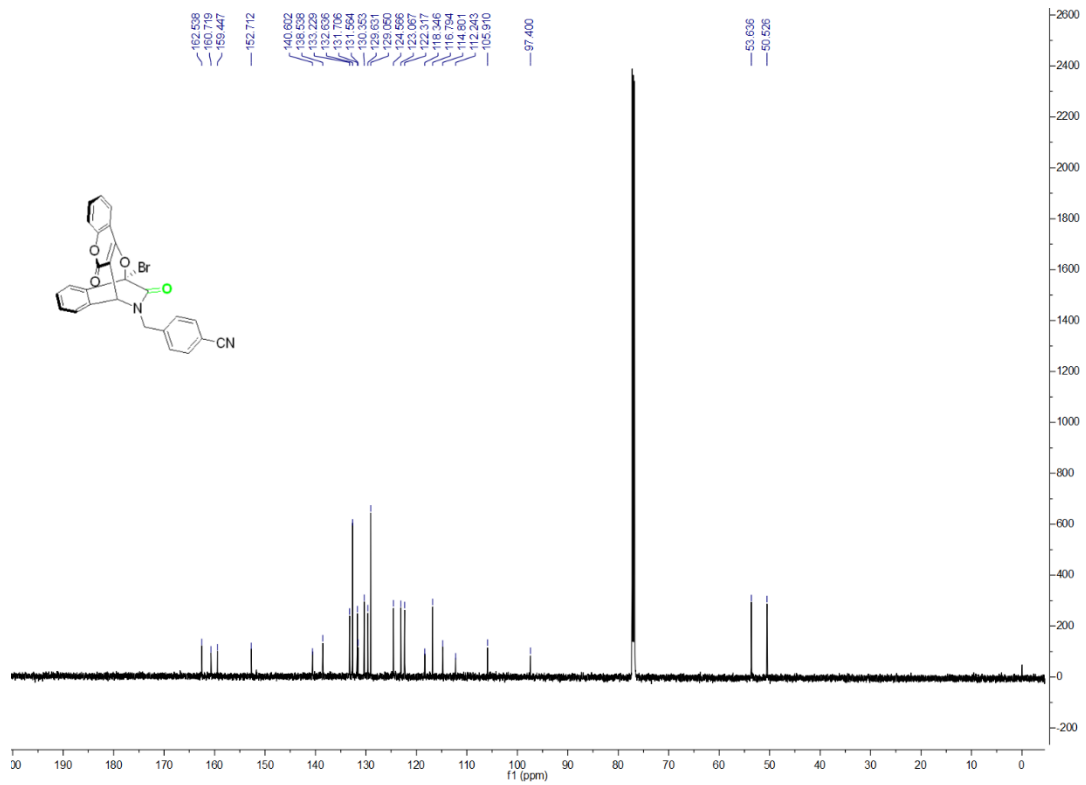

# <sup>1</sup>H NMR and <sup>13</sup>C NMR spectra of compound 3g

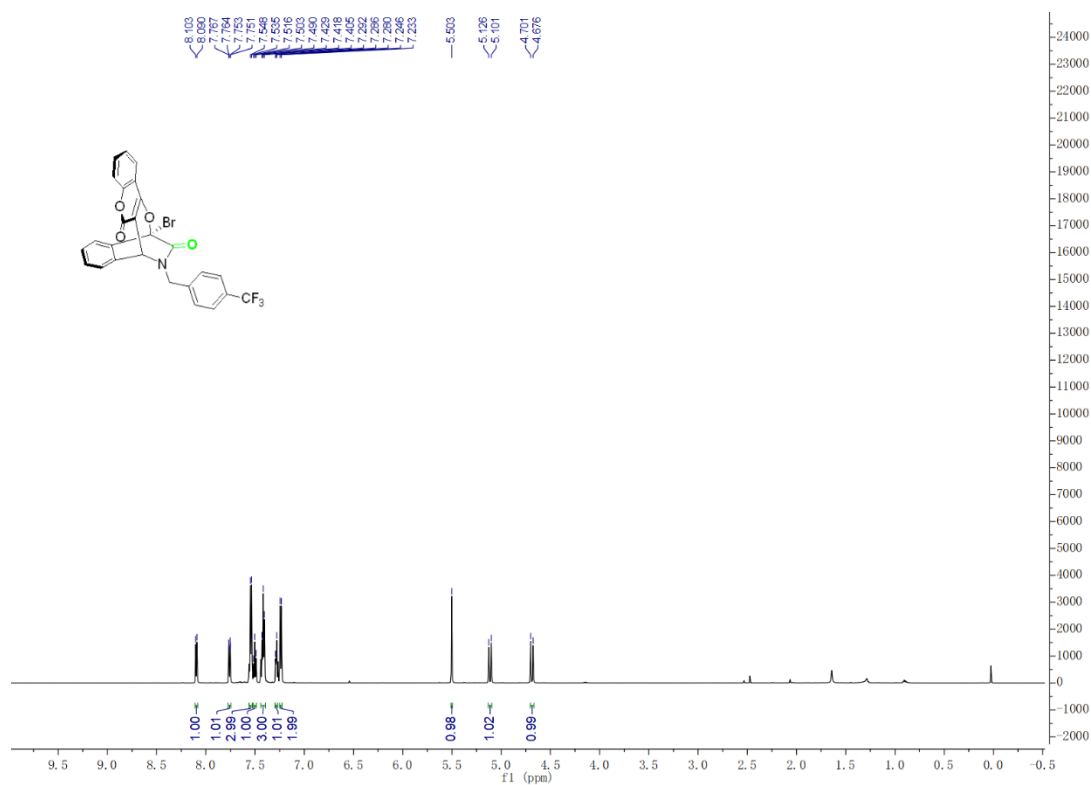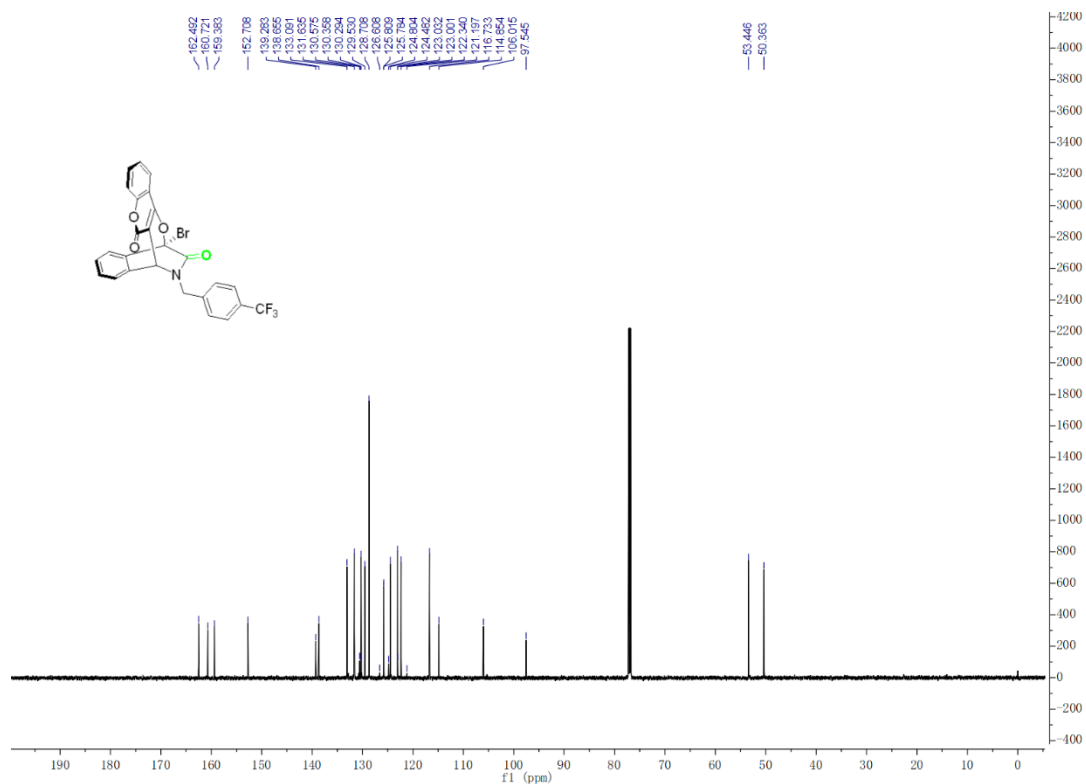



# <sup>1</sup>H NMR and <sup>13</sup>C NMR spectra of compound 3h

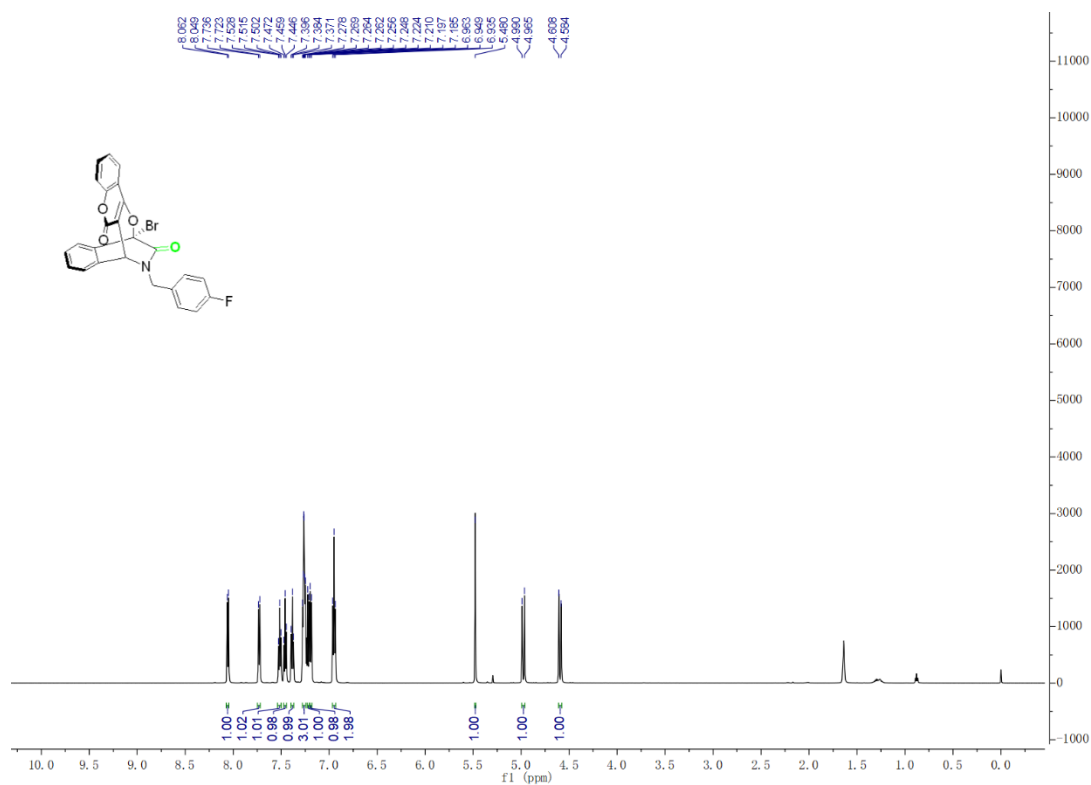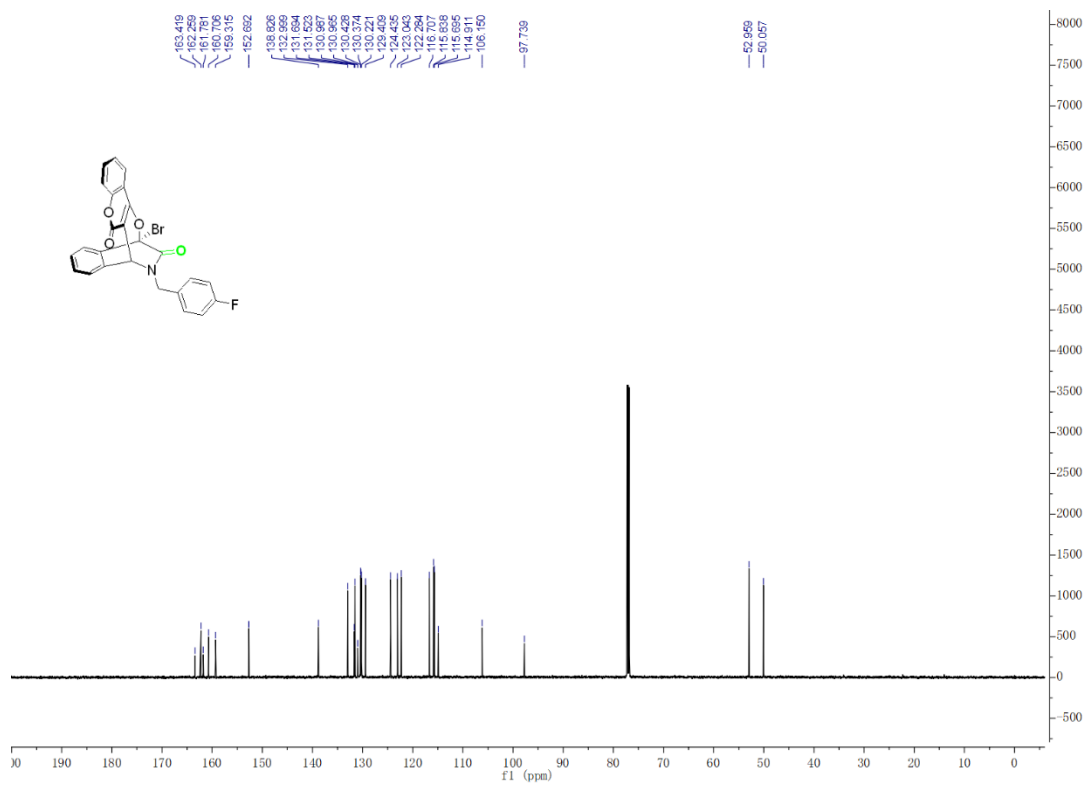

# <sup>1</sup>H NMR and <sup>13</sup>C NMR spectra of compound 3i

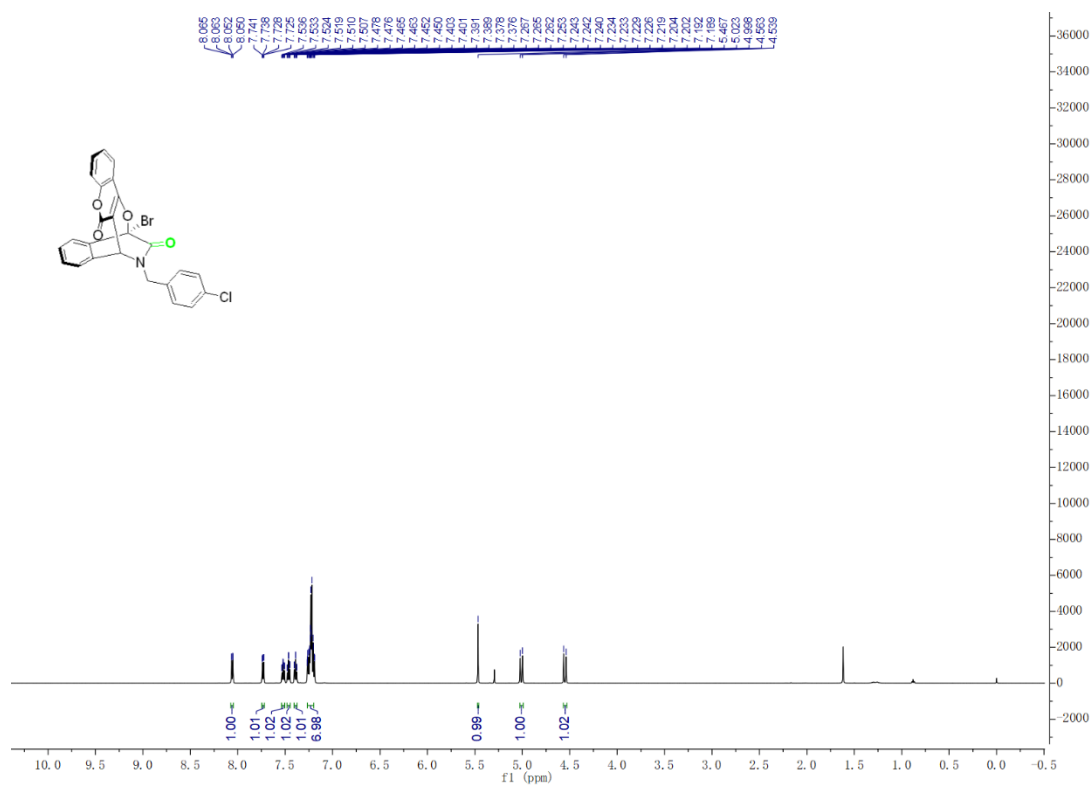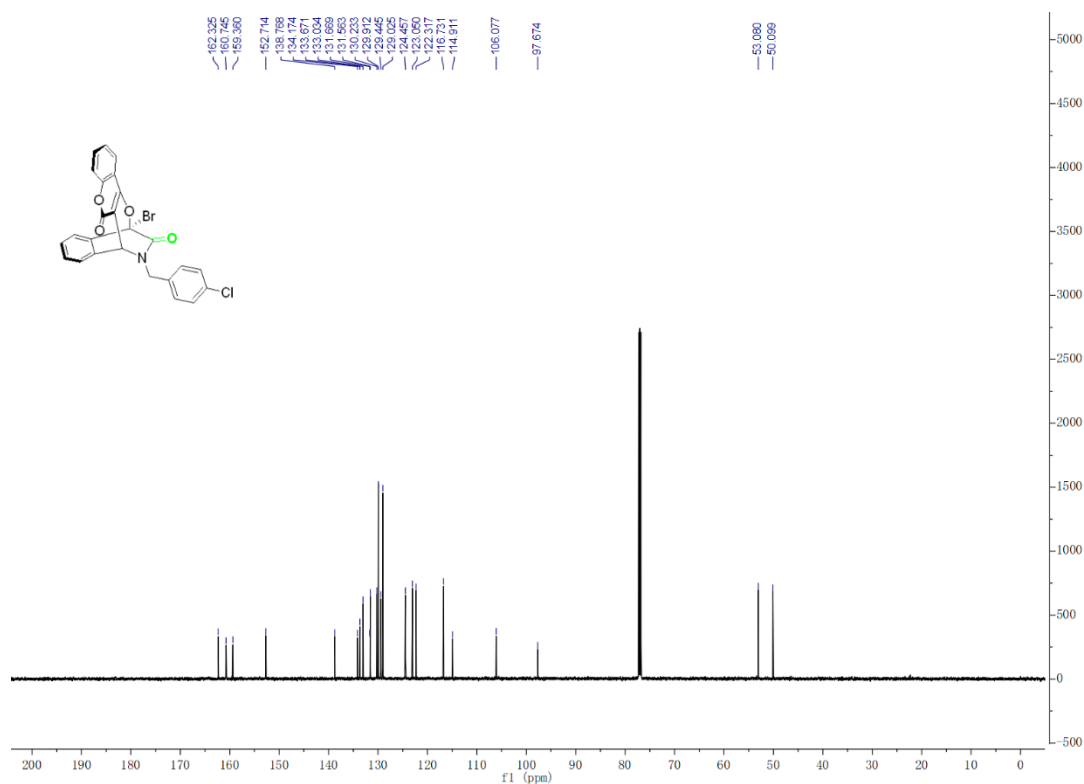

# <sup>1</sup>H NMR and <sup>13</sup>C NMR spectra of compound **3j**

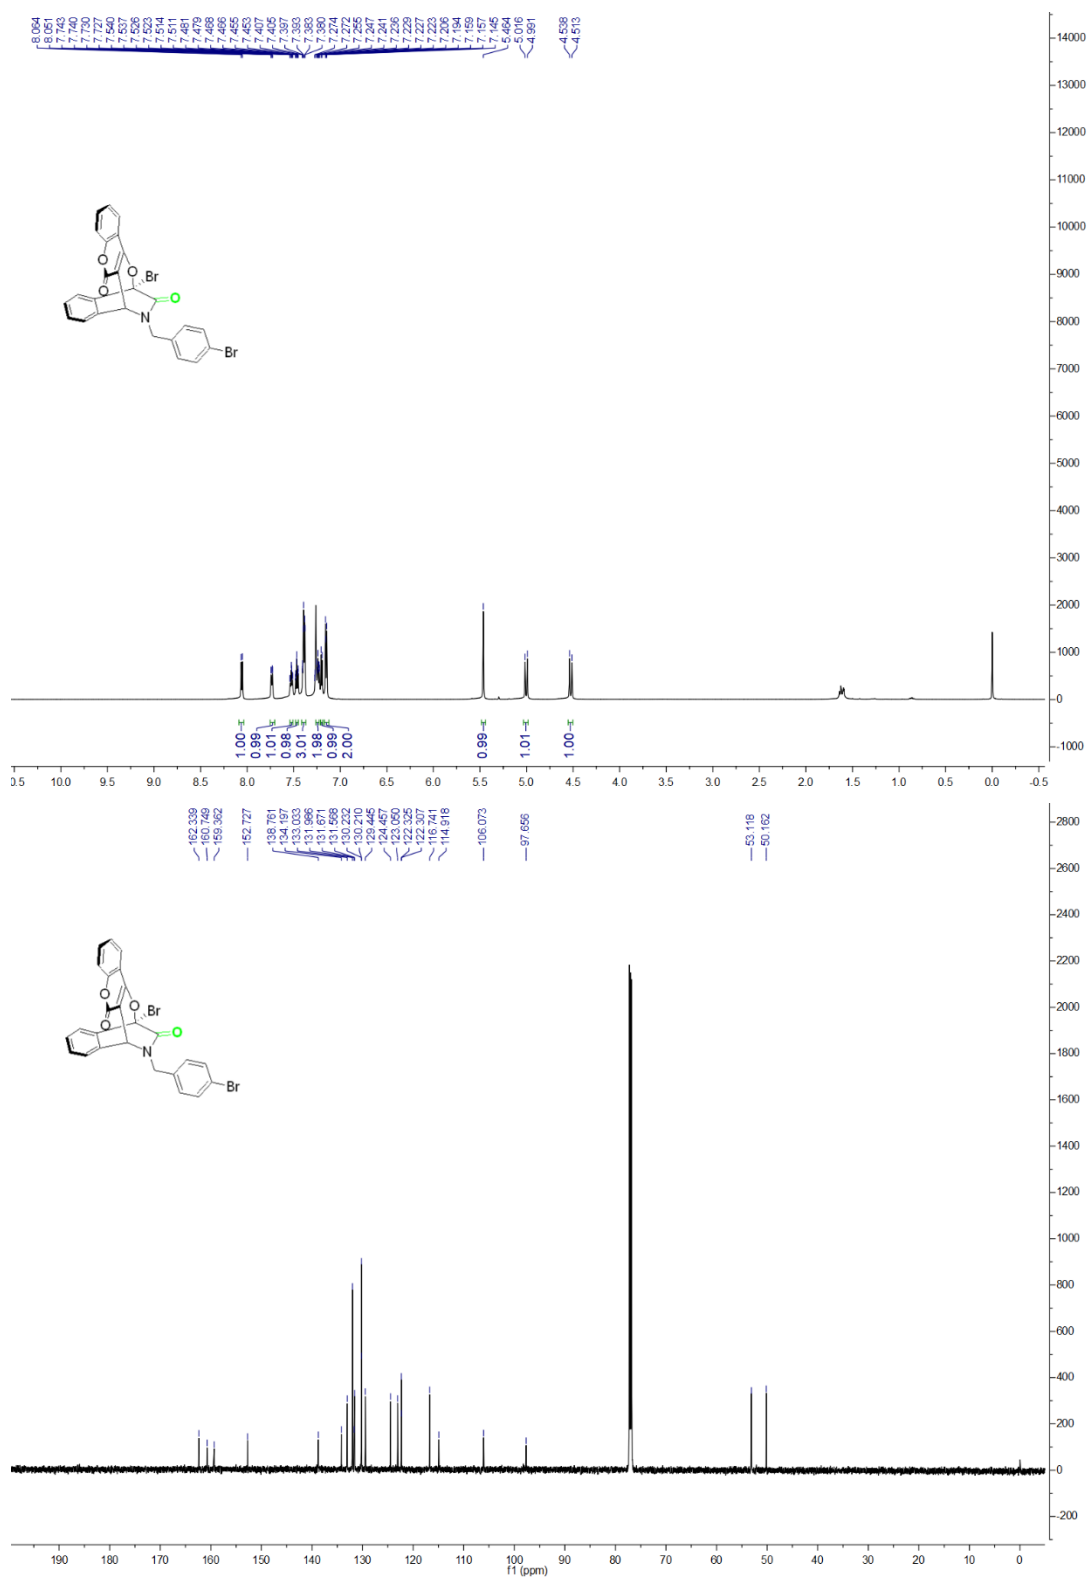

# <sup>1</sup>H NMR and <sup>13</sup>C NMR spectra of compound 3k

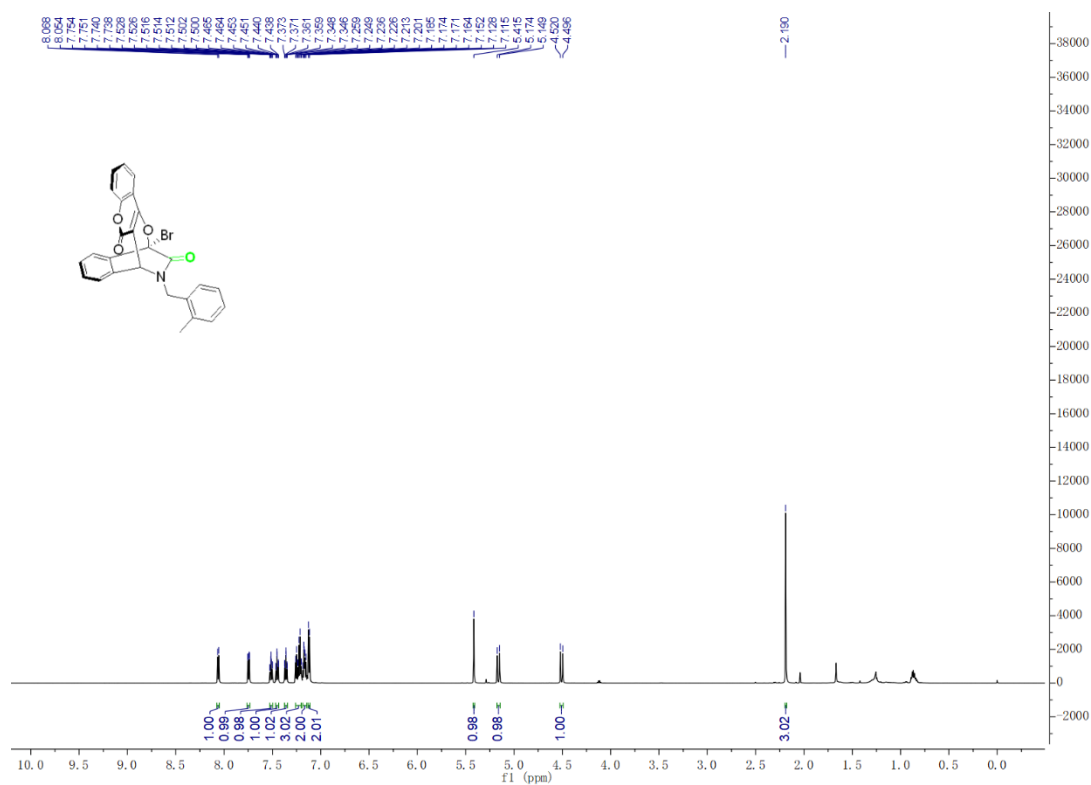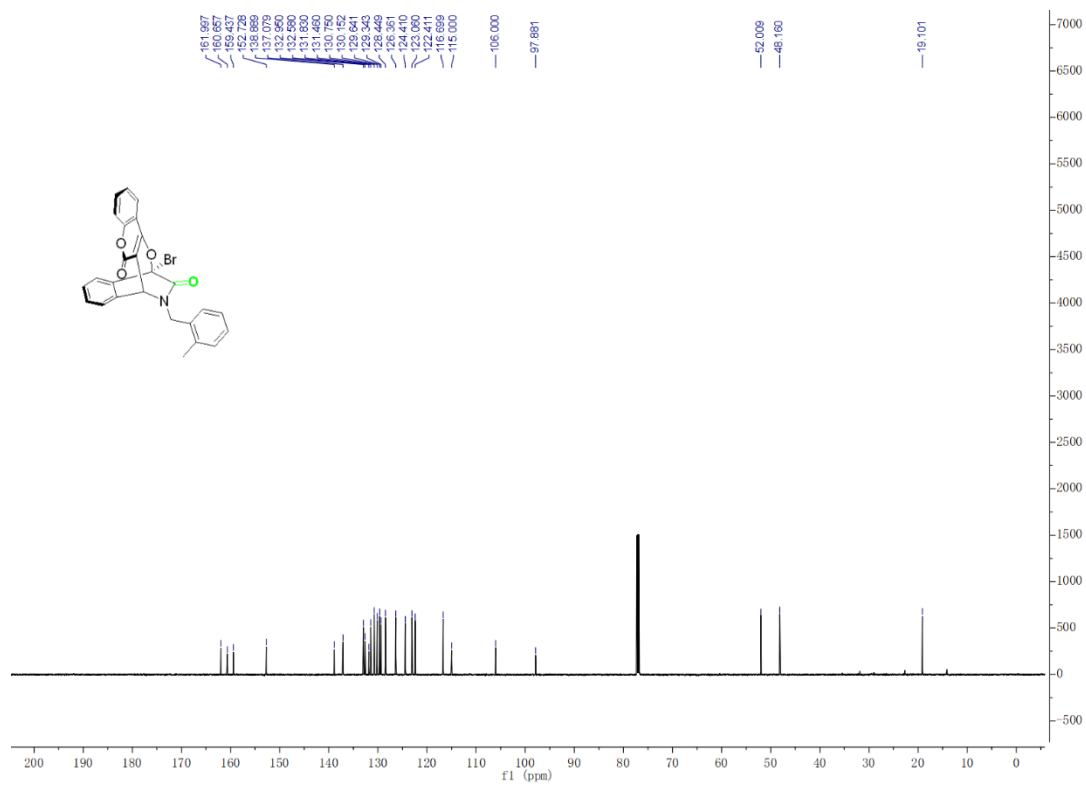

# <sup>1</sup>H NMR and <sup>13</sup>C NMR spectra of compound 3I

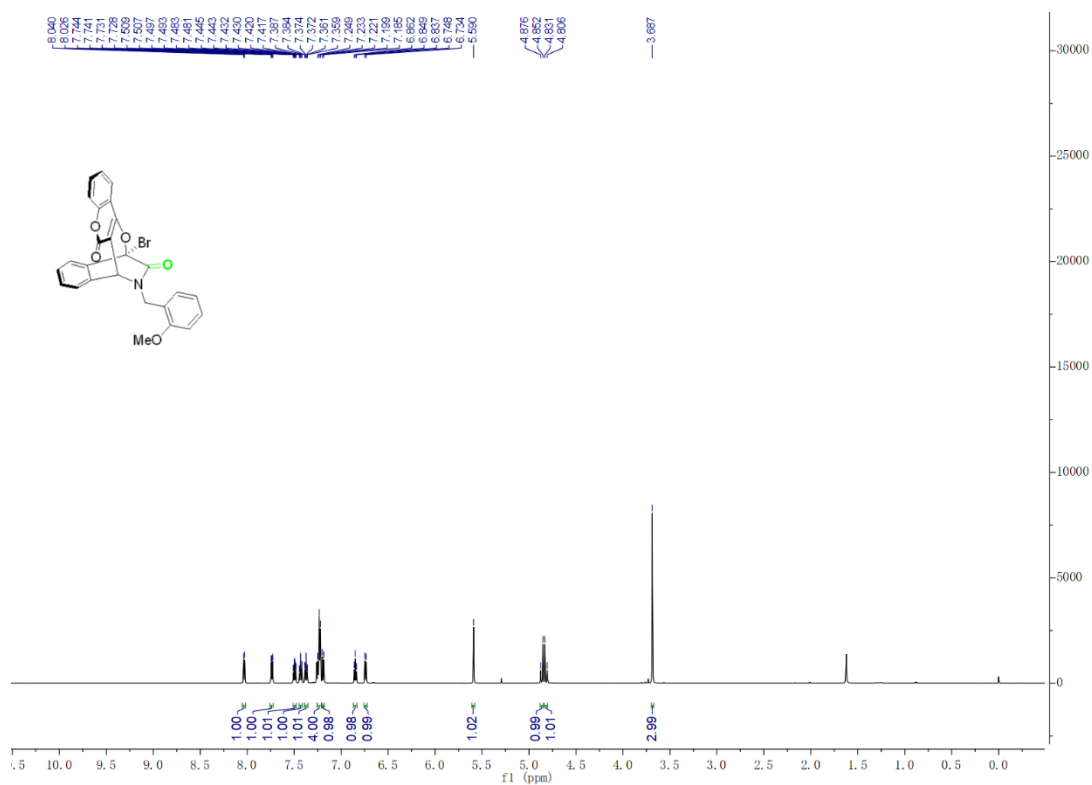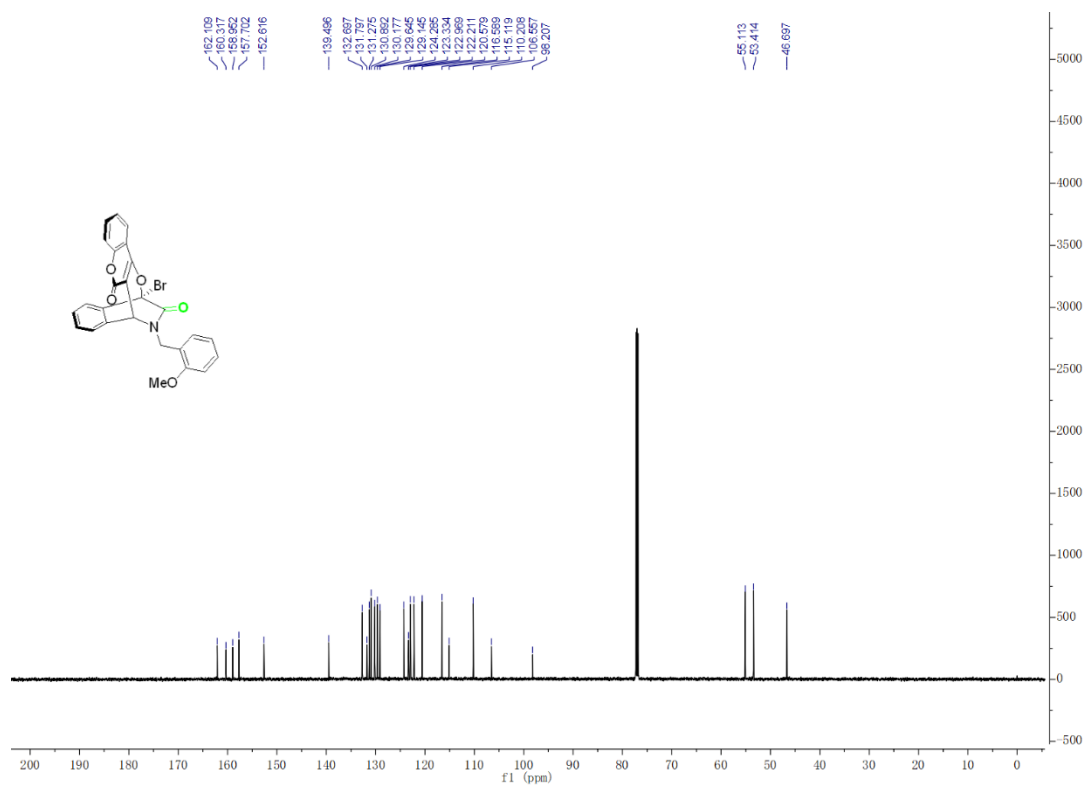

# <sup>1</sup>H NMR and <sup>13</sup>C NMR spectra of compound 3m

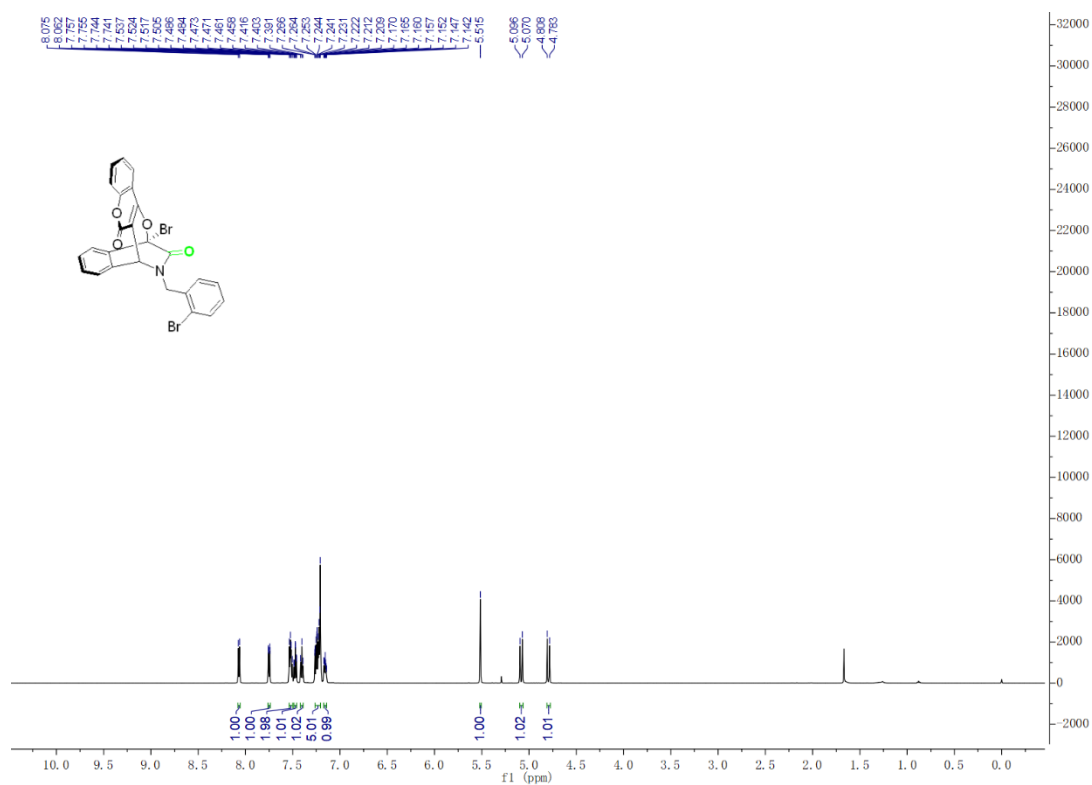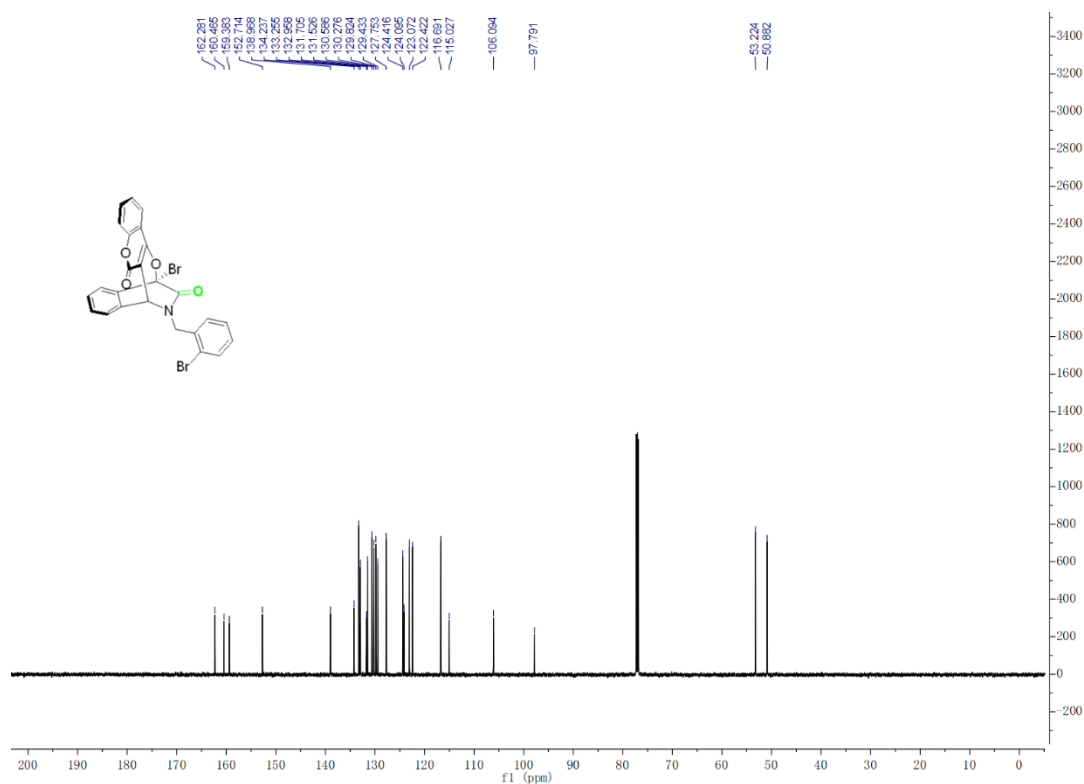

<sup>1</sup>H NMR and <sup>13</sup>C NMR spectra of compound 3n

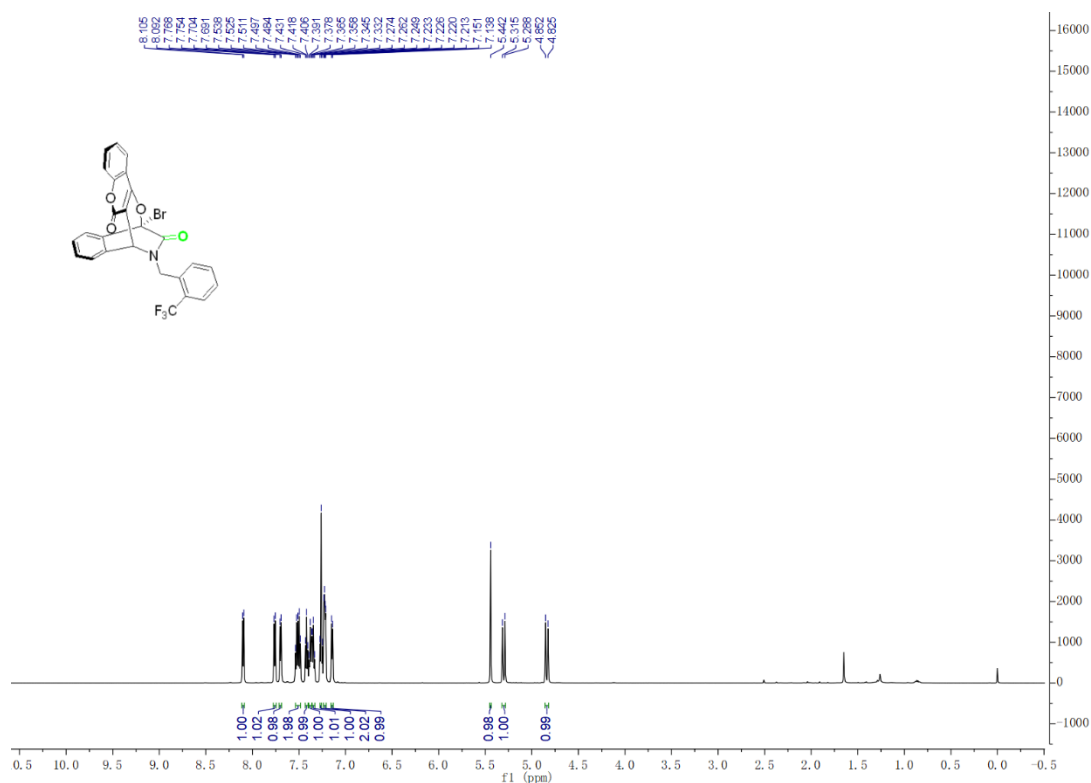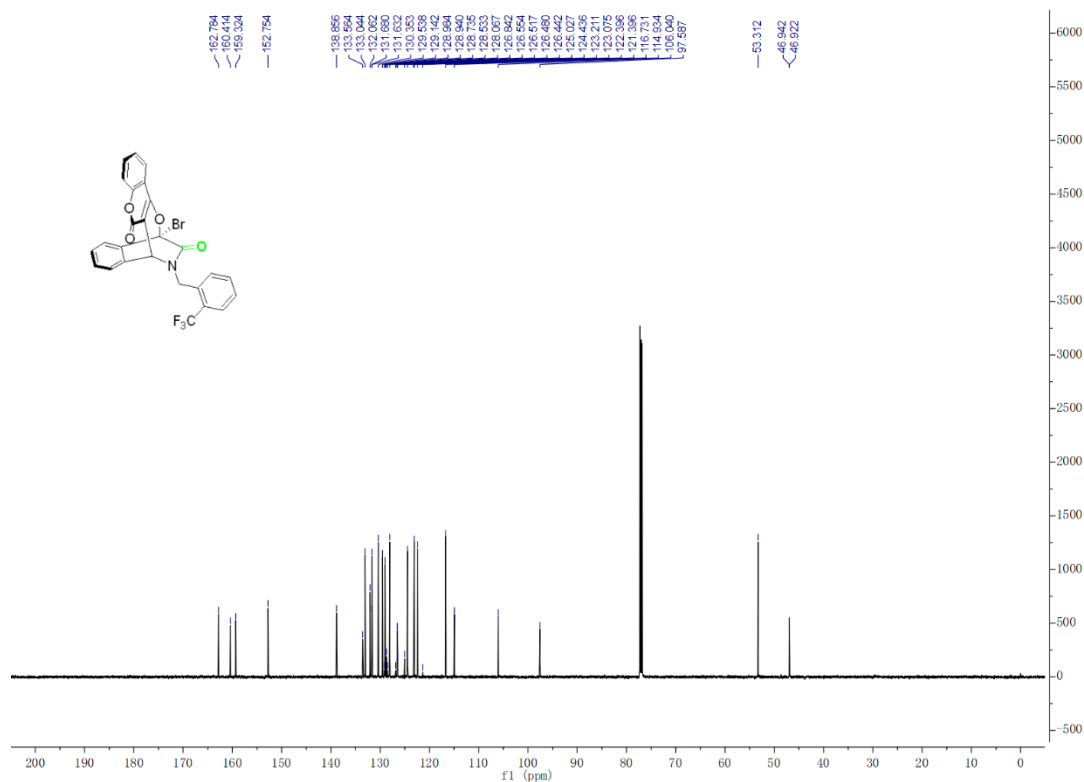

<sup>1</sup>H NMR and <sup>13</sup>C NMR spectra of compound **3o**

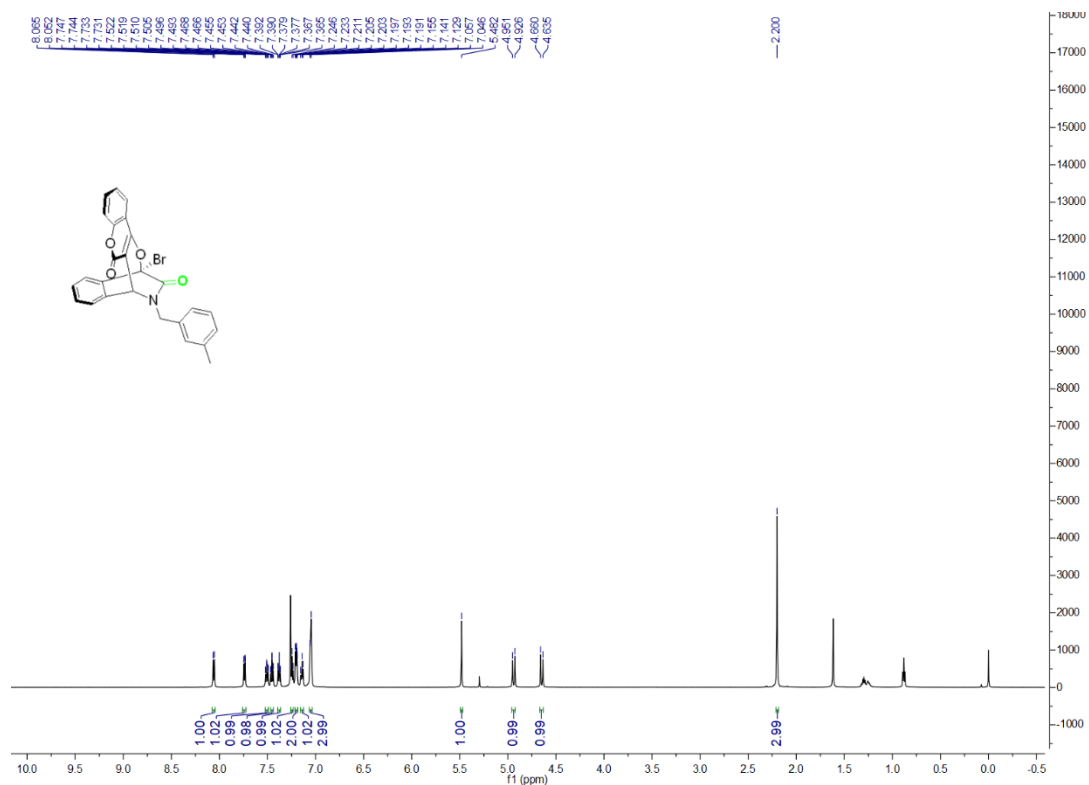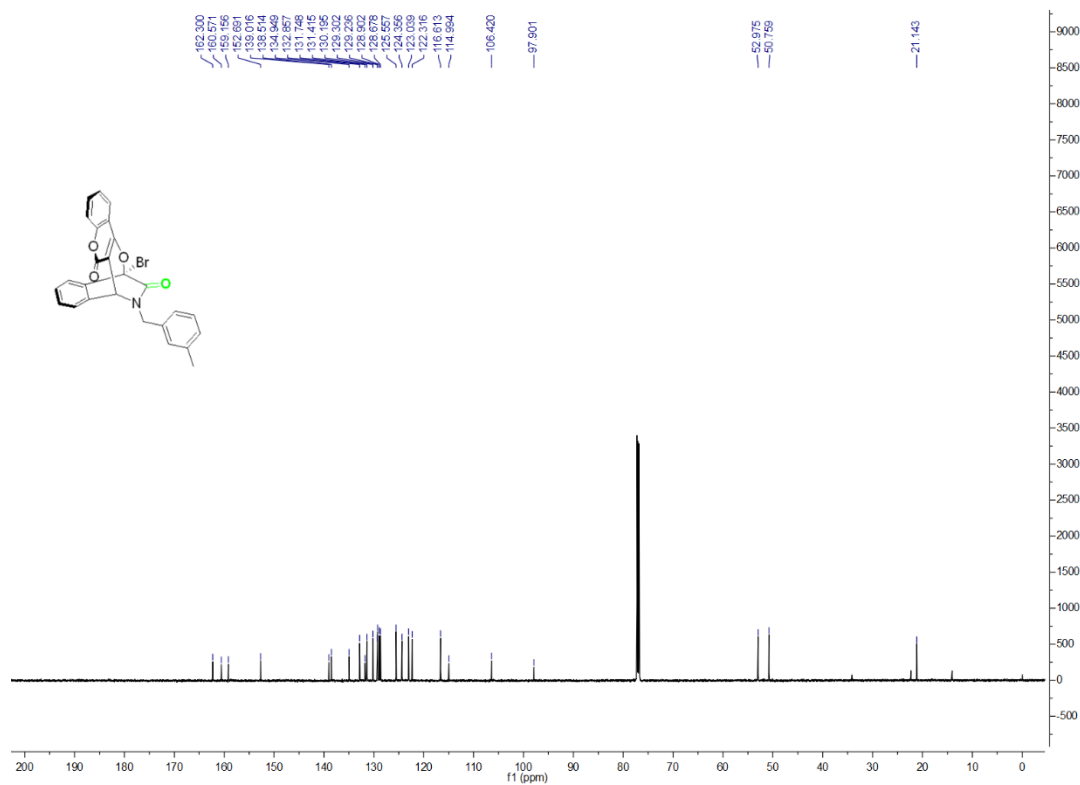



<sup>1</sup>H NMR and <sup>13</sup>C NMR spectra of compound **3p**

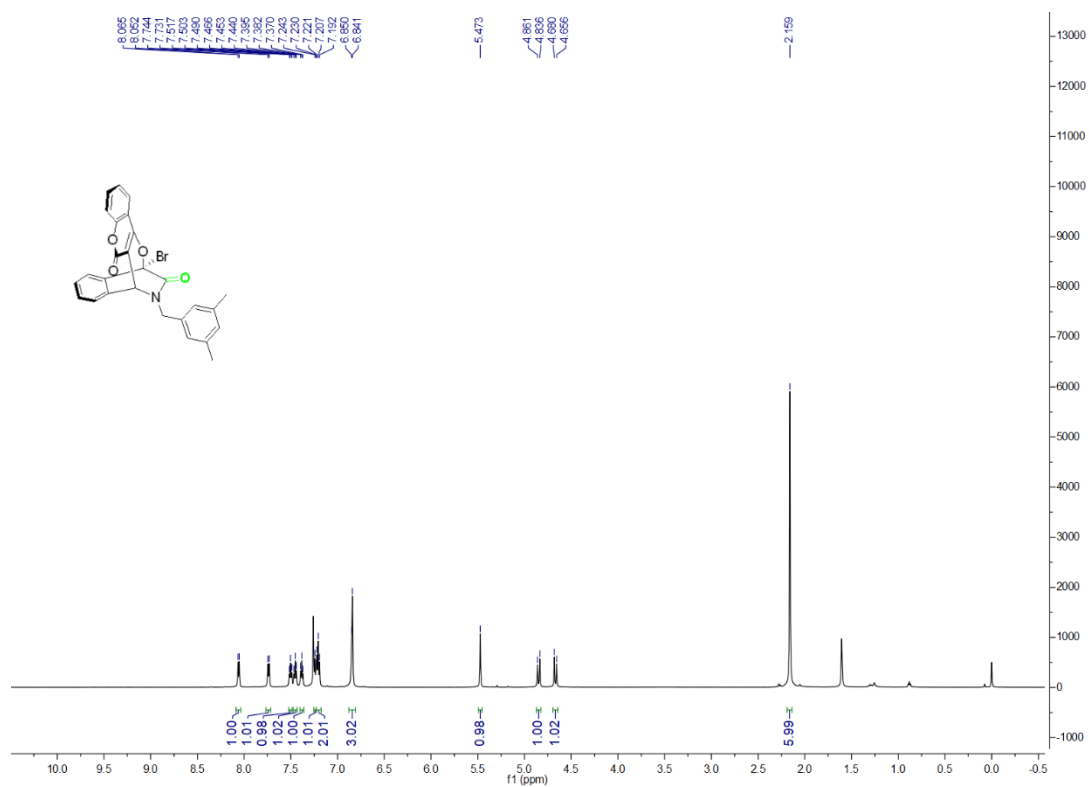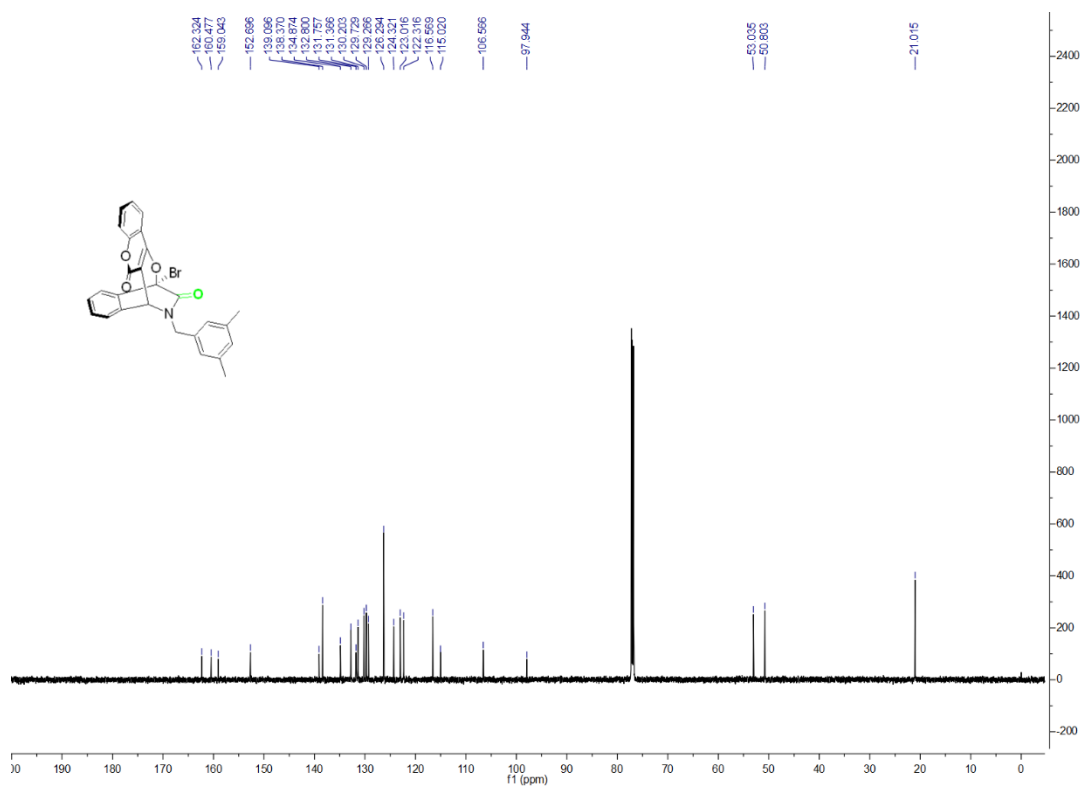

<sup>1</sup>H NMR and <sup>13</sup>C NMR spectra of compound **3q**

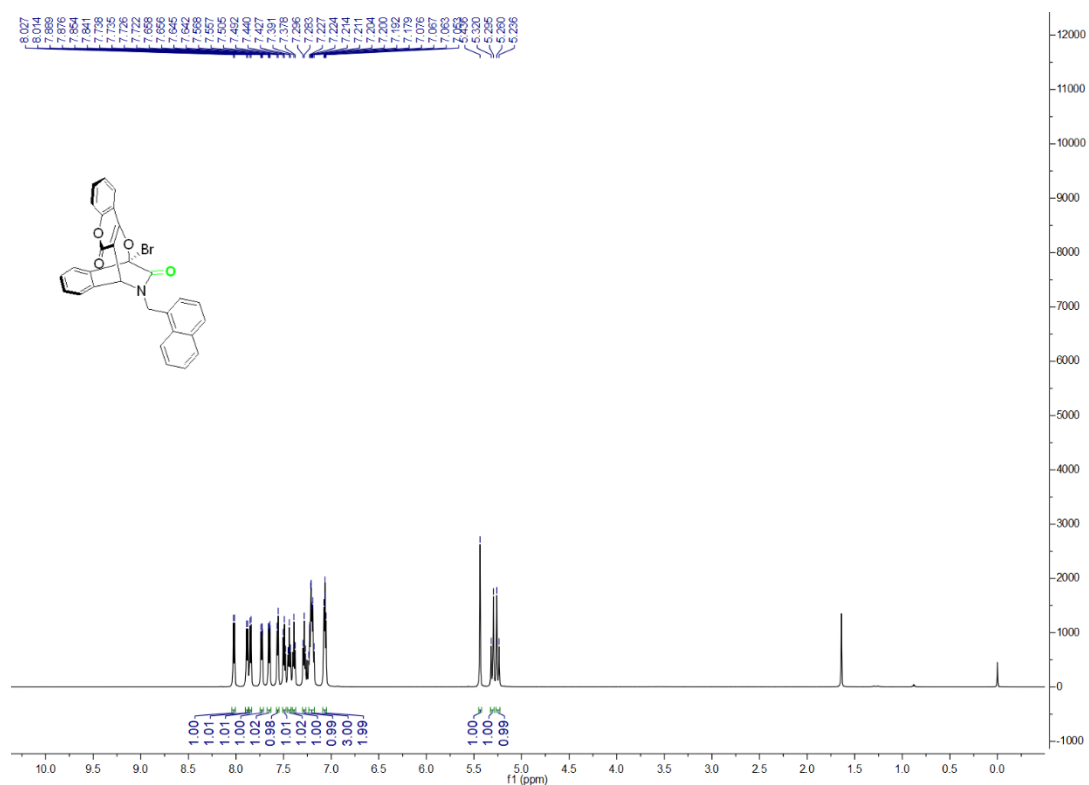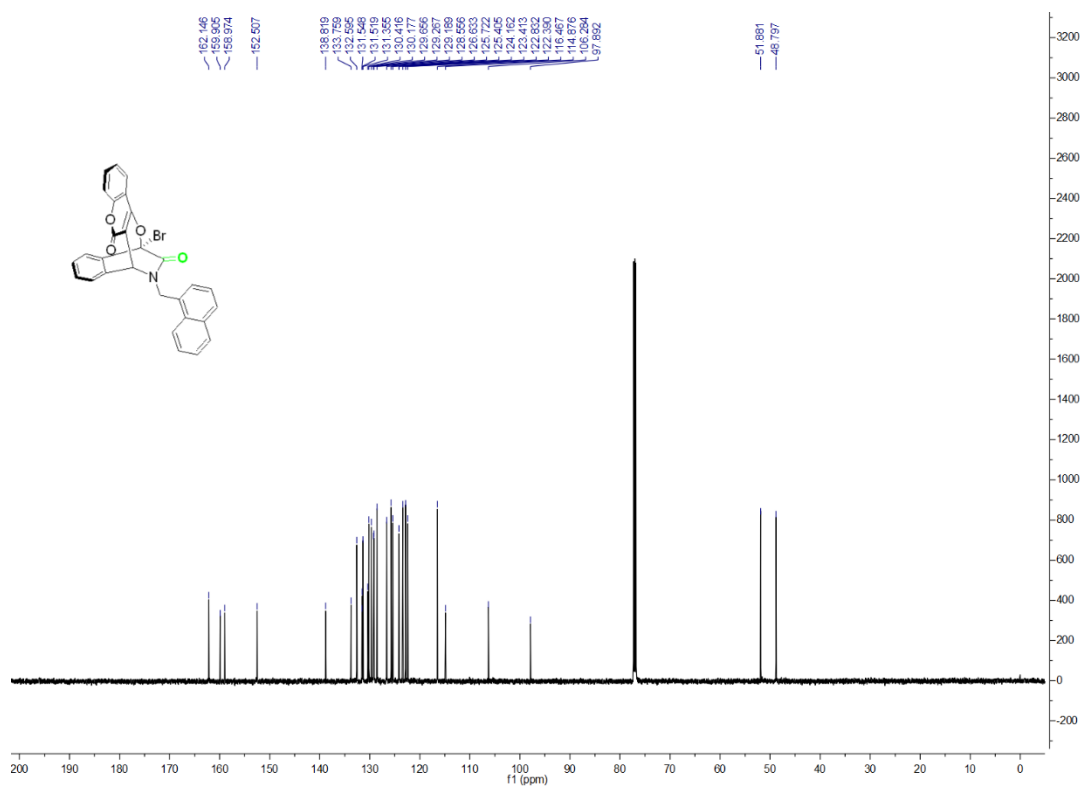

<sup>1</sup>H NMR and <sup>13</sup>C NMR spectra of compound **3r**

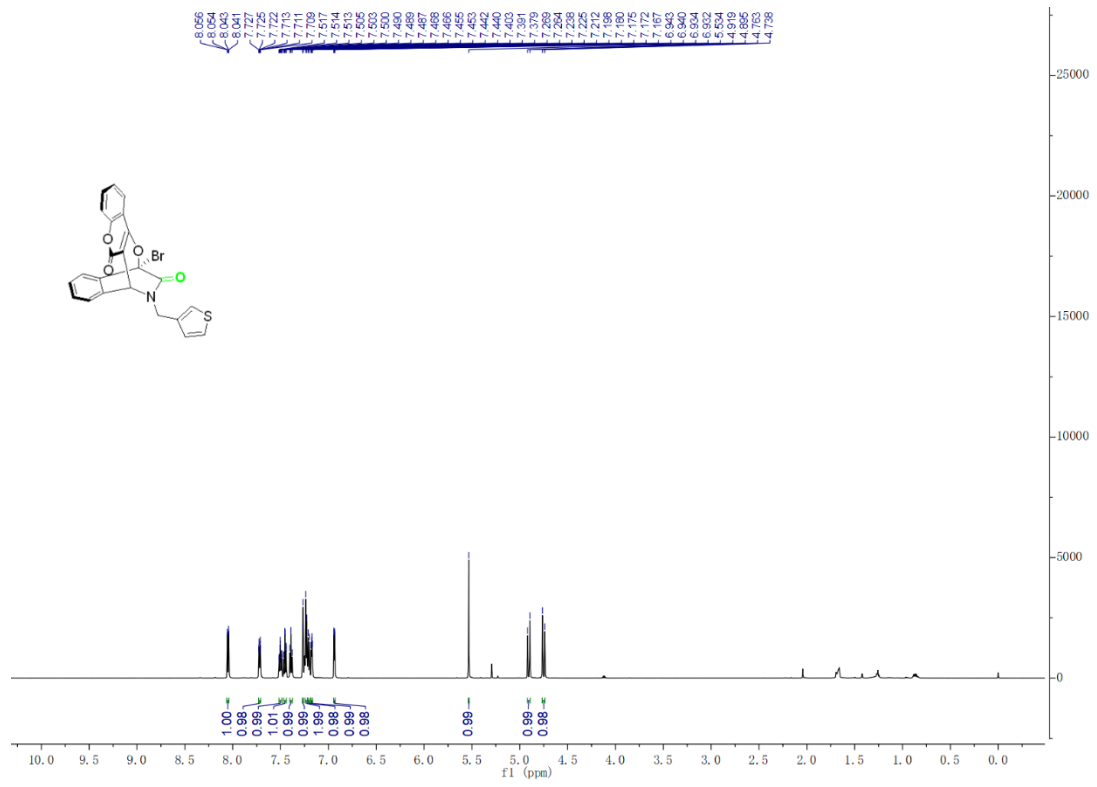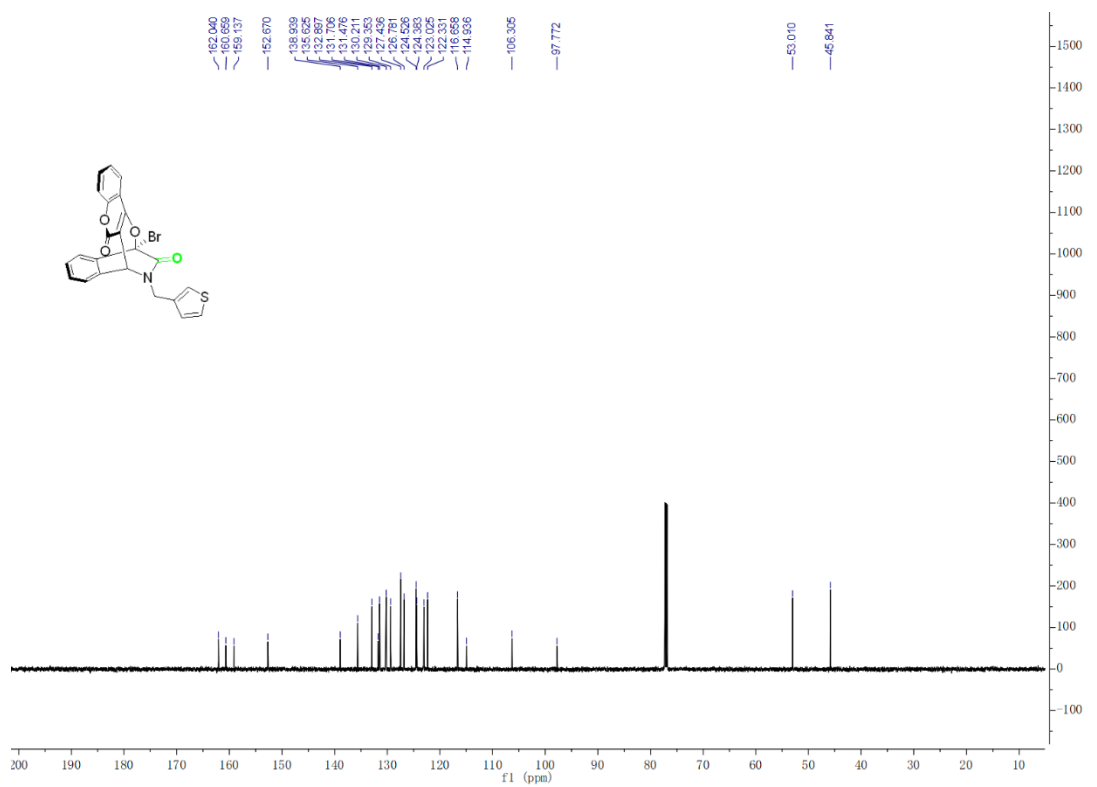

<sup>1</sup>H NMR and <sup>13</sup>C NMR spectra of compound **3s**

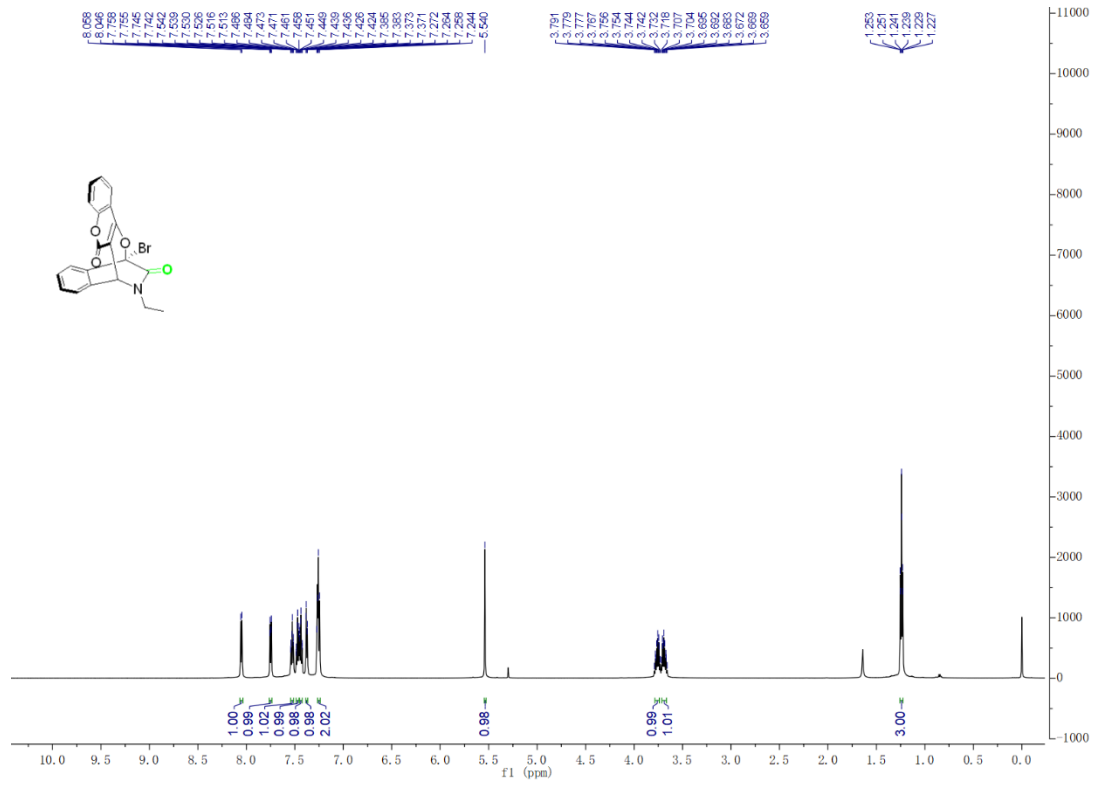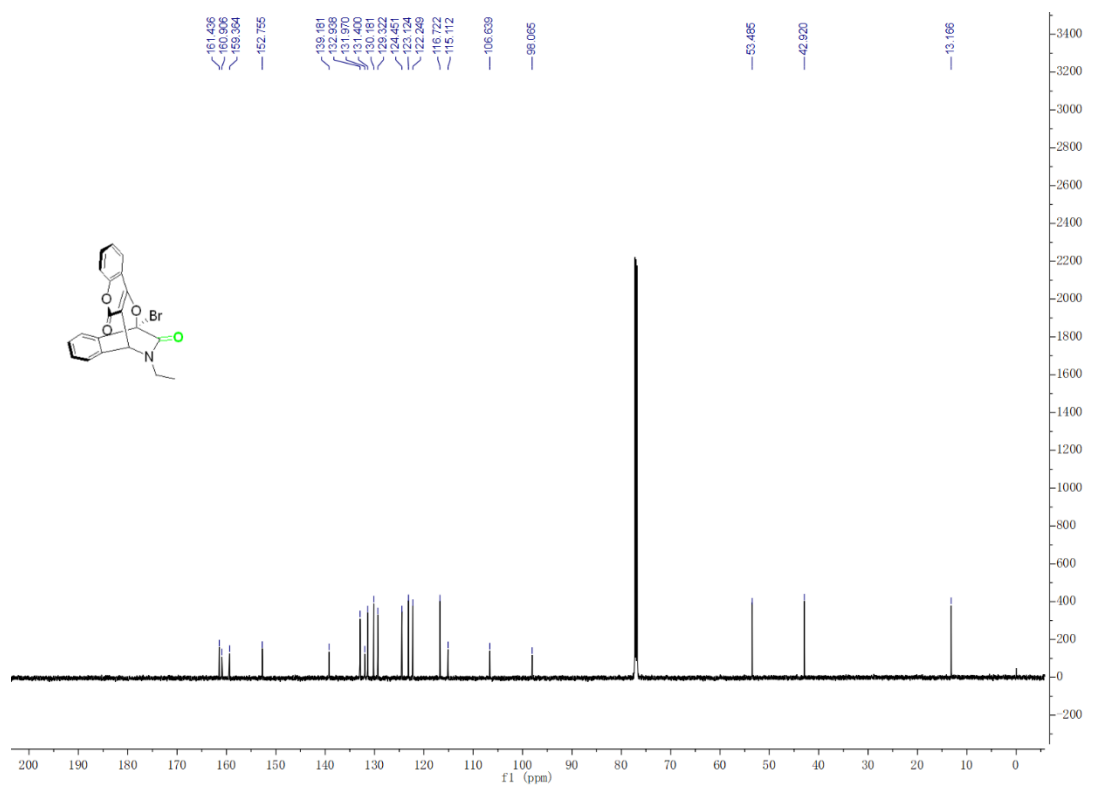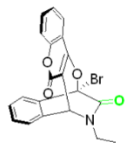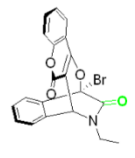

<sup>1</sup>H NMR and <sup>13</sup>C NMR spectra of compound **3t**

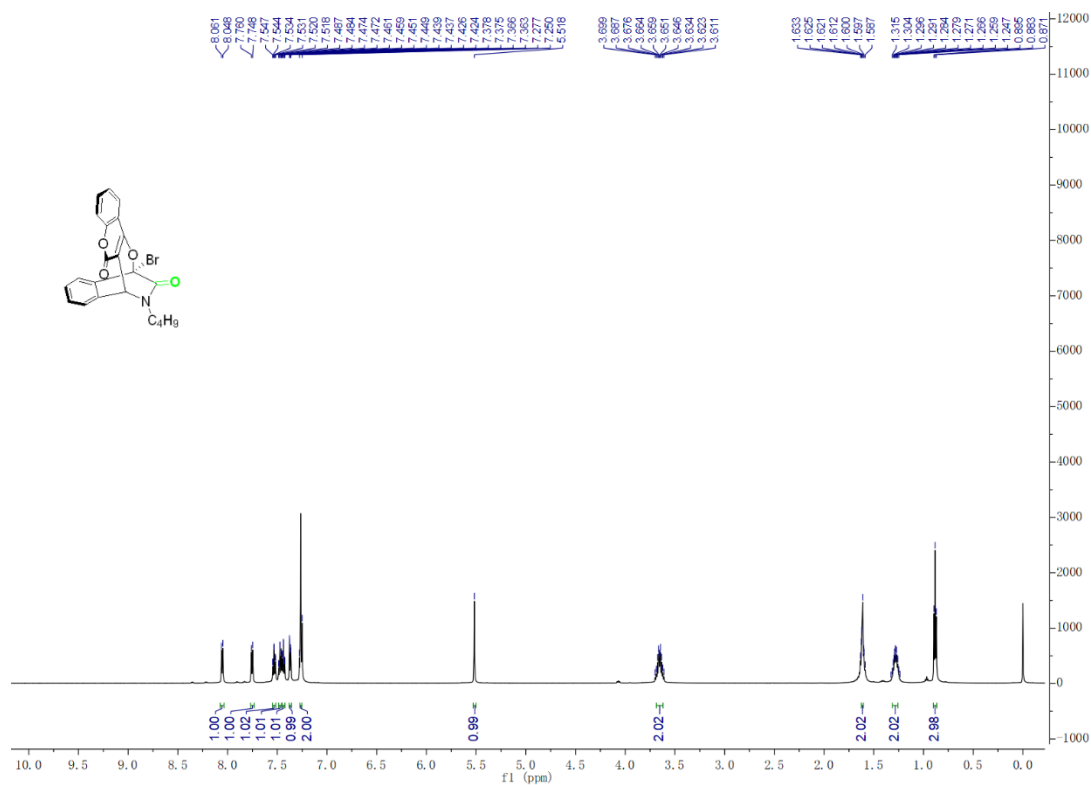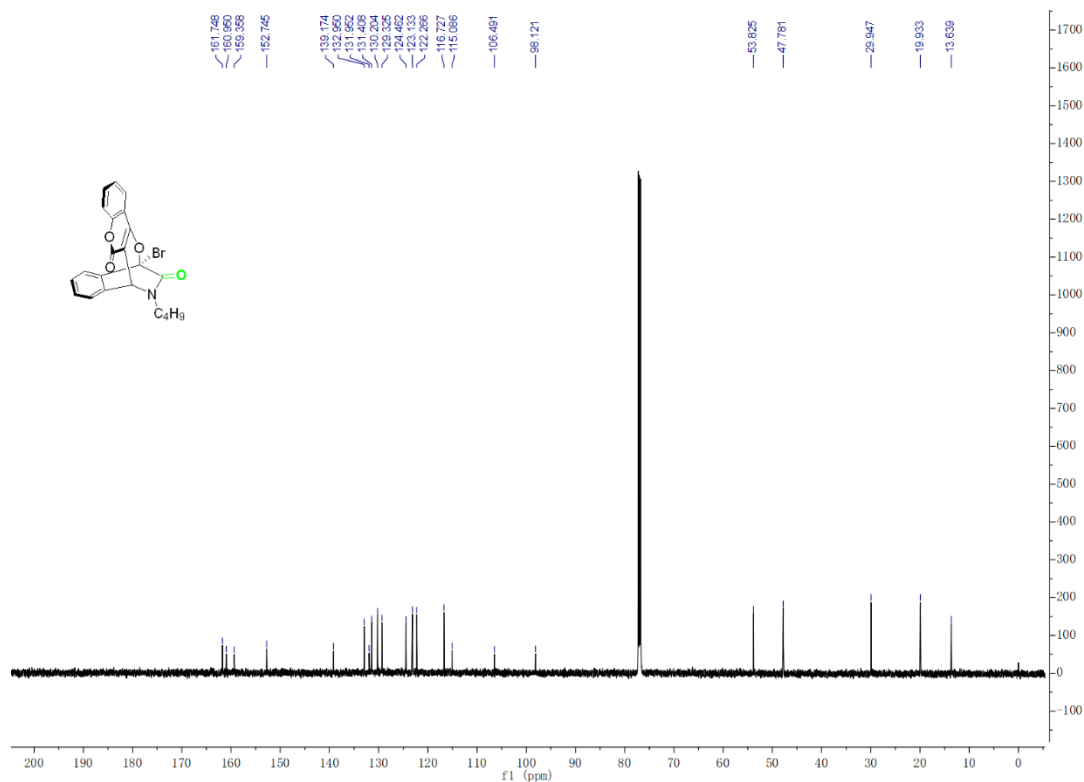

# <sup>1</sup>H NMR and <sup>13</sup>C NMR spectra of compound 3u

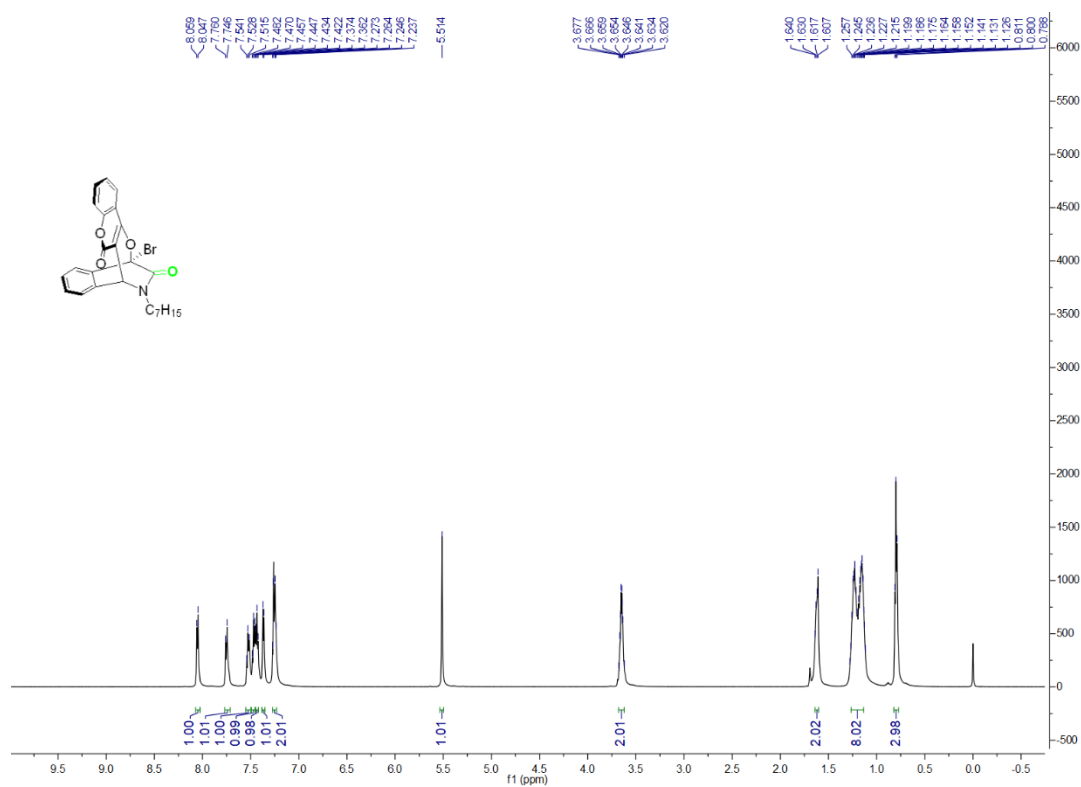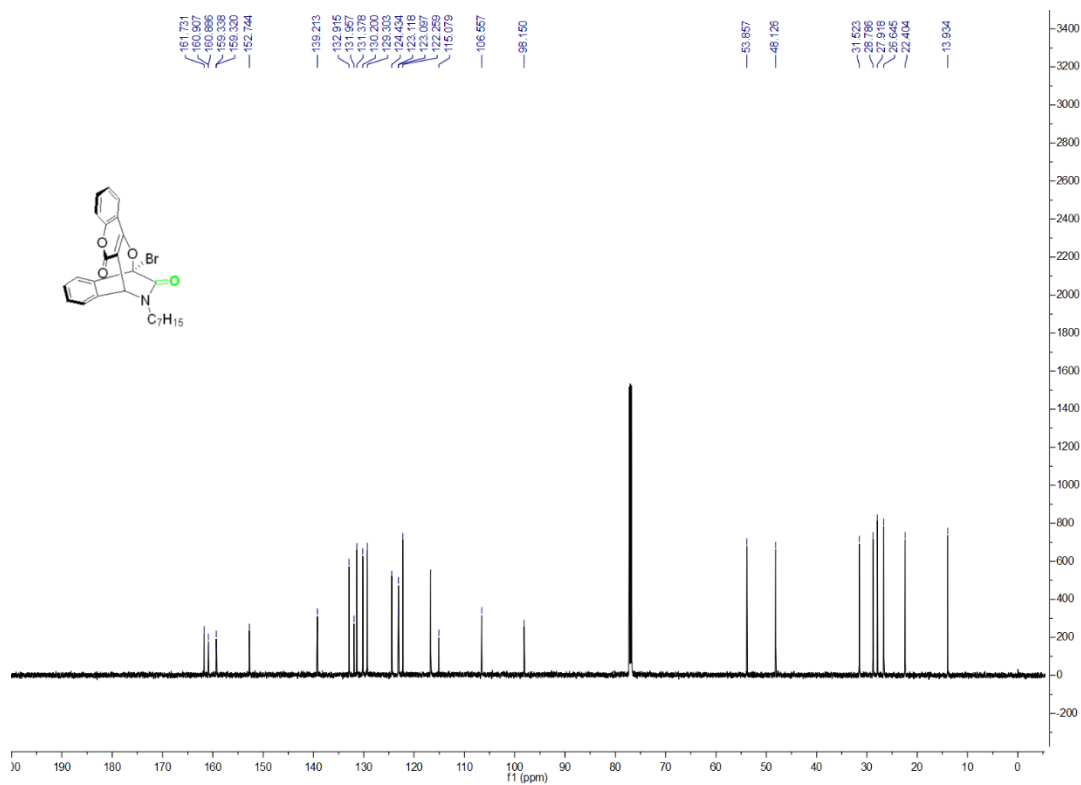

# <sup>1</sup>H NMR and <sup>13</sup>C NMR spectra of compound 3v

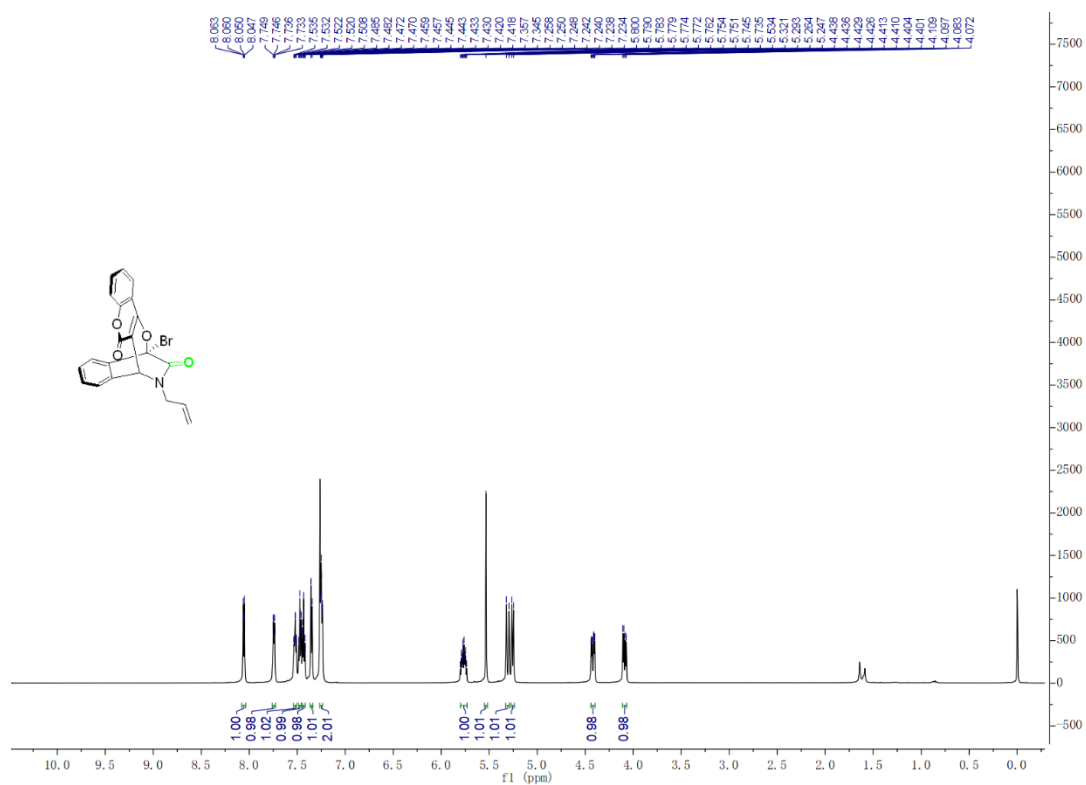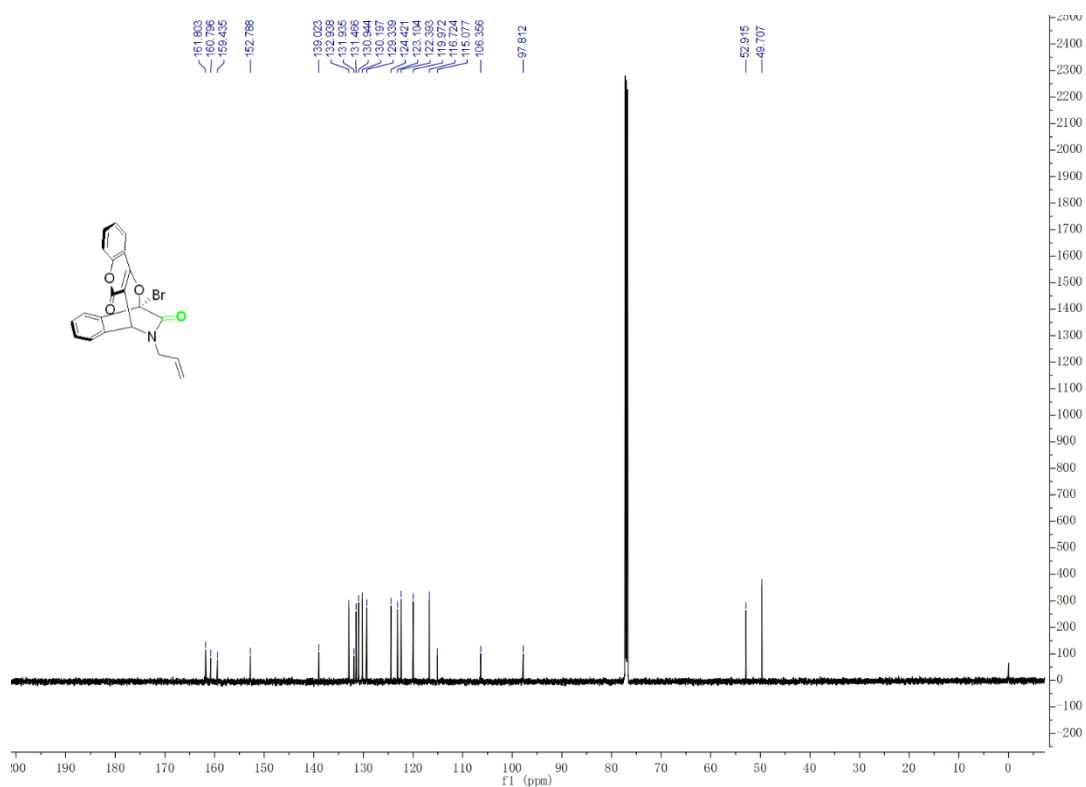





# <sup>1</sup>H NMR and <sup>13</sup>C NMR spectra of compound 3x

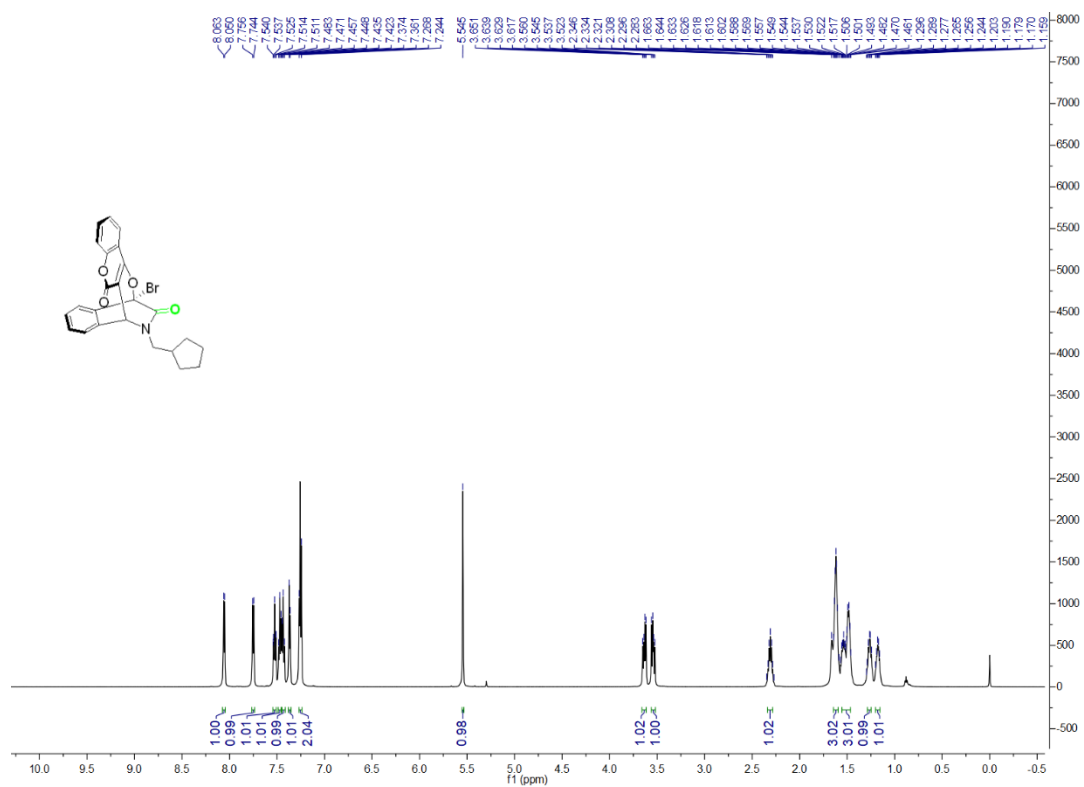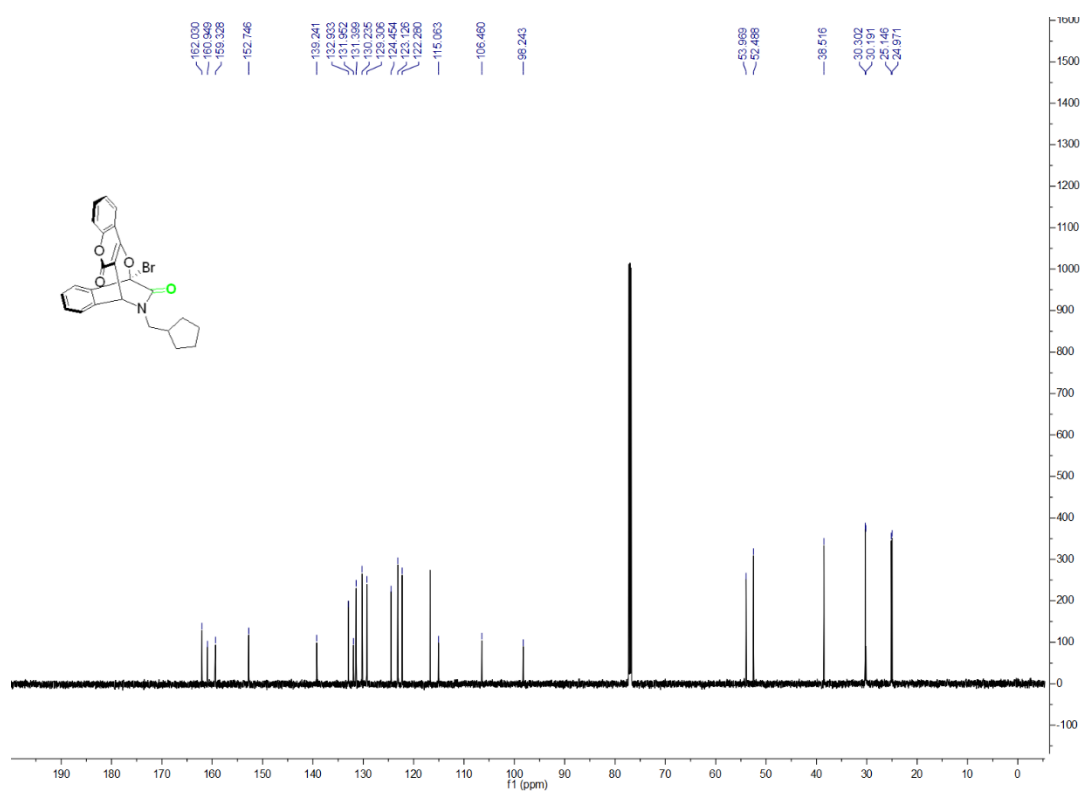

# <sup>1</sup>H NMR and <sup>13</sup>C NMR spectra of compound 3y

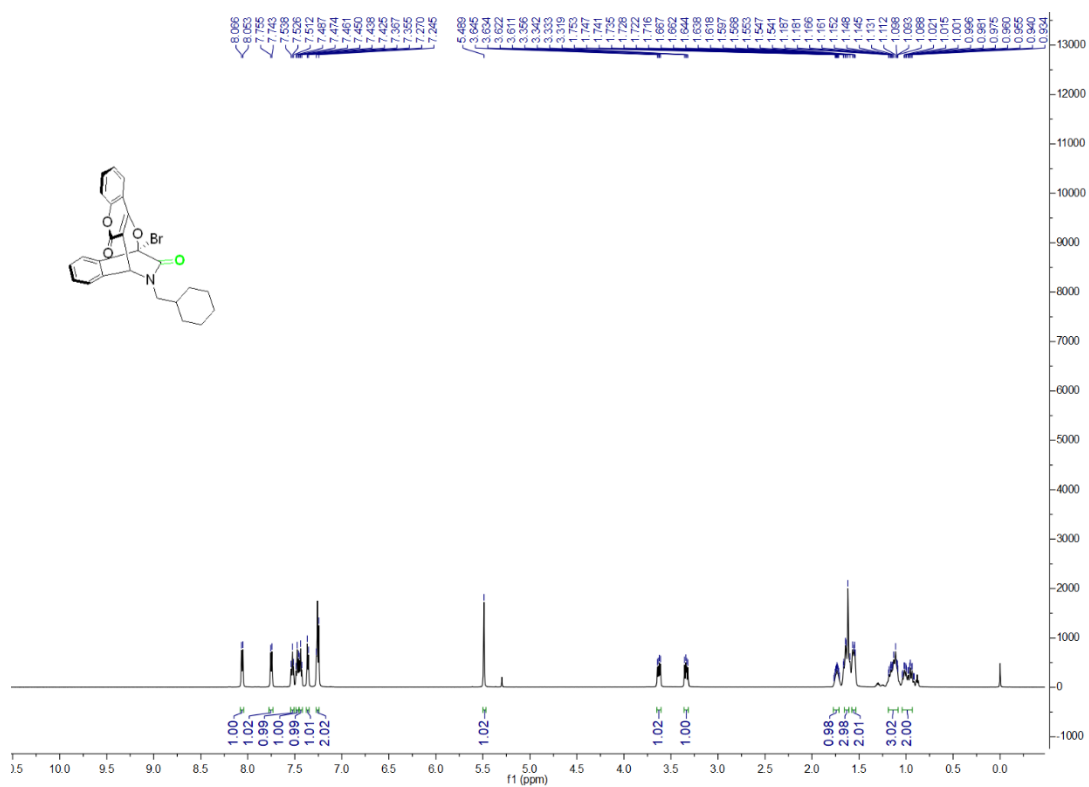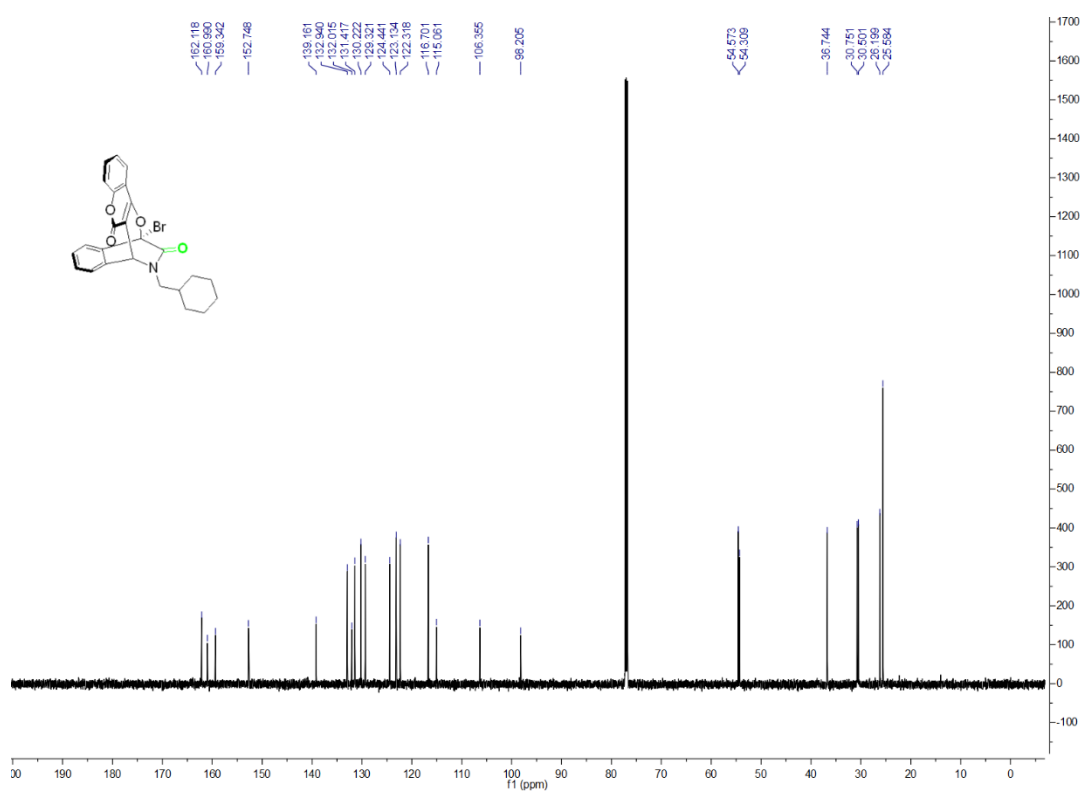

<sup>1</sup>H NMR and <sup>13</sup>C NMR spectra of compound **3z**

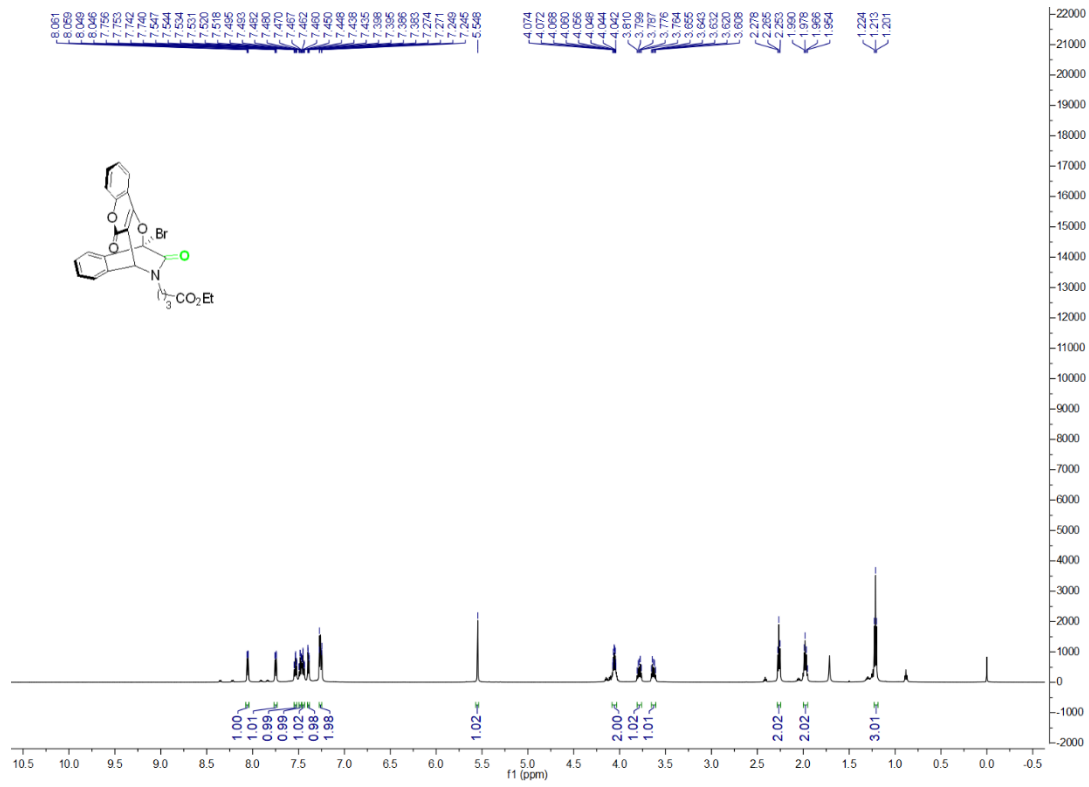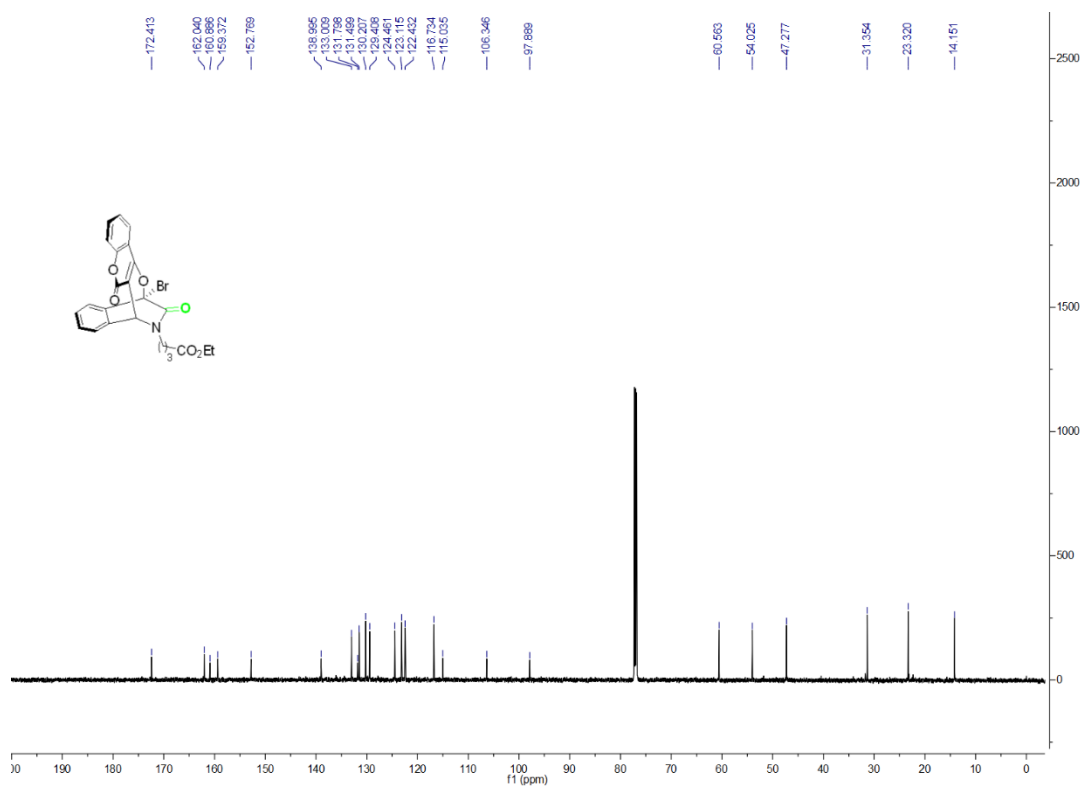

<sup>1</sup>H NMR and <sup>13</sup>C NMR spectra of compound **3aa** (recrystal in DCM)

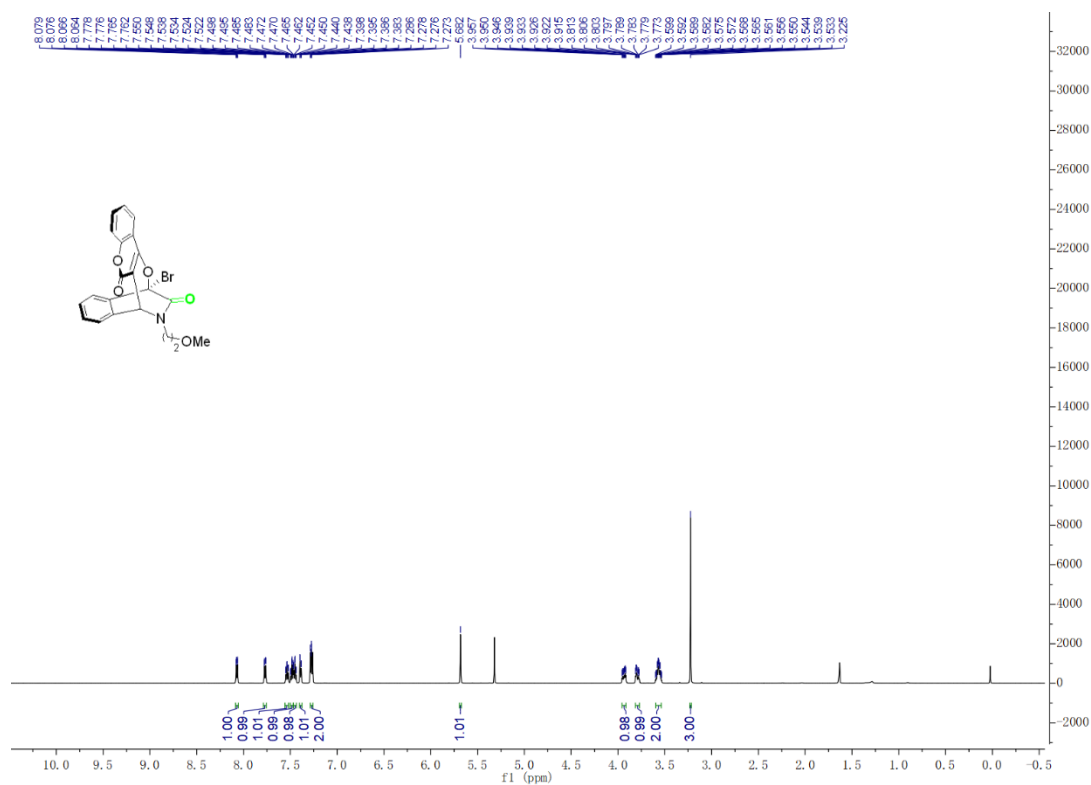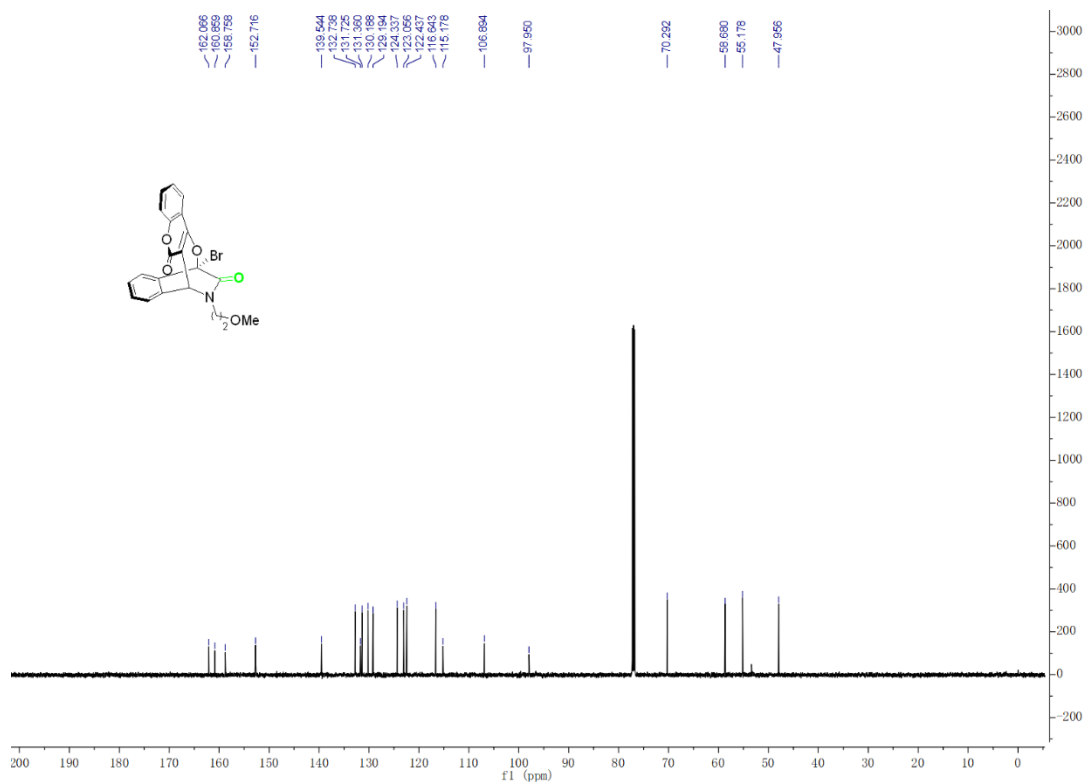

<sup>1</sup>H NMR and <sup>13</sup>C NMR spectra of compound **3ab**

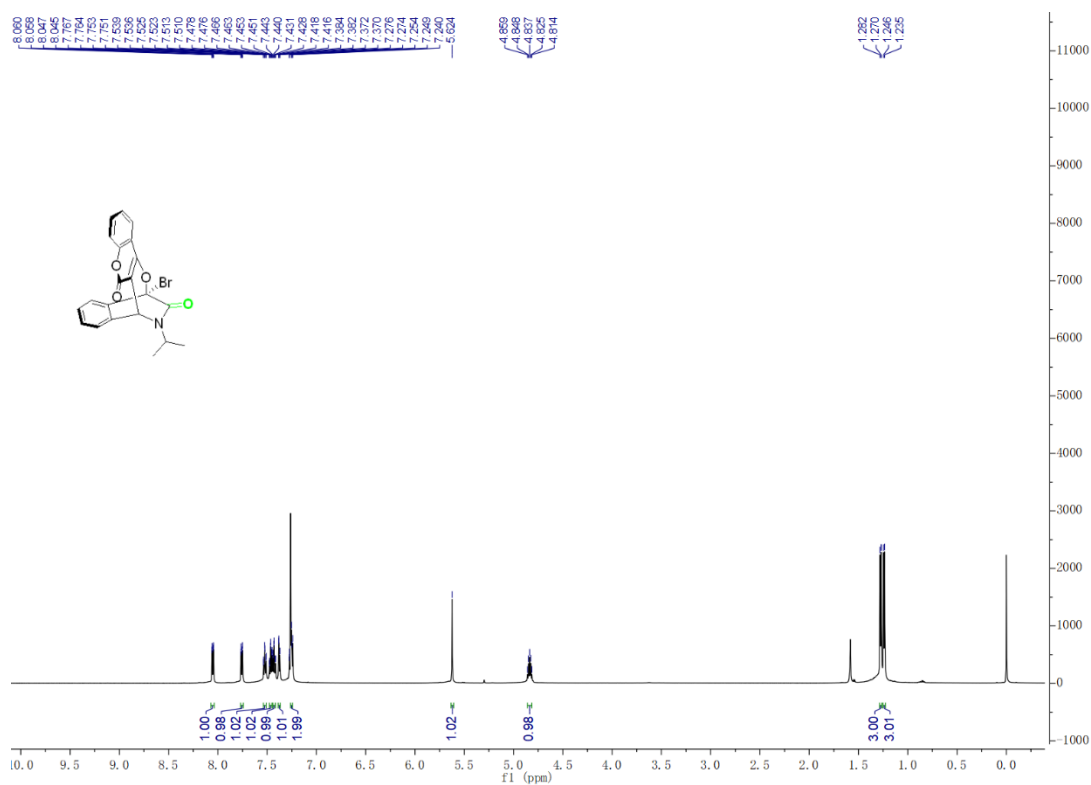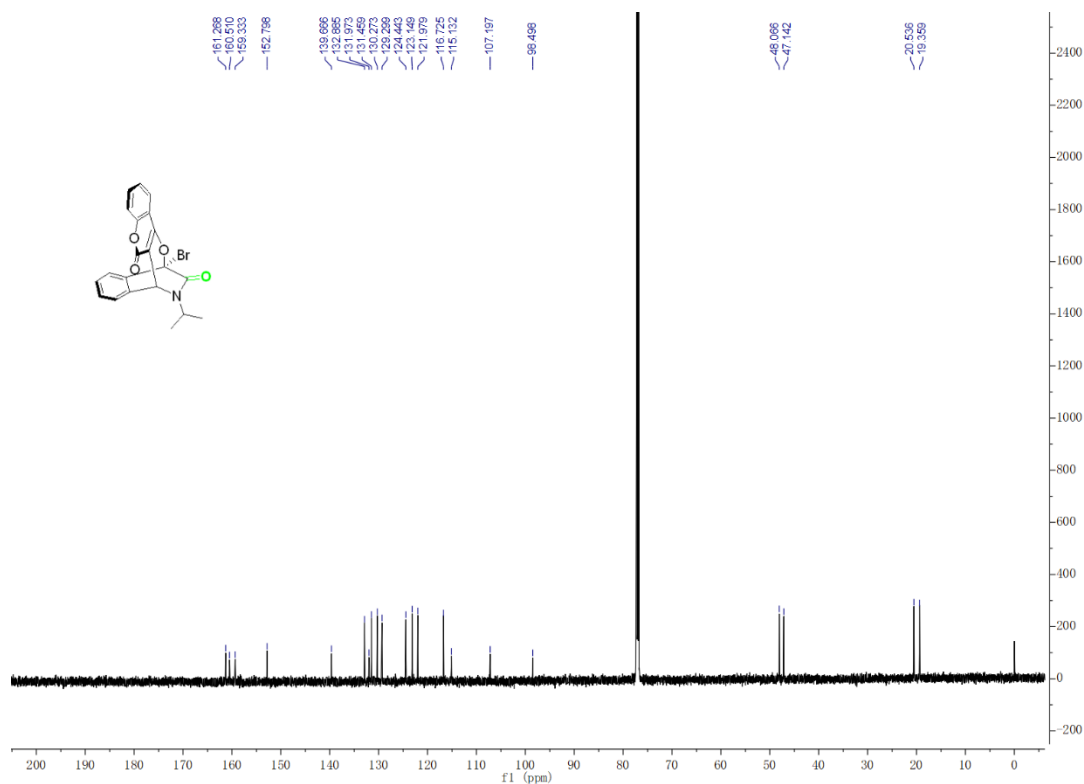

<sup>1</sup>H NMR and <sup>13</sup>C NMR spectra of compound **3ac**

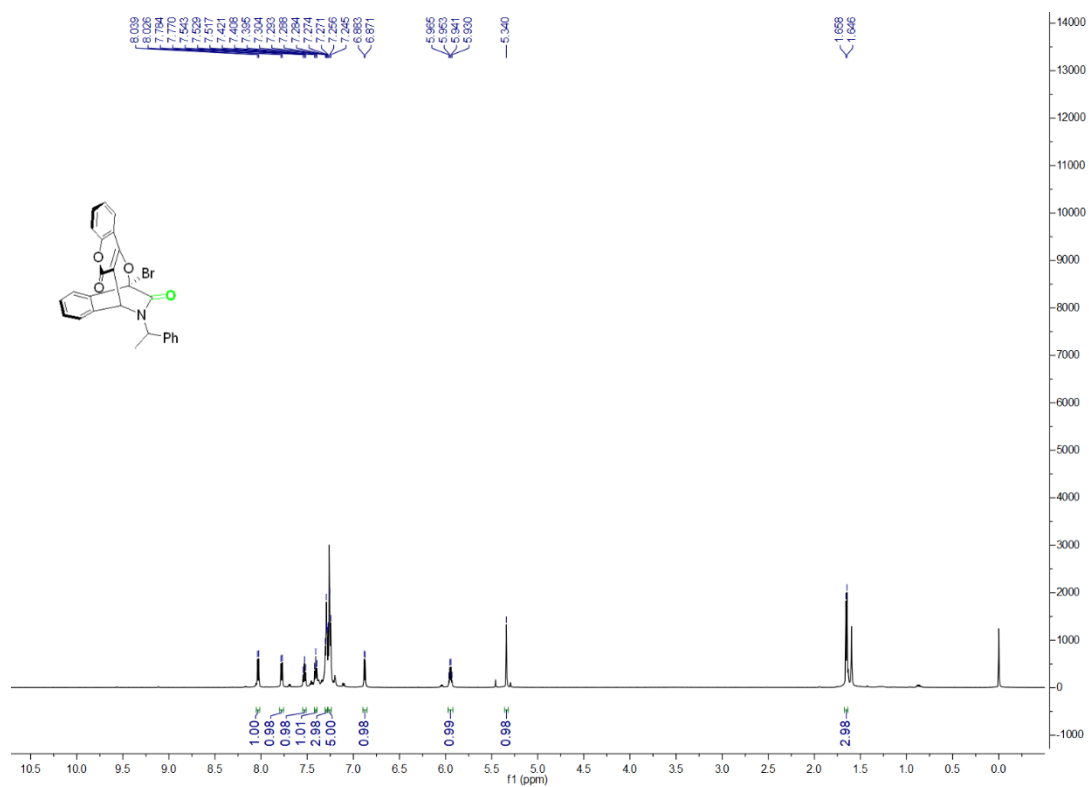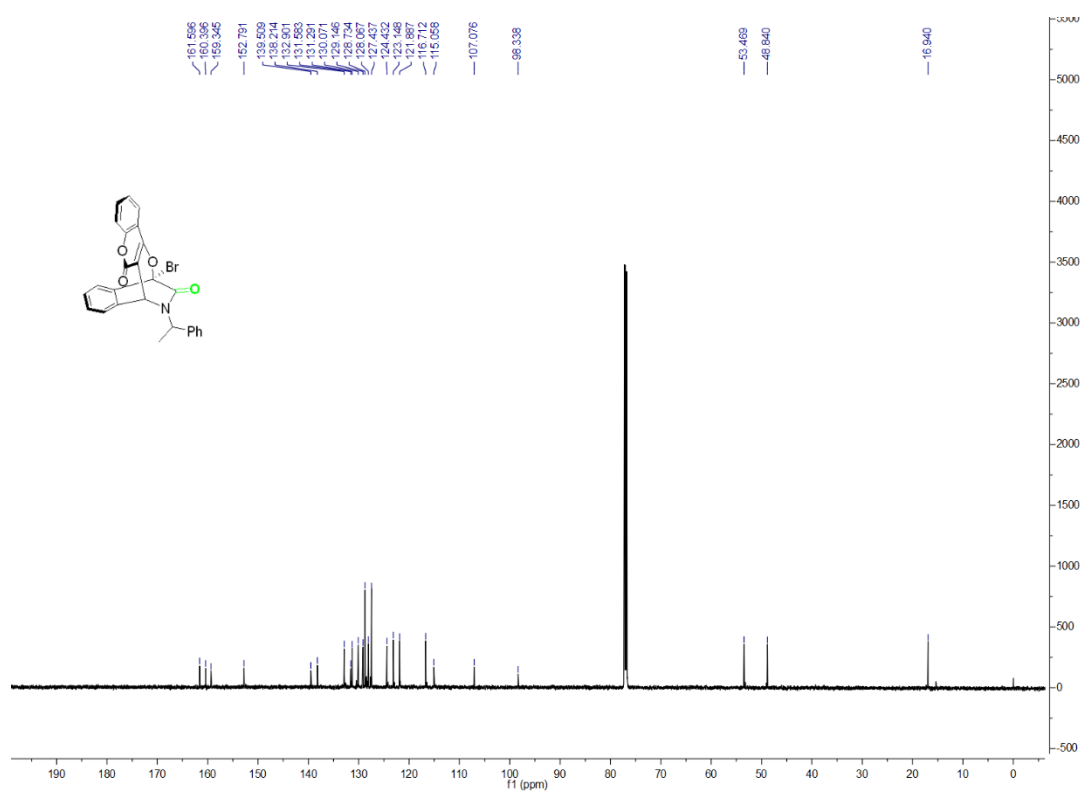

# <sup>1</sup>H NMR and <sup>13</sup>C NMR spectra of compound 3ad

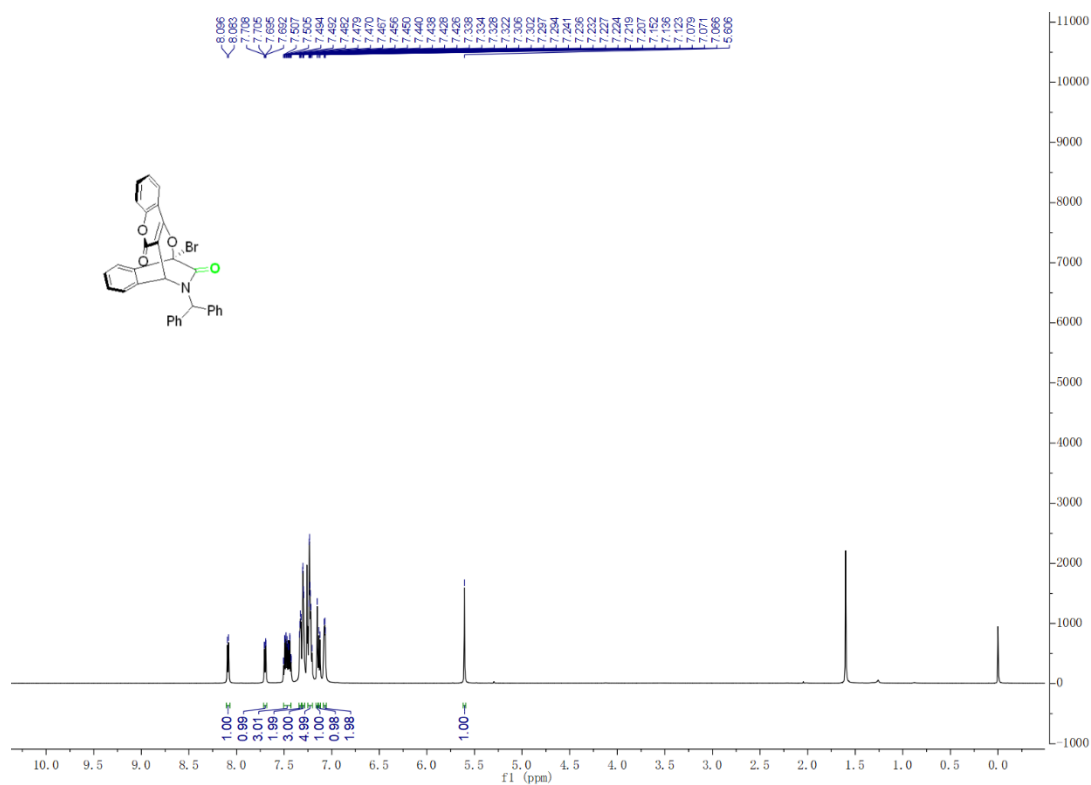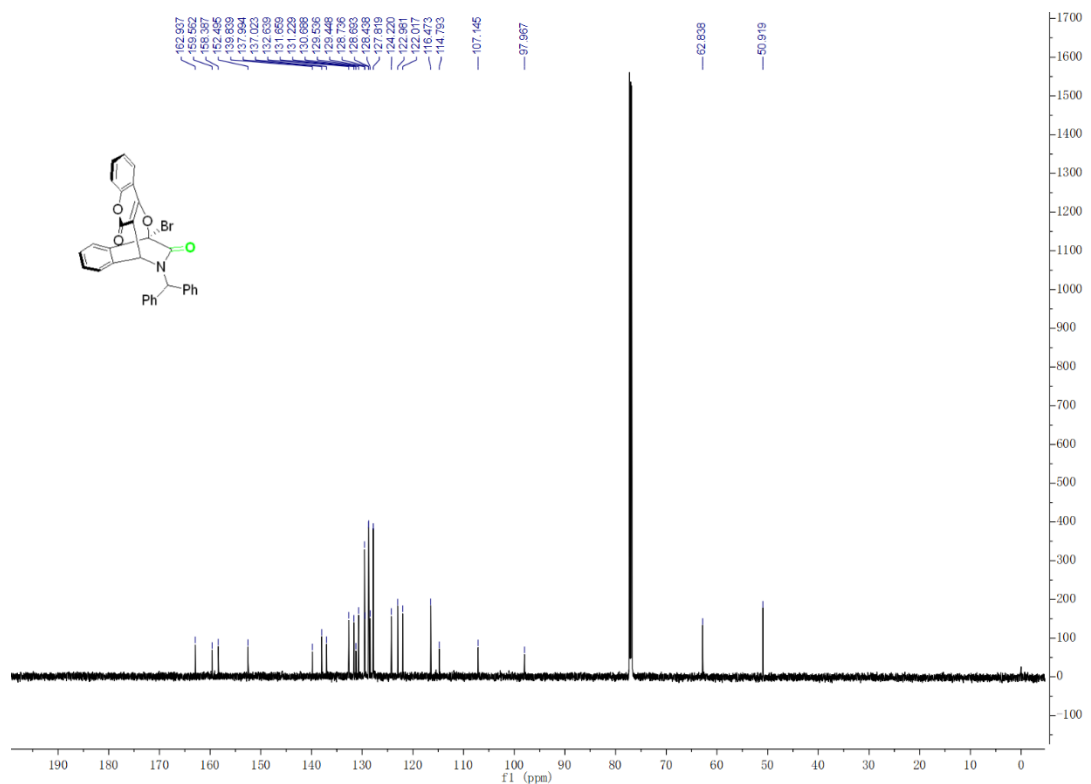

<sup>1</sup>H NMR and <sup>13</sup>C NMR spectra of compound **3ae**

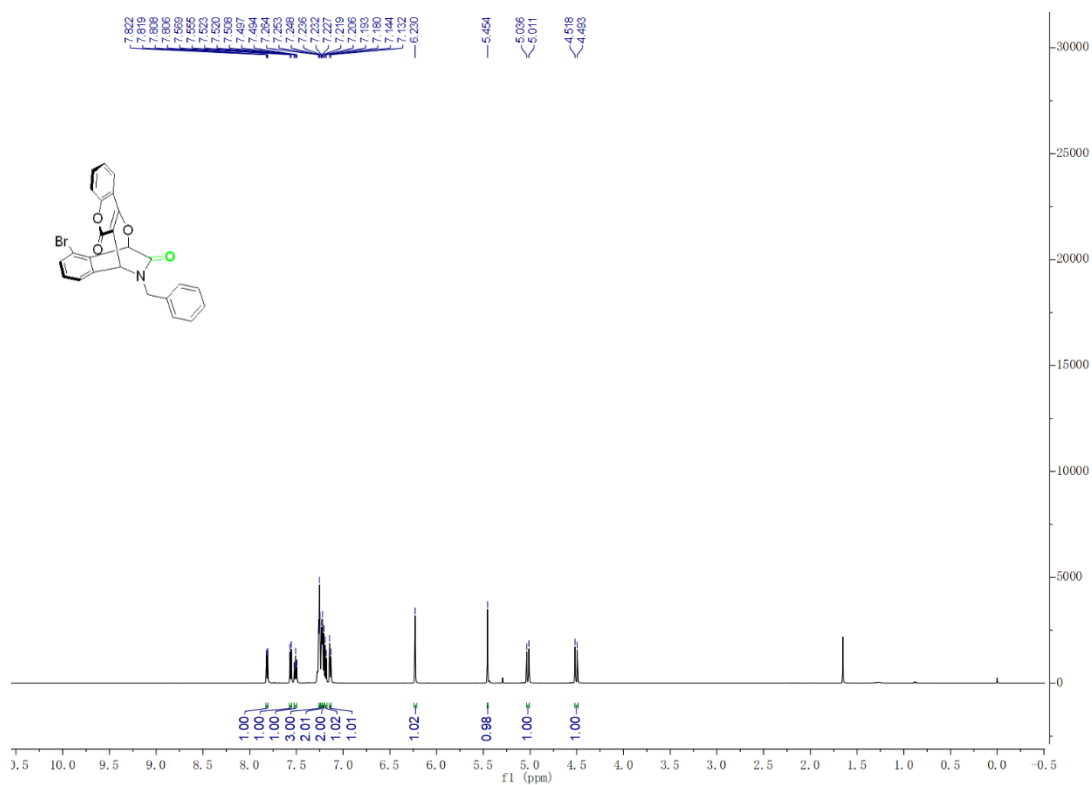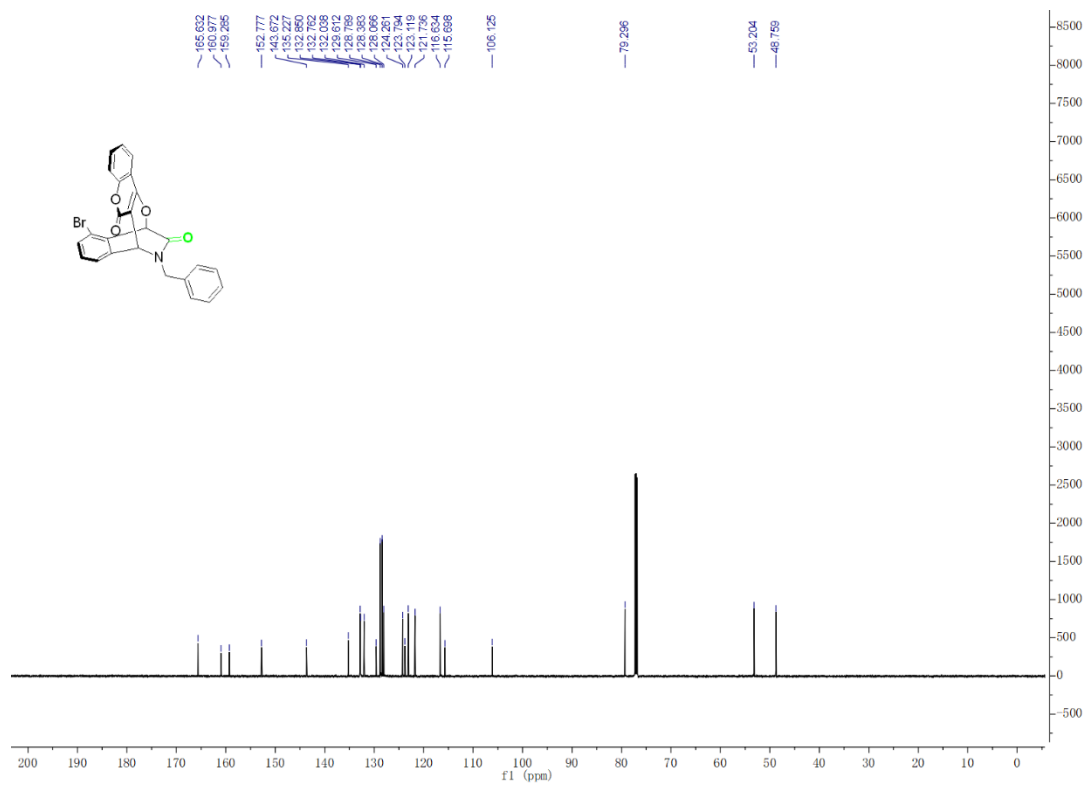



<sup>1</sup>H NMR and <sup>13</sup>C NMR spectra of compound **3af**

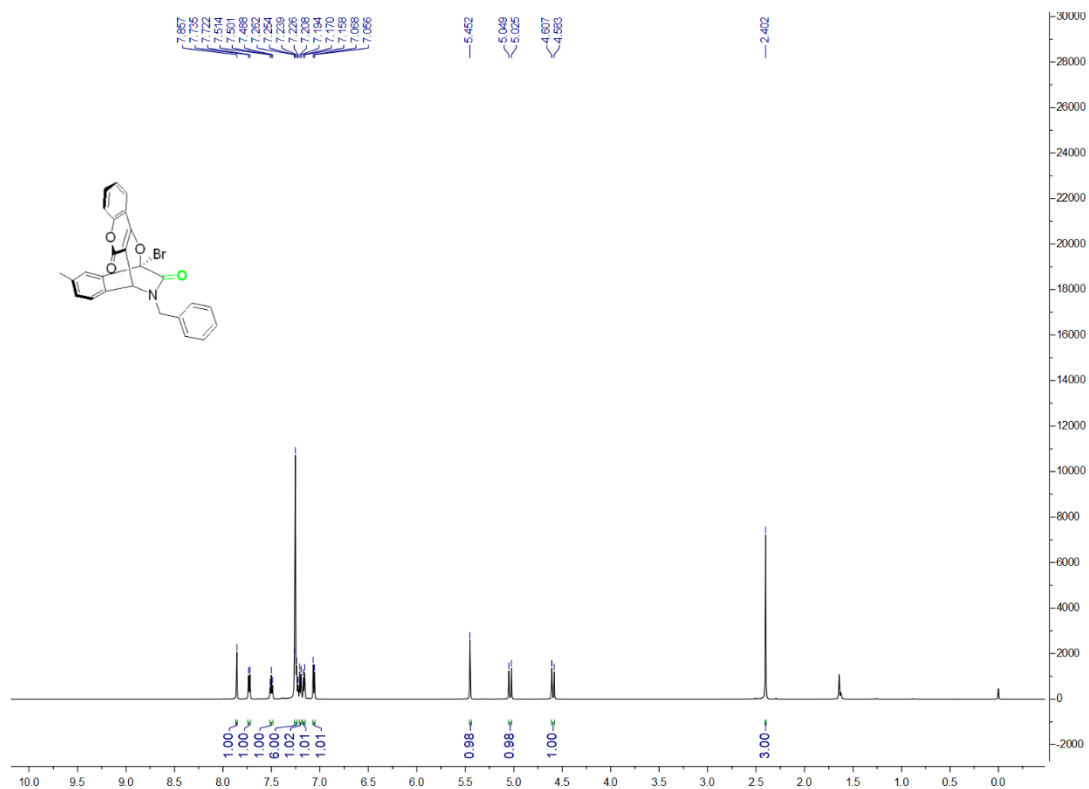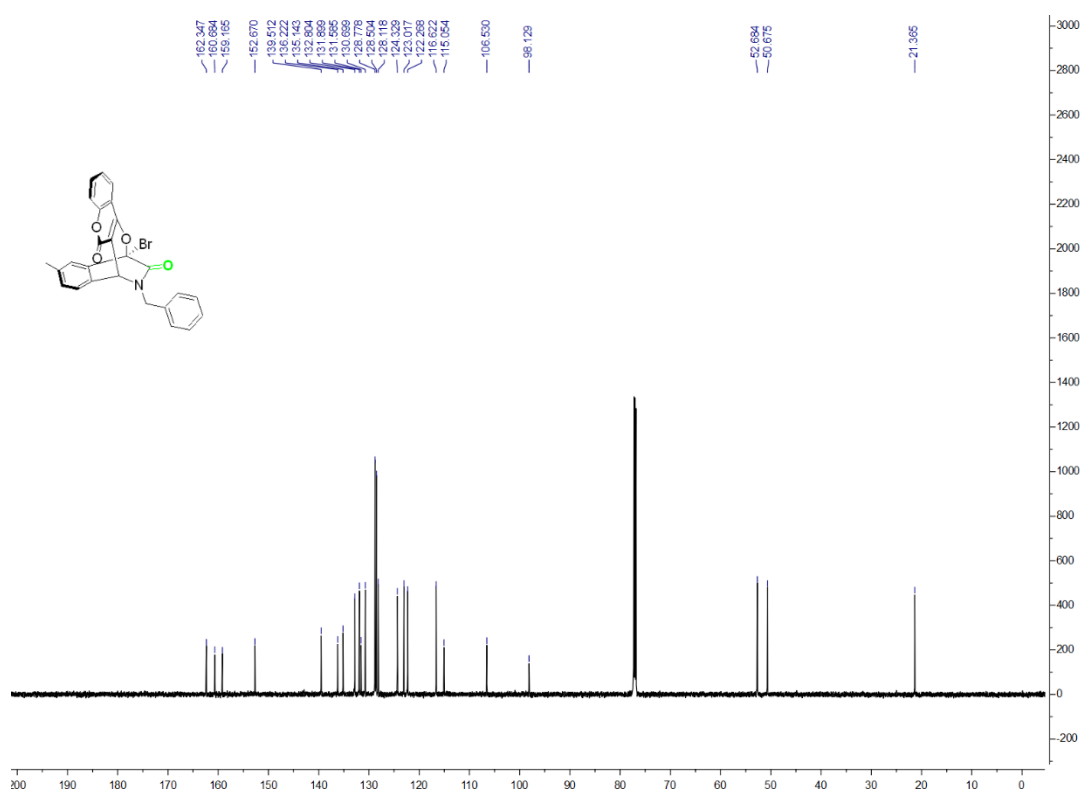

# <sup>1</sup>H NMR and <sup>13</sup>C NMR spectra of compound **3ag**

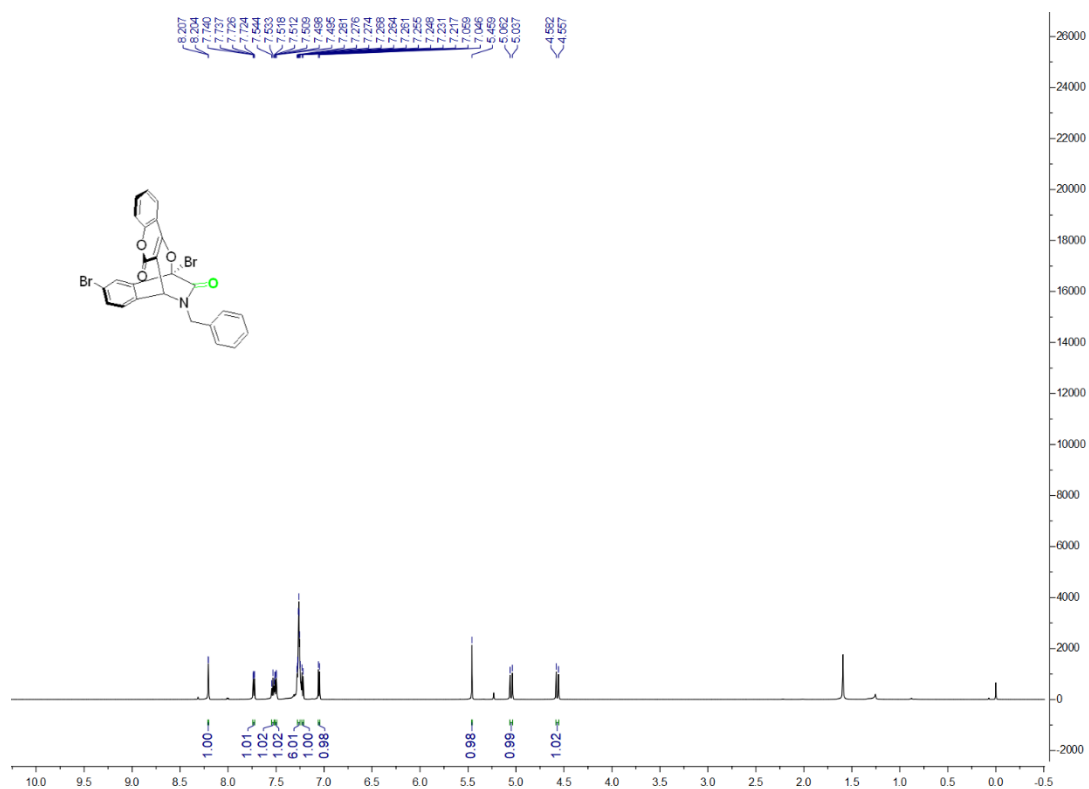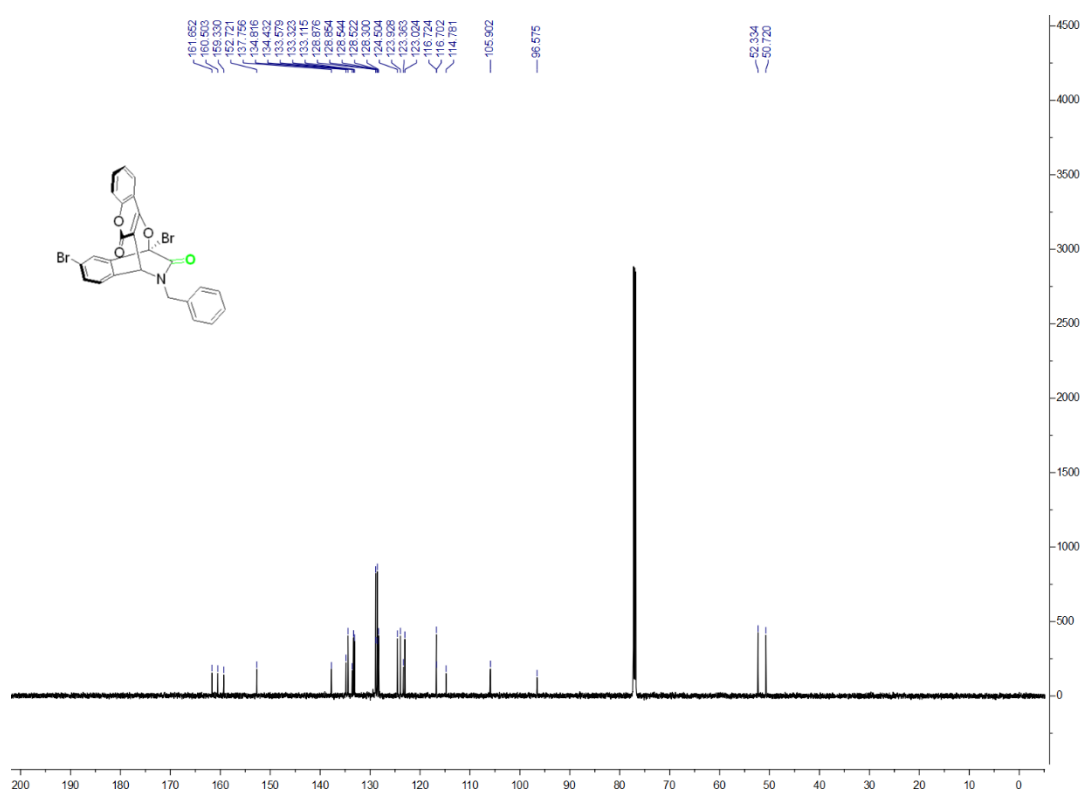

<sup>1</sup>H NMR and <sup>13</sup>C NMR spectra of compound **3ah**

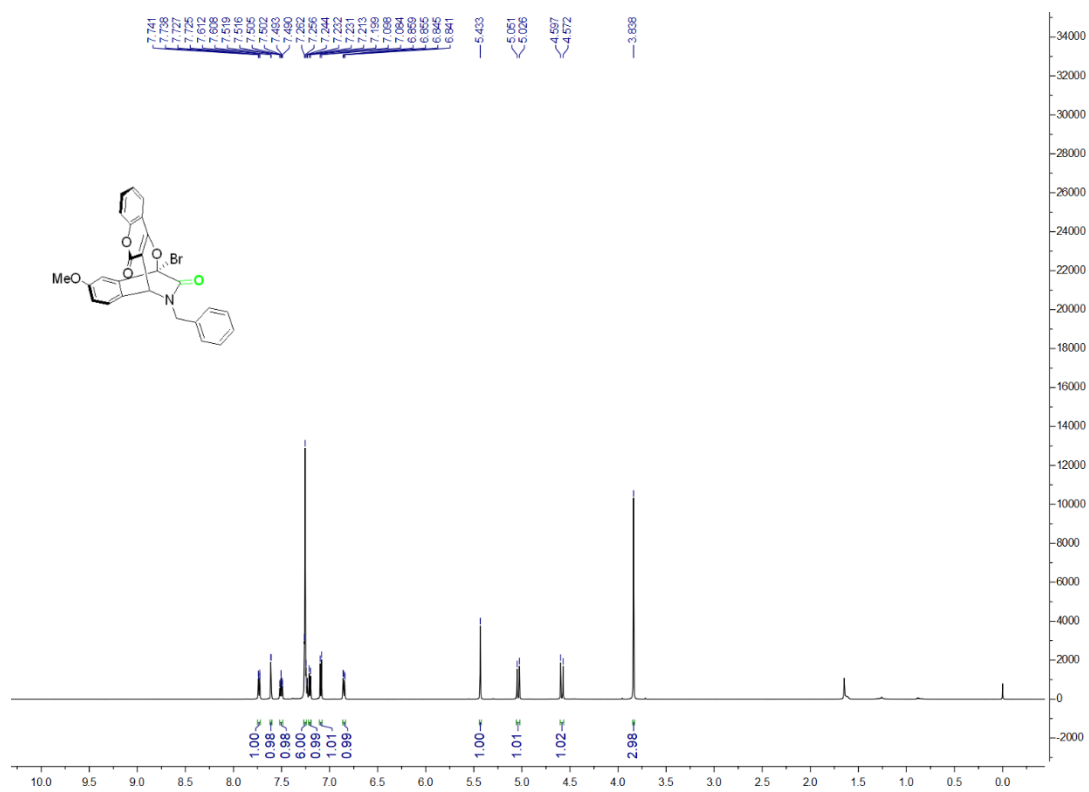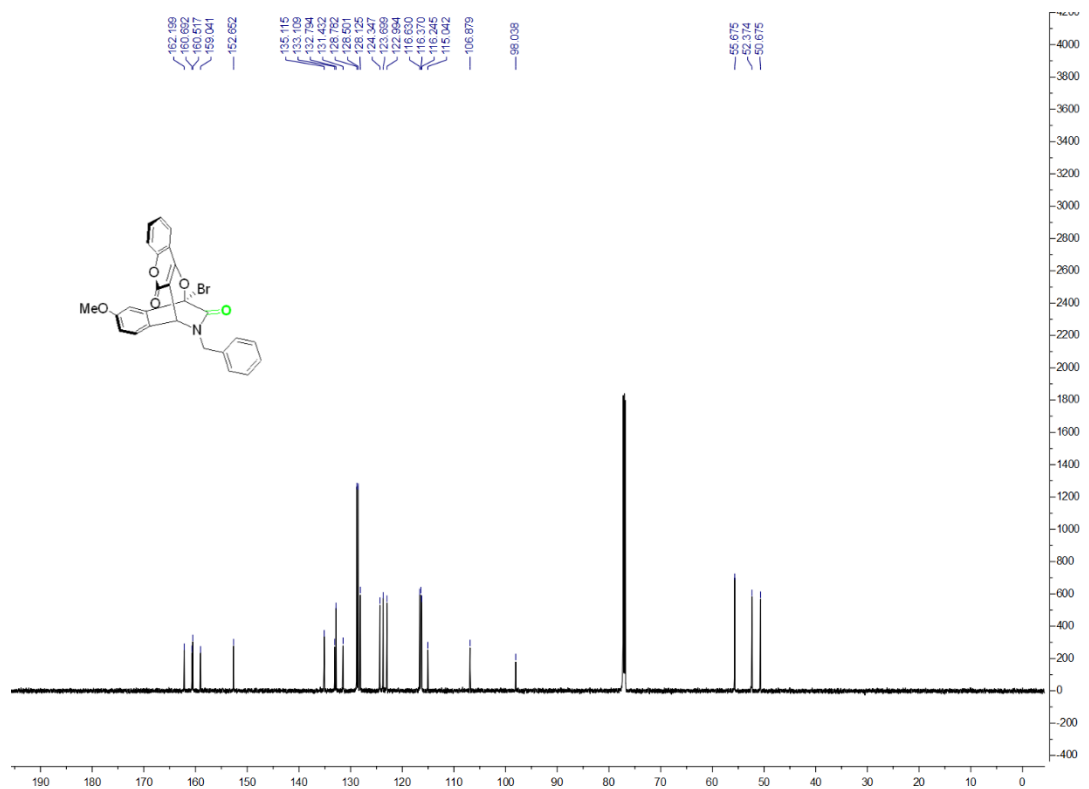

<sup>1</sup>H NMR and <sup>13</sup>C NMR spectra of compound **3aj**

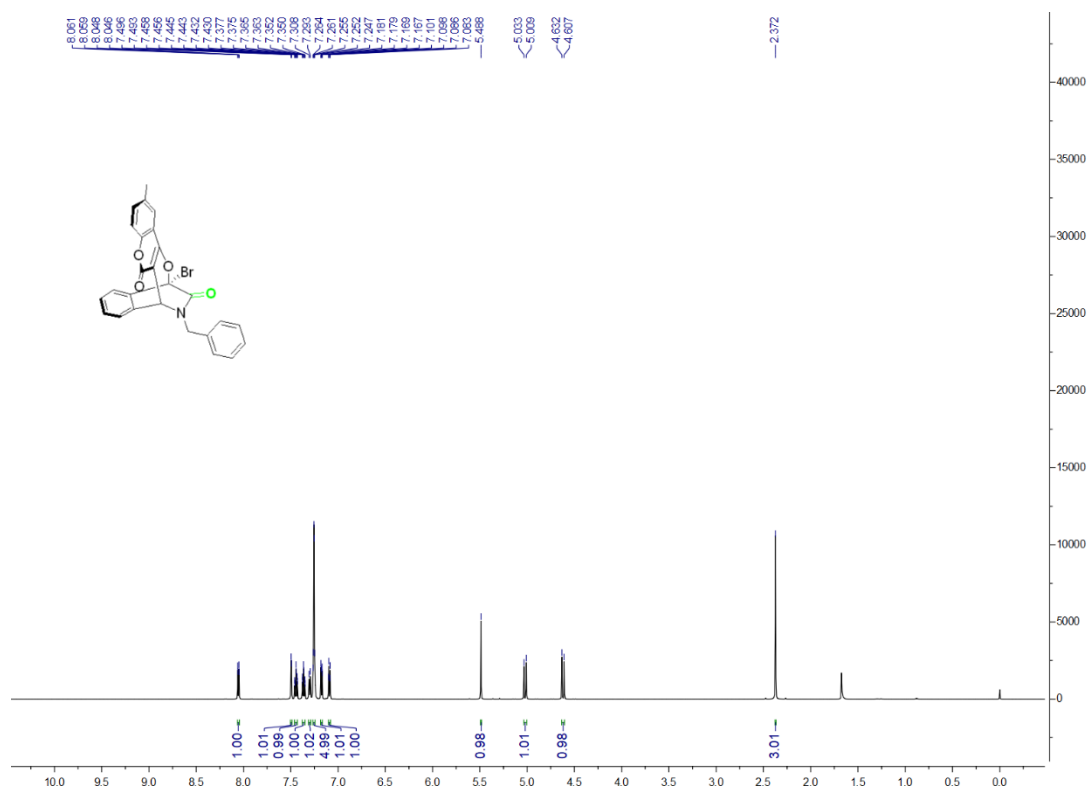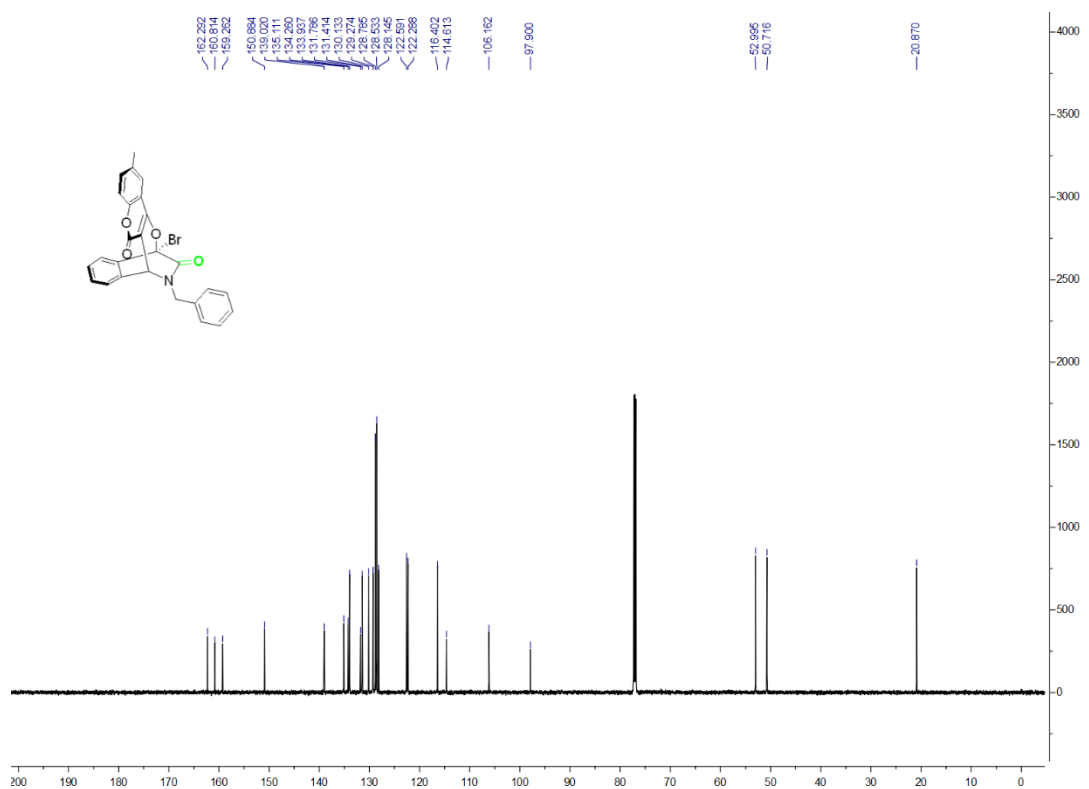

# <sup>1</sup>H NMR and <sup>13</sup>C NMR spectra of compound **3ak**

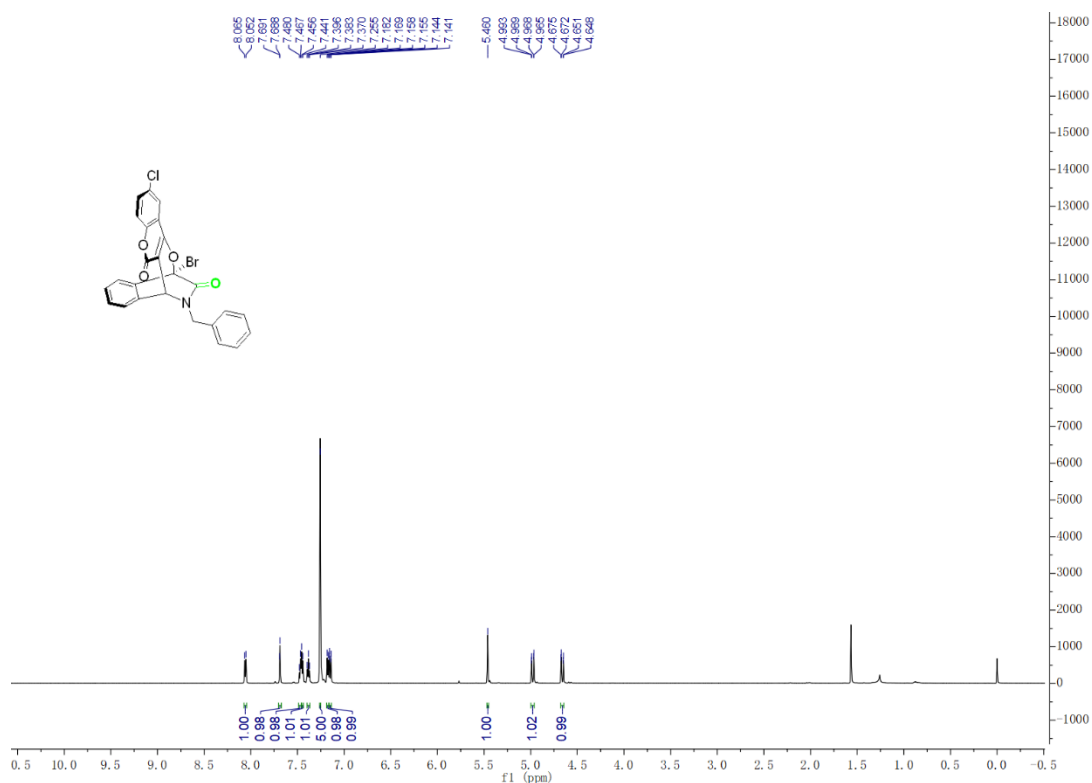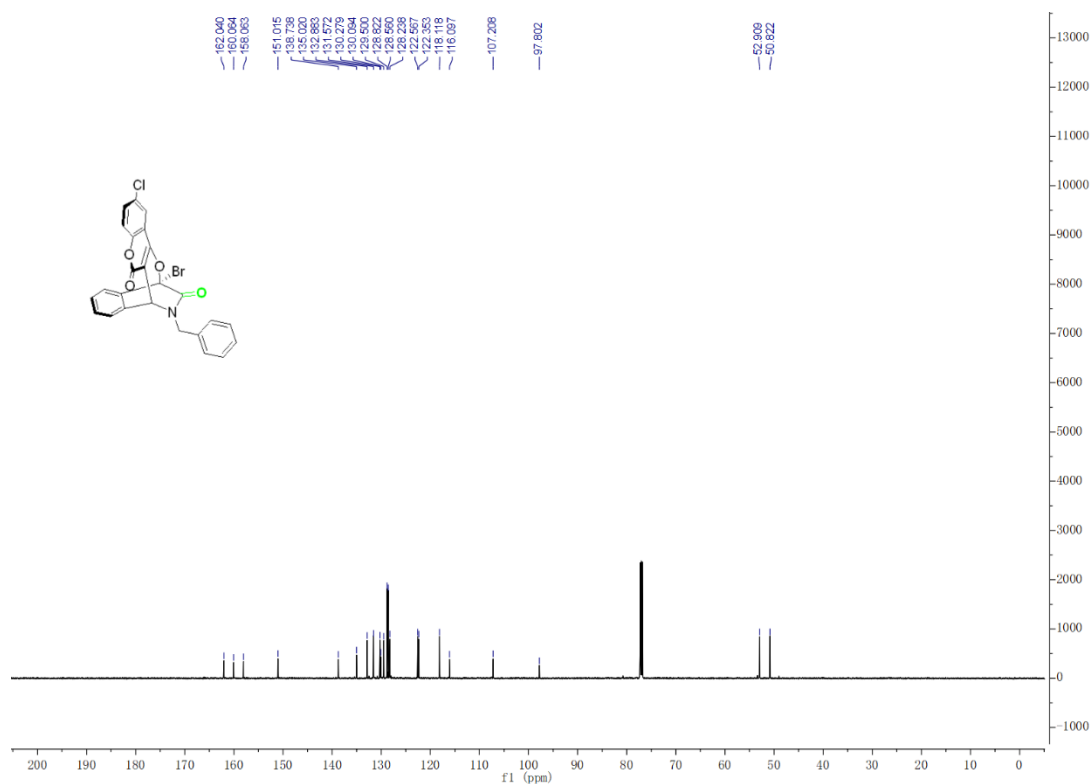

<sup>1</sup>H NMR and <sup>13</sup>C NMR spectra of compound **3al**

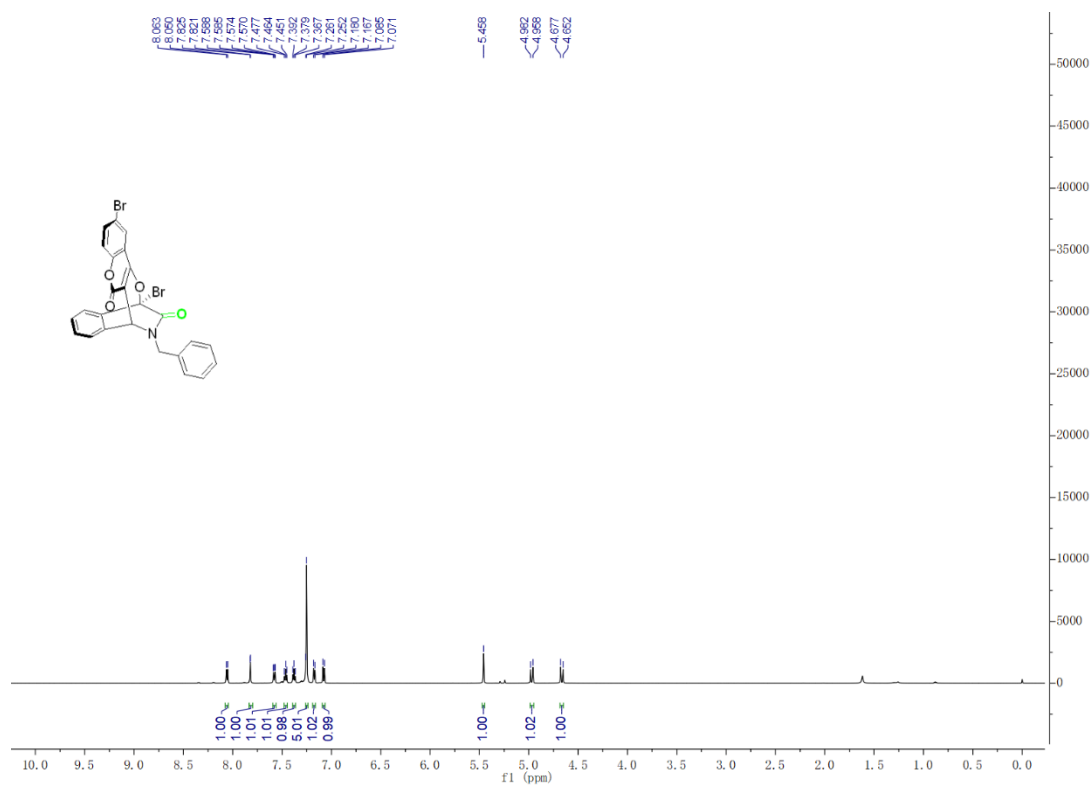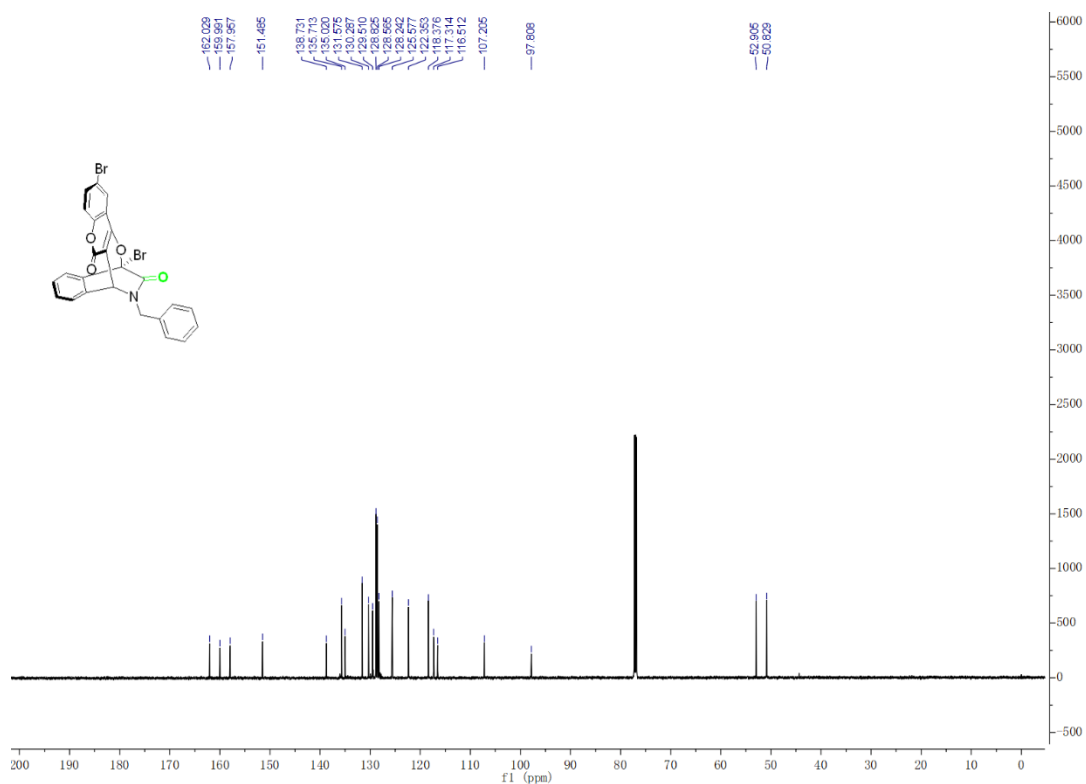

<sup>1</sup>H NMR and <sup>13</sup>C NMR spectra of compound **3am**

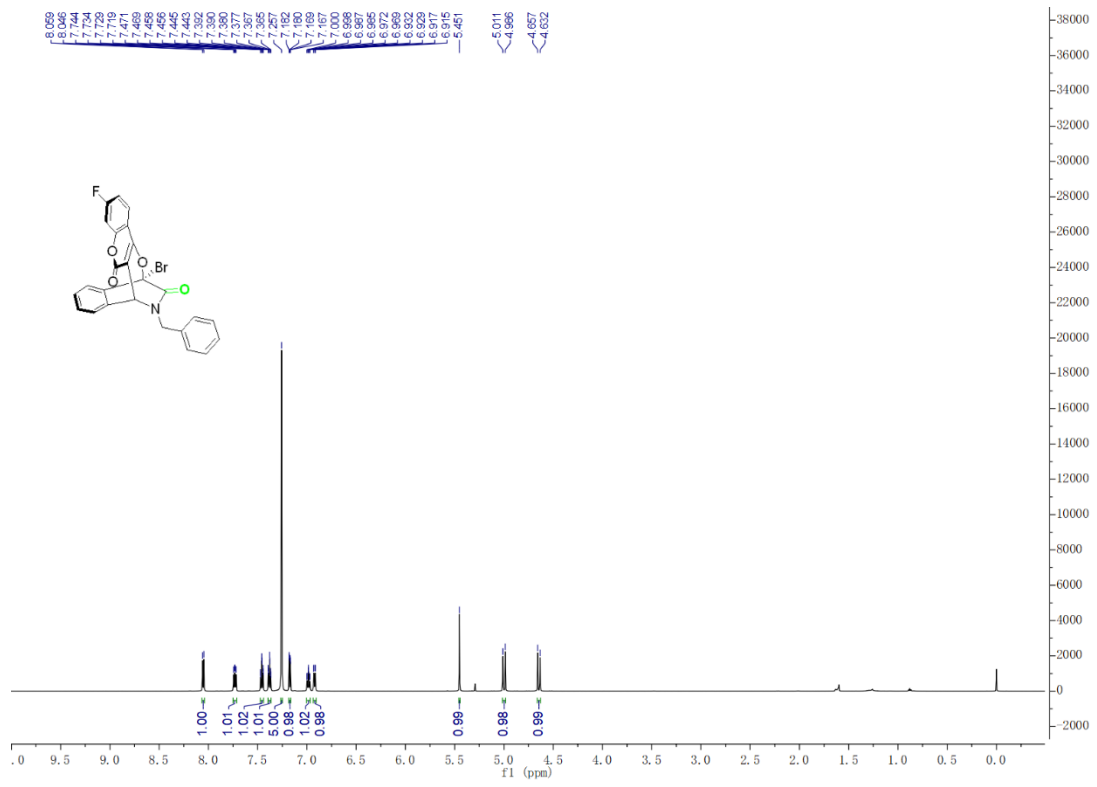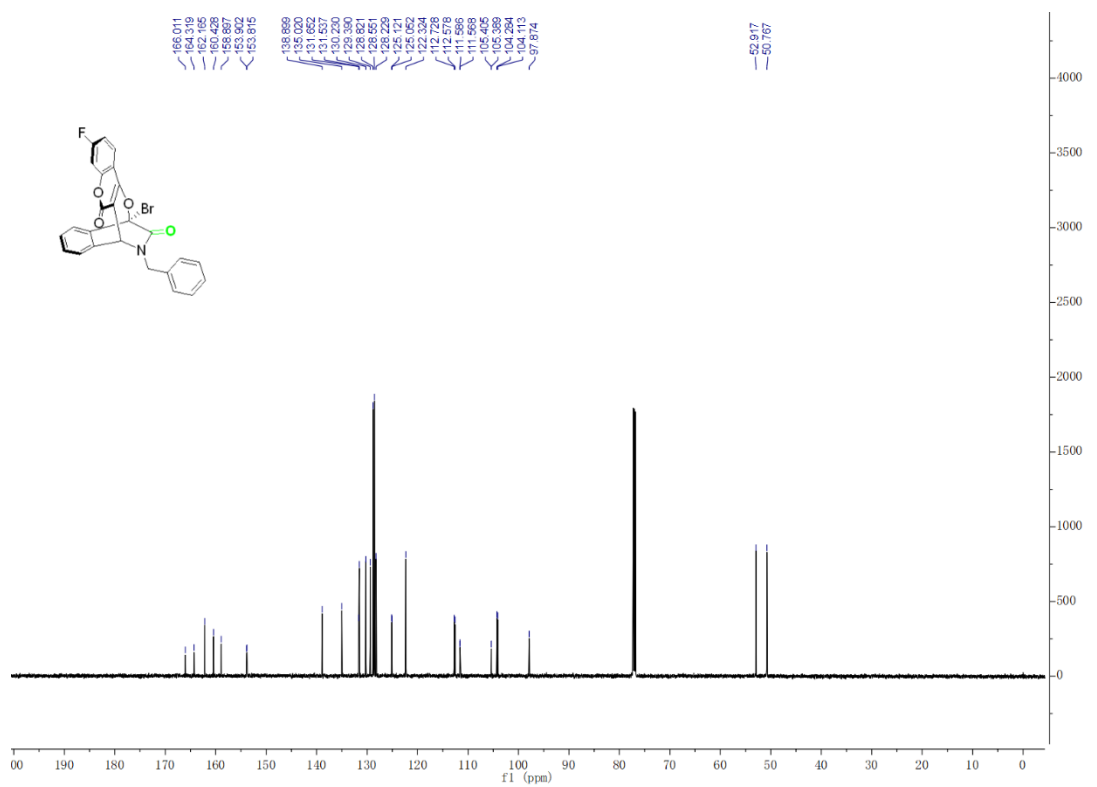

<sup>1</sup>H NMR and <sup>13</sup>C NMR spectra of compound **3an**

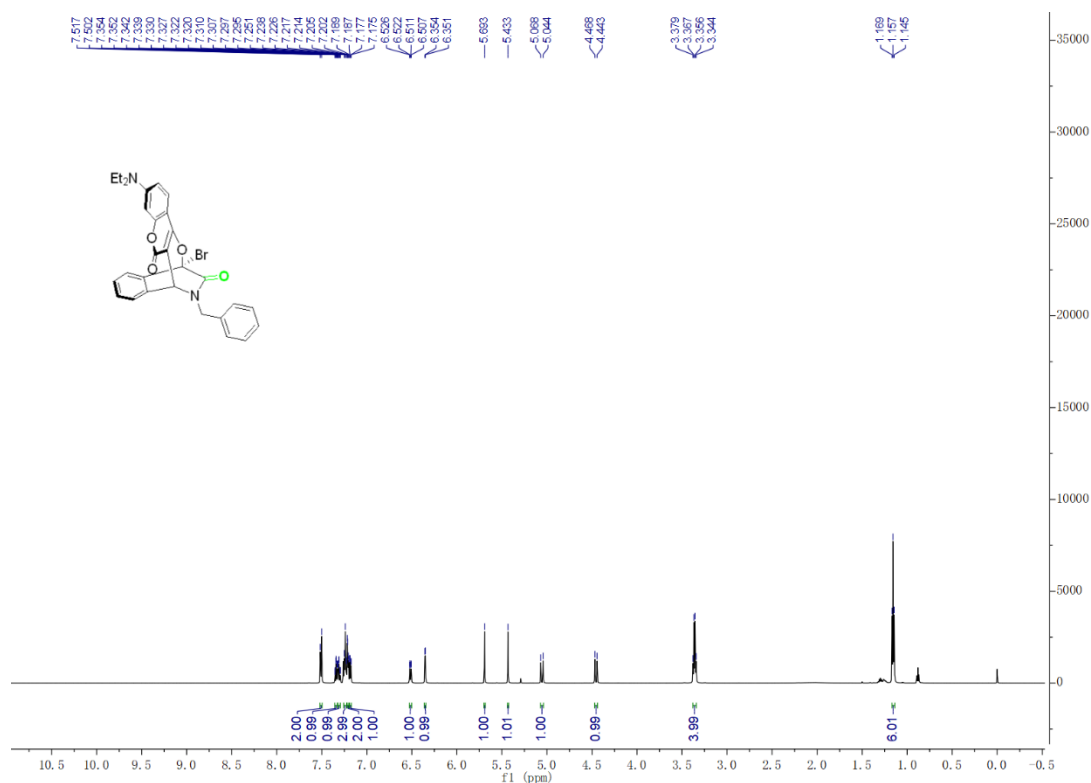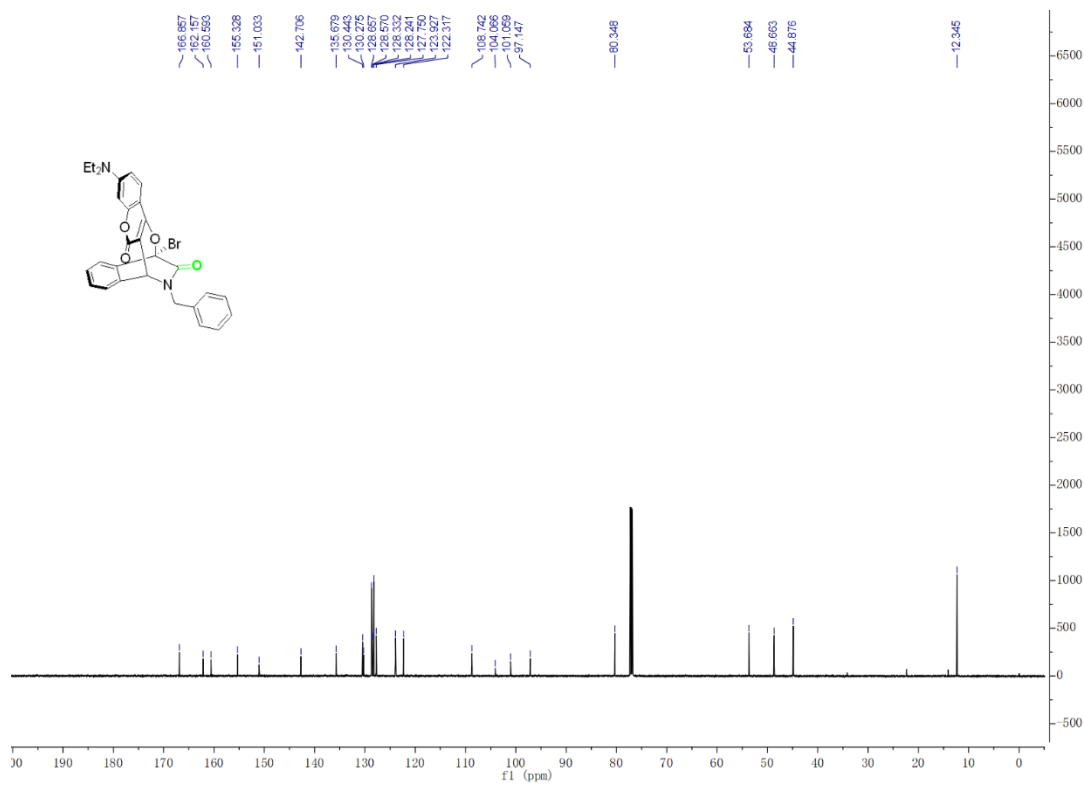



<sup>1</sup>H NMR and <sup>13</sup>C NMR spectra of compound **3ao**

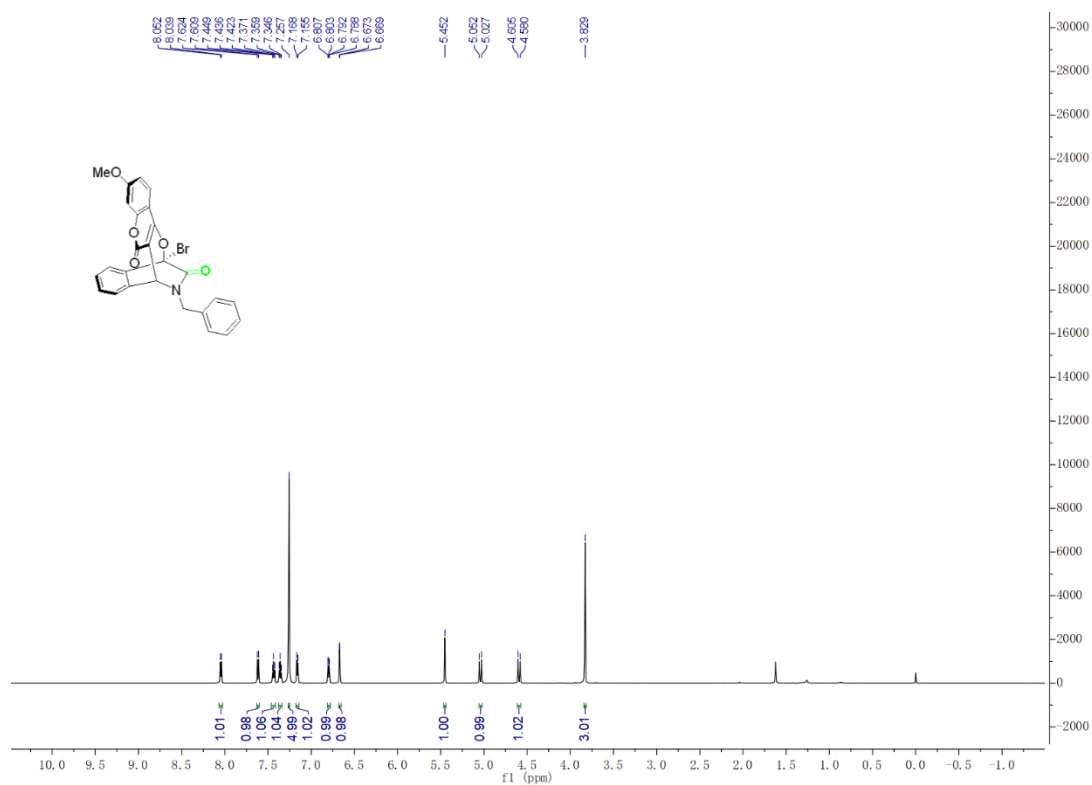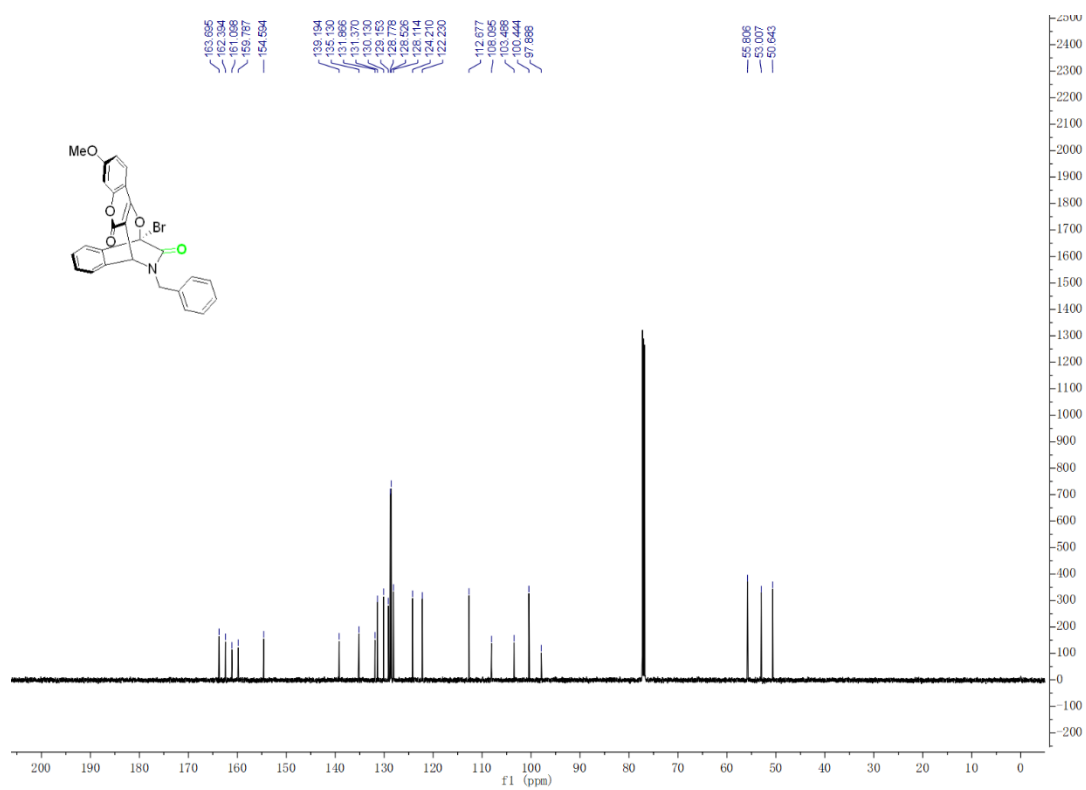

# <sup>1</sup>H NMR and <sup>13</sup>C NMR spectra of compound **3ap**

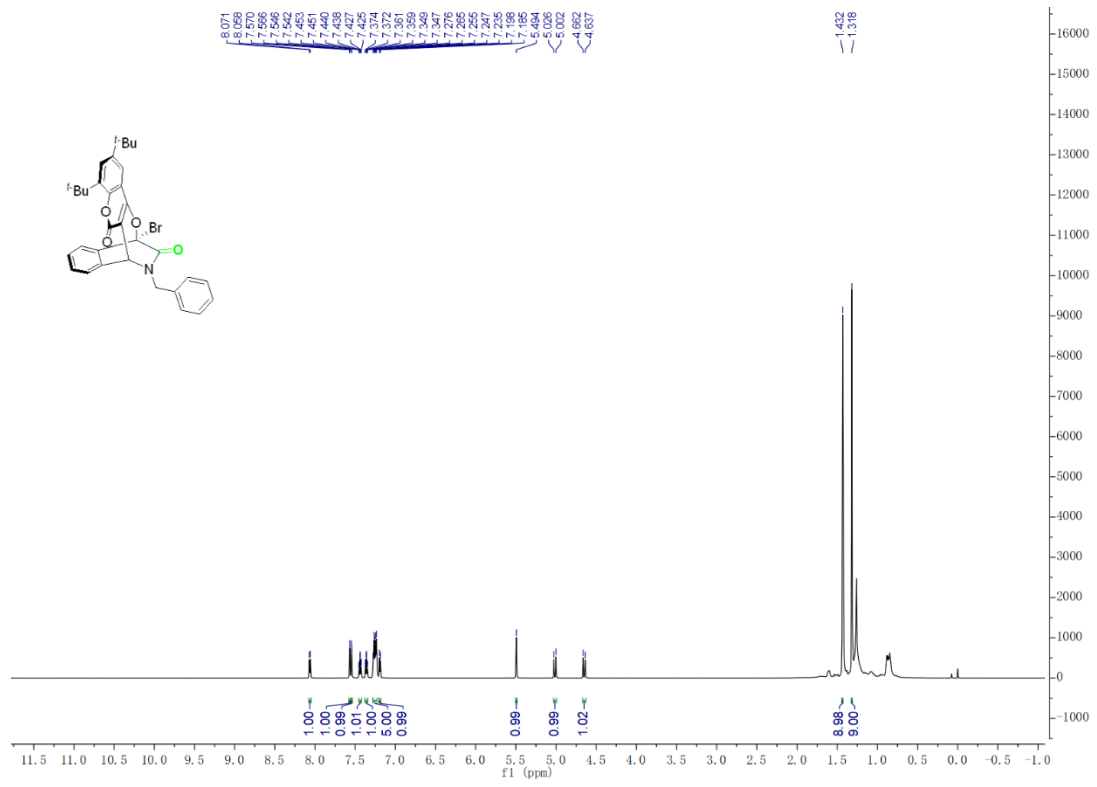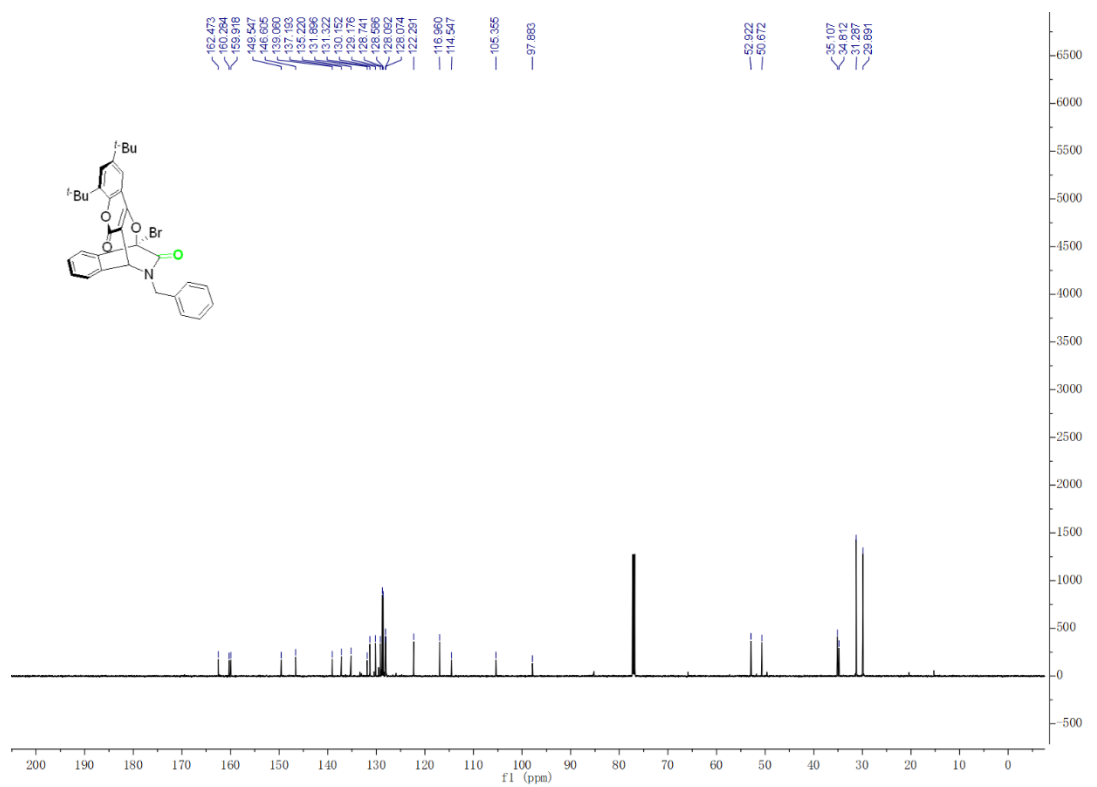

# <sup>1</sup>H NMR and <sup>13</sup>C NMR spectra of compound 4a

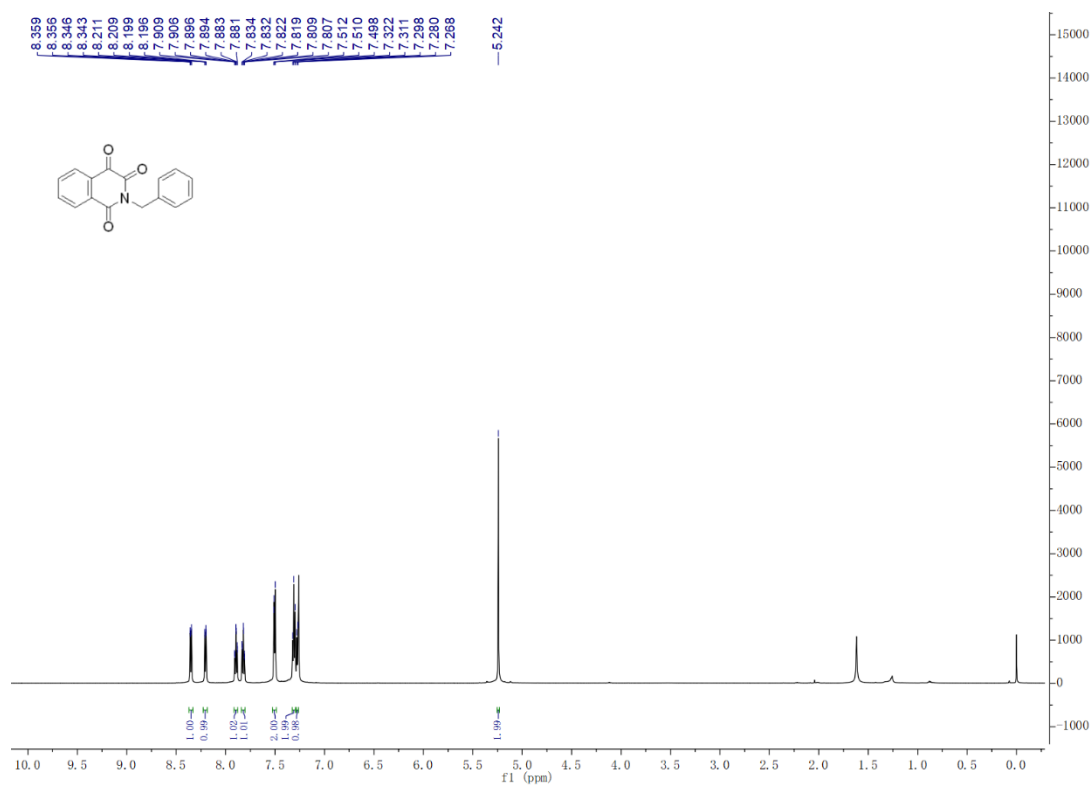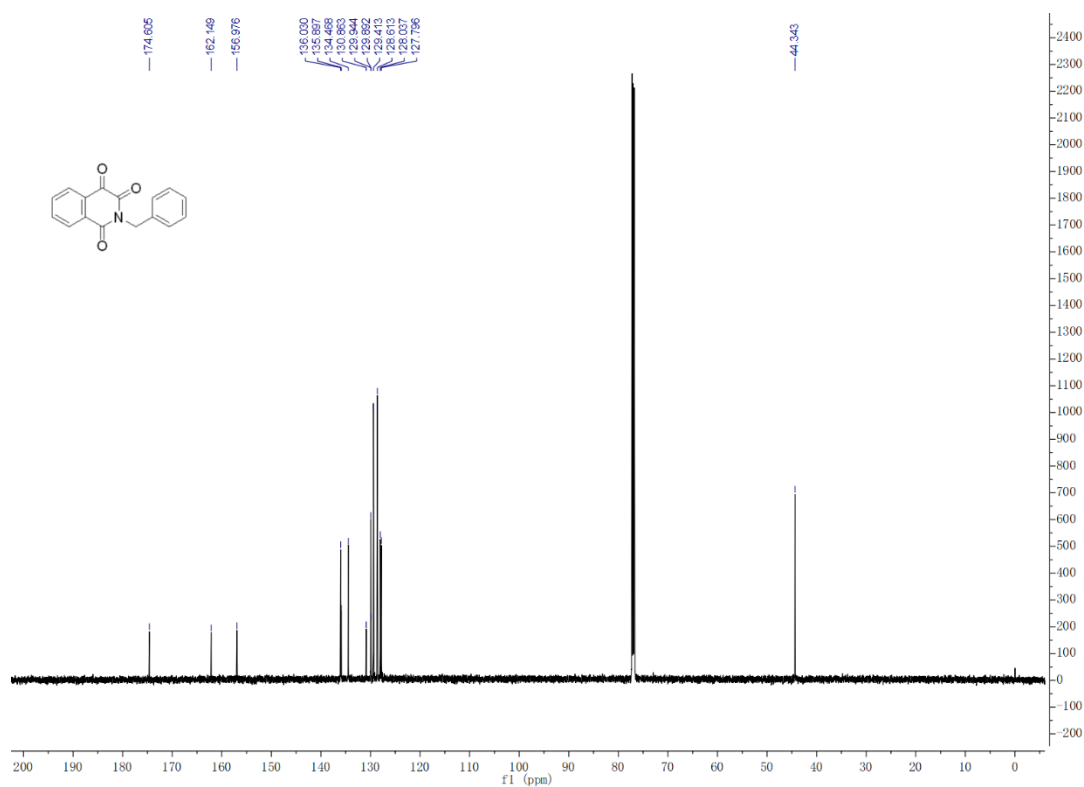

# <sup>1</sup>H NMR and <sup>13</sup>C NMR spectra of compound 4b

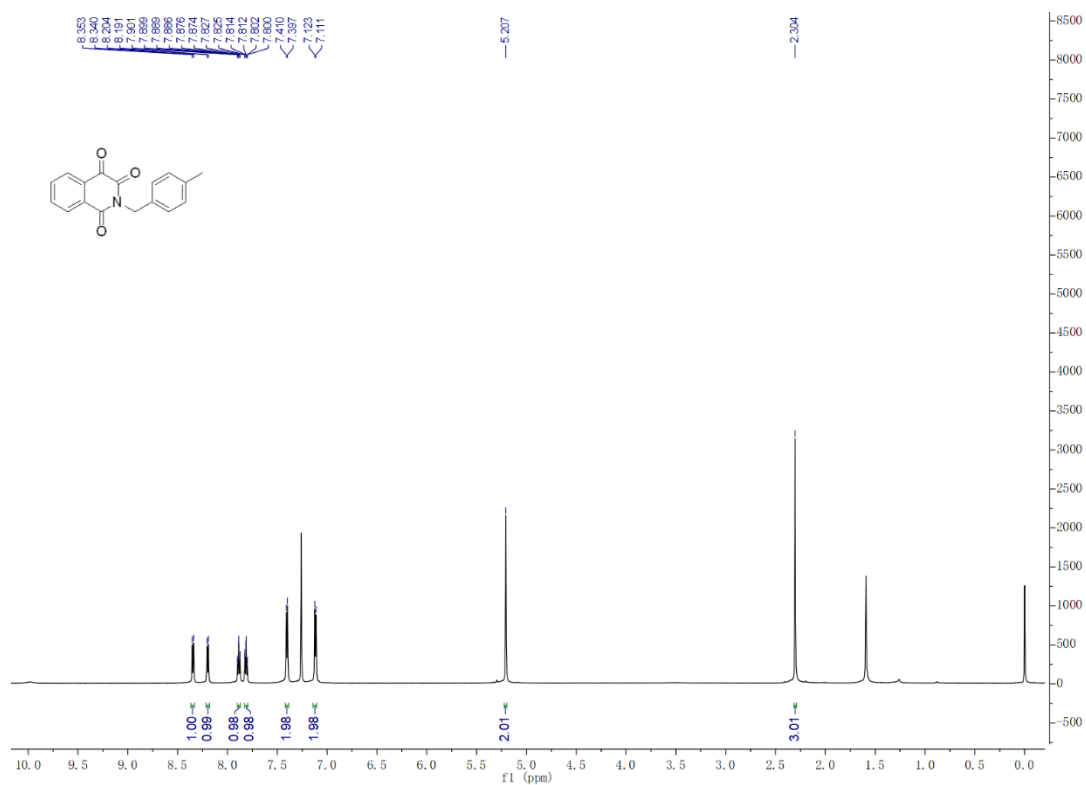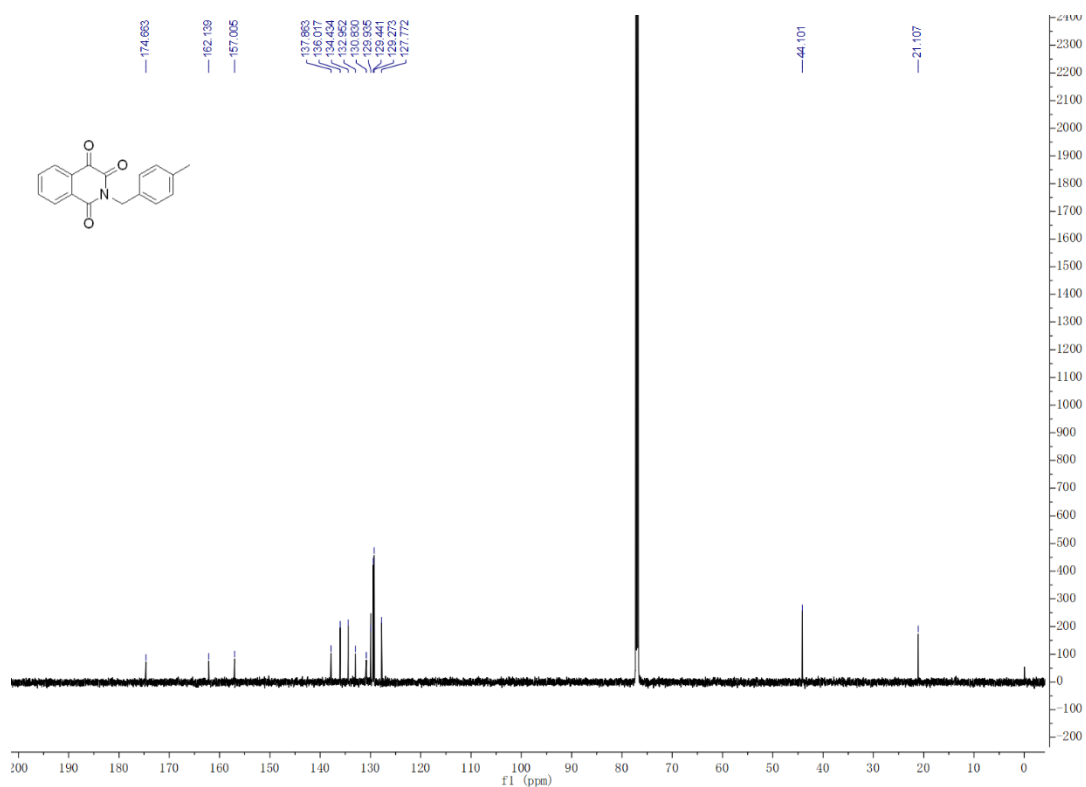

# <sup>1</sup>H NMR and <sup>13</sup>C NMR spectra of compound 4c

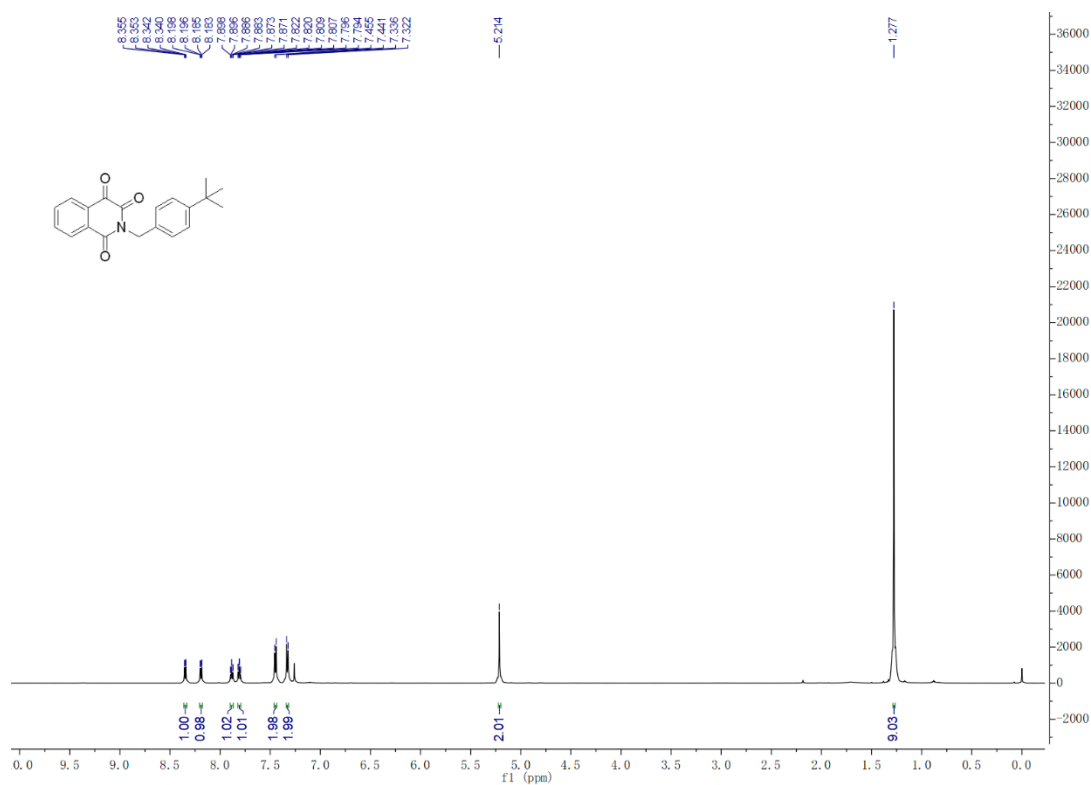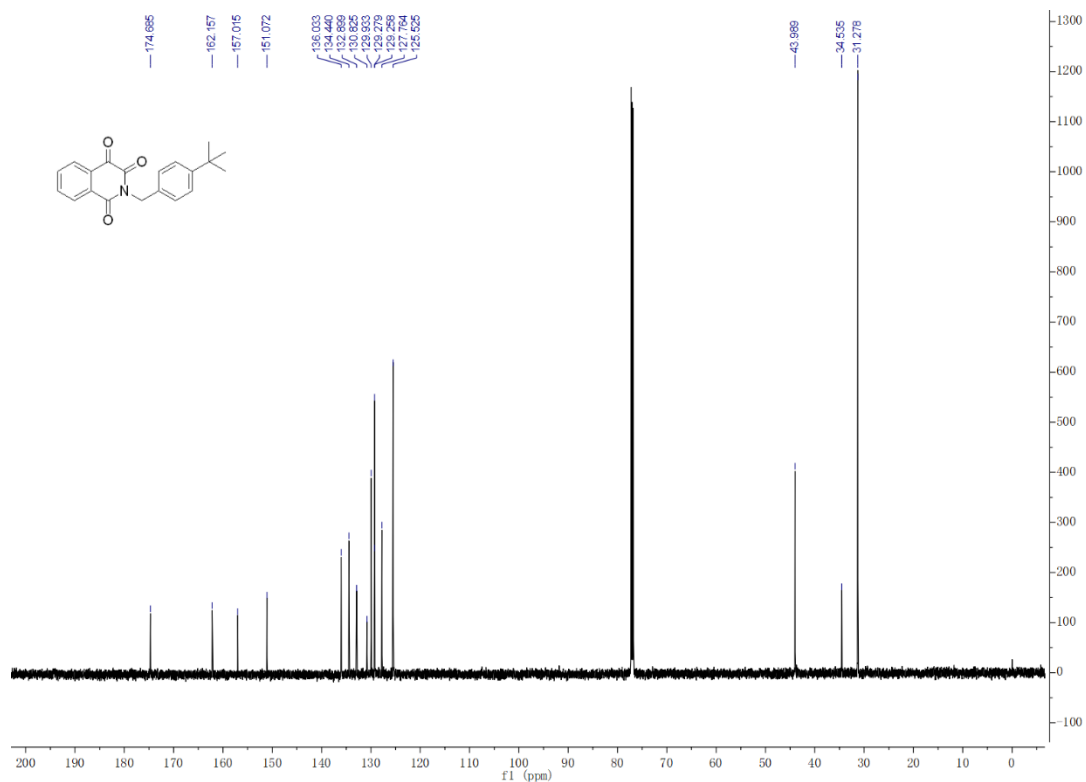

# <sup>1</sup>H NMR and <sup>13</sup>C NMR spectra of compound 4d

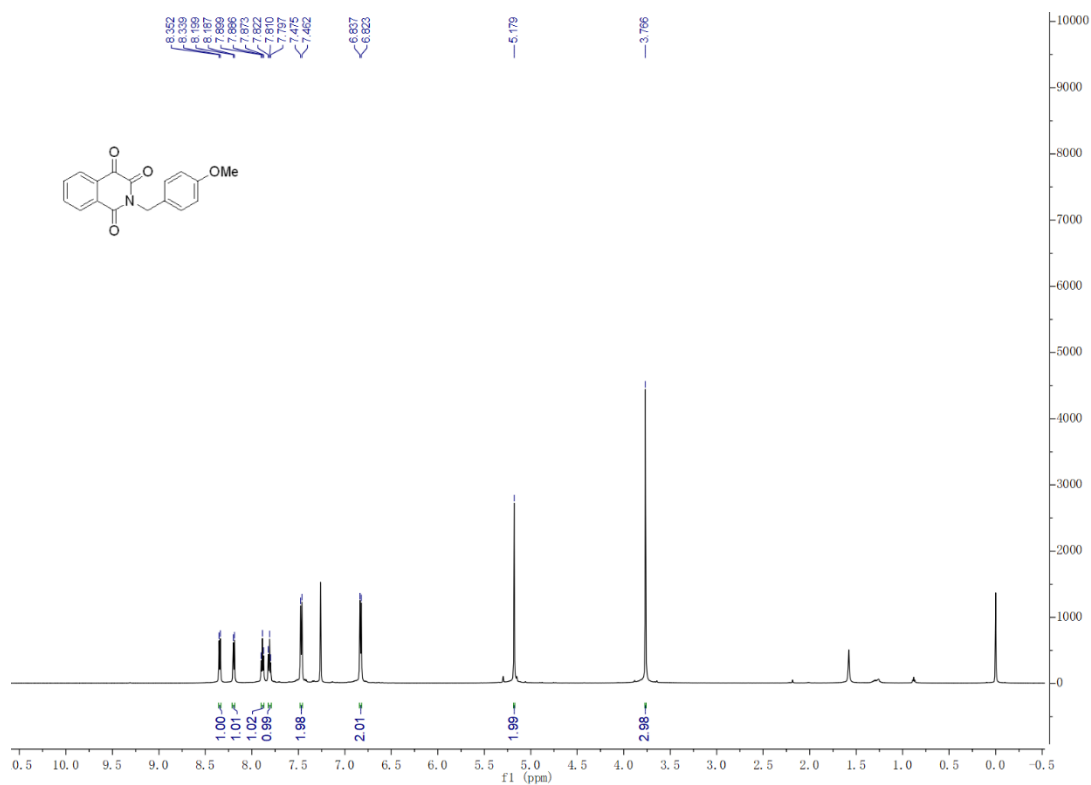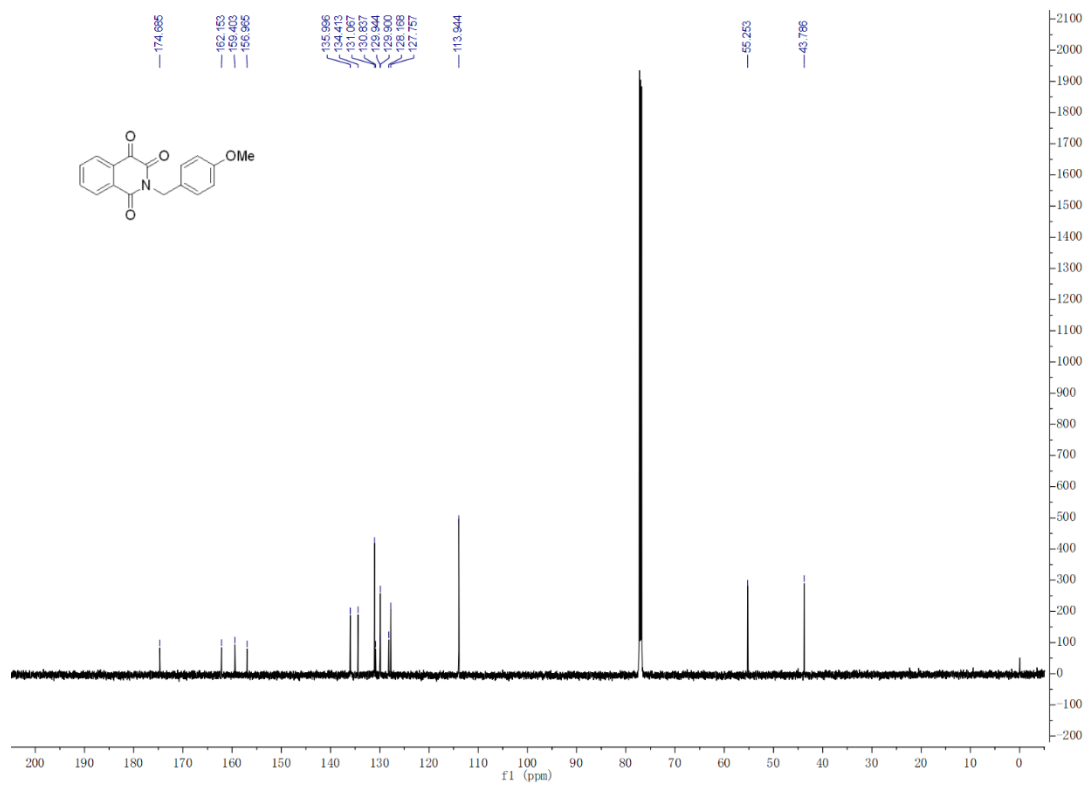

# <sup>1</sup>H NMR and <sup>13</sup>C NMR spectra of compound 4e

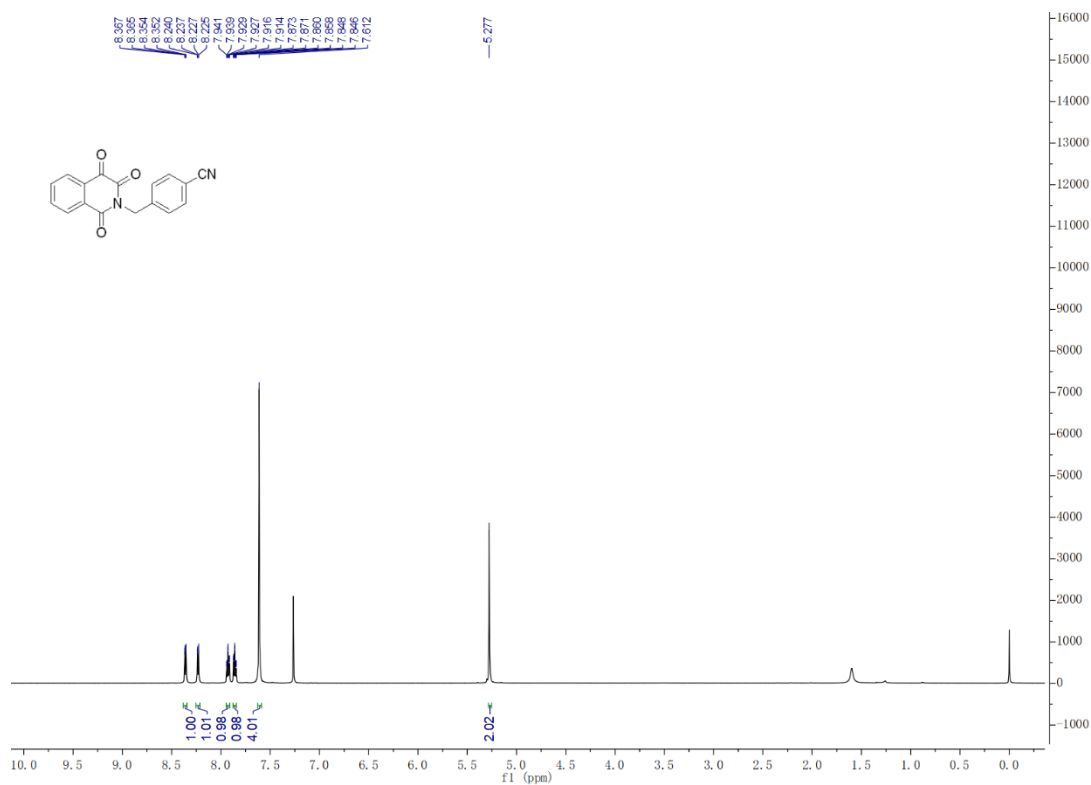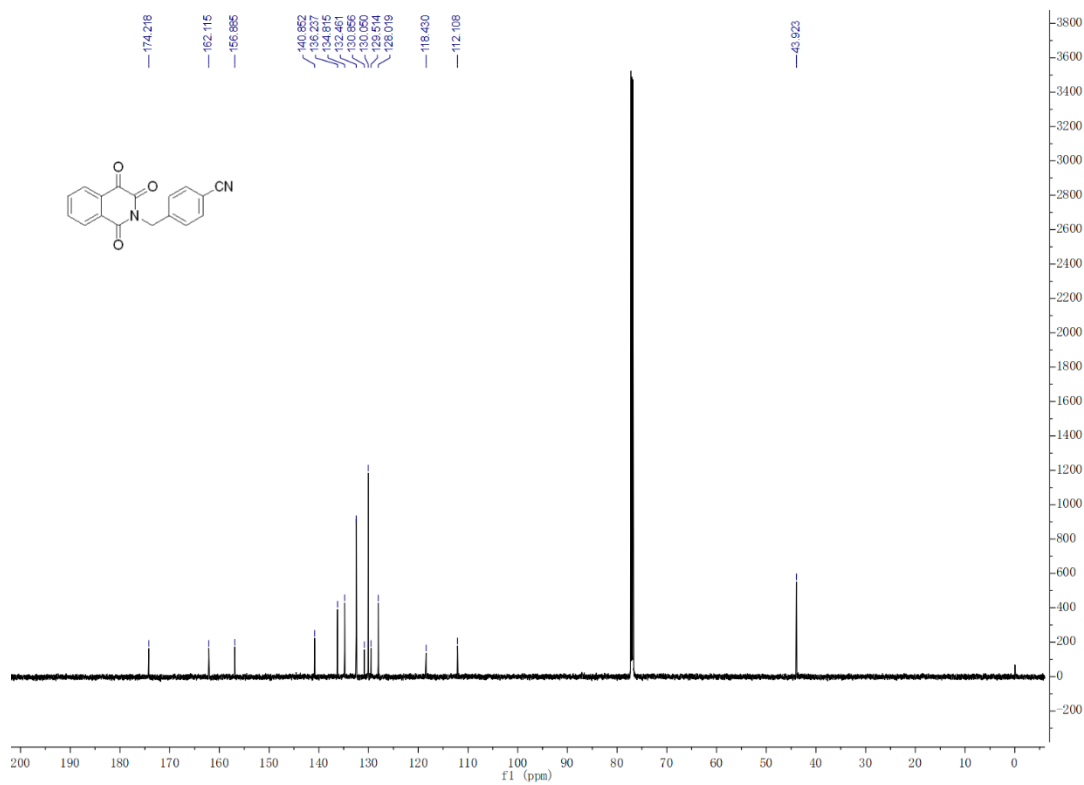

# <sup>1</sup>H NMR and <sup>13</sup>C NMR spectra of compound 4f

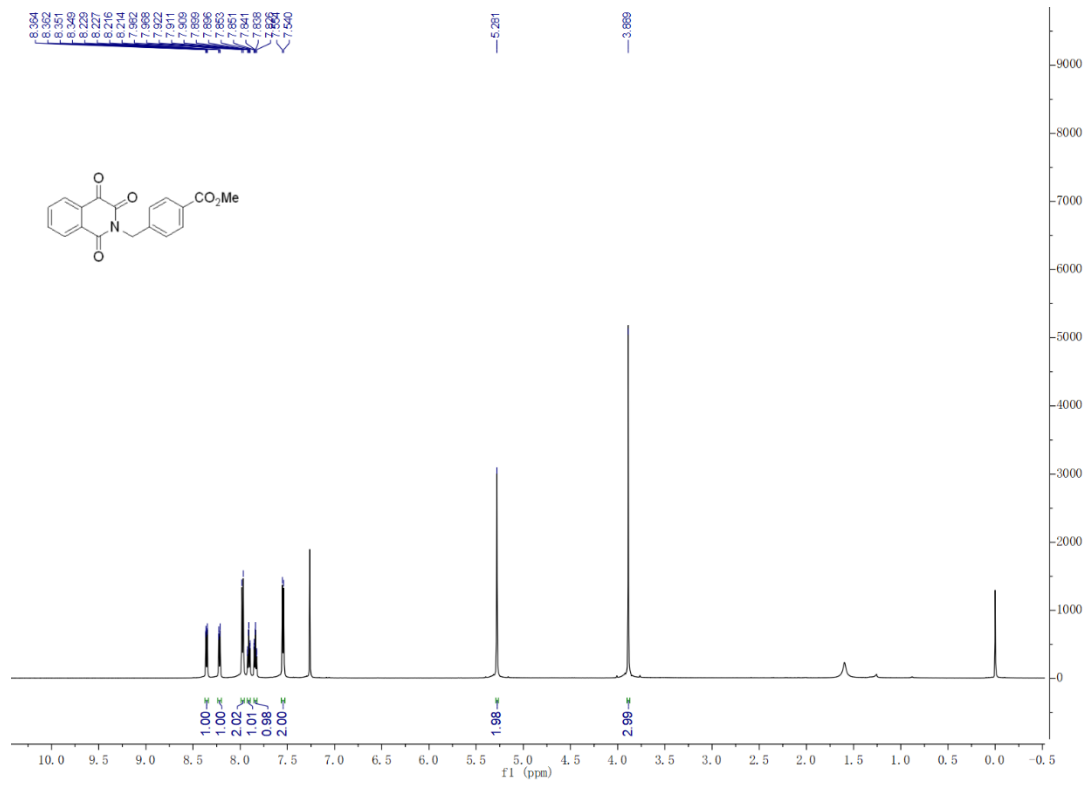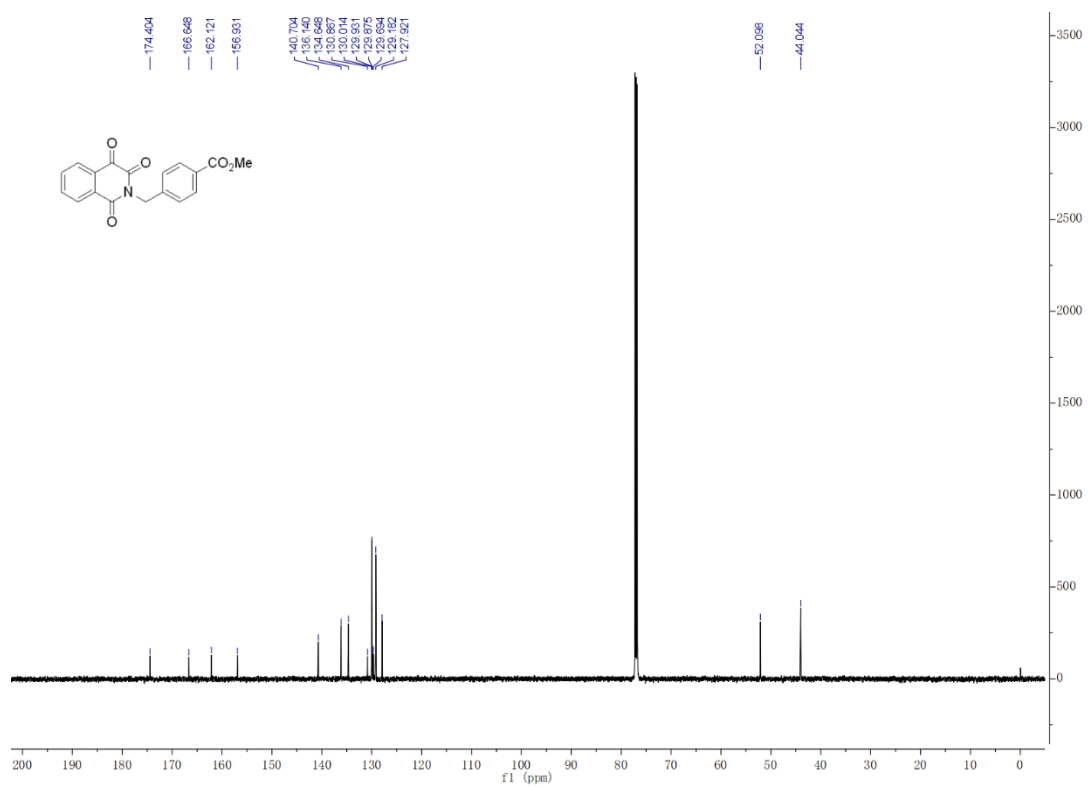



# <sup>1</sup>H NMR and <sup>13</sup>C NMR spectra of compound 4g

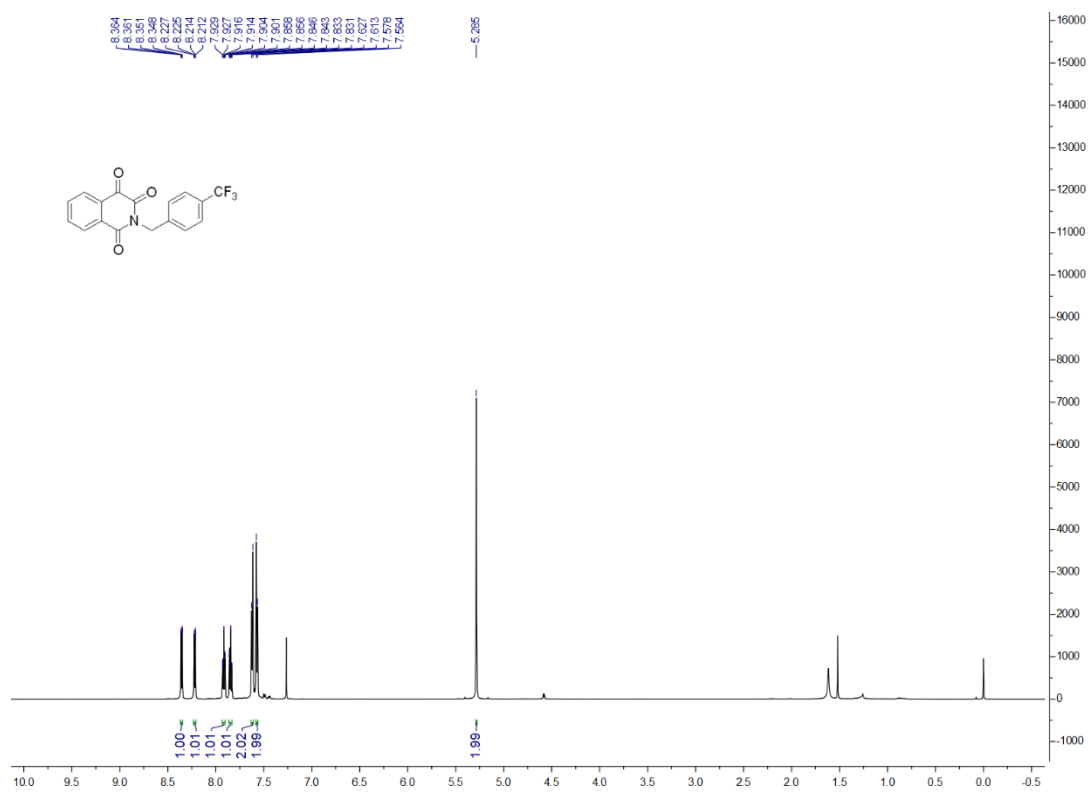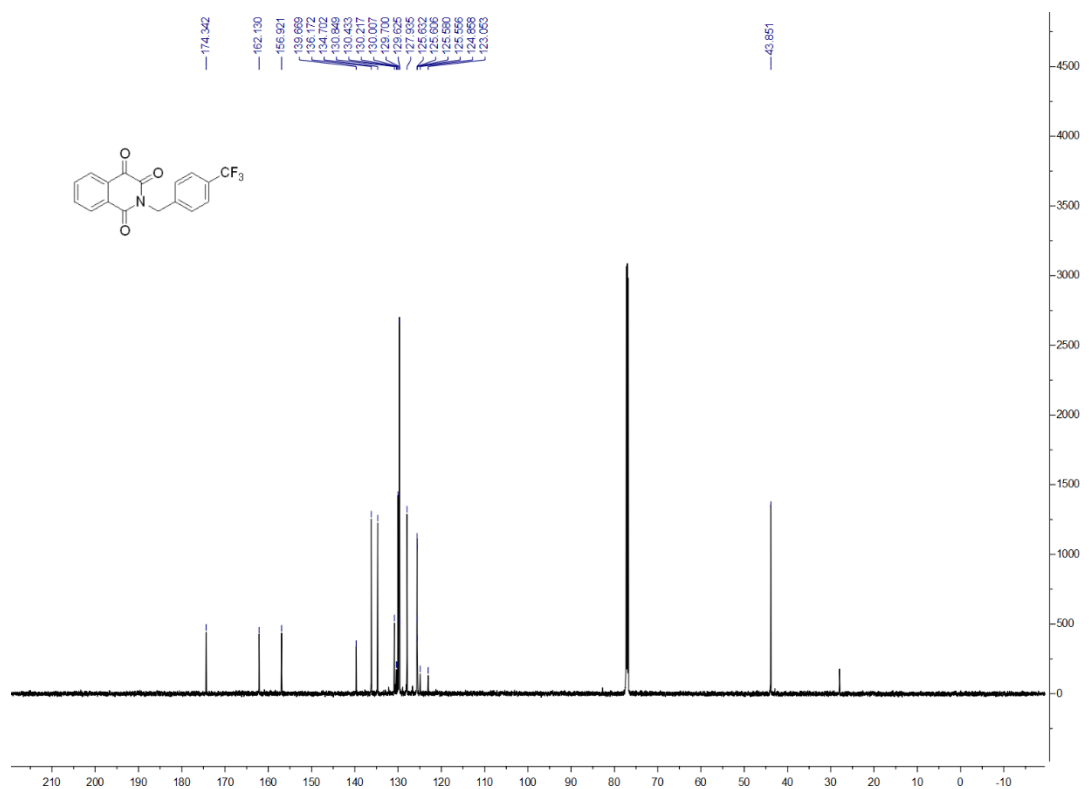

# <sup>1</sup>H NMR and <sup>13</sup>C NMR spectra of compound 4h

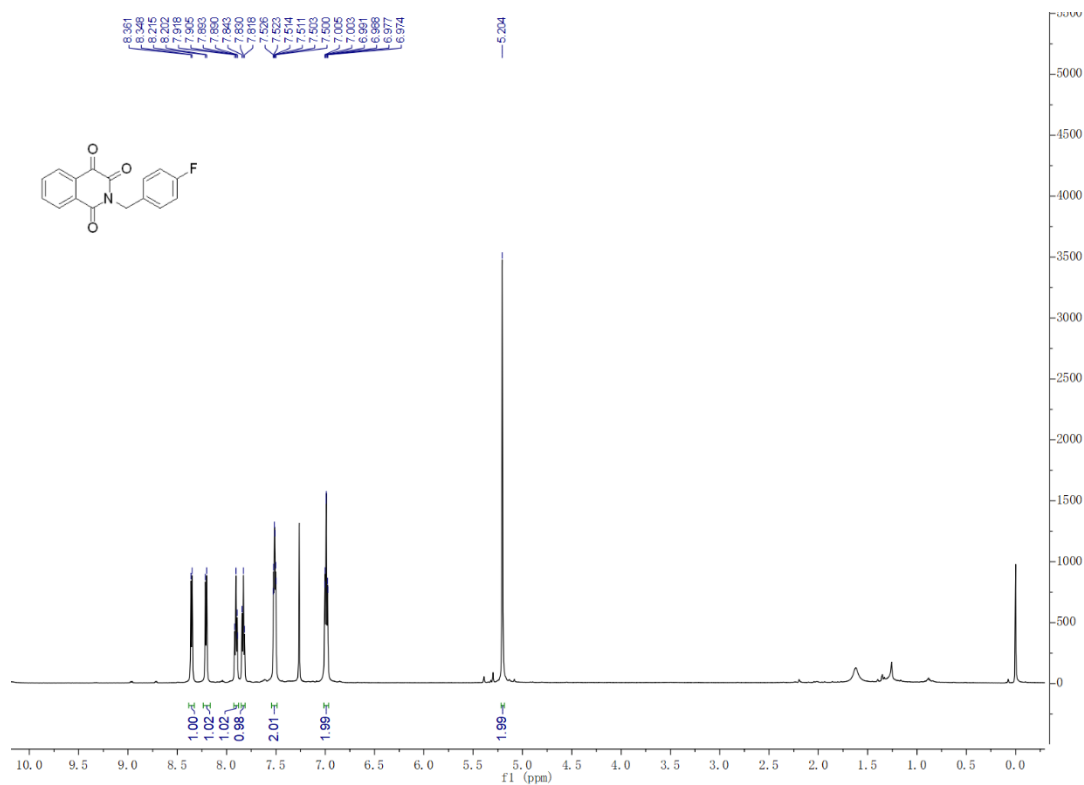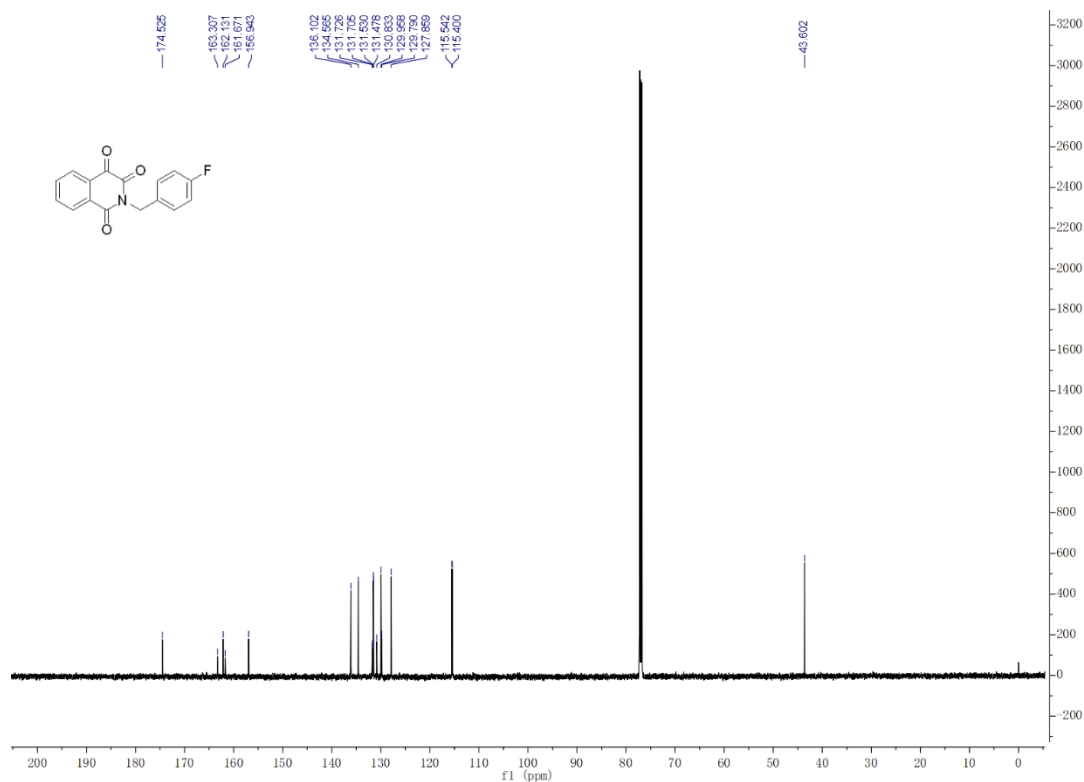

# <sup>1</sup>H NMR and <sup>13</sup>C NMR spectra of compound 4i

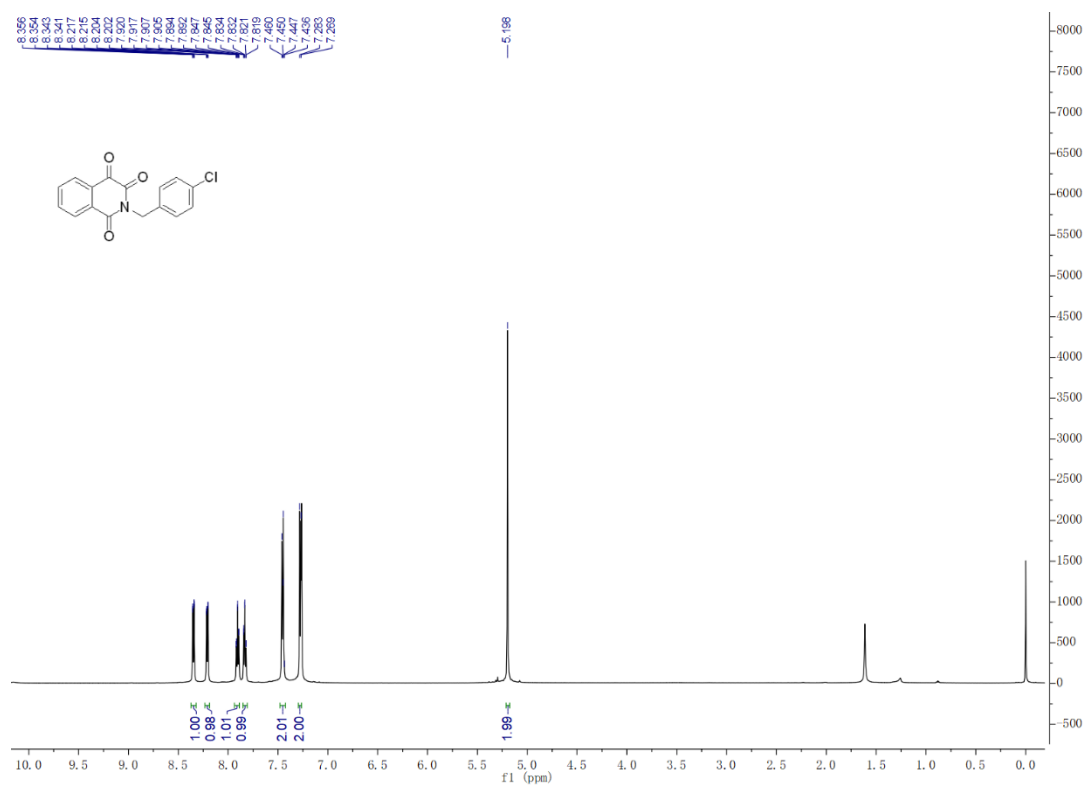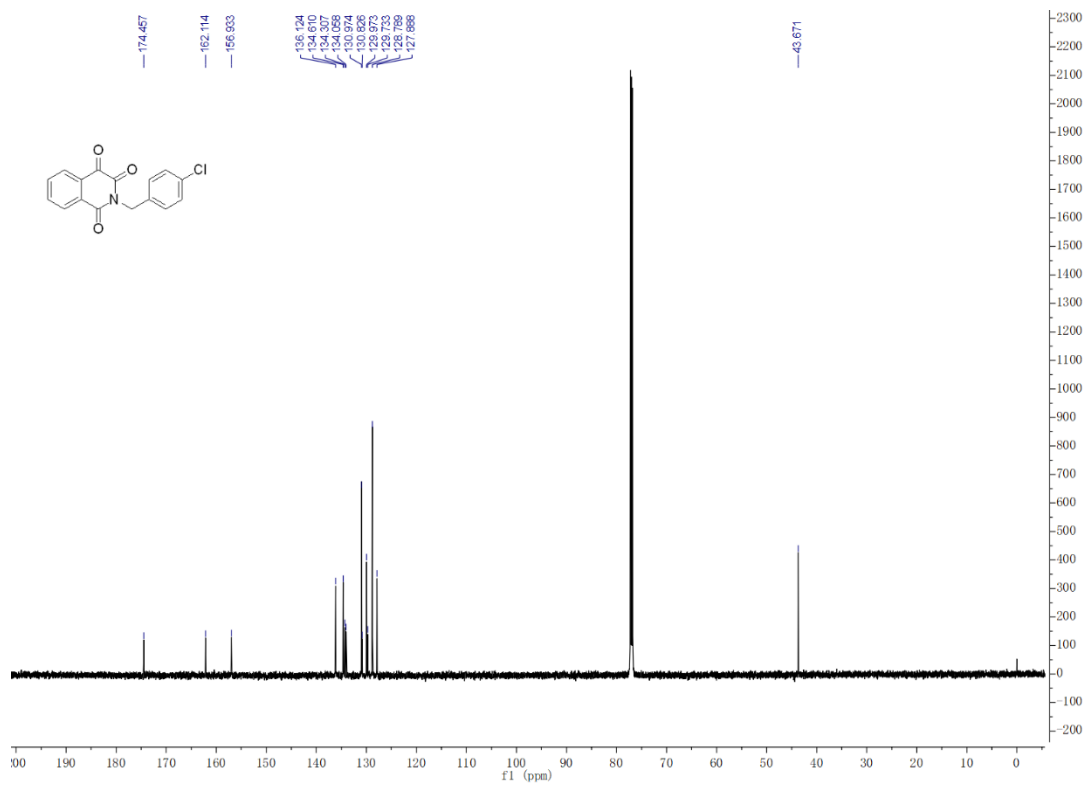

<sup>1</sup>H NMR and <sup>13</sup>C NMR spectra of compound **4j**

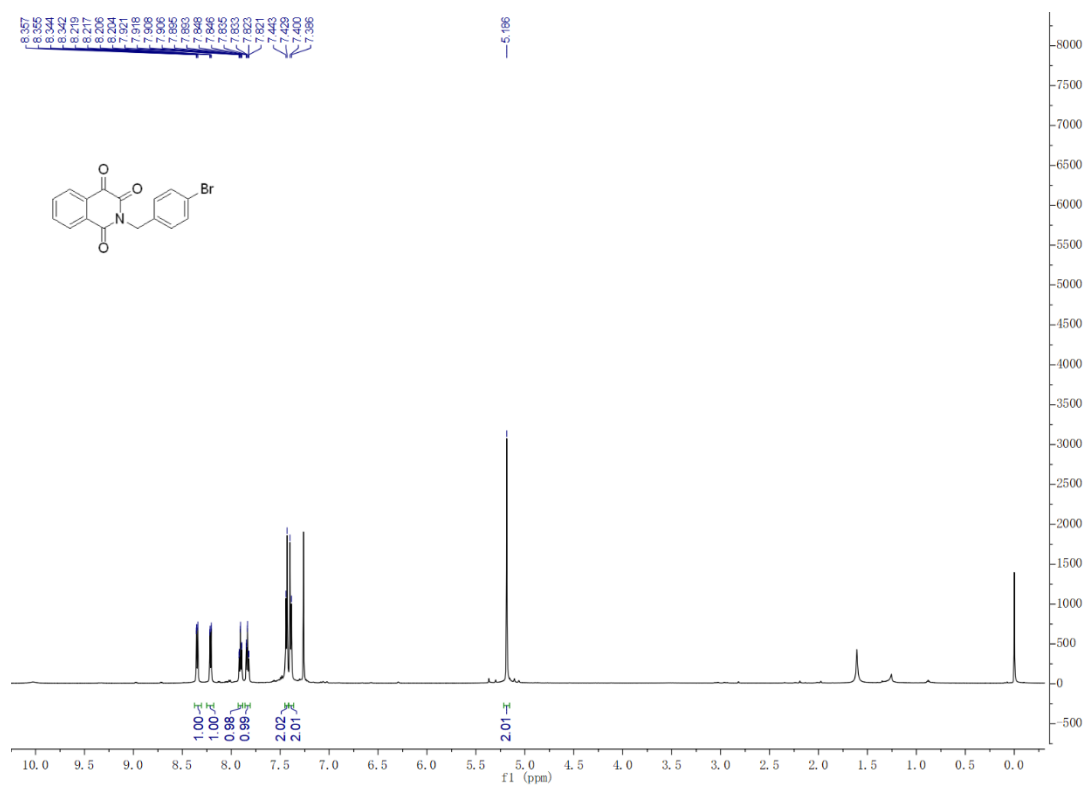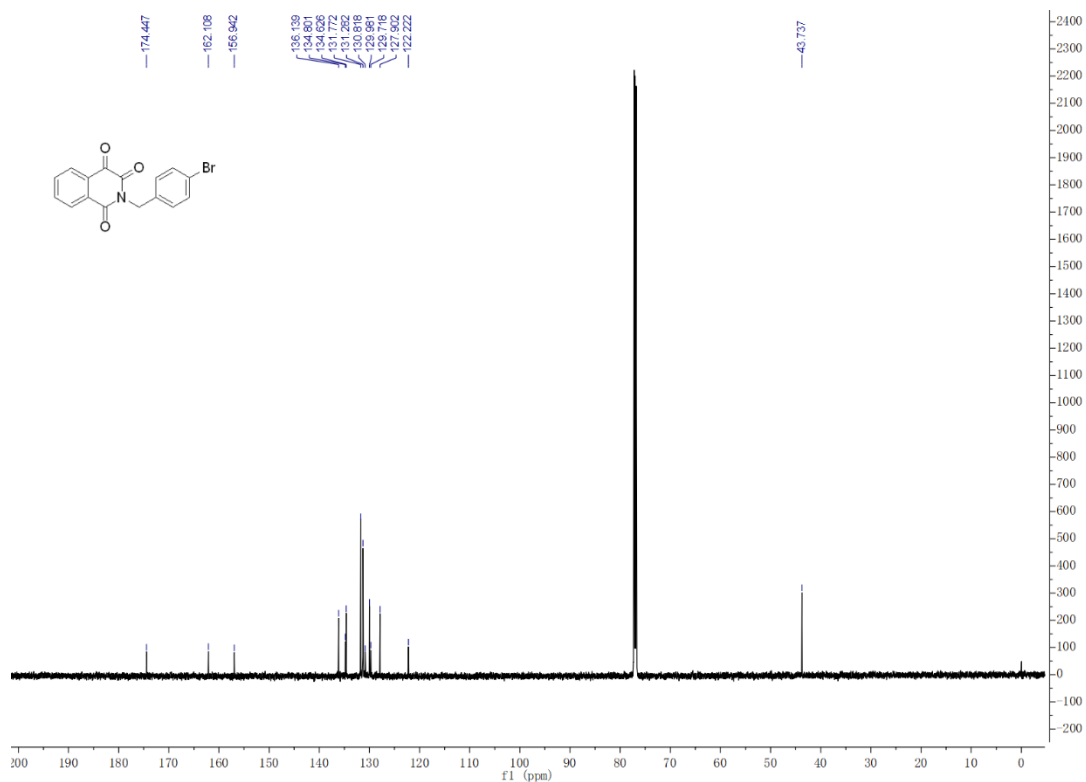

# <sup>1</sup>H NMR and <sup>13</sup>C NMR spectra of compound 4k

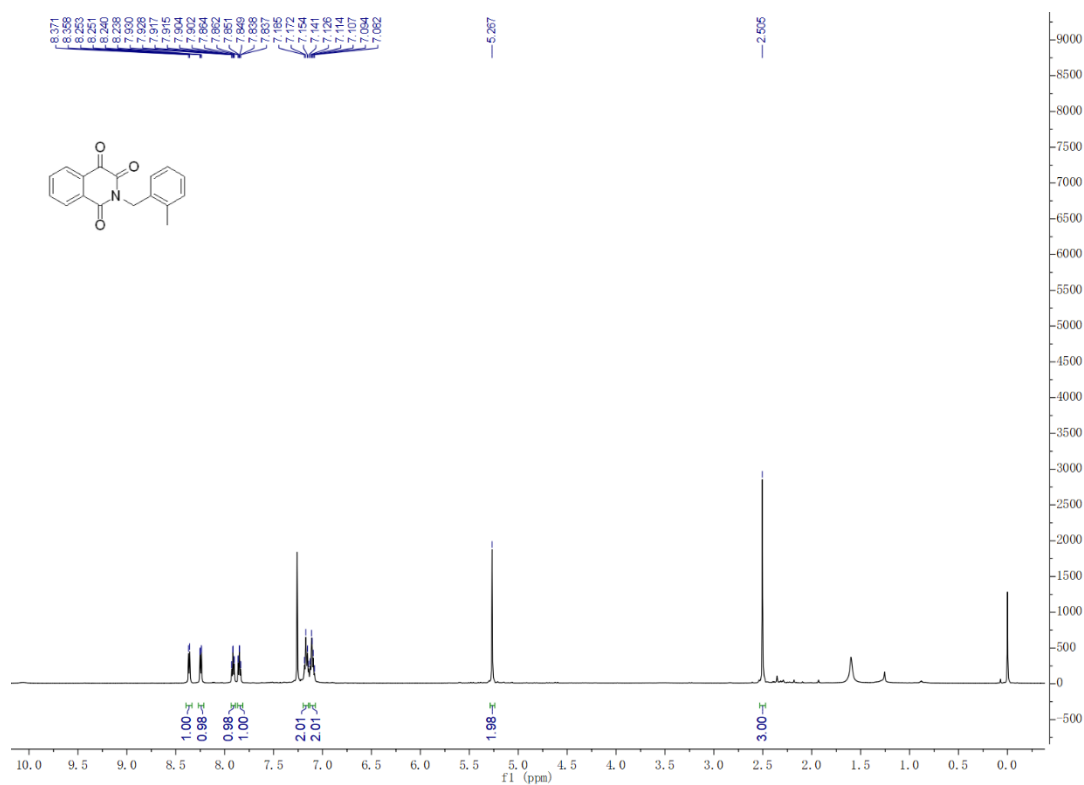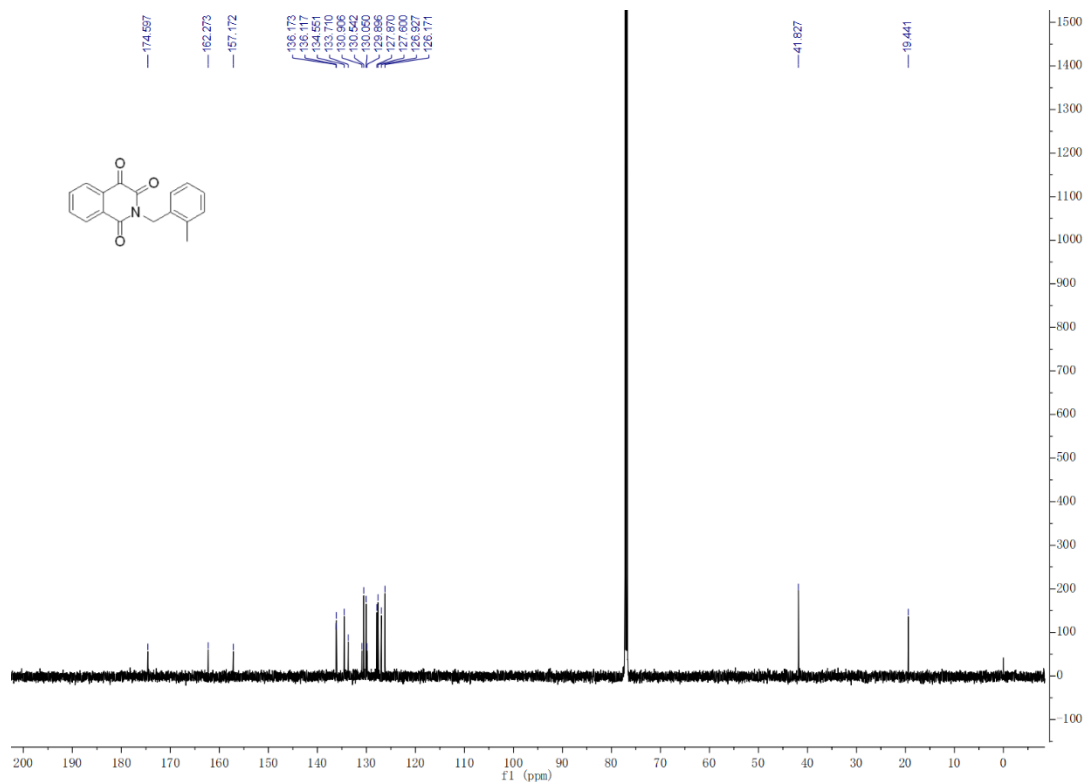

<sup>1</sup>H NMR and <sup>13</sup>C NMR spectra of compound **4I**

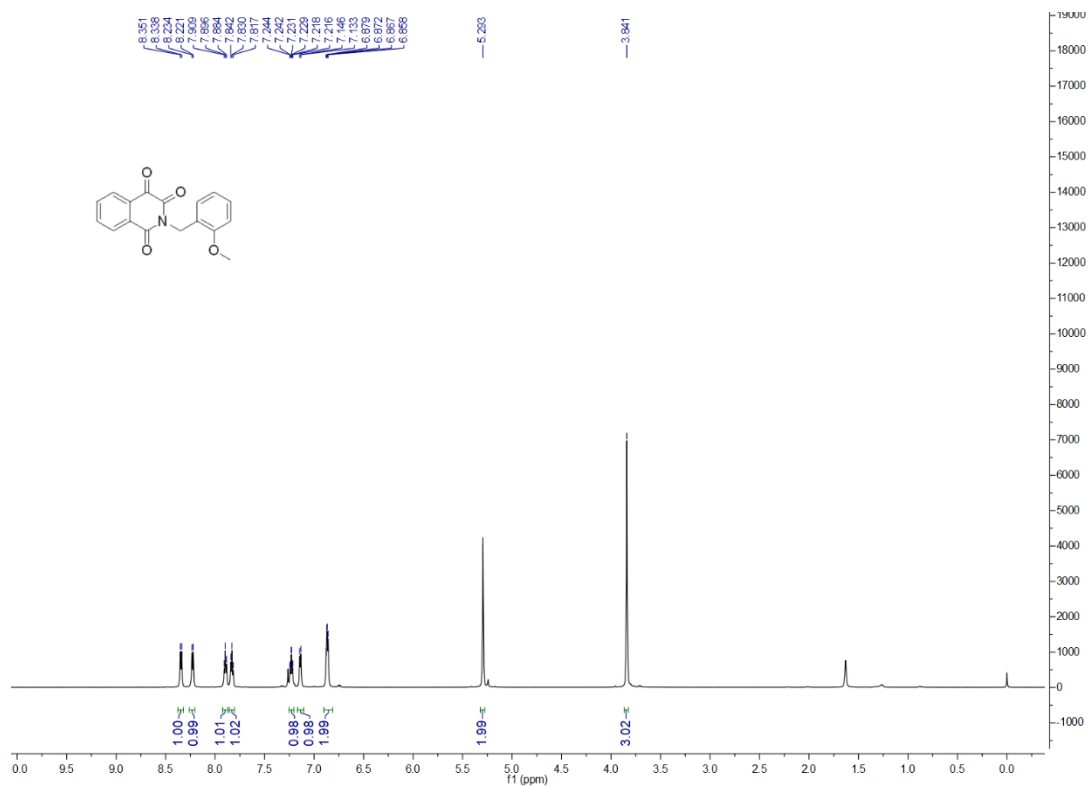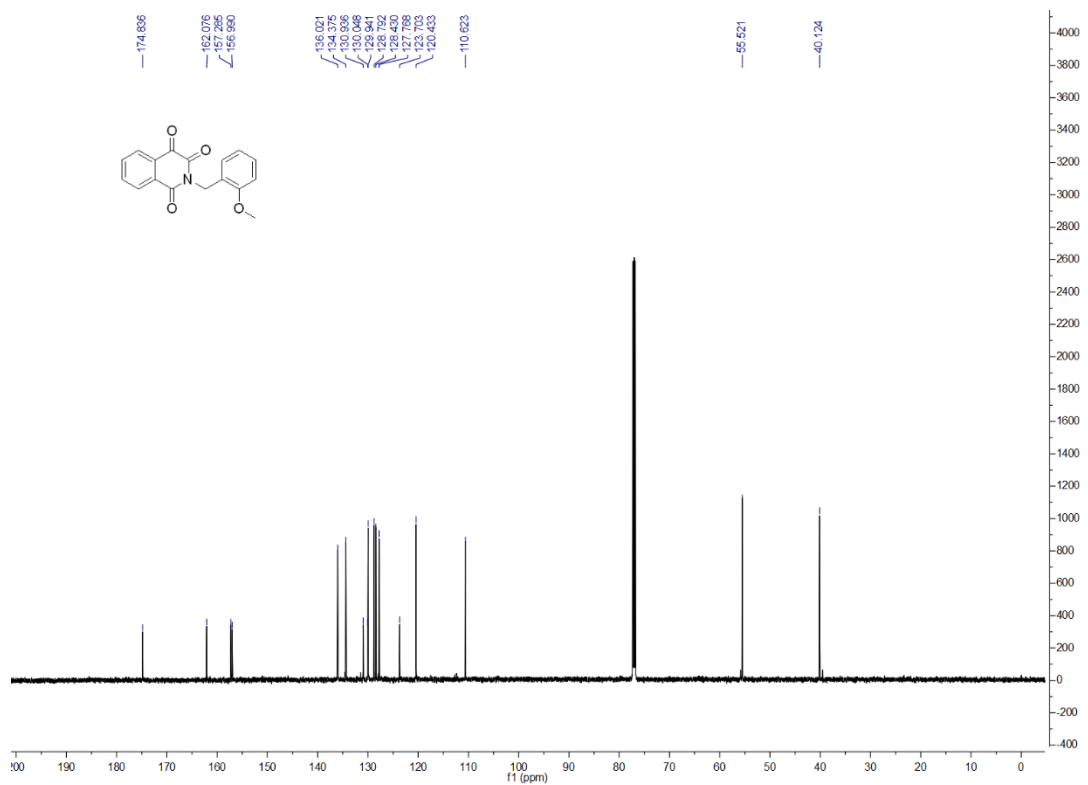

# <sup>1</sup>H NMR and <sup>13</sup>C NMR spectra of compound 4m

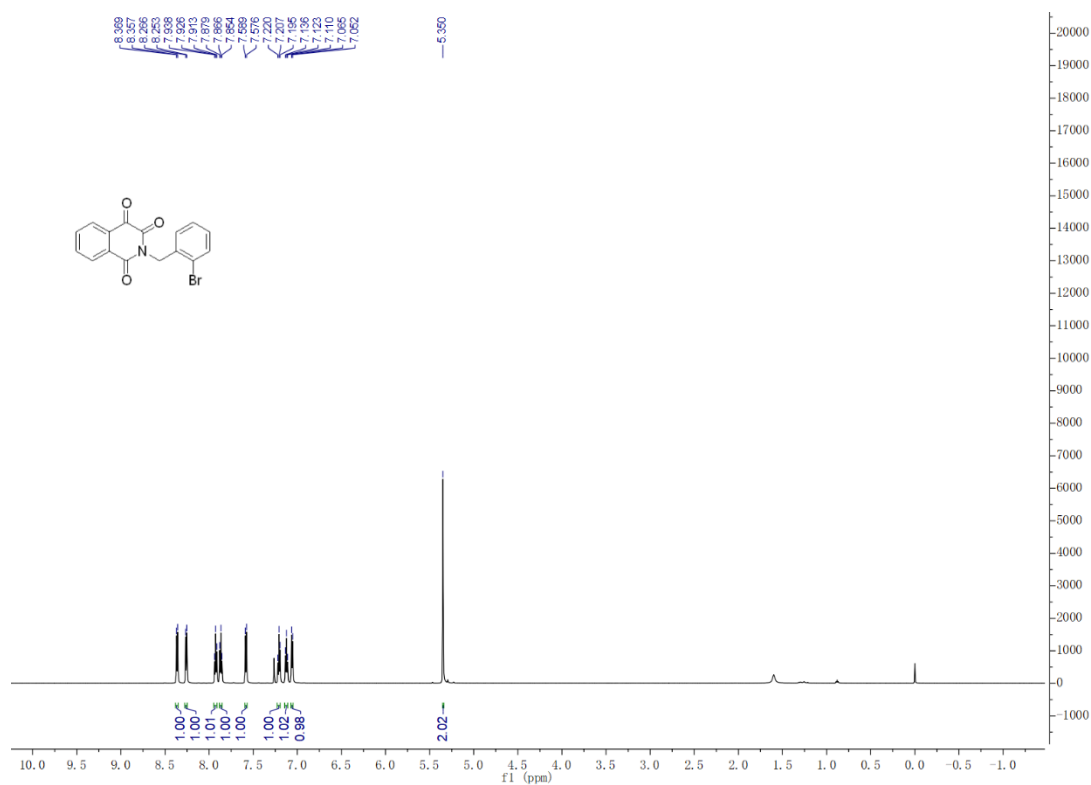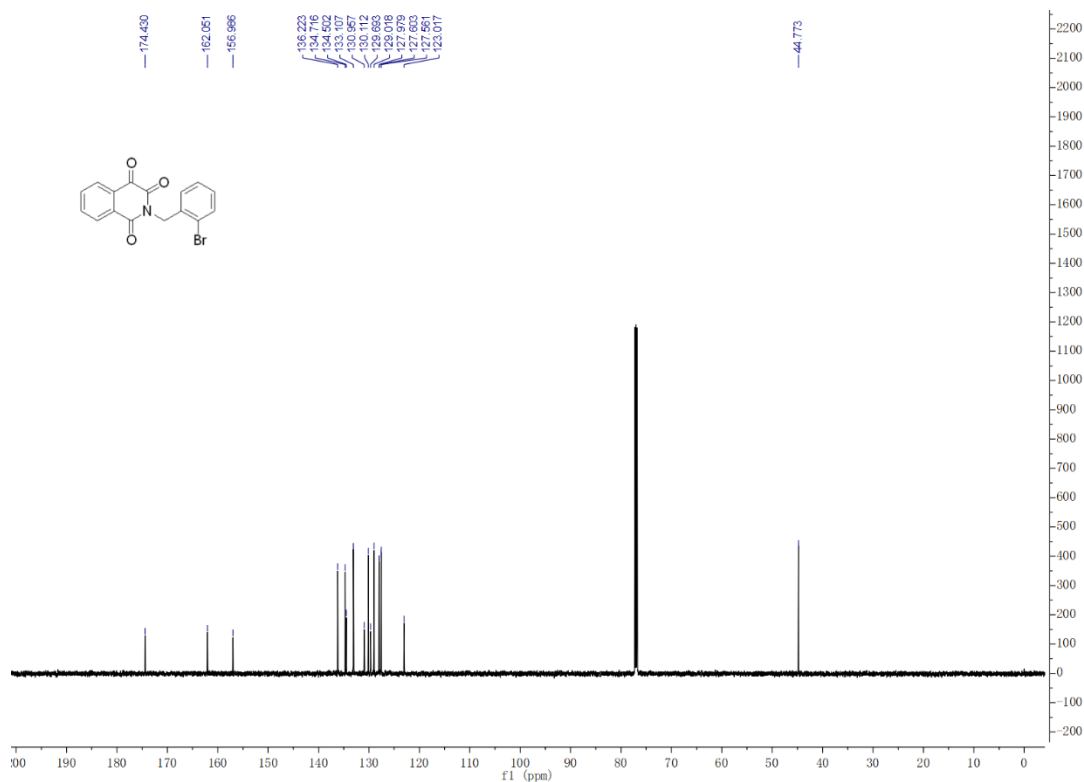

<sup>1</sup>H NMR and <sup>13</sup>C NMR spectra of compound 4n

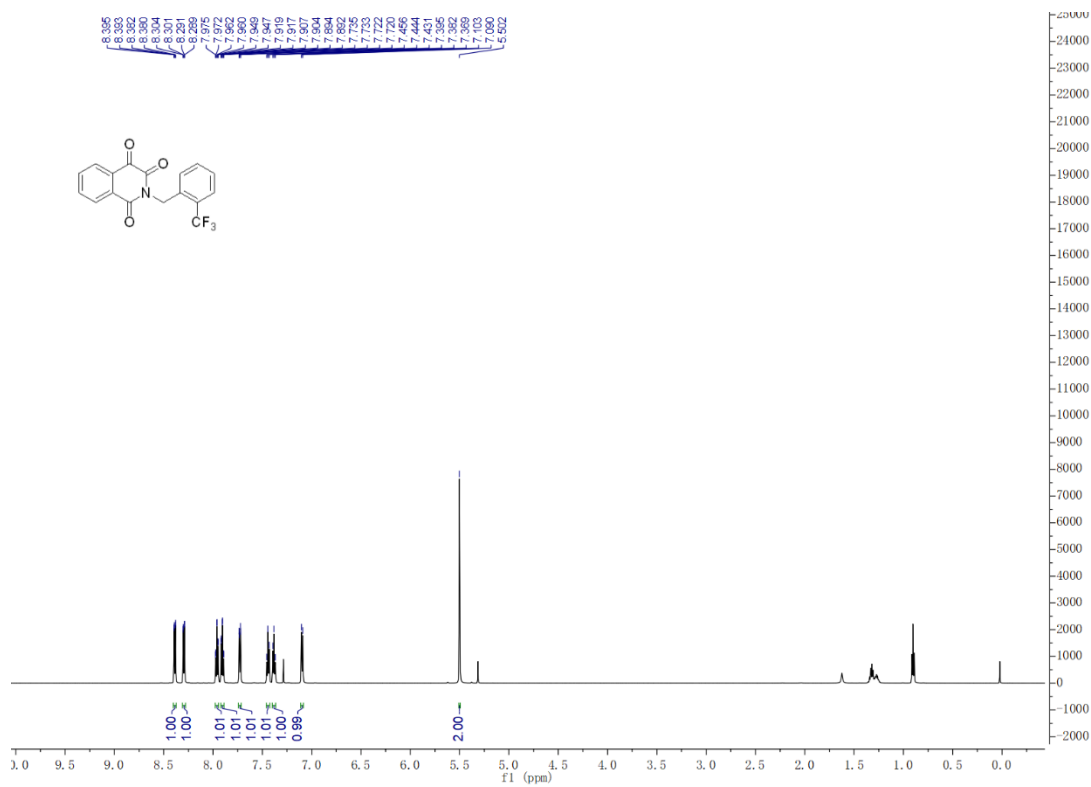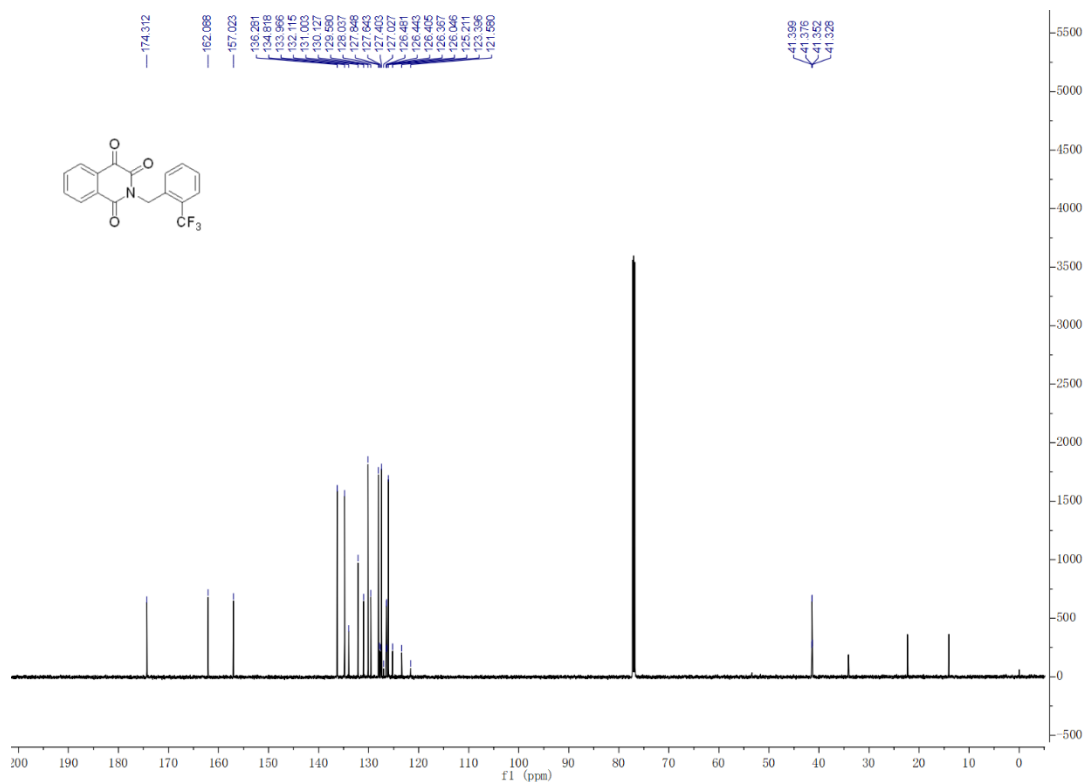



<sup>1</sup>H NMR and <sup>13</sup>C NMR spectra of compound **4o**

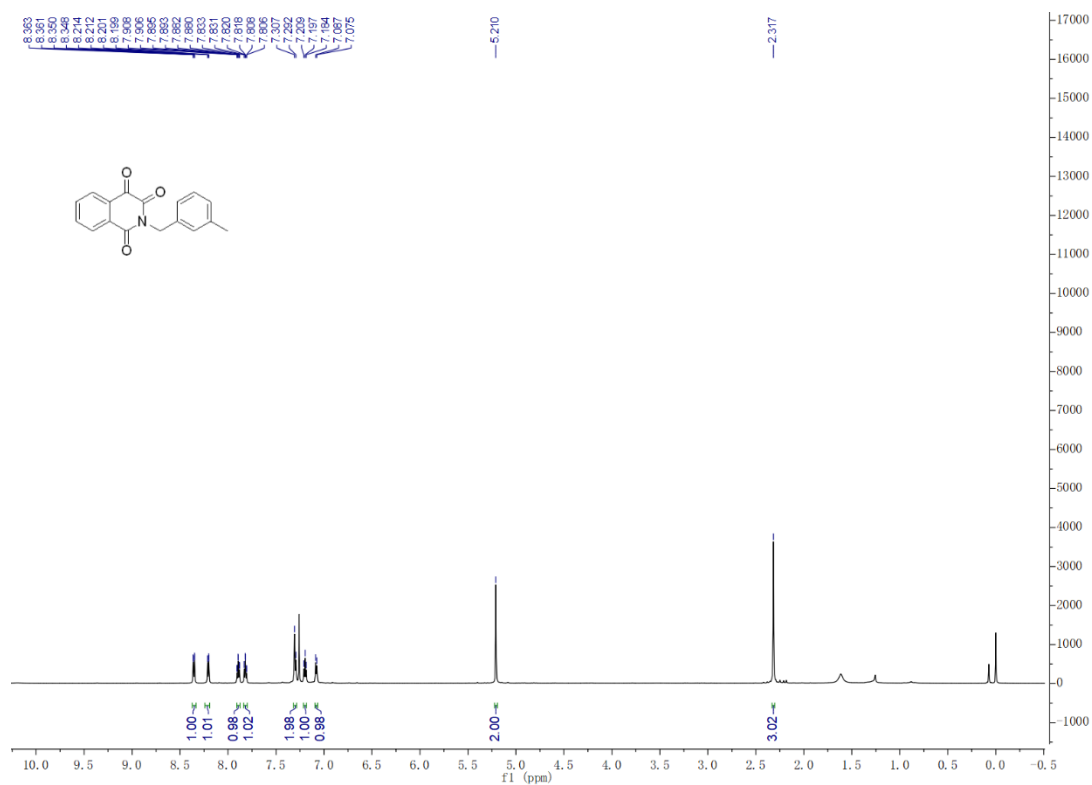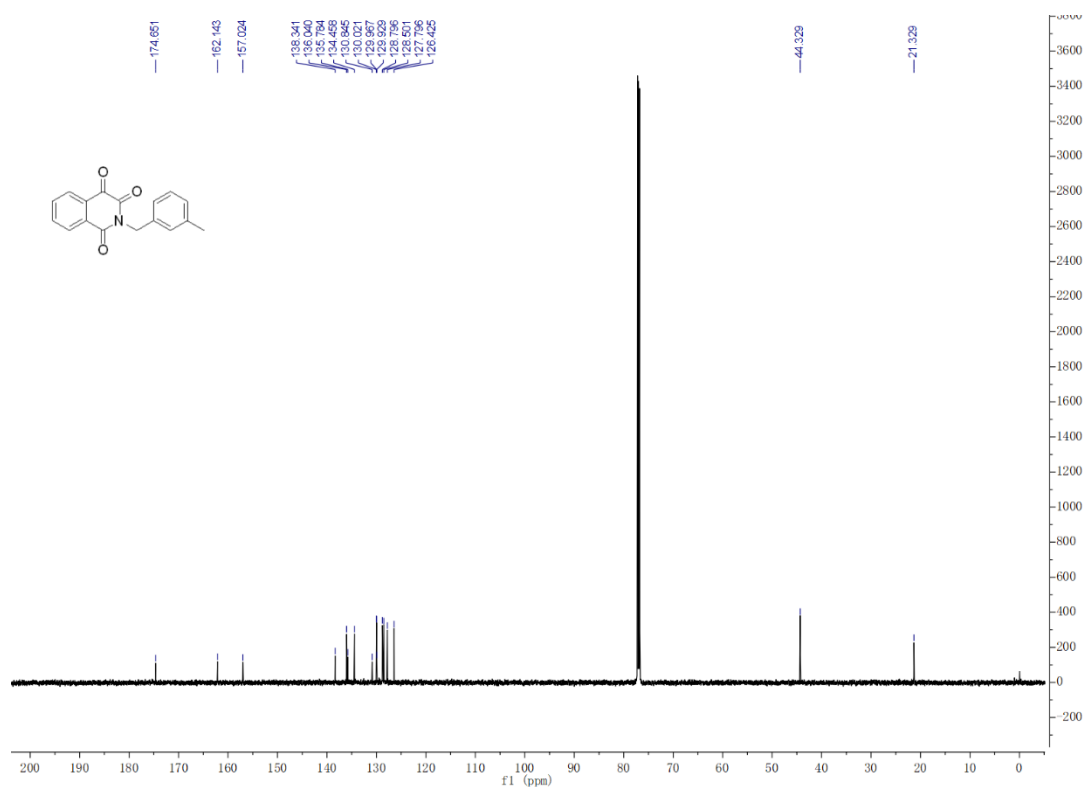

# <sup>1</sup>H NMR and <sup>13</sup>C NMR spectra of compound 4p

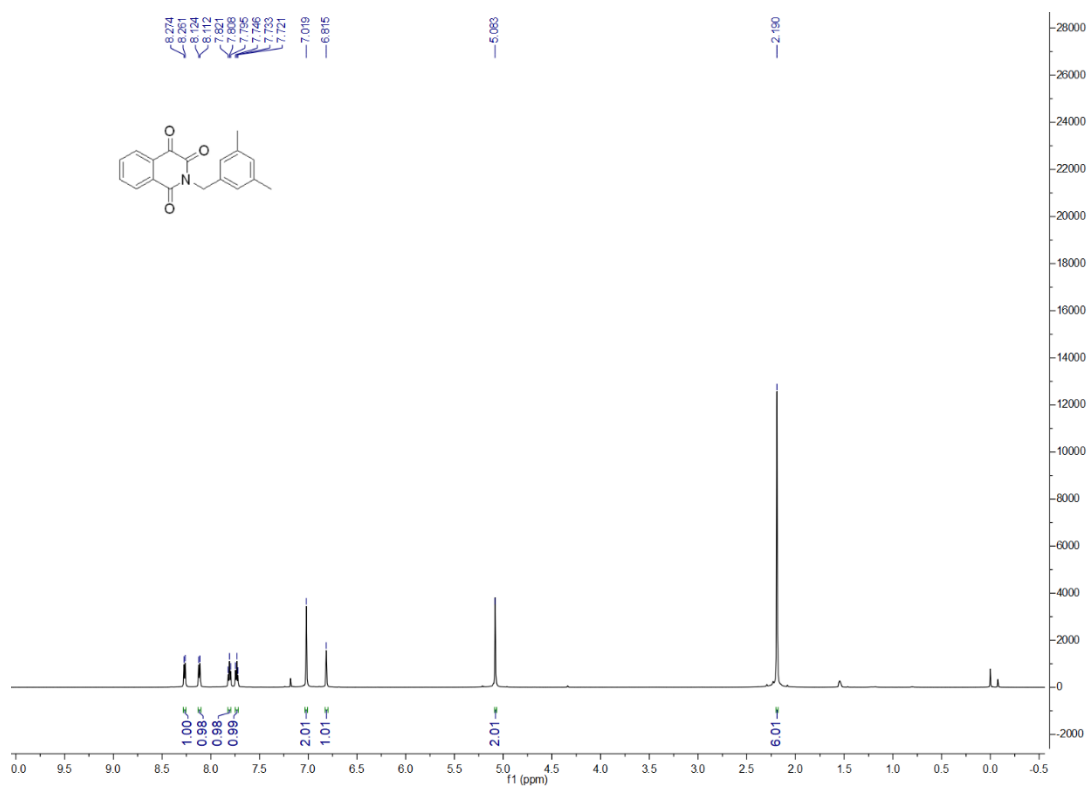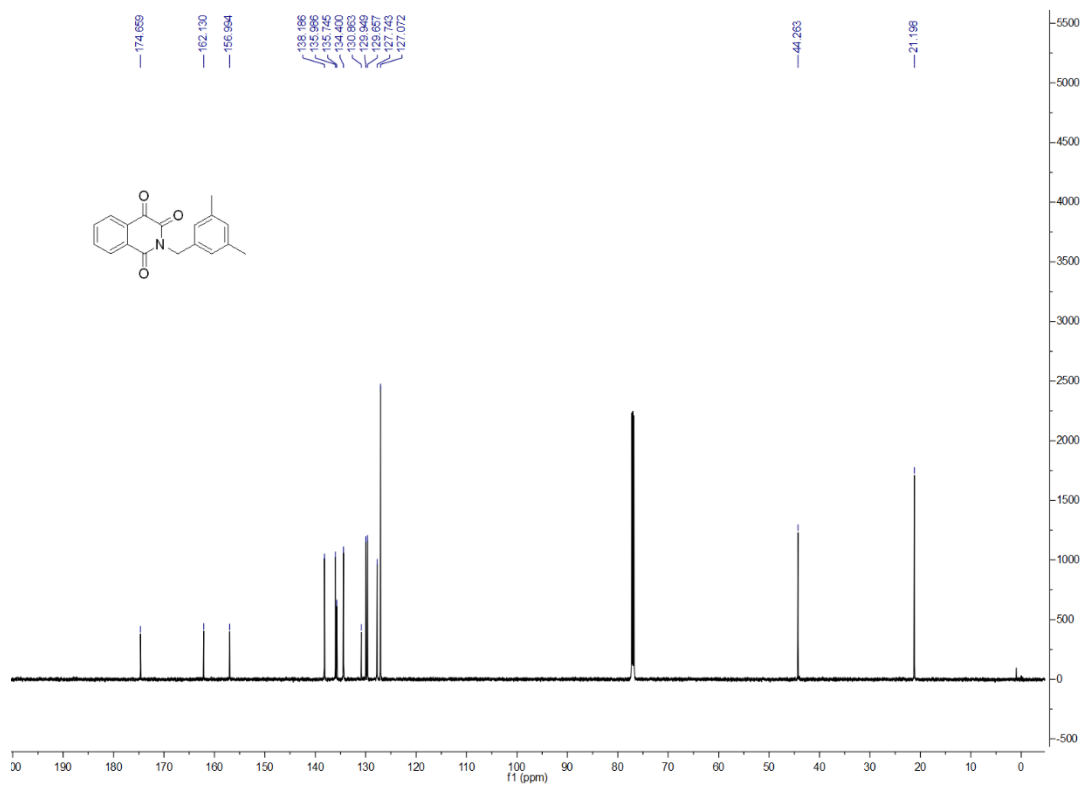

<sup>1</sup>H NMR and <sup>13</sup>C NMR spectra of compound **4q**

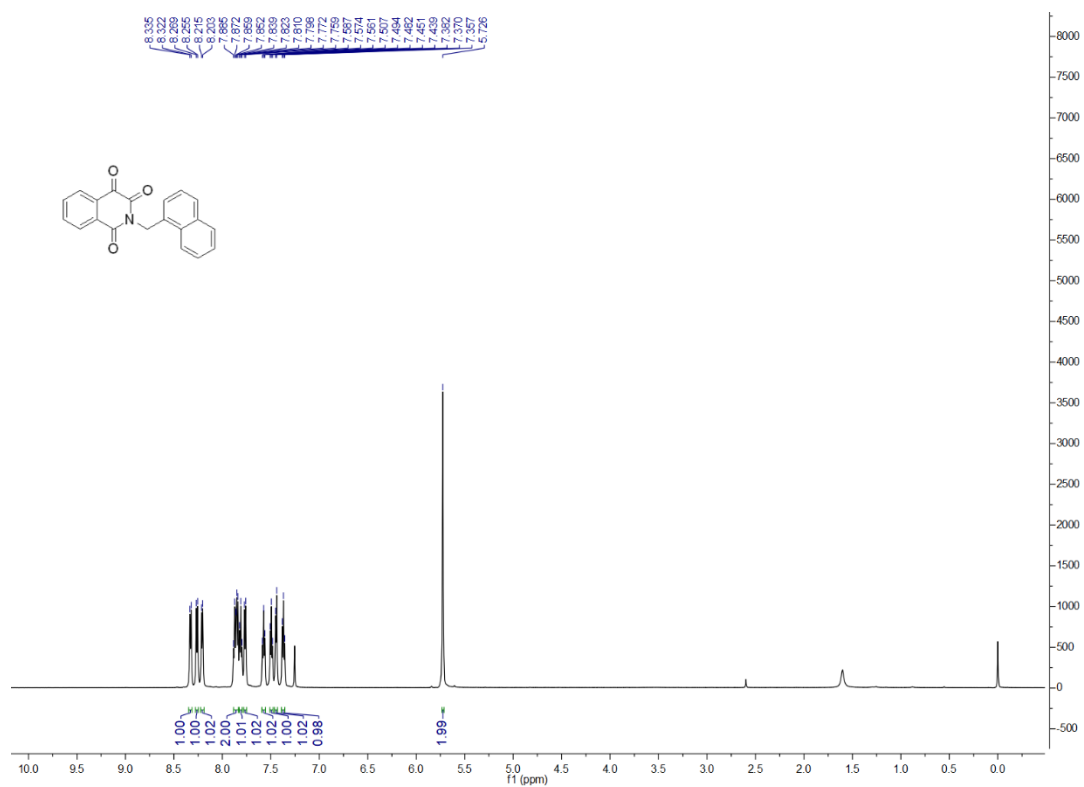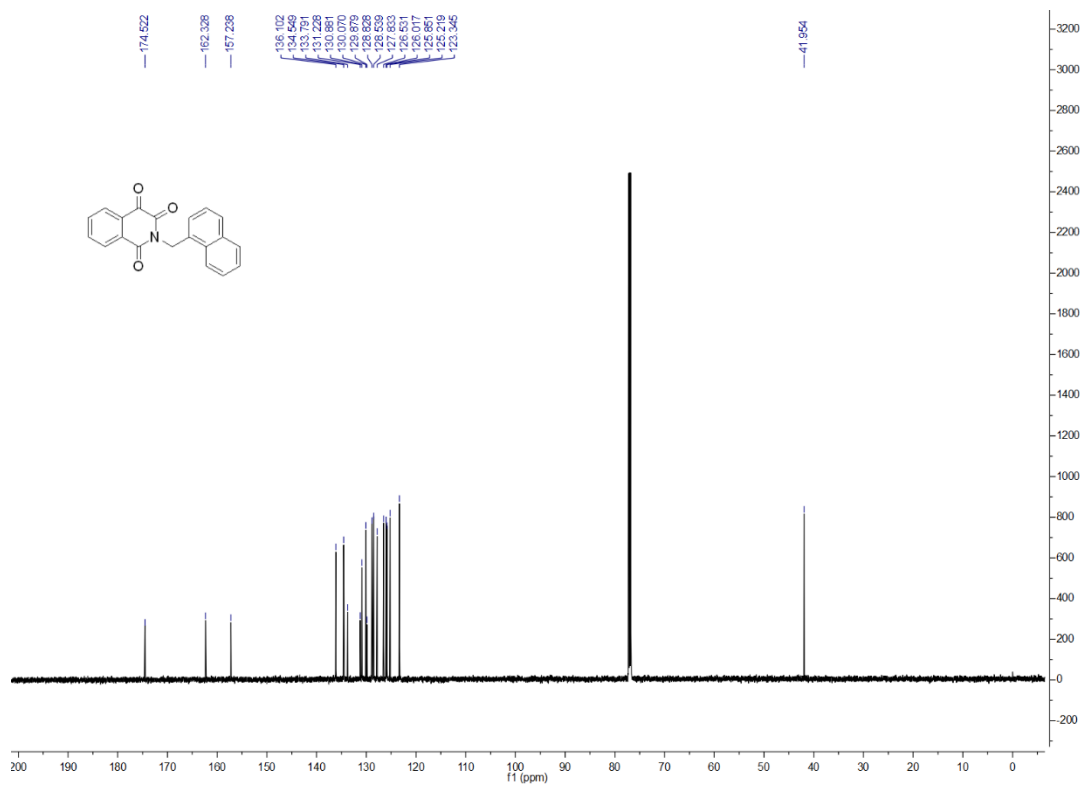

# $^1\text{H}$ NMR and $^{13}\text{C}$ NMR spectra of compound **4r**

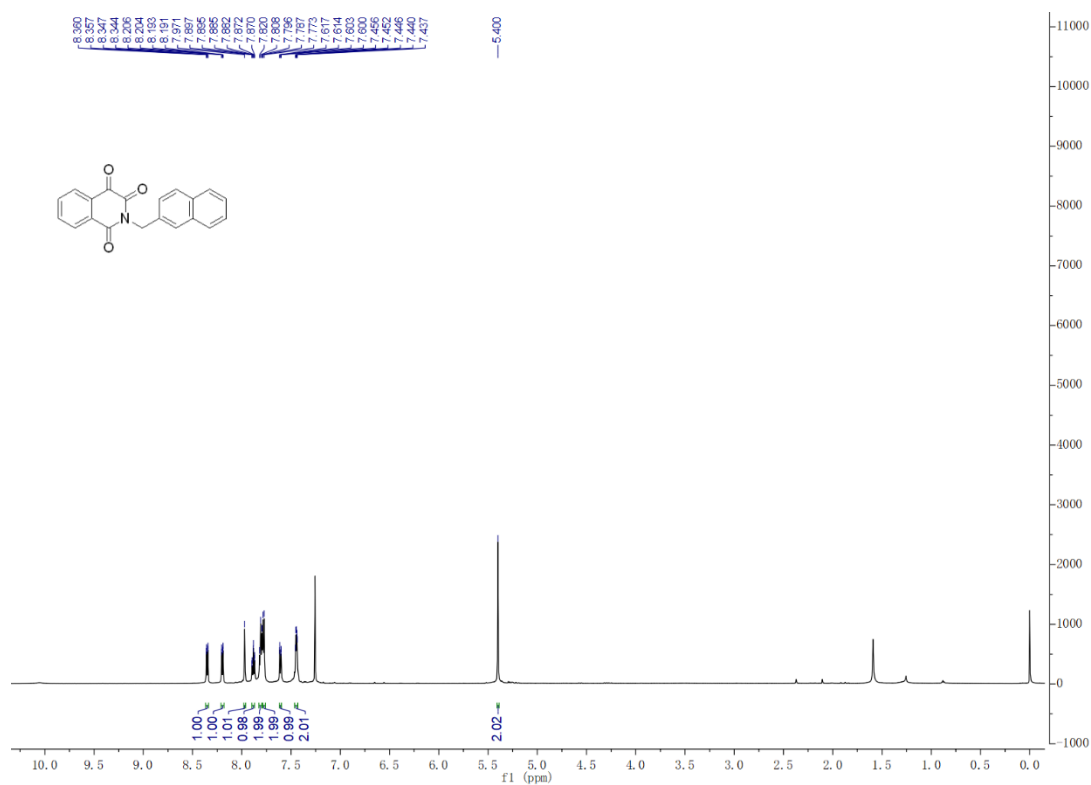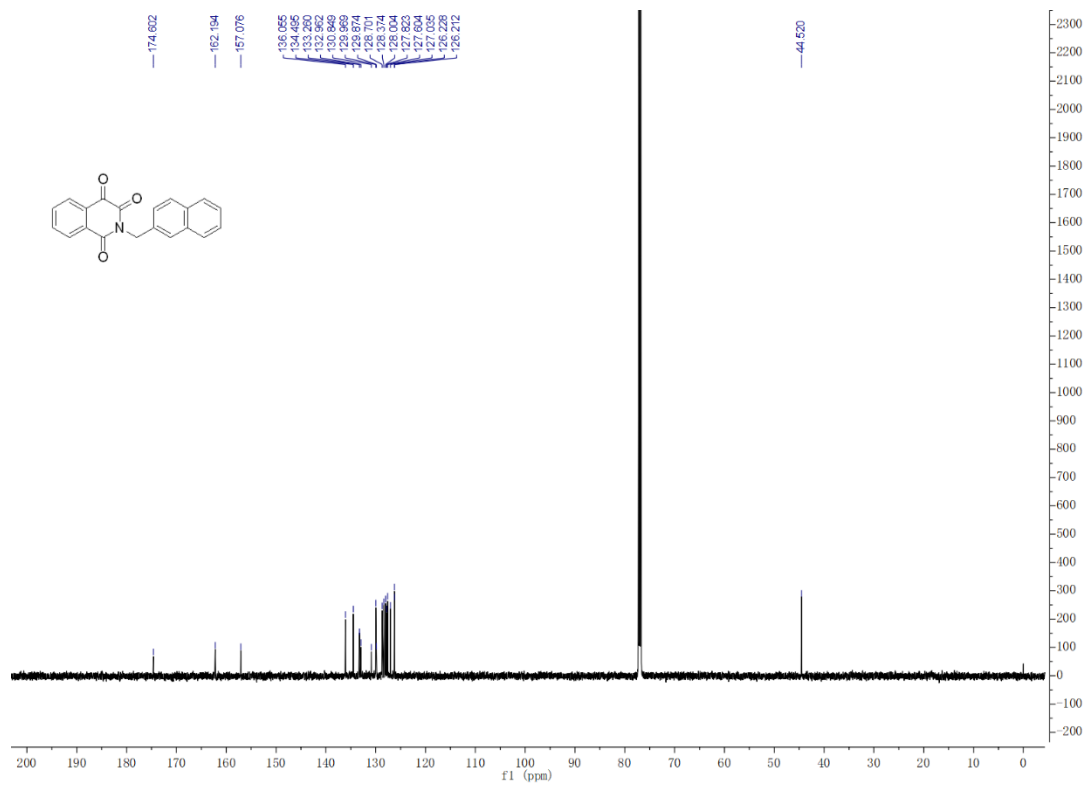

# <sup>1</sup>H NMR and <sup>13</sup>C NMR spectra of compound 4s

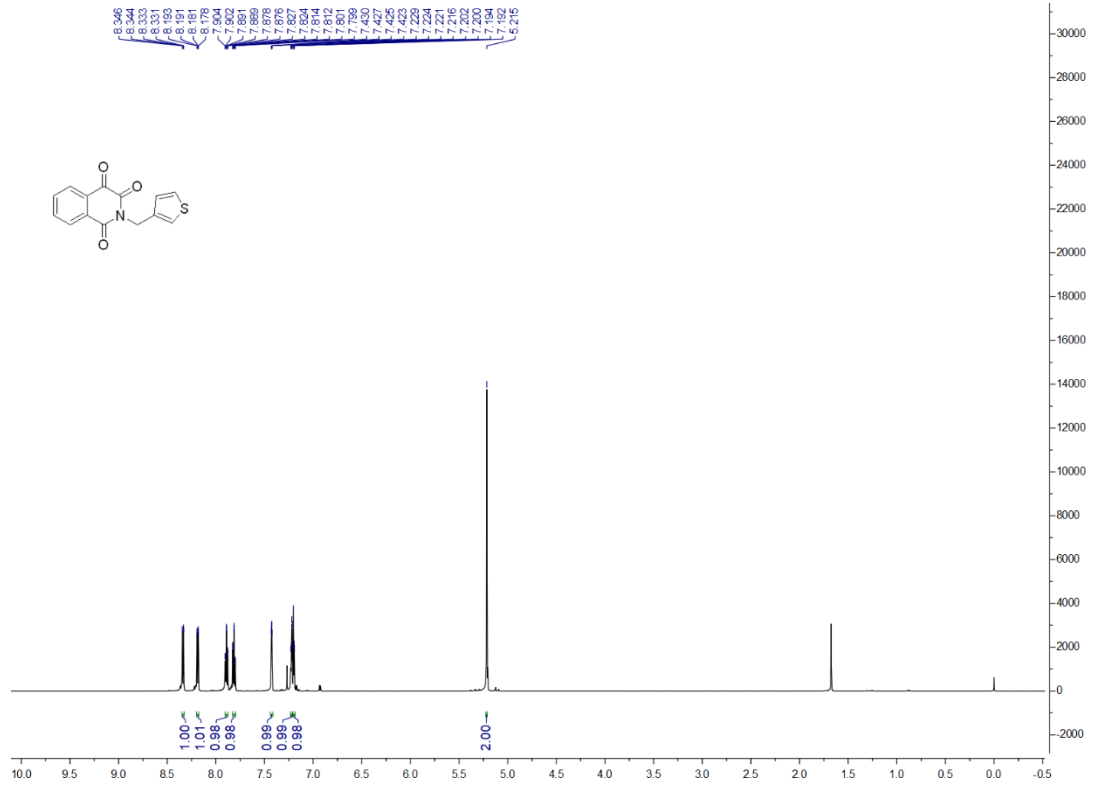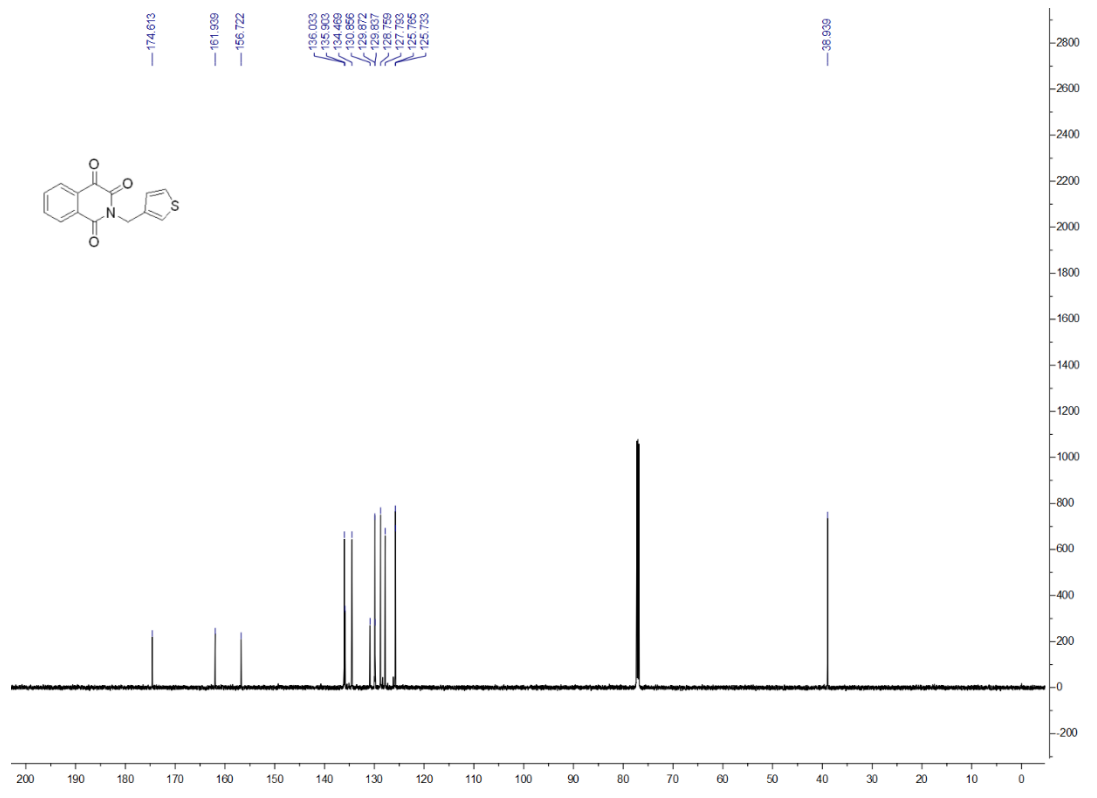

# $^1\text{H}$ NMR and $^{13}\text{C}$ NMR spectra of compound **4t**

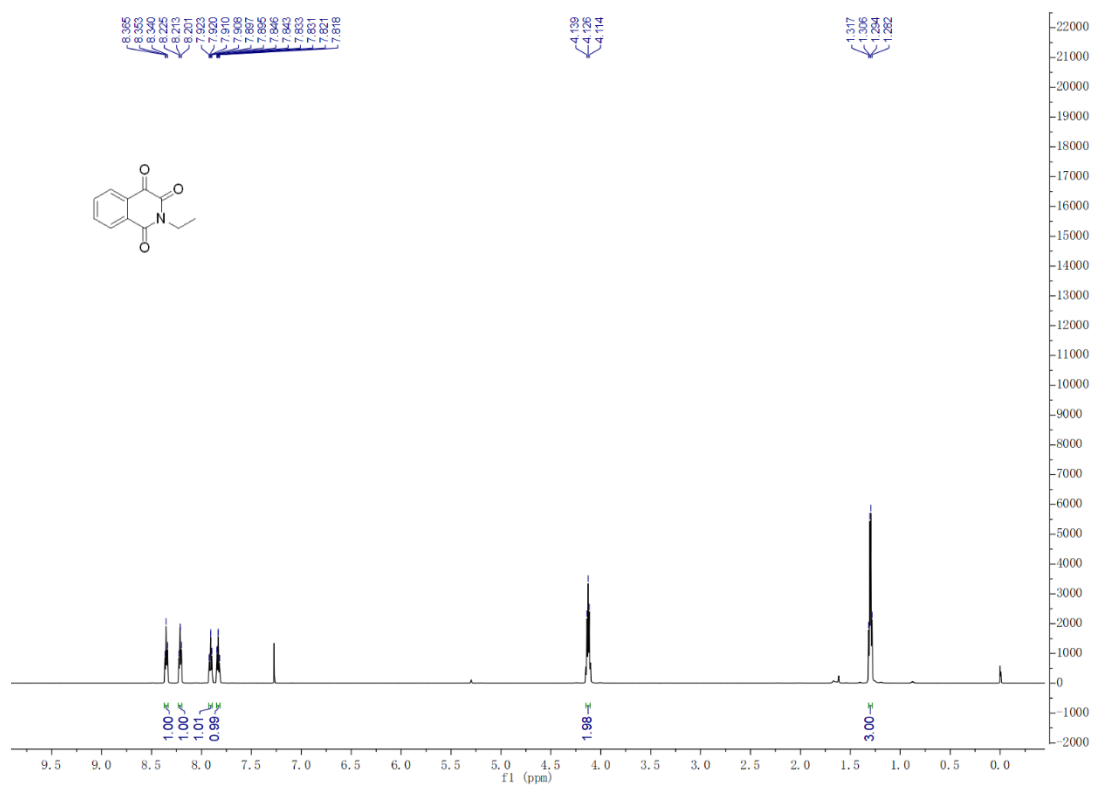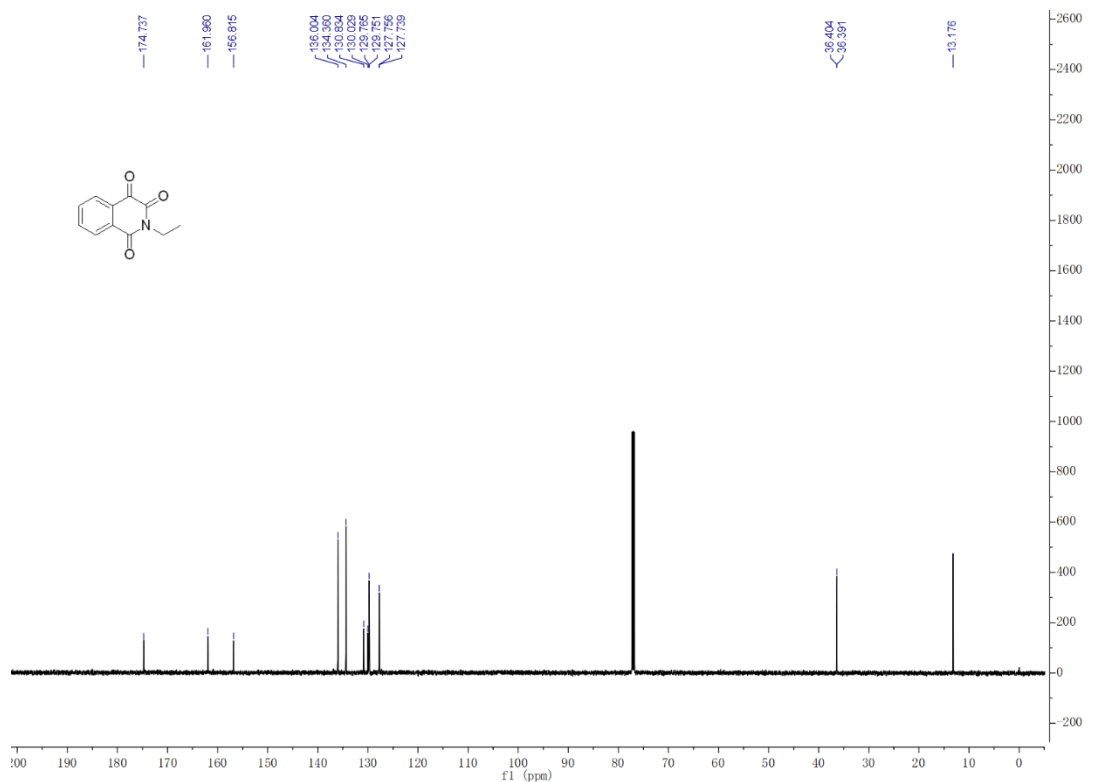

# <sup>1</sup>H NMR and <sup>13</sup>C NMR spectra of compound 4u

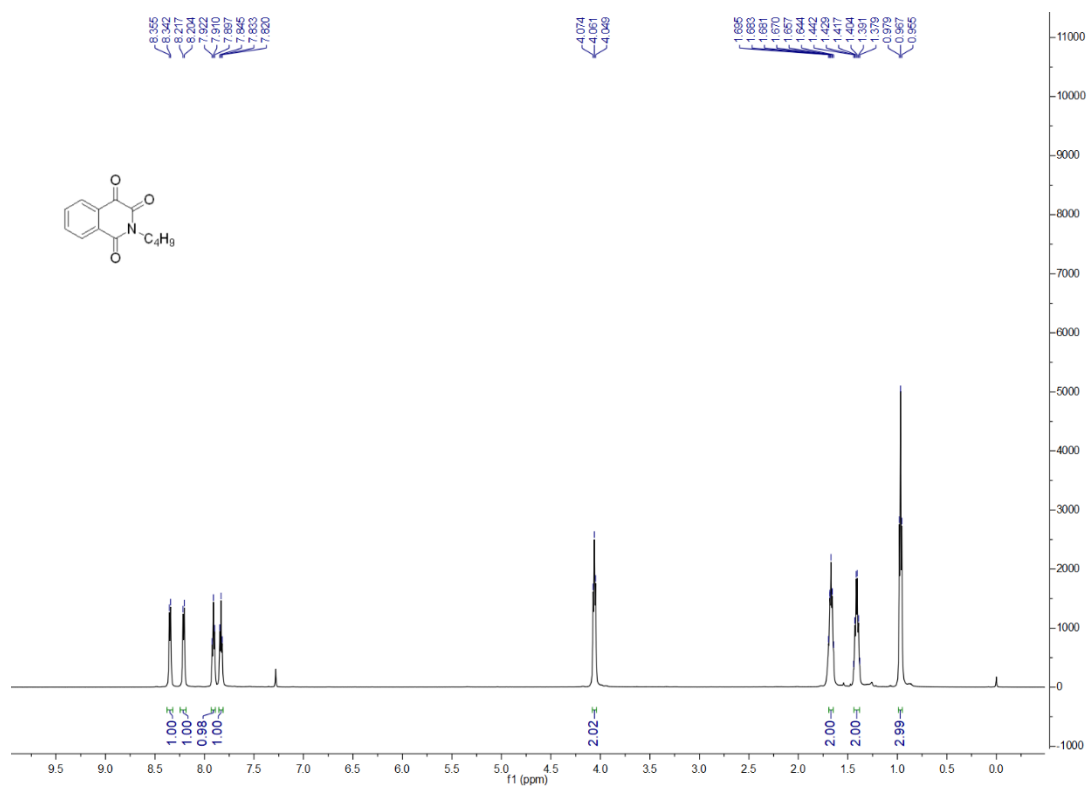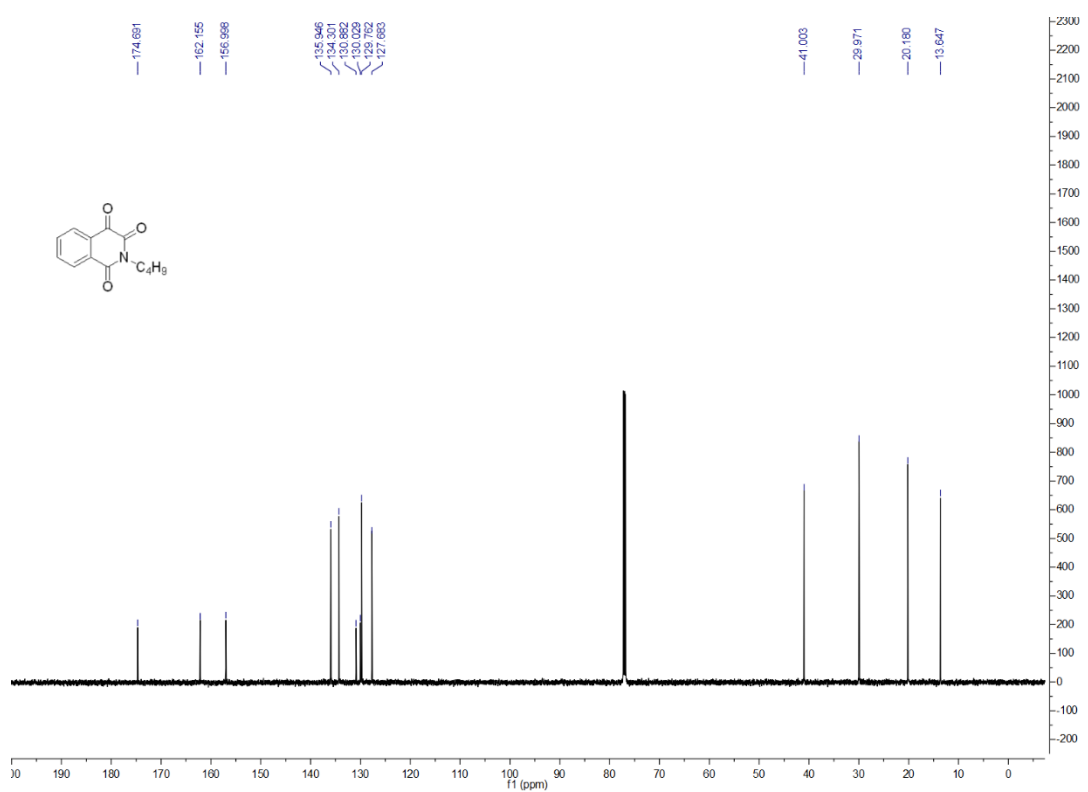

# <sup>1</sup>H NMR and <sup>13</sup>C NMR spectra of compound 4v

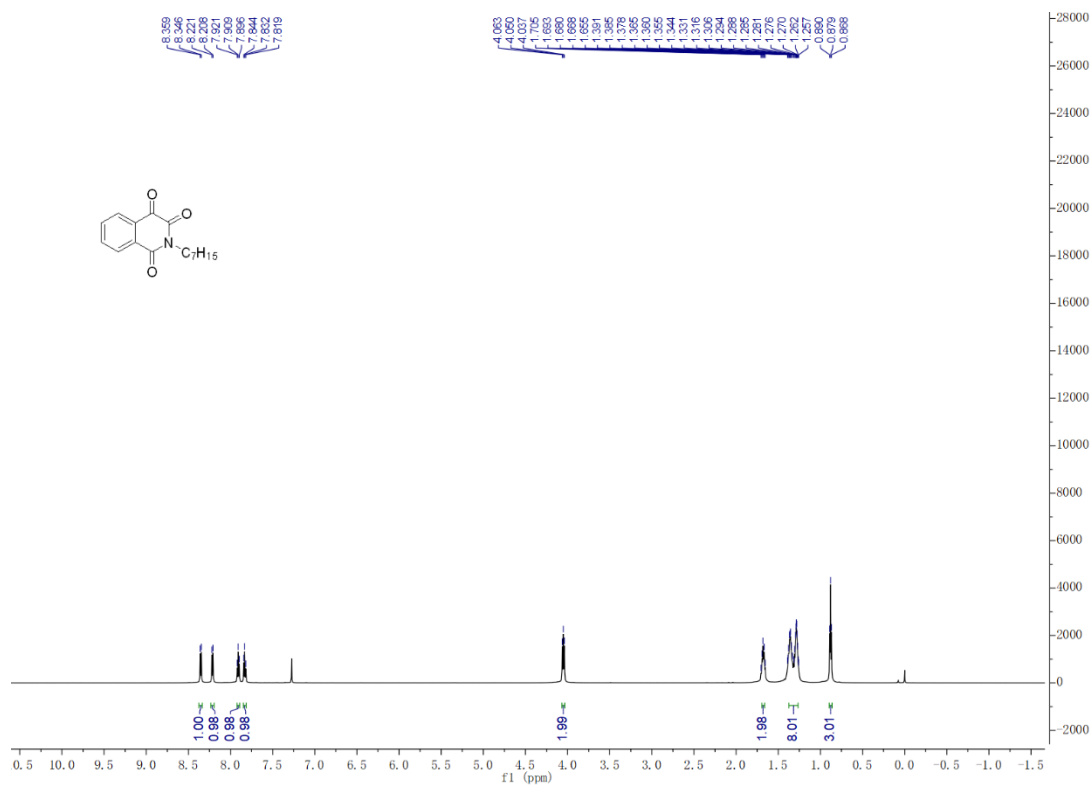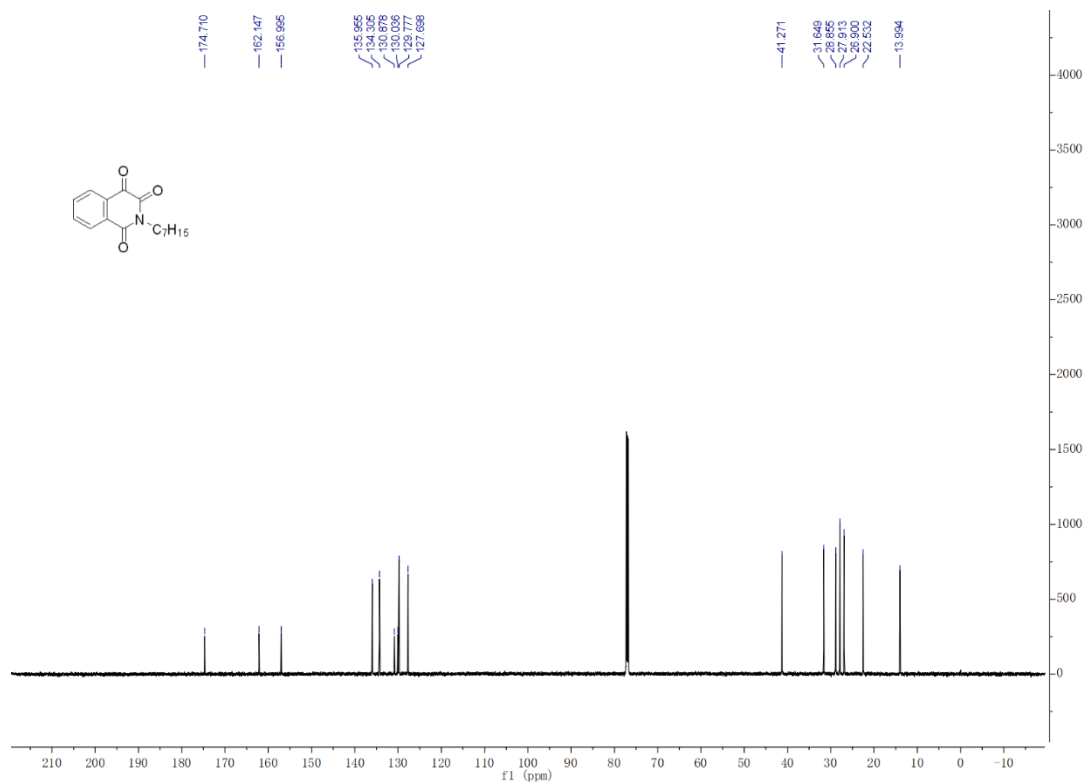



<sup>1</sup>H NMR and <sup>13</sup>C NMR spectra of compound **4w**

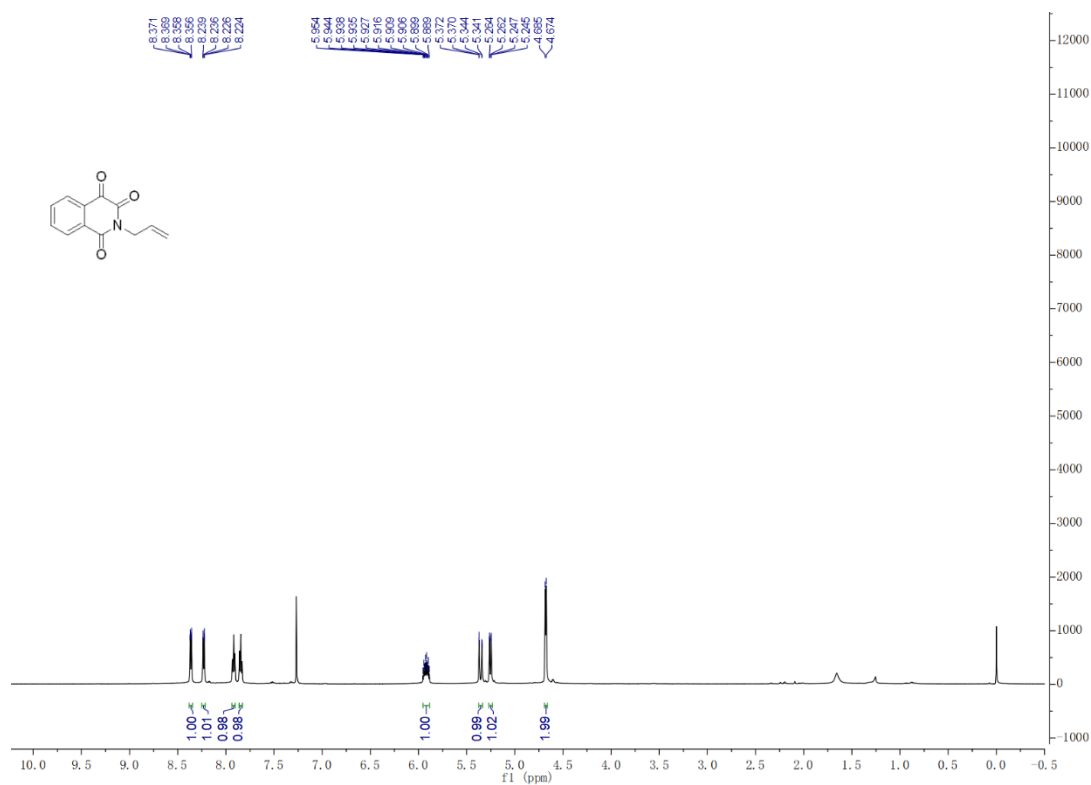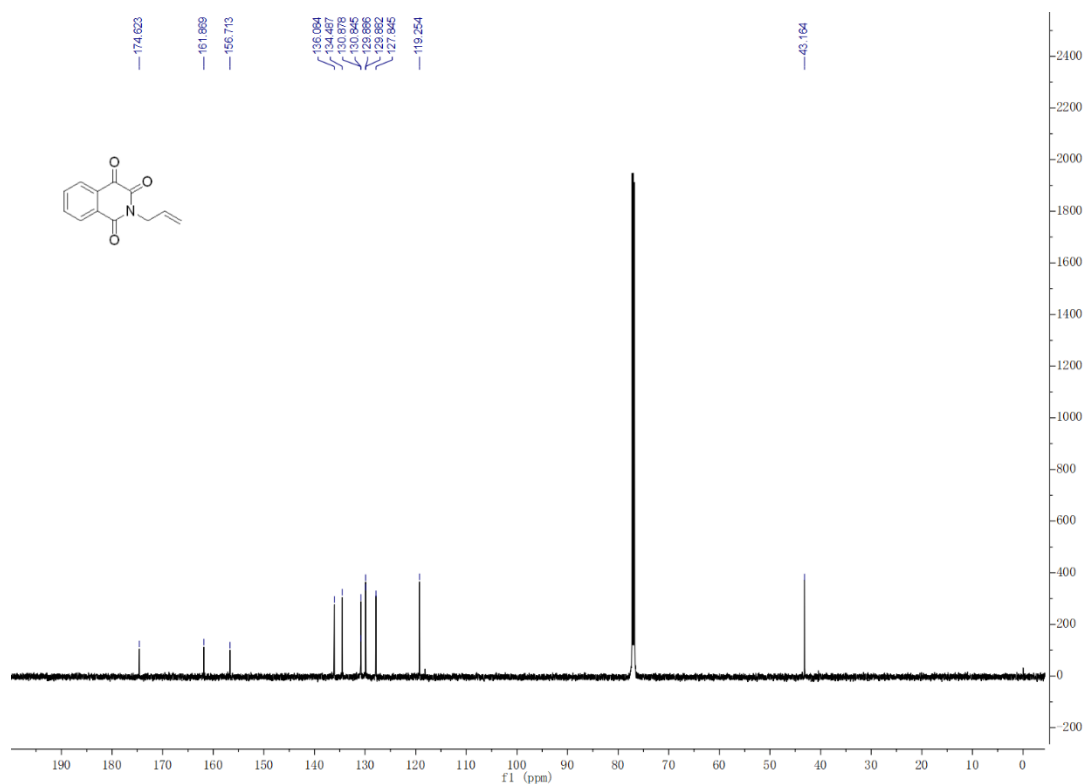

# <sup>1</sup>H NMR and <sup>13</sup>C NMR spectra of compound 4x

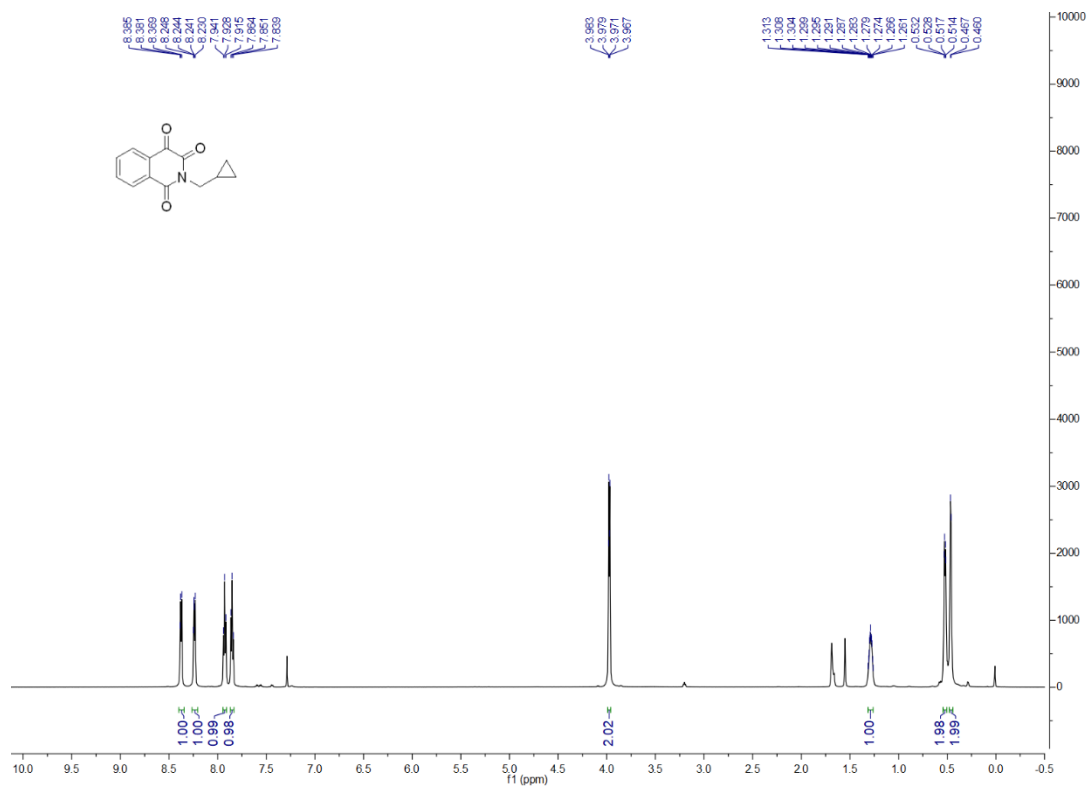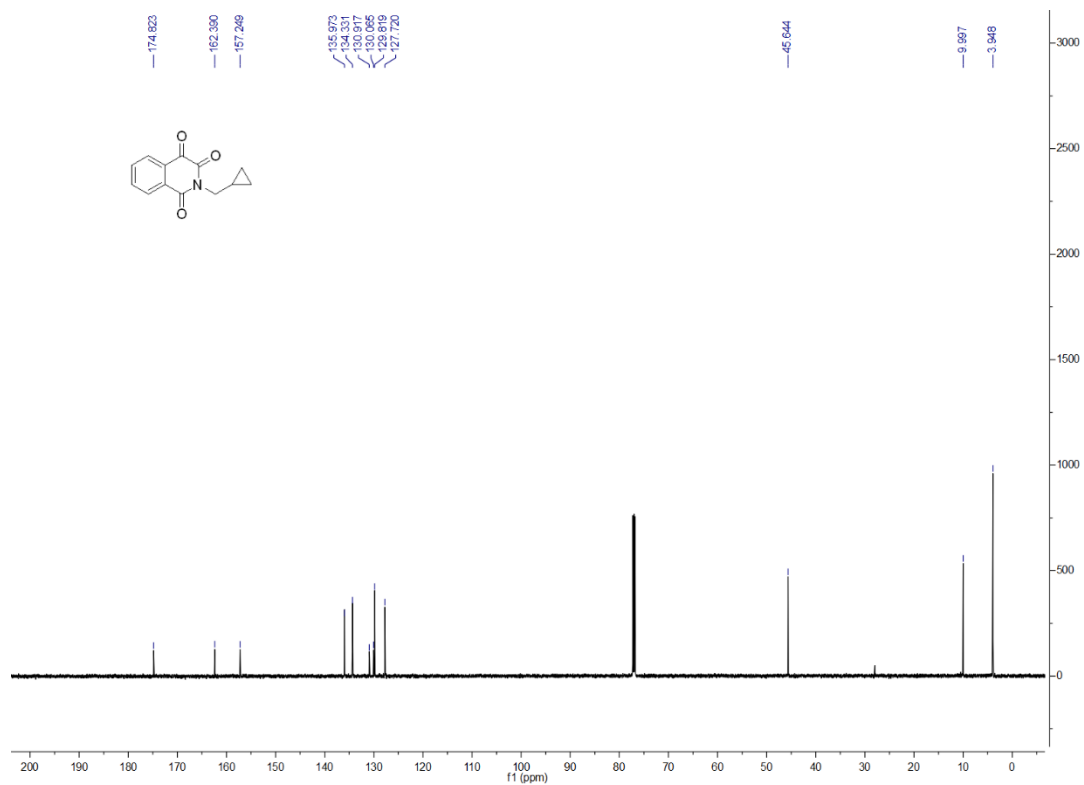

# <sup>1</sup>H NMR and <sup>13</sup>C NMR spectra of compound **4y**

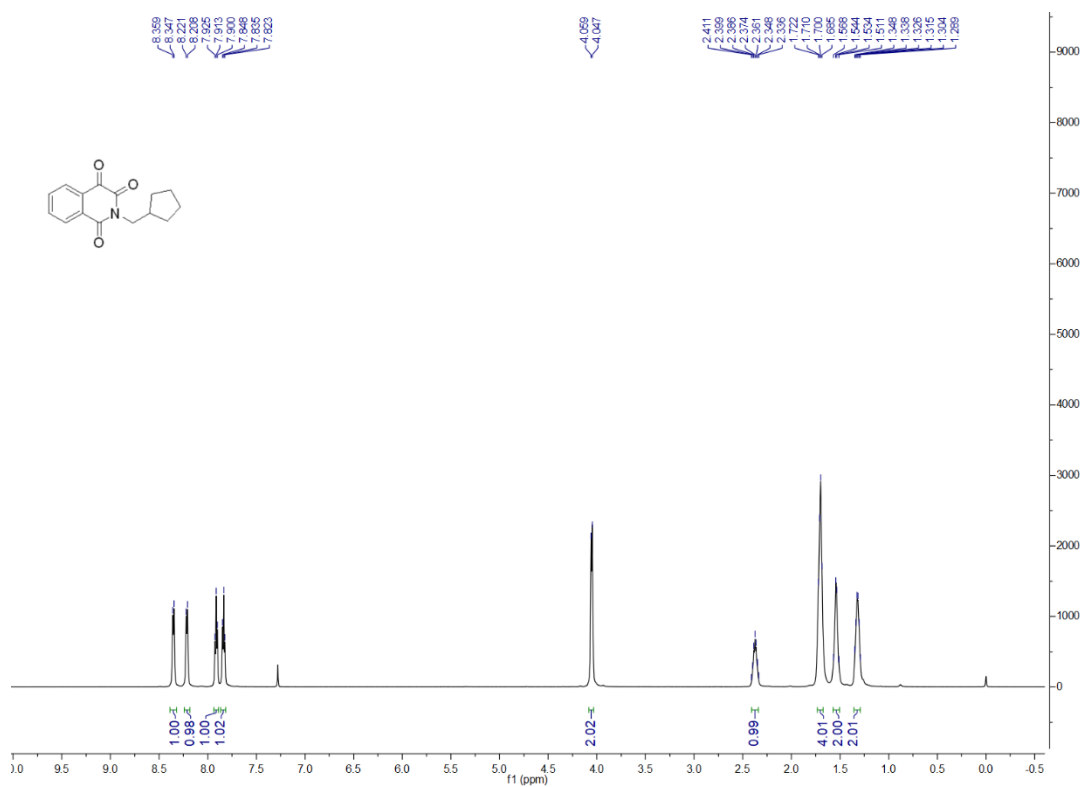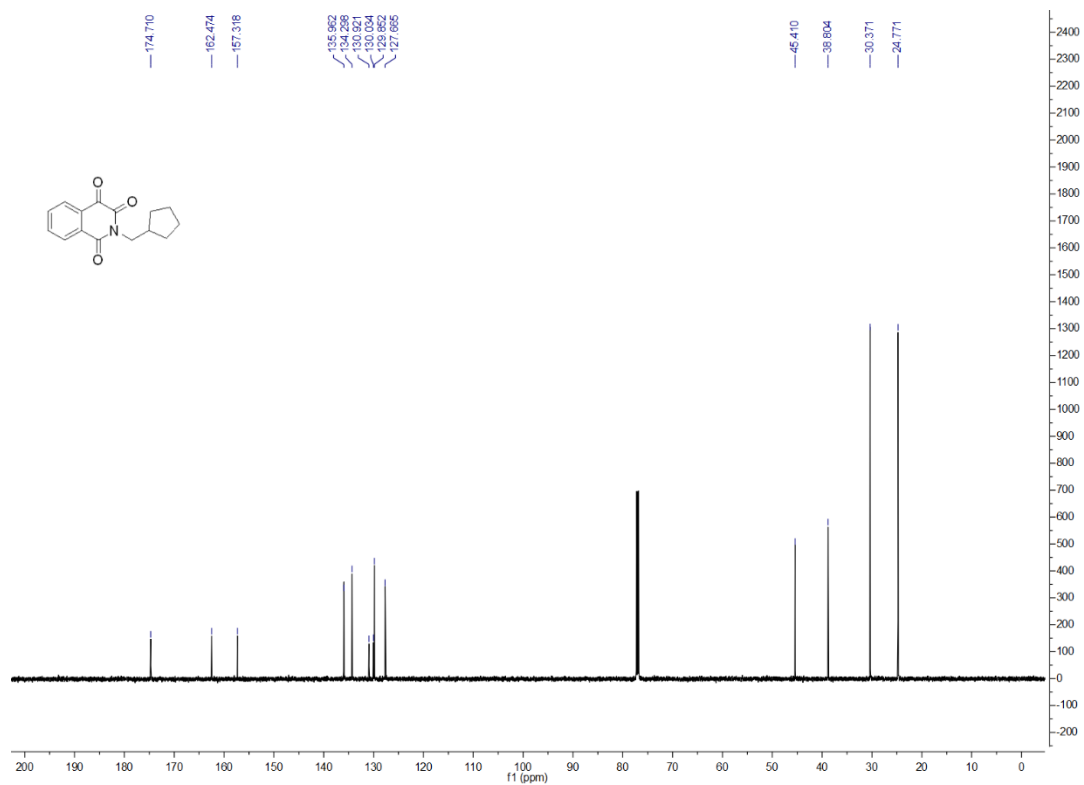

# <sup>1</sup>H NMR and <sup>13</sup>C NMR spectra of compound 4z

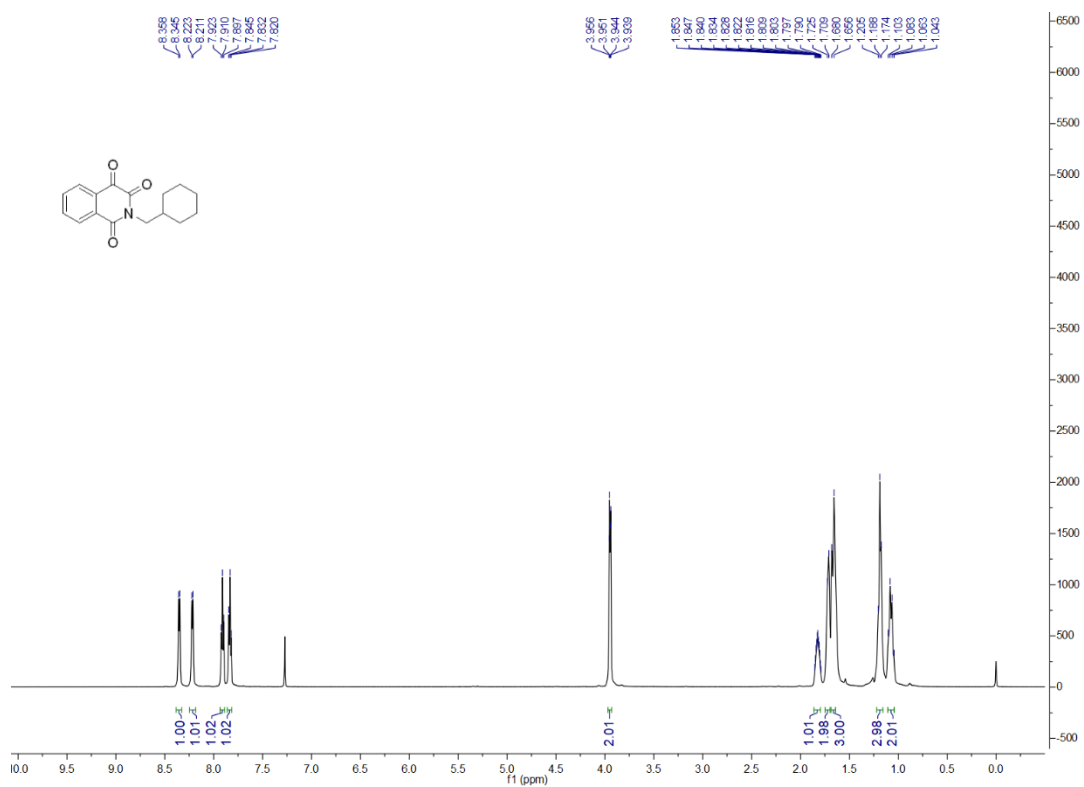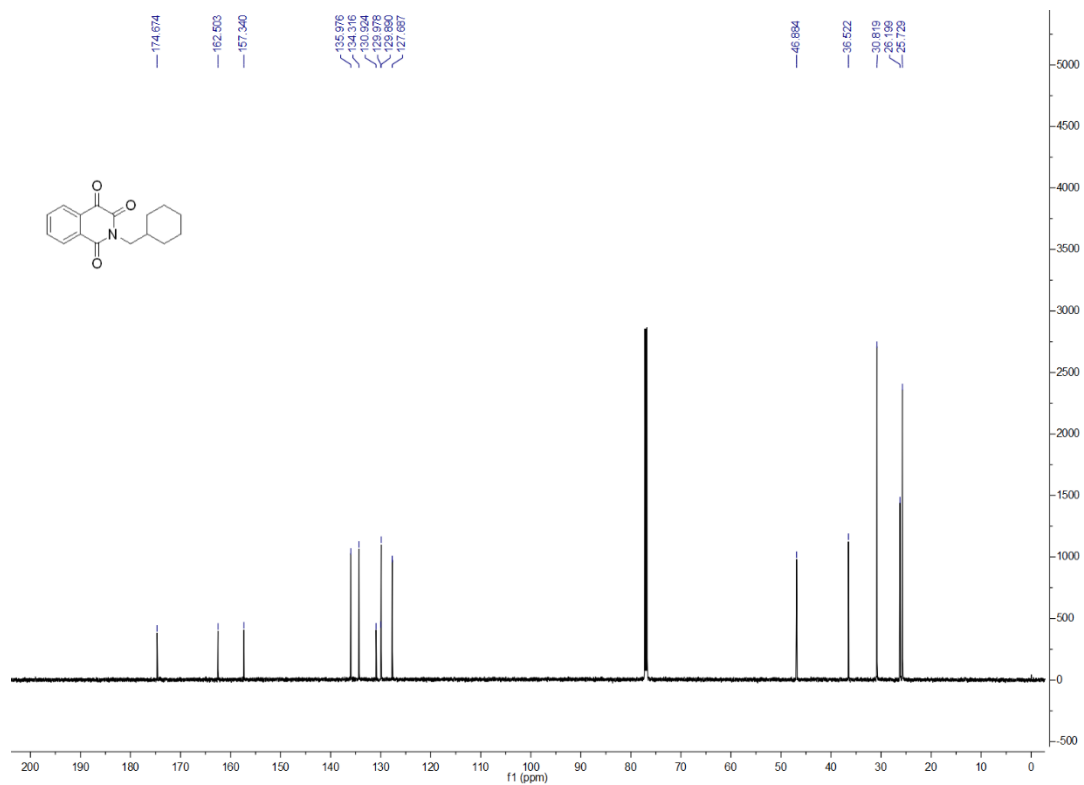

# <sup>1</sup>H NMR and <sup>13</sup>C NMR spectra of compound 4aa

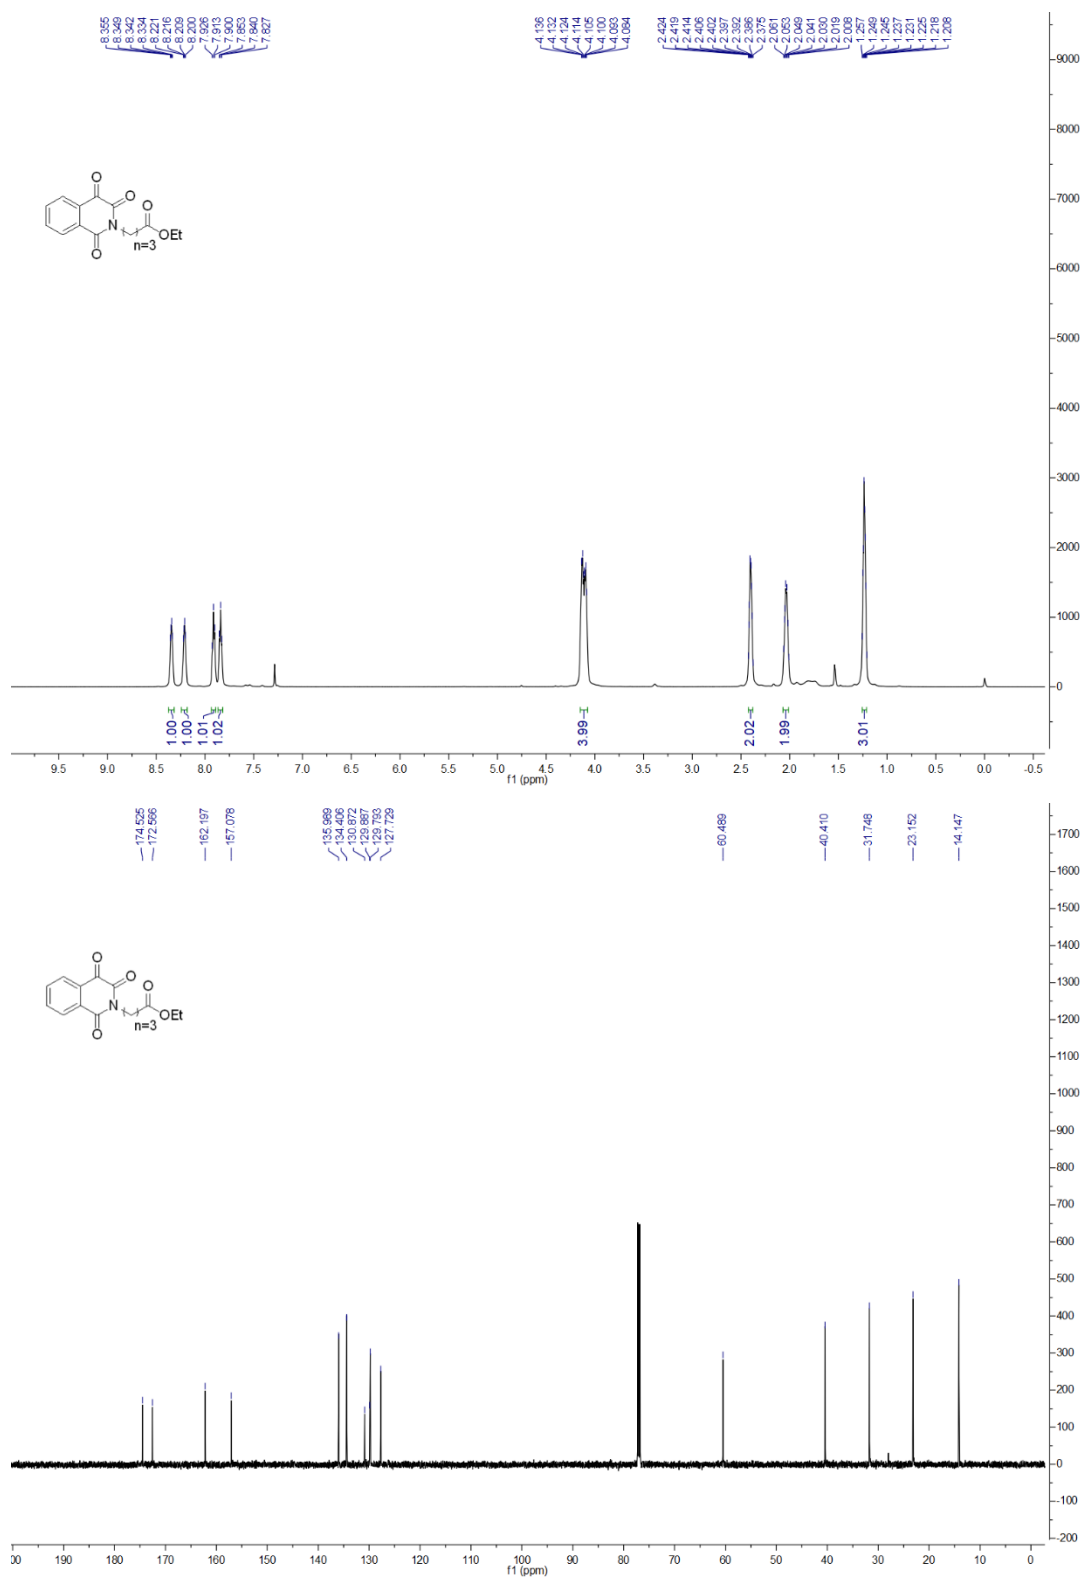

# <sup>1</sup>H NMR and <sup>13</sup>C NMR spectra of compound 4ab

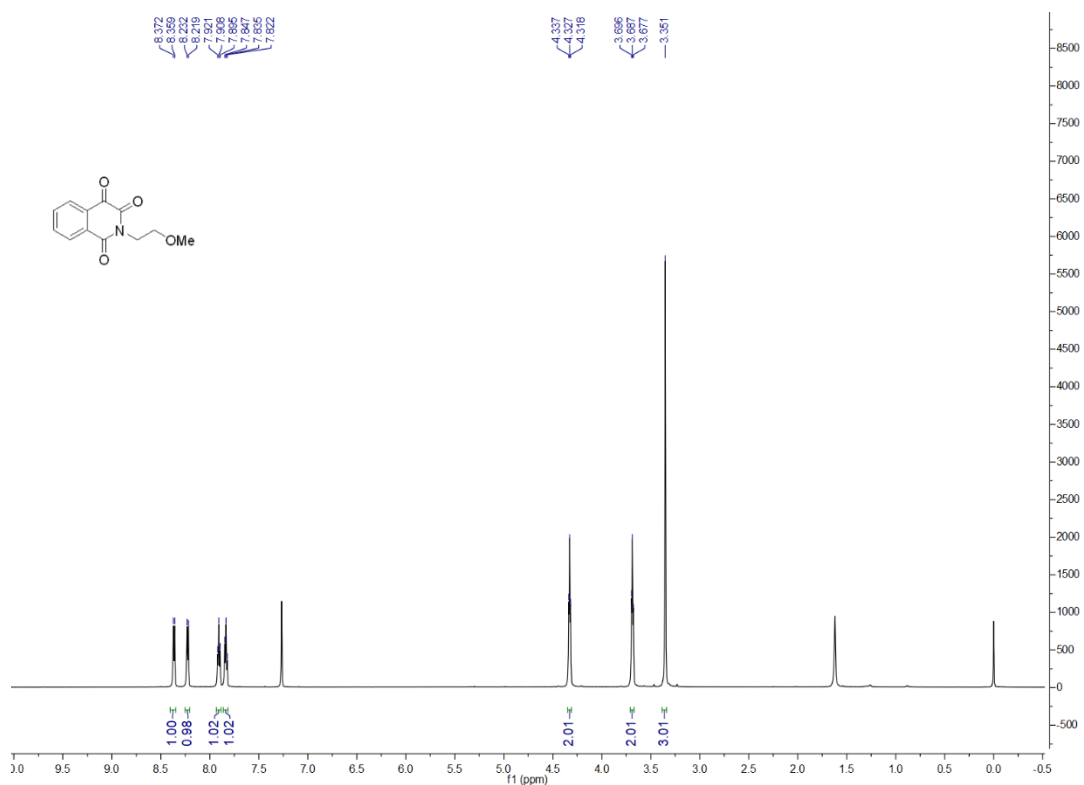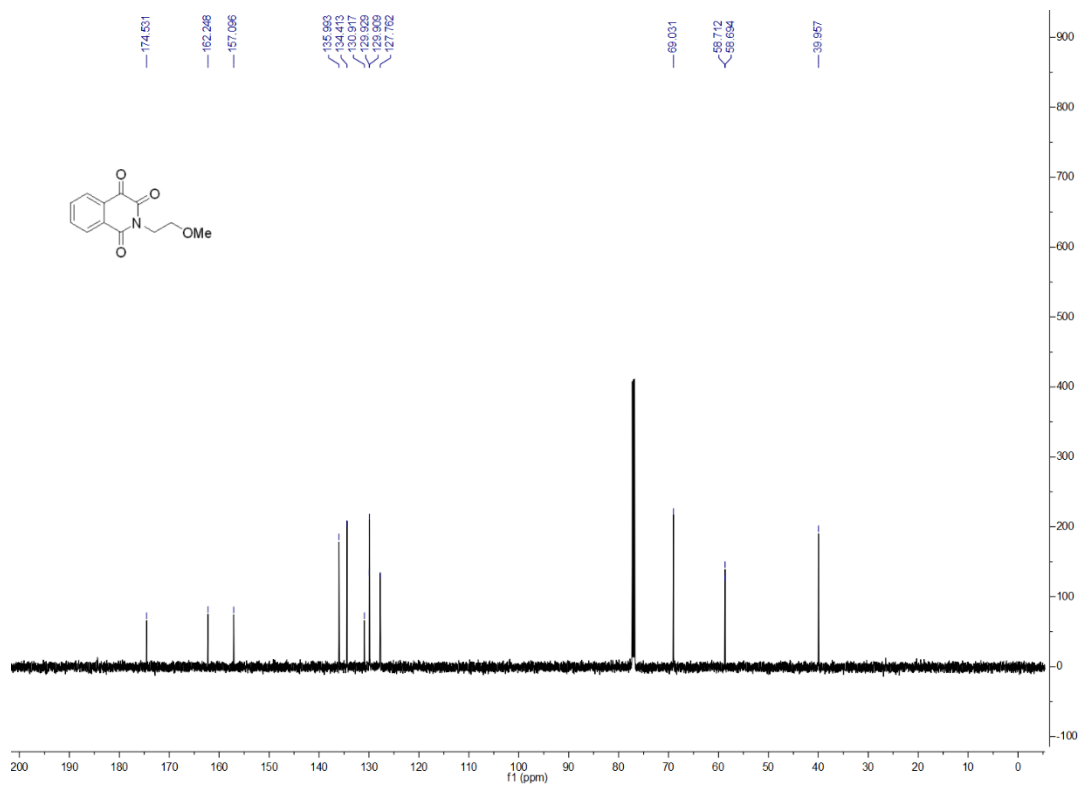

# <sup>1</sup>H NMR and <sup>13</sup>C NMR spectra of compound **4ac**

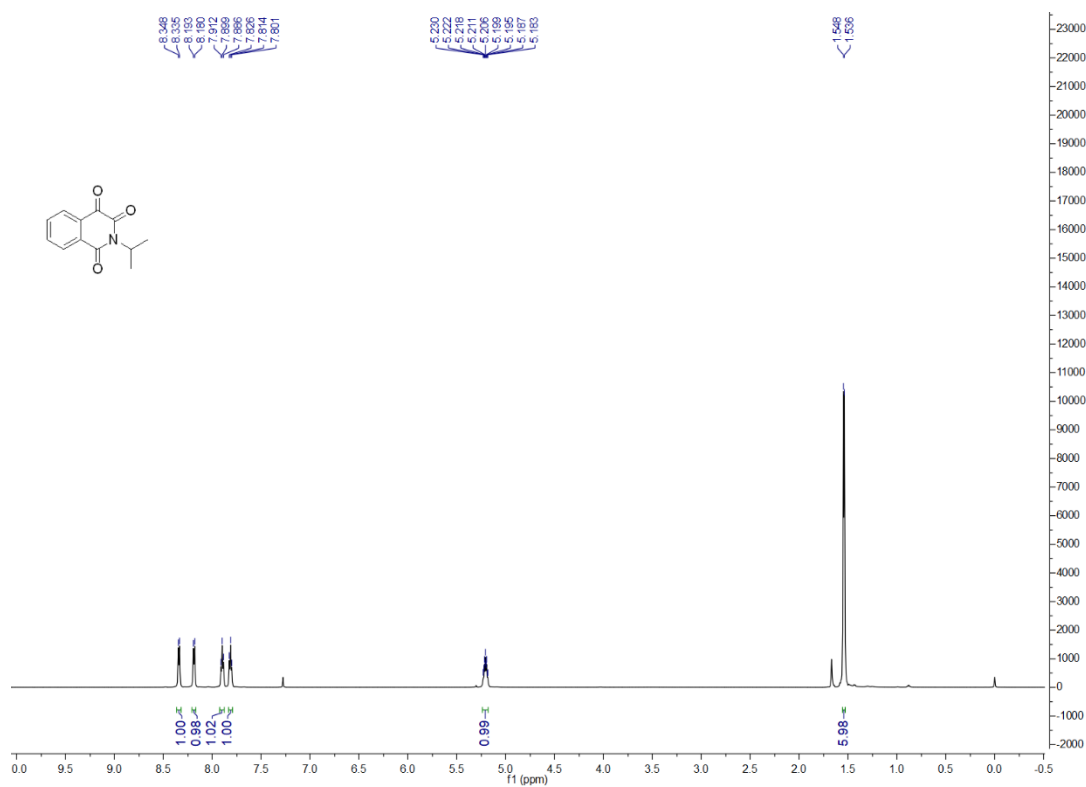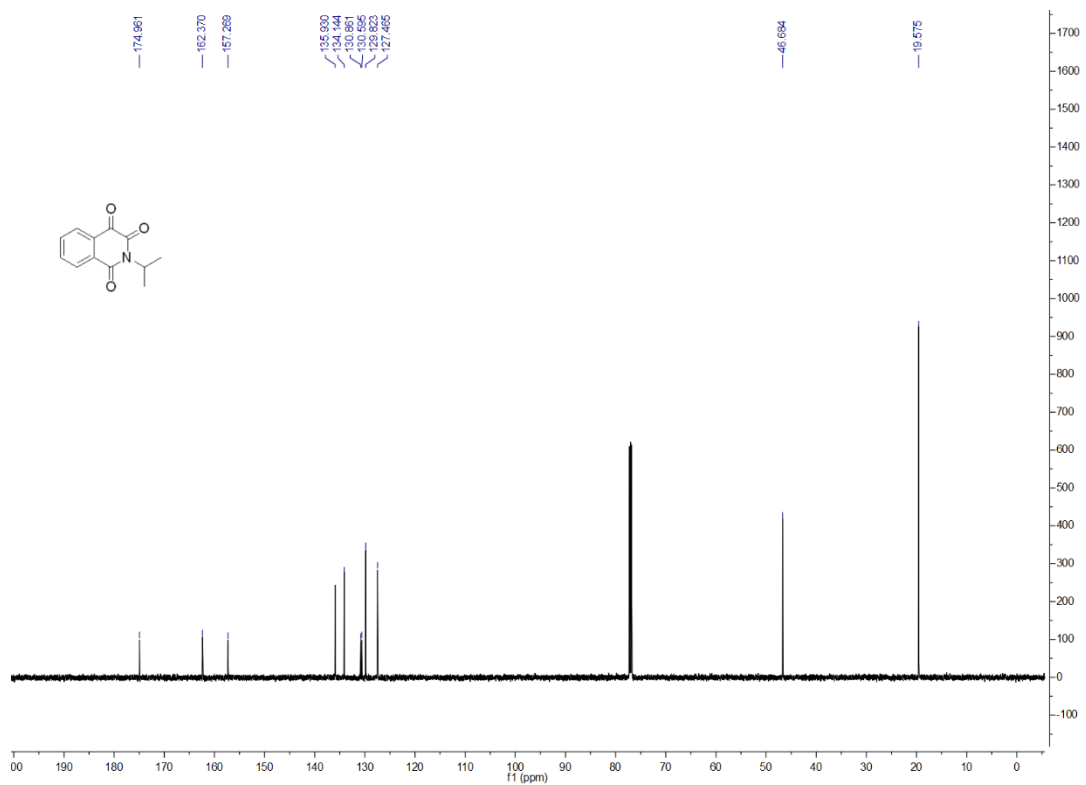

# <sup>1</sup>H NMR and <sup>13</sup>C NMR spectra of compound 4ad

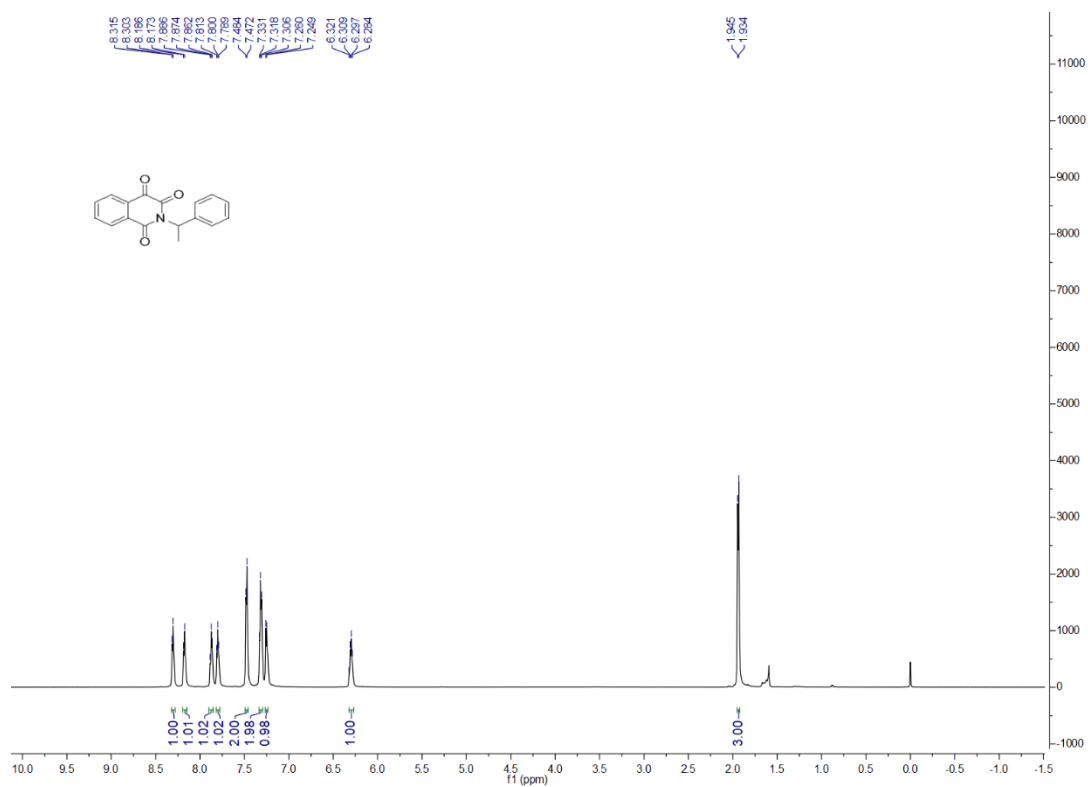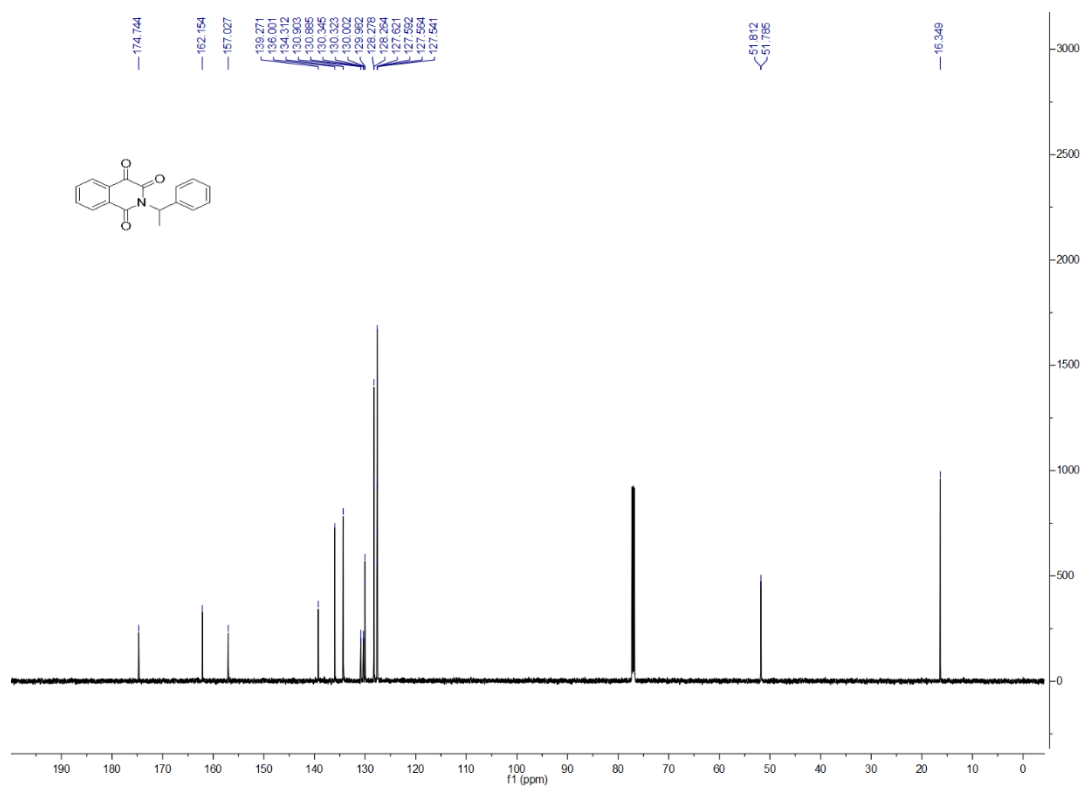



# <sup>1</sup>H NMR and <sup>13</sup>C NMR spectra of compound 4ae

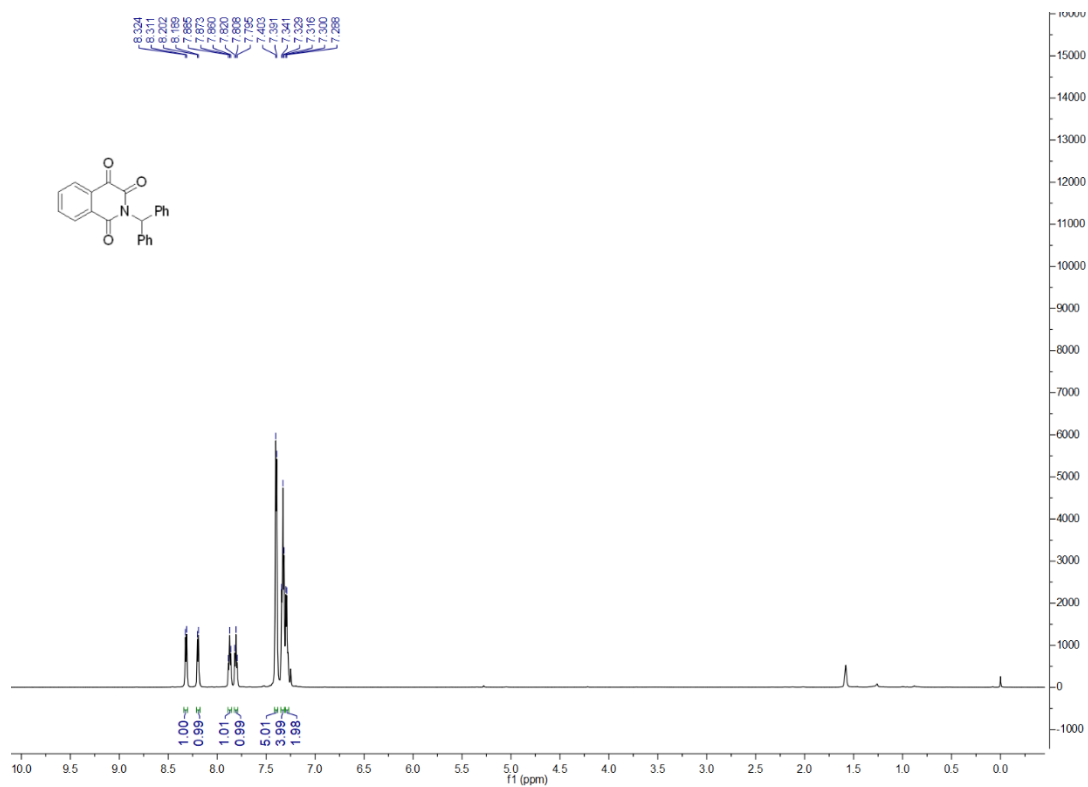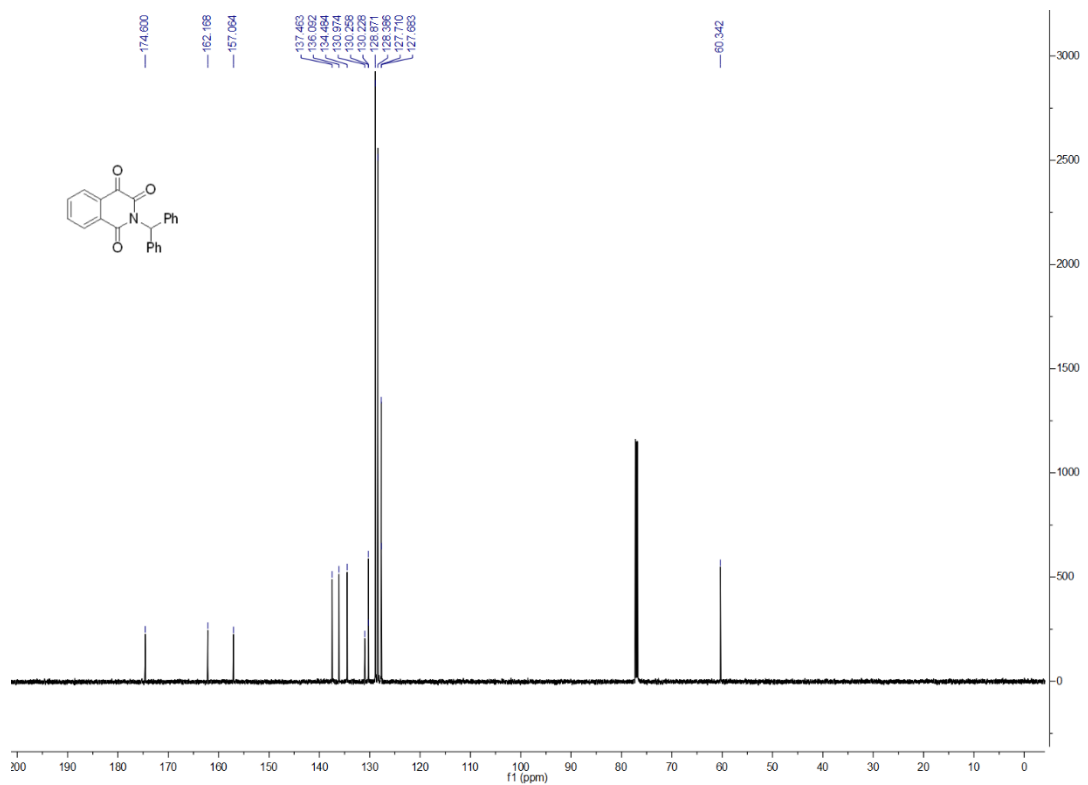

# <sup>1</sup>H NMR and <sup>13</sup>C NMR spectra of compound 4af

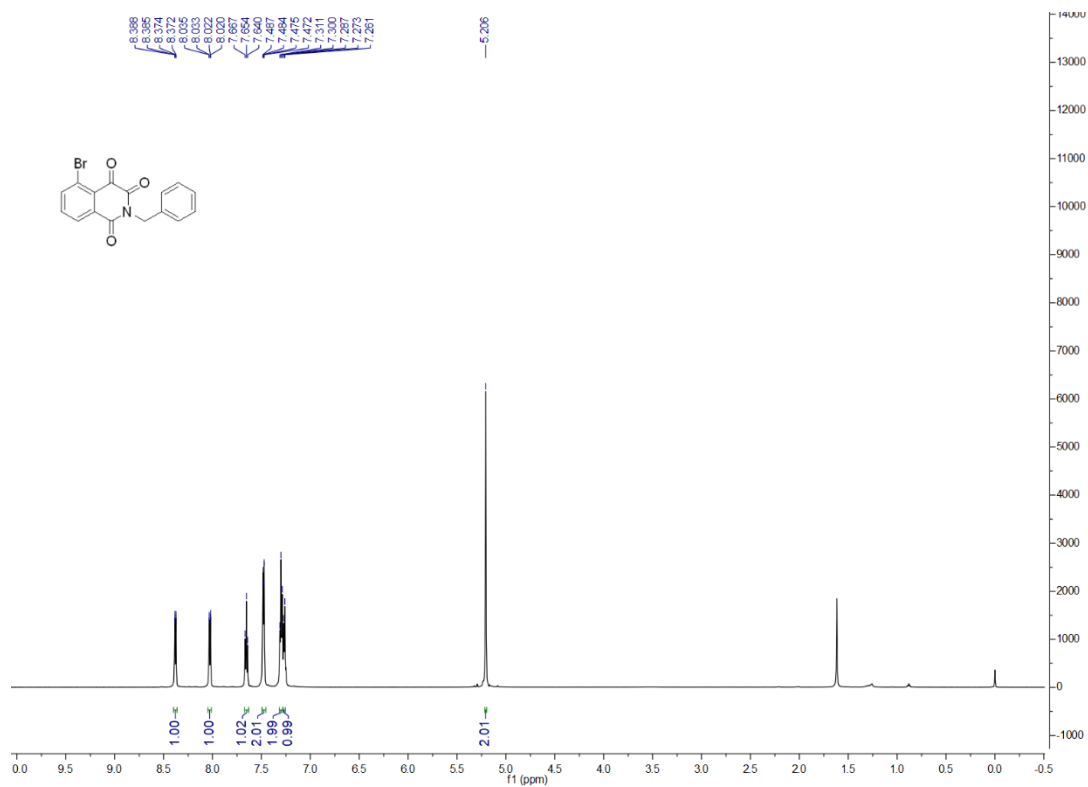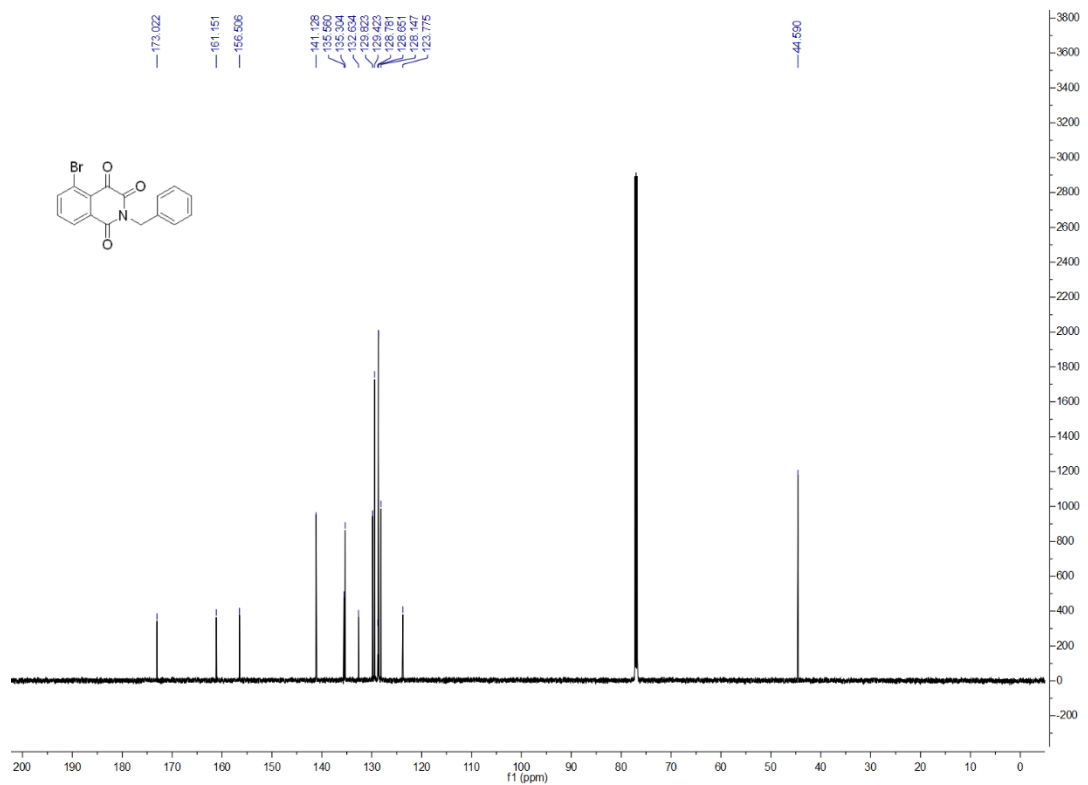

# <sup>1</sup>H NMR and <sup>13</sup>C NMR spectra of compound 4ah

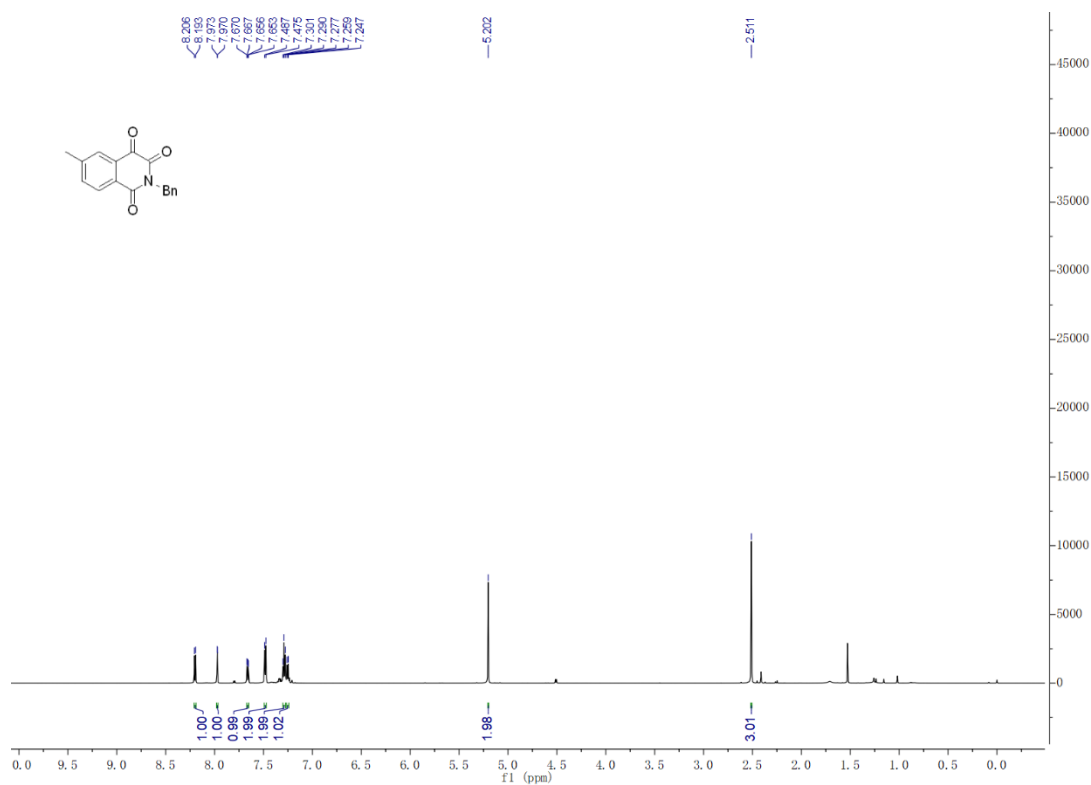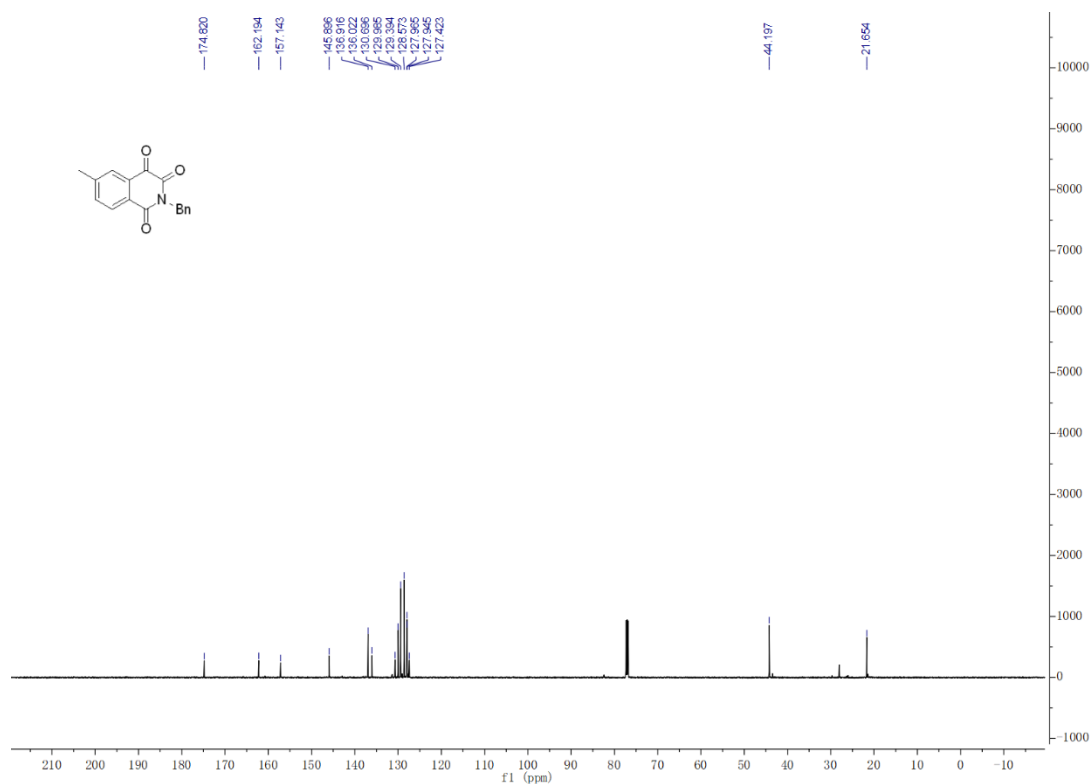

# <sup>1</sup>H NMR and <sup>13</sup>C NMR spectra of compound 4ai

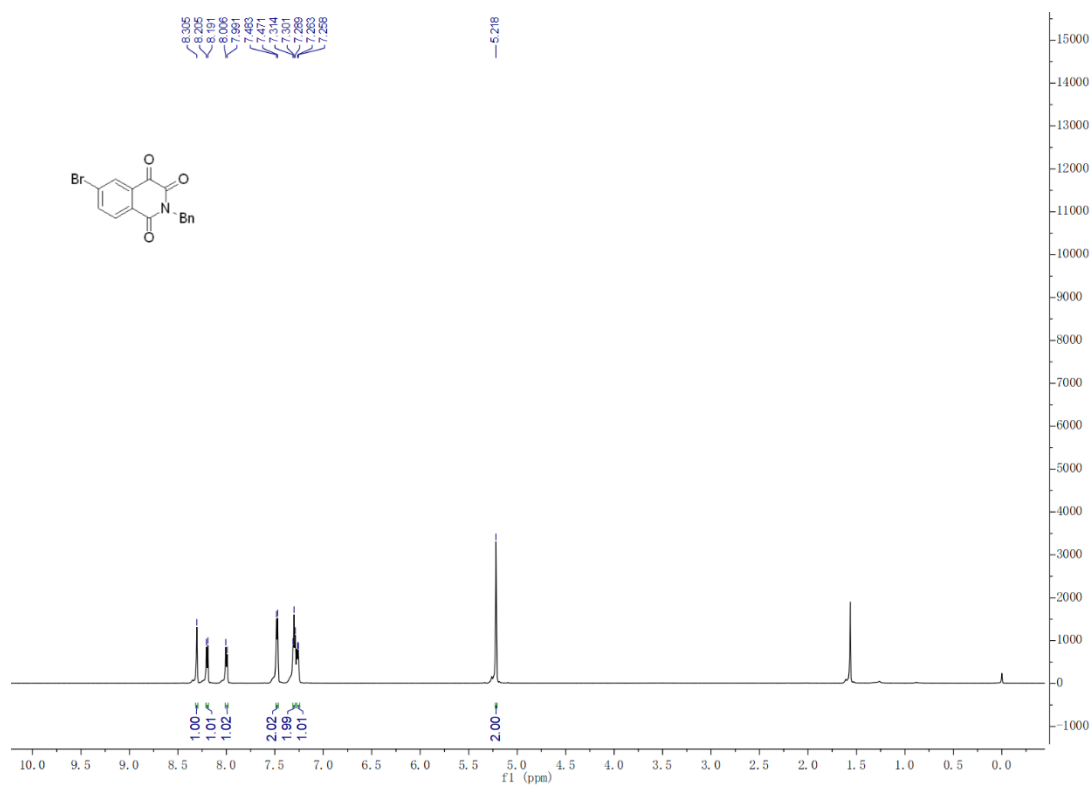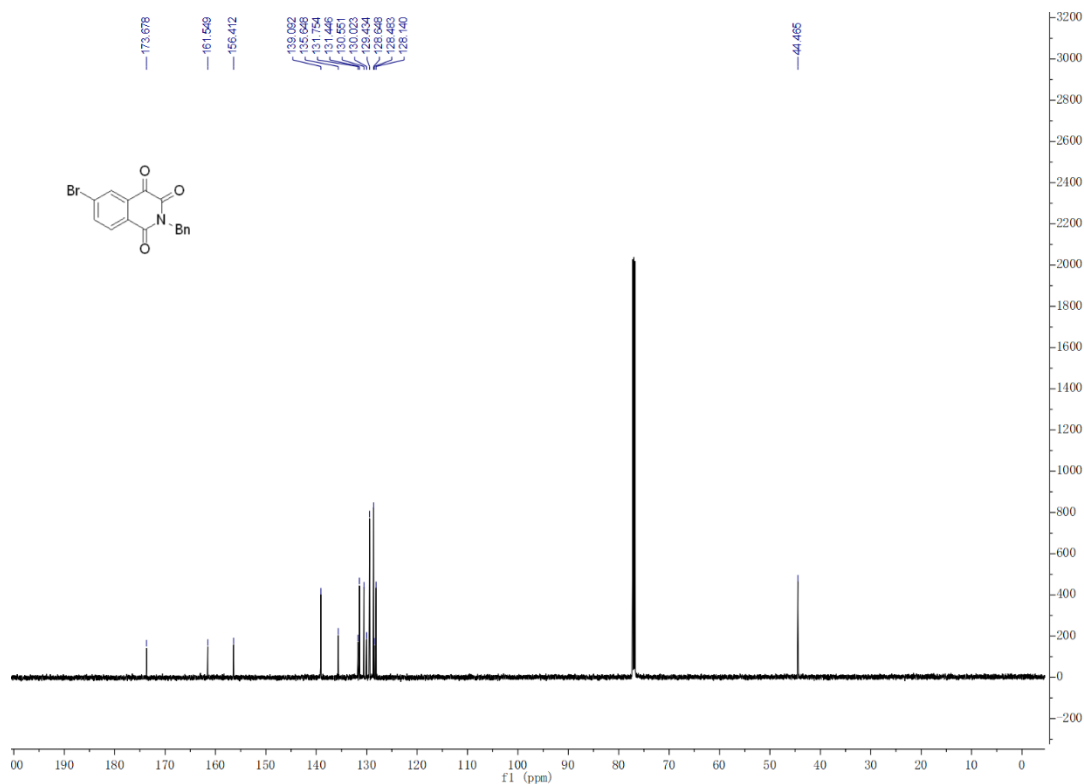

# <sup>1</sup>H NMR and <sup>13</sup>C NMR spectra of compound 4aj

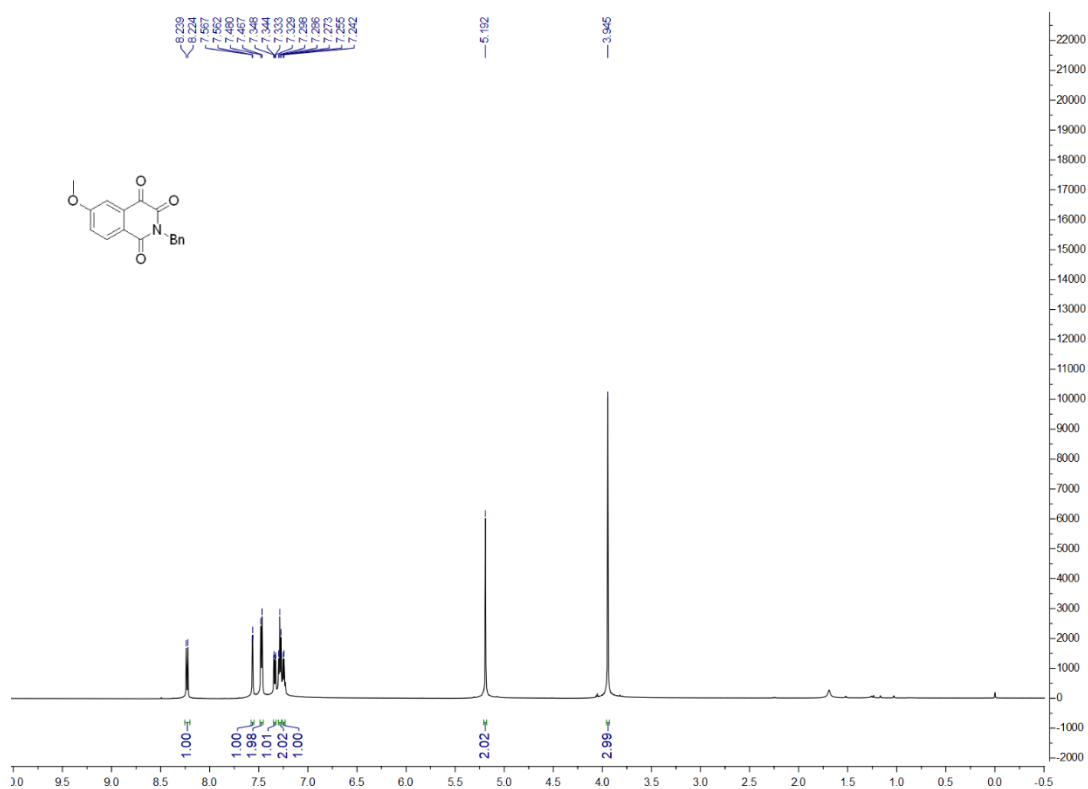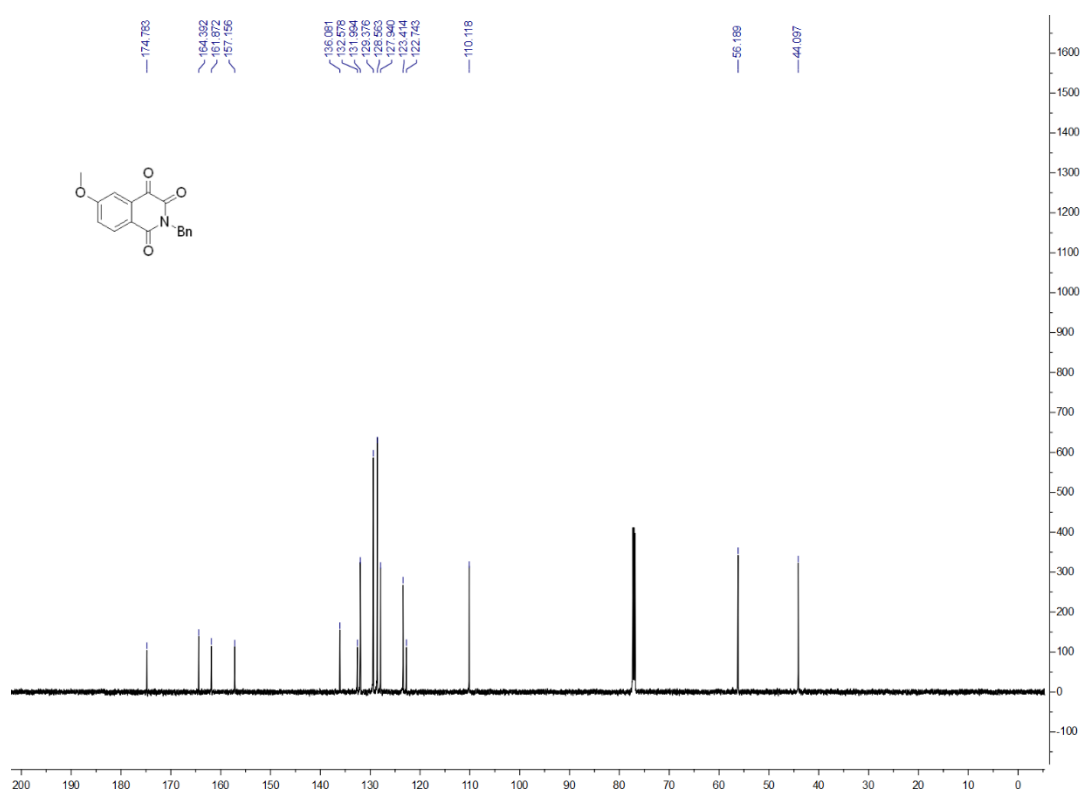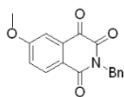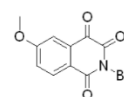

<sup>1</sup>H NMR and <sup>13</sup>C NMR spectra of compound **4ak**

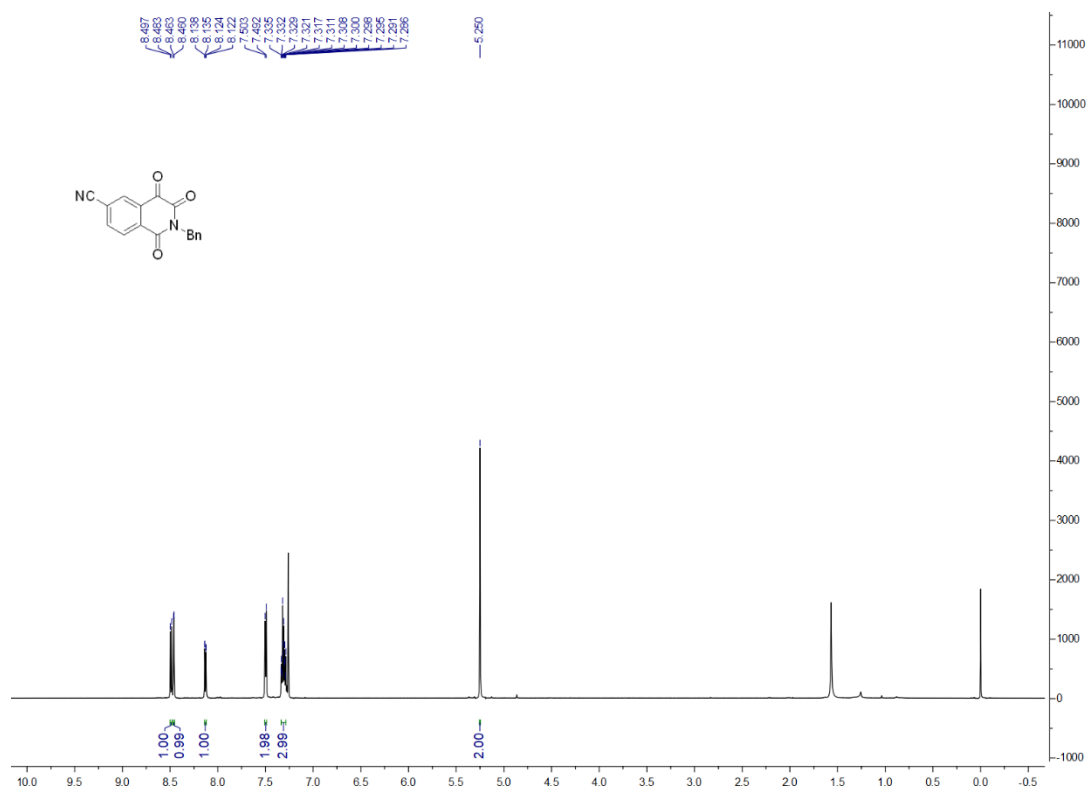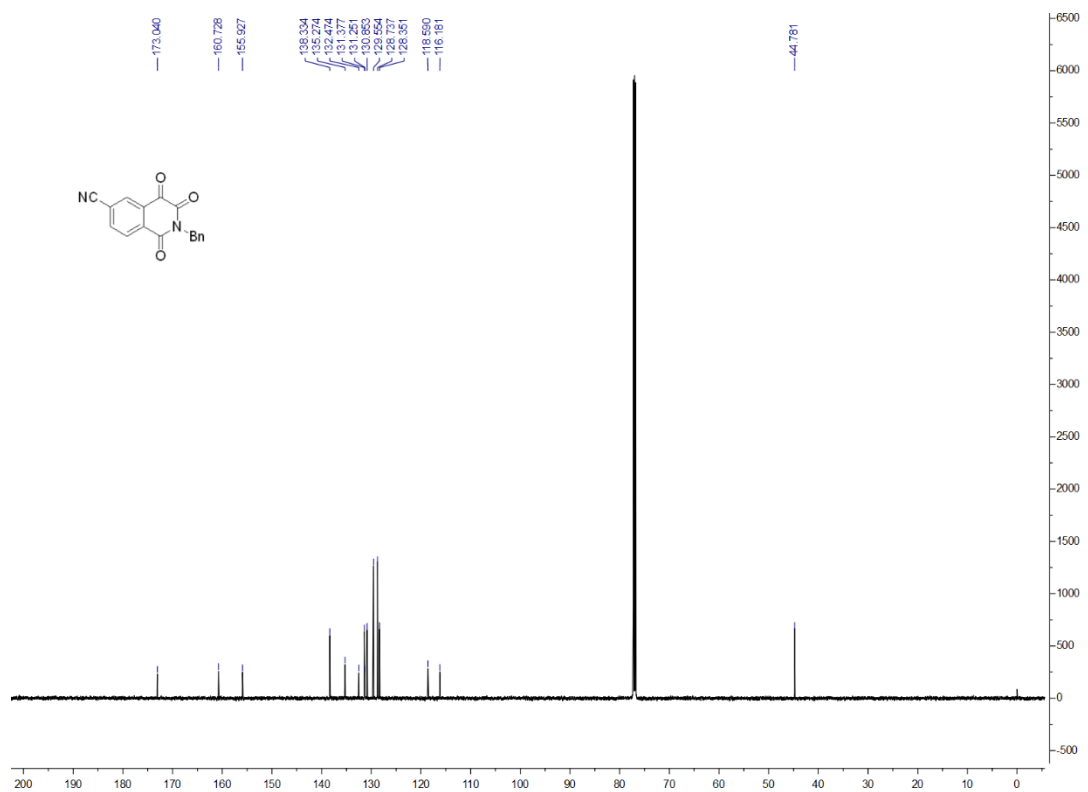

<sup>1</sup>H NMR and <sup>13</sup>C NMR spectra of compound 5

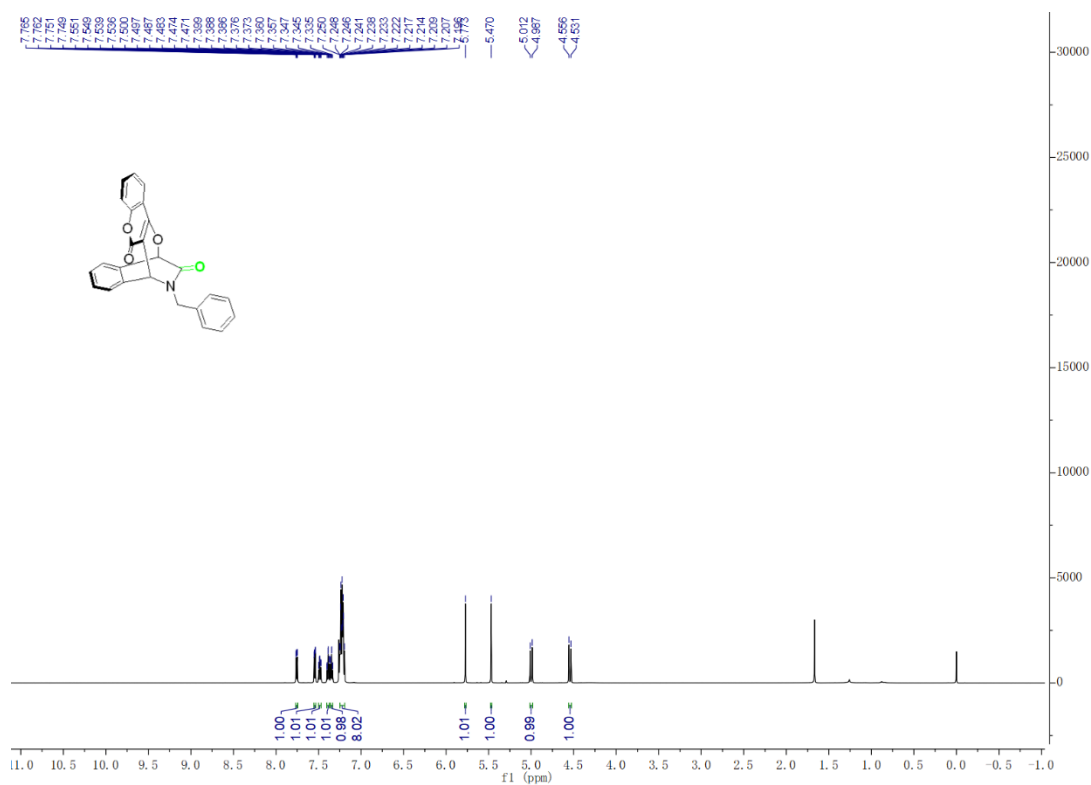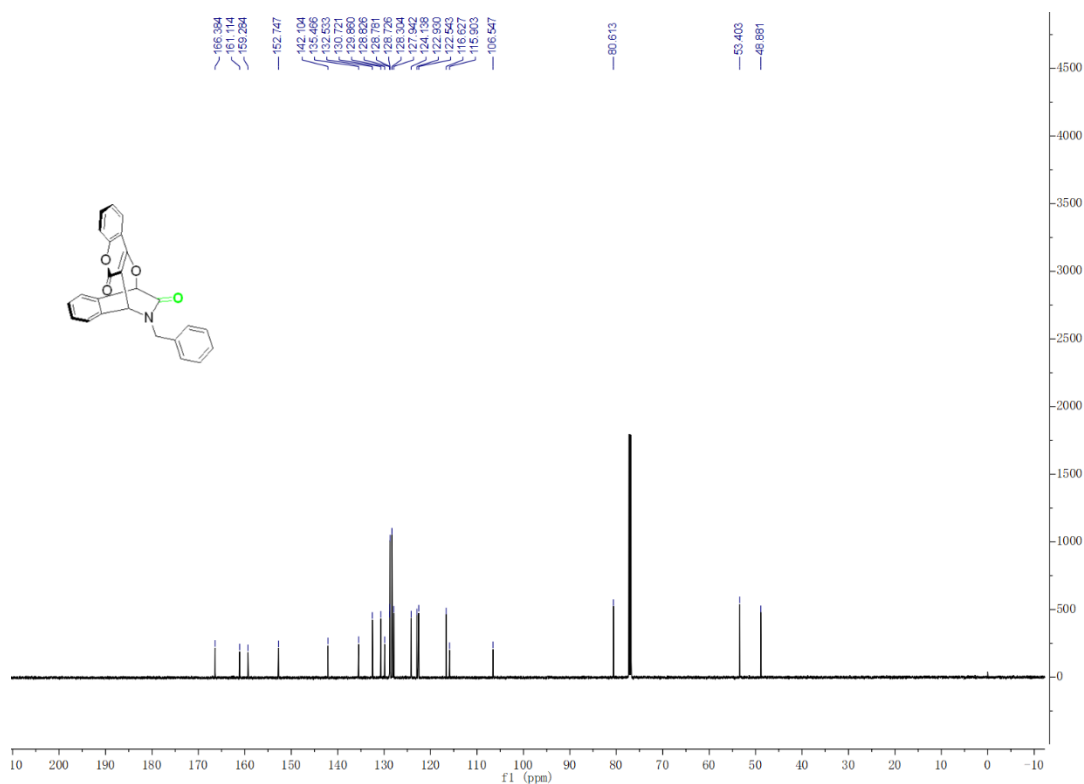

# 1H NMR and 13C NMR spectra of compound 6

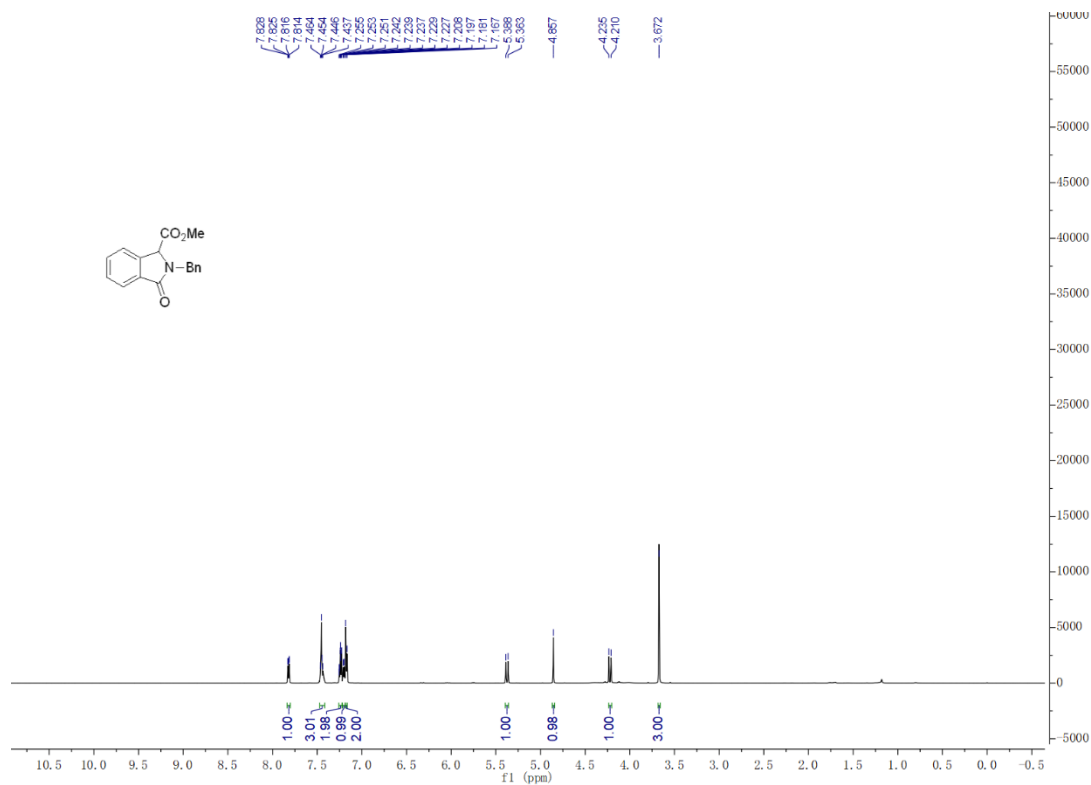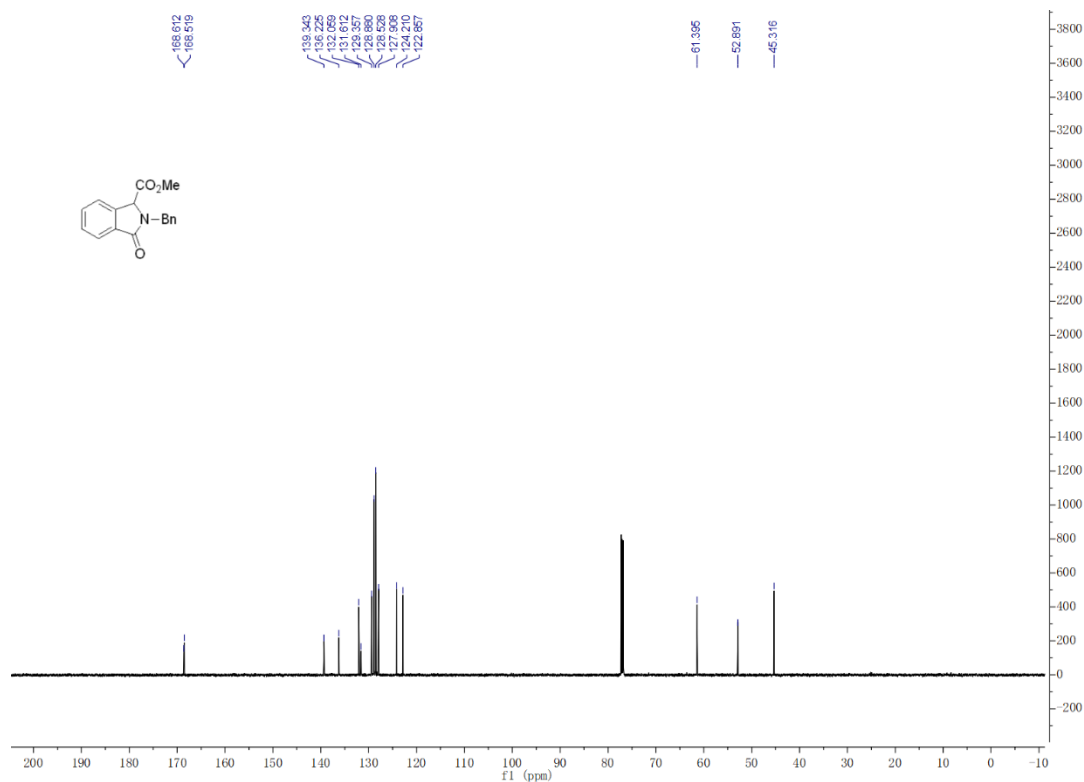



$^{19}\text{F}$  NMR spectra of compounds **3g**, **3h**, **3n**, **3am**, **4g**, **4h**, **4n**.

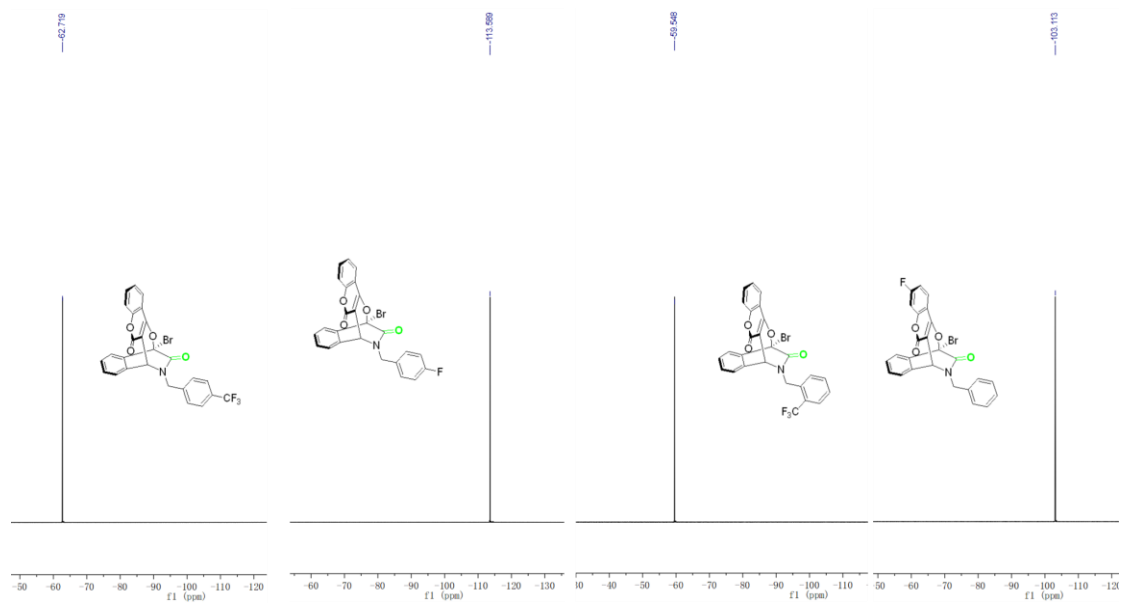

Supplement: d2qo00887d1.pdf [file d2qo00887d1.pdf]
